# Supplementary material for: The microbial colonization of activated carbon block point-of-use (PoU) filters with and without chlorinated phenol disinfection by-products
Source: Royal Society of Chemistry journal article supplement (doi:10.1039/c7ew00134g), 2017-01-01
Supplement: c7ew00134g1.pdf [file c7ew00134g1.pdf]

## **The microbial colonization of activated carbon block point-of-use (PoU) filters with and without chlorinated phenol disinfection byproducts**

### **Electronic Supplementary Information**

#### **Contents:**

1. Biofilm induction in *P. aeruginosa* strains with pentachlorophenol
2. PoU manifold system setup and operation
3. Characteristics of commercial PoU filter
  - 3.1 Physical characteristics of activated carbon block
  - 3.2 SEM image of fabric membrane
4. Table of the water volume processed for PoU filters
5. Image of used fabric membranes
6. Sample schedule and sample type
7. Chlorophenol analysis
8. Total mass of DNA extracted
9. The number of quality-filtered sequences per sample
10. Relative abundance of dominant OTUs (>1%) in influent, effluent, and fabric samples
11. Statistical analysis of bacterial community structures
12. OTUs correlated with Weighted Unifrac based PCoA plots of fabric and effluent samples
13. Water chemistry of PoU filter
  - 13.1 Influent and effluent pH measurements
  - 13.2 TOC
  - 13.3 Average water quality of all treatments in influent and effluent
  - 13.4 Estimation of the depth of penetration of PCP into activated carbon block
14. Estimation of cell protein obtained from the cell load in influents
15. Estimation of cell protein formed from PCP utilization
  - 15.1 Theoretical yield of PCP
  - 15.2 Theoretical oxygen demand of PCP in PCP-fed fabric membranes
  - 15.3 Theoretical cell biomass and cell protein yielded from PCP utilization
16. Supplemental references

### 1. Biofilm induction in *P. aeruginosa* strains with pentachlorophenol

Biofilm production by *P. aeruginosa* was quantified using a method described by O'Toole.<sup>1</sup> Overnight cultures of *P. aeruginosa* PAO1 and PA14 were diluted 1:100 in low salt LB medium and incubated with and w/o 100  $\mu$ M of pentachlorophenol in 96-well microtiter plates for 20 hours at 37°C. Following incubation, cells in liquid cultures were removed and cells attached to the microtiter plate wells were stained with crystal violet. Subsequently, crystal violet retained in each well was solubilized in 30% acetic acid and quantified at 550 nm. Both *P. aeruginosa* PAO1 and PA14 produced more biofilm in the presence of pentachlorophenol.

**Table S1.** Biofilm quantity measured as optical density at OD550 nm.

| Strain name and condition   | PAO1 w/o PCP  | PAO1 with PCP | PA14 w/o PCP  | PA14 with PCP |
|-----------------------------|---------------|---------------|---------------|---------------|
| Optical density at OD550 nm | 1.8 $\pm$ 0.2 | 3.1 $\pm$ 0.2 | 0.5 $\pm$ 0.1 | 0.9 $\pm$ 0.1 |

## 2. PoU Manifold system setup and operation

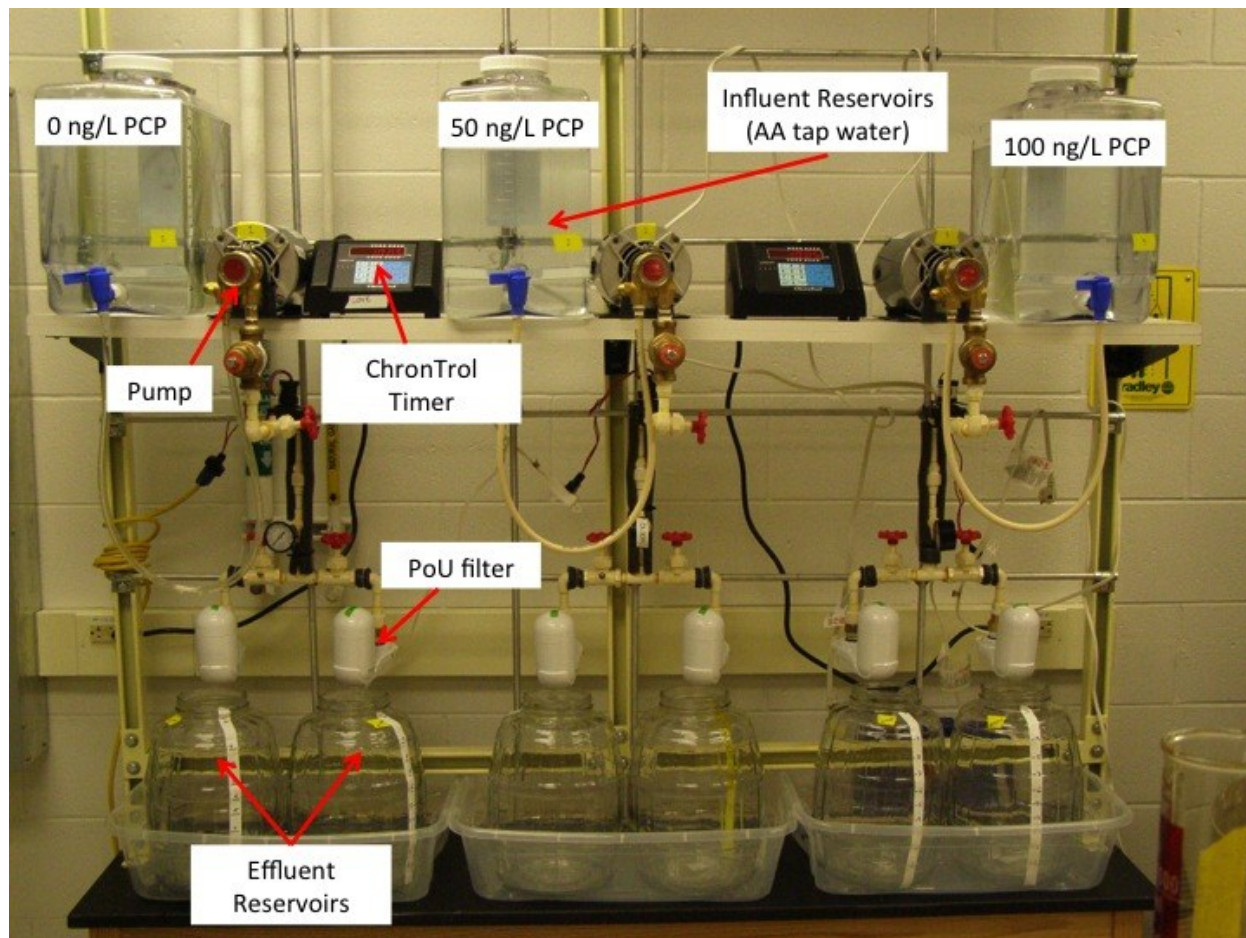

**Fig. S1.** Manifold system with influent reservoirs, duplicate PoU filters and effluent reservoirs.

As shown in Fig. S1, the general apparatus for the experiment consisted of a 20 L polycarbonate carboy connected by tubing to a brass 3/8 inch Procon rotary vane pump rated at 100 gallons per hour (gph) with a maximum pressure of 250 psi and a maximum temperature of 150° F. The pump was powered by a ¼ horsepower Marathon Electric motor rated at 1725 rpm and 60/50 Hz. The rotary vane pump was directly connected to a ½ inch CASH ACME brass pressure regulator that allowed inlet pressure up to 400 psi and outlet pressure adjustable between 10 and 70 psi (maximum temperature 180 °F). This was set to approximately 42 psi on each rig to simulate household water pressure. Brass size adapters were in place to adjust between the 3/8 inch pump and the ½ in pressure regulator. Following the pressure regulator, ½ inch CPVC manual flow regulator valve was in place to moderate the flow to the overall system. Half inch CPVC was then placed to connect to the ½ inch 120VAC pilot operated ALCON brand normally closed

(NC) solenoid valves which controlled the flow. The solenoid valves could handle a maximum pressure of 150 psi and a maximum temperature of 120 °F. Half inch CPVC again followed the solenoid valve, at one point branching off to the pressure gauge as shown in Fig. S1. The flow was then split with a ½ inch CPVC T-connector and each branch contained a manual flow regulator valve because it was found that there was a great degree of hydraulic variation among the PoU filters. Finally a brass ½ inch CPVC to hose fitting was placed on the end and a number of faucet adapters were put into place to match one of four fittings that came with the faucet filter. Teflon tape and/or CPVC cement was used at each connection point as needed. Finally the PoU filter was attached to its proprietary fitting. The whole apparatus was affixed to the metal grid with zip ties for stability.

### 3. Characteristics of commercial PoU filter

#### 3.1 Physical characteristics of activated carbon block

**Table S2.** Physical characteristics of commercial PoU activated carbon block\*.

| Filter No. | Brunauer-Emmett-Teller<br>(BET) Surface Area, m <sup>2</sup> /g | Pore Size, Å | Porosity        |
|------------|-----------------------------------------------------------------|--------------|-----------------|
| 1          | 578 (20)                                                        | 22.1 (0.8)   | 0.0621 (0.0002) |
| 2          | 661 (26)                                                        | 21.8 (0.02)  | 0.0666 (0.0026) |
| 3          | 548 (26)                                                        | 22.1 (0.6)   | 0.0540 (0.0013) |

\*Standard deviations are shown in the parenthesis

### 3.2 SEM image of fabric membrane

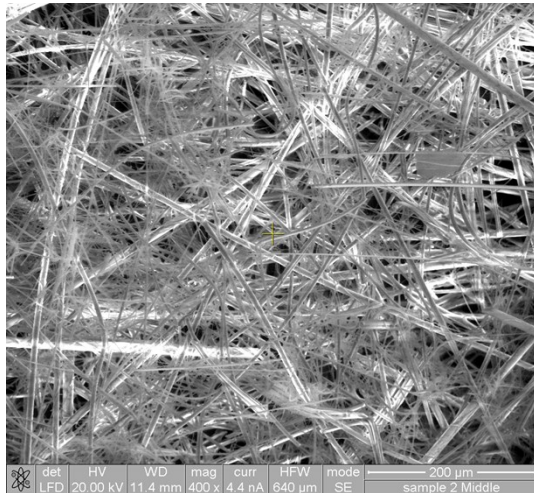

(a)

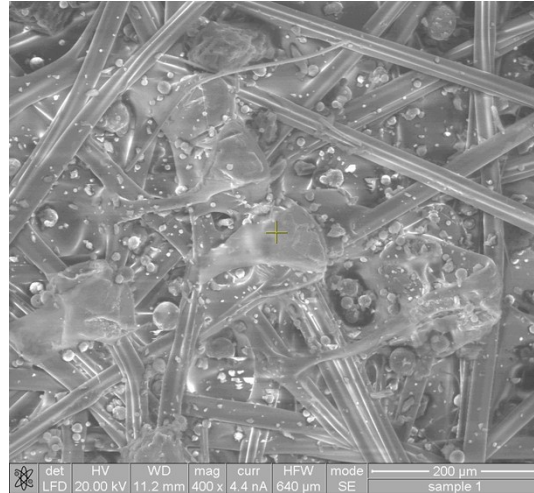

(b)

**Fig. S2.** SEM image of fabric membrane.

Scanning electron micrographs of the two layers of the PoU filter fabric that make up the components extracted in biomass and community analyses. Both micrograph images are shown at the same magnification and the scale bar represents 200 μm. (a) Glass fiber filter layers that faced influent side. (b) Polymeric fiber filter layer that faced the activated carbon block.

#### 4. Table of the water volumes processed for PoU filters

**Table S3.** Total volumes of water processed for PoU filters.

| PCP treatment (ng/L) |             | Total volume of water processed (L) |
|----------------------|-------------|-------------------------------------|
| 0                    | Replicate 1 | 485                                 |
|                      | Replicate 2 | 494                                 |
| 50                   | Replicate 1 | 505                                 |
|                      | Replicate 2 | 562                                 |
| 100                  | Replicate 1 | 484                                 |
|                      | Replicate 2 | 583                                 |
| Average              |             | 519                                 |

## 5. Image of used fabric membranes

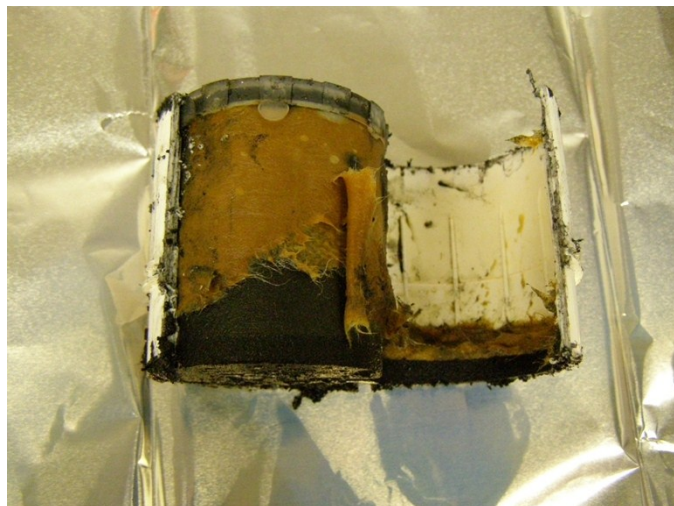

**Fig. S3.** PoU filter disassembly.

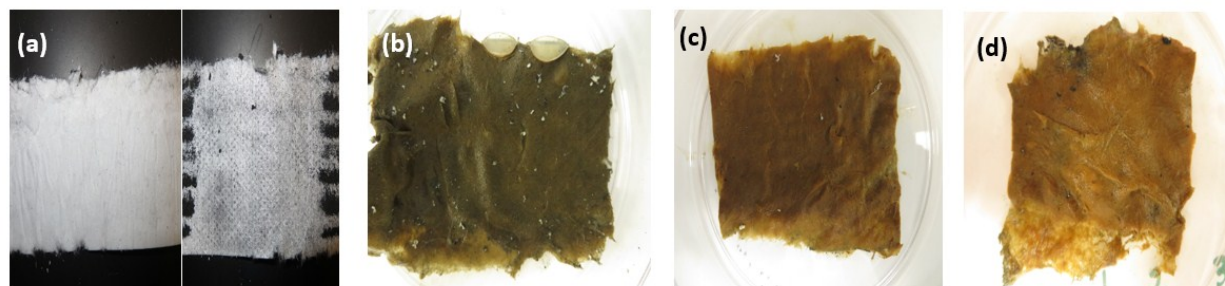

**Fig. S4.** Representative images of fabric membranes. (a) Clean fabric that faced influent side (left) and activated carbon block (right); and used fabrics that were sacrificed after 67-day operation spiked with (b) 0 ng/L PCP; (c) 50 ng/L PCP; and (d) 100 ng/L PCP, respectively. The control fabric was dark grey while the fabrics of all filters exposed to PCP were medium to light tan.



## 6. Sample schedule and sample type

Water quality parameters including total alkalinity, total and dissolved organic carbon (TOC and DOC), specific UV absorbance (SUVA), pH, chlorophenols, free and total chlorine residual and heterotrophic plate count (HPC) were measured regularly in grab or composite samples as noted on the sample schedule in Table S4. For the two week composite sample, 150 mL aliquots were collected from each influent and effluent container daily, dechlorinated and acidified, and added to an amber composite glass jar for each sample location. Composited aliquots were collected daily for two weeks to create a composite sample for influent and effluent TOC and chlorophenol analysis.

**Table S4.** Sample schedule and sample type of water analysis.

| Parameter                               | Frequency | Influent | Effluent | Sample type                      |
|-----------------------------------------|-----------|----------|----------|----------------------------------|
| Total alkalinity                        | Weekly    | X        |          | Grab                             |
| DOC                                     | 2 Weeks   | X        |          | Grab                             |
| SUVA                                    | 2 Weeks   | X        |          | Grab                             |
| pH                                      | Weekly    | X        | X        | Grab                             |
| Free and total Cl <sub>2</sub> residual | Weekly*   | X        | X        | Grab                             |
| Chlorophenols                           | Daily     | X        | X        | 2-wk composite, acidified (pH 2) |
| TOC                                     | Daily     | X        | X        | 2-wk composite, acidified (pH 2) |
| HPC                                     | Weekly    | X        | X        | Grab                             |

\*Effluent samples were analyzed for total Cl<sub>2</sub> residual twice during the experiment (at 30 and 52 days).

## 7. Chlorophenol analysis

Dichlorophenol, trichlorophenol, tetrachlorophenol, and pentachlorophenol were analyzed for and quantified using a solid phase extraction (SPE) and gas chromatography –electron capture detector (GC-ECD) method. The less chlorinated forms were analyzed in case they were formed as products of PCP degradation. The samples were concentrated by passing through a modified polystyrene divinyl benzene copolymer. The analytes were reverse-eluted with methanol and derivatized by acetic anhydride. The acetyl derivatives were extracted into hexane and then analyzed by GC-ECD.

One liter of water sample was spiked with 25  $\mu$ l of 1 mg/L dimethylnitrobenzene (DMNB), which functioned as a surrogate. The SPE cartridge was styrene/divinyl benzene porous polymer packing available as Supelclean ENVI-Chrom P (500 mg/6 ml) (Supelco, Bellefonte, PA). It was pre-conditioned with 3 mL methanol two times and activated by 3 mL acidified (pH2) Milli-Q water three times. The cartridges were kept wet during condition, and an additional 3 mL more Milli-Q water was added as the flow rate was adjusted to maintain the cartridge wet as the sample began to load.

The one liter water sample spiked with surrogate was loaded at the flow rate of 4-6 ml per minute (about 3-4 drops per second). After the sample had finished loading, 20 mL of acidified Milli-Q water was used to rinse the sample bottle two times and was passed through the cartridge. Finally, the cartridges were dried for 25-30 minutes on the manifold with the vacuum on to remove residual water.

Since chlorophenols are nonpolar, they were strongly retained by the sorbent. The SPE cartridge was turned upside down during the elution process. This reverse-elution helps to remove the chlorophenols on the sorbent surface and minimizes the volume of solvent, which achieves better recovery. Thus, 3 ml of methanol was used to reverse-elute analytes at a flow rate of 0.5 ml/minute (approximately 1 drop every 3-4 seconds). Before the first 3 mL methanol finished passing through the cartridge, 2 mL more methanol was added for another elution. After the methanol passed through, the manifold port valves were fully opened to collect residual methanol. The eluent was stored below -10°C.

To improve the chromatographic detection of the analytes, the eluent was derivatized using acetic anhydride and extracted from methanol to hexane through the following steps. The methanol eluent was spiked with 2 ml of 5% potassium carbonate solution, 25  $\mu$ L of 6 mg/L trichlorotoluene (TCT) as an internal standard, 2 mL hexane, and 400  $\mu$ L of acetic anhydride in that order. The solution was vortexed for 40 s at 3000 rpm and let stand for 1 min. The top hexane phase was extracted into a 5 mL volumetric flask. Subsequently, another 1 mL hexane was added in the solution, and went through the same vortex step. The top hexane phase was collected and aggregated with the previous extract. The final volume was adjusted with hexane to 5 mL and stored in the GC vials. Since TCT was unaffected by the derivatization step, any variations in TCT area counts can be attributed to the extraction efficiency or instrument measurements.

The extracted samples were analyzed by HP 6890 series GC with ECD (Agilent, Palo Alto, USA). The column was an Agilent 19091H-433 GC-ECD capillary column (30 m  $\times$  0.25 mm i.d, 0.25- $\mu$ m film thickness). The injector and detector temperatures were all set at 250°C. Nitrogen was used as the carrier gas at a flowrate of 0.9 mL/min. The GC oven temperature was started from initial temperature of 40°C, which was held for 30 s, followed by an increase at a rate of 10°C /min to 240°C, which was held for 2.5 min, and then increased at 10°C /min to 250°C, which was held for 3.5 min. The total run time was 27.5 min. A volume of 2.0  $\mu$ L sample was injected into the GC.

The detection limit of pentachlorophenol was 10 ng/L. The detection limits of dichlorophenol, trichlorophenol, and tetrachlorophenol are 25 ng/L. During the operation of the PoU manifold system, no chlorophenols were detected in the influent control water samples.

## 8. Total mass of DNA extracted

**Table S5.** Total mass of DNA extracted<sup>1</sup>

| Sample type         | PCP treatment (ng/L) | Operation days | DNA concentrations<br>(ng/L water or ng/cm <sup>2</sup> fabric area) |            |
|---------------------|----------------------|----------------|----------------------------------------------------------------------|------------|
| Influent            | 0                    | 58             | 14                                                                   |            |
|                     |                      | 65             | 16                                                                   |            |
|                     |                      | 42             | 5                                                                    |            |
|                     | 50                   | 58             | 9                                                                    |            |
|                     |                      | 66             | 10                                                                   |            |
|                     |                      | 42             | 7                                                                    |            |
|                     | 100                  | 51             | 4                                                                    |            |
|                     |                      | 58             | 15                                                                   |            |
|                     |                      | 66             | 14                                                                   |            |
|                     | Effluent             | 0              | 42                                                                   | 637        |
|                     |                      |                | 58                                                                   | 737        |
|                     |                      |                | 65                                                                   | 53         |
| 50                  |                      | 42             | 359                                                                  |            |
|                     |                      | 58             | 661                                                                  |            |
|                     |                      | 66             | 46                                                                   |            |
| 100                 |                      | 42             | 775                                                                  |            |
|                     |                      | 51             | 382                                                                  |            |
|                     |                      | 58             | 524                                                                  |            |
|                     |                      |                | 66                                                                   | 36         |
|                     |                      | 0              | 67 (end)                                                             | 1034 (389) |
|                     |                      | 50             | 67 (end)                                                             | 216 (83)   |
| Fabric <sup>3</sup> | 100                  | 67 (end)       | 399 (145)                                                            |            |

<sup>1</sup> Standard deviations are shown in parenthesis.

<sup>2</sup> The averages are taken from the total sample number of two (duplicate PoU filter replicates of each treatment).

<sup>3</sup> Fabric DNA was extracted from four fabric pieces of each PoU filter replicate. The averages and standard deviations are taken from the total sample number of eight for each treatment.

## 9. The number of quality-filtered sequences per sample

**Table S6 Number of quality-filtered sequences per sample**

| Sample name (Sample code)                                                          | Number of quality filtered sequences |
|------------------------------------------------------------------------------------|--------------------------------------|
| Influent at day 58 (12Infl1)                                                       | 16969                                |
| Influent at day 65 (15Infl1)                                                       | 18123                                |
| Influent spiked with 100 ng/L PCP at day 42 (11Infl3)                              | 16730                                |
| Influent spiked with 100 ng/L PCP at day 51 (30Infl3)                              | 21080                                |
| Influent spiked with 100 ng/L PCP at day 58 (12Infl3)                              | 8906                                 |
| Influent spiked with 100 ng/L PCP at day 66 (15Infl3)                              | 33370                                |
| Influent spiked with 50 ng/L PCP at day 42 (11Infl2)                               | 11826                                |
| Influent spiked with 50 ng/L PCP at day 58 (12Infl2)                               | 15114                                |
| Influent spiked with 50 ng/L PCP at day 66 (15Infl2)                               | 11140                                |
| Effluent from PoU filter replicate 1 at day 58 (12Effl1A)                          | 31902                                |
| Effluent from PoU filter replicate 1 at day 65 (15Effl1A)                          | 28817                                |
| Effluent from PoU filter replicate 2 at day 65 (15Effl1B)                          | 21222                                |
| Effluent from PoU filter replicate 2 at day 42 (11Effl1B)                          | 34660                                |
| Effluent from PoU filter replicate 2 at day 58 (12Effl1B)                          | 32940                                |
| Effluent from PoU filter replicate 1 spiked with 50 ng/L PCP at day 42 (11Effl2A)  | 29800                                |
| Effluent from PoU filter replicate 1 spiked with 50 ng/L PCP at day 58 (12Effl2A)  | 24947                                |
| Effluent from PoU filter replicate 1 spiked with 50 ng/L PCP at day 66 (15Effl2A)  | 28433                                |
| Effluent from PoU filter replicate 2 spiked with 50 ng/L PCP at day 42 (11Effl2B)  | 35147                                |
| Effluent from PoU filter replicate 2 spiked with 50 ng/L PCP at day 58 (12Effl2B)  | 51757                                |
| Effluent from PoU filter replicate 2 spiked with 50 ng/L PCP at day 66 (15Effl2B)  | 34253                                |
| Effluent from PoU filter replicate 1 spiked with 100 ng/L PCP at day 51 (30Effl3A) | 29097                                |
| Effluent from PoU filter replicate 1 spiked with 100 ng/L PCP at day 58 (12Effl3A) | 39211                                |
| Effluent from PoU filter replicate 1 spiked with 100 ng/L PCP at day 66 (15Effl3A) | 35273                                |
| Effluent from PoU filter replicate 2 spiked with 100 ng/L PCP at day 42 (11Effl3B) | 29200                                |
| Effluent from PoU filter replicate 2 spiked with 100 ng/L PCP at day 51 (30Effl3B) | 27007                                |
| Effluent from PoU filter replicate 2 spiked with 100 ng/L PCP at day 58 (12Effl3B) | 45935                                |
| Effluent from PoU filter replicate 2 spiked with 100 ng/L PCP at day 66 (15Effl3B) | 27316                                |
| Fabric from PoU filter replicate 1 (F1A1)                                          | 30653                                |
| Fabric from PoU filter replicate 1 (F1A2)                                          | 34762                                |
| Fabric from PoU filter replicate 1 (F1A3)                                          | 34063                                |
| Fabric from PoU filter replicate 1 (F1A4)                                          | 33036                                |
| Fabric from PoU filter replicate 2 (F1B1)                                          | 23241                                |
| Fabric from PoU filter replicate 2 (F1B2)                                          | 19724                                |
| Fabric from PoU filter replicate 2 (F1B3)                                          | 21551                                |
| Fabric from PoU filter replicate 2 (F1B4)                                          | 25802                                |
| Fabric from PoU filter replicate 1 with 50 ng/L PCP (F2A1)                         | 30989                                |
| Fabric from PoU filter replicate 1 with 50 ng/L PCP (F2A2)                         | 35717                                |
| Fabric from PoU filter replicate 1 with 50 ng/L PCP (F2A3)                         | 39039                                |

**Table S6 Number of quality-filtered sequences per sample (continue)**

| Sample name (Sample code)                                   | Number of quality filtered sequences |
|-------------------------------------------------------------|--------------------------------------|
| Fabric from PoU filter replicate 1 with 50 ng/L PCP (F2A4)  | 35982                                |
| Fabric from PoU filter replicate 2 with 50 ng/L PCP (F2B1)  | 24329                                |
| Fabric from PoU filter replicate 2 with 50 ng/L PCP (F2B2)  | 24866                                |
| Fabric from PoU filter replicate 2 with 50 ng/L PCP (F2B3)  | 25130                                |
| Fabric from PoU filter replicate 2 with 50 ng/L PCP (F2B4)  | 34280                                |
| Fabric from PoU filter replicate 1 with 100 ng/L PCP (F3A1) | 31916                                |
| Fabric from PoU filter replicate 1 with 100 ng/L PCP (F3A2) | 34024                                |
| Fabric from PoU filter replicate 1 with 100 ng/L PCP (F3A3) | 35265                                |
| Fabric from PoU filter replicate 1 with 100 ng/L PCP (F3A4) | 35306                                |
| Fabric from PoU filter replicate 2 with 100 ng/L PCP (F3B1) | 26131                                |
| Fabric from PoU filter replicate 2 with 100 ng/L PCP (F3B2) | 25446                                |
| Fabric from PoU filter replicate 2 with 100 ng/L PCP (F3B3) | 33834                                |
| Fabric from PoU filter replicate 2 with 100 ng/L PCP (F3B4) | 32299                                |

## **10. Relative abundance of dominant OTUs (>1%) in influent, effluent, and fabric samples.**

Data are available in a separate file: Table S7\_Relative abundance of OTUs.XLSX.

Influent community members were similar between PCP treatments ( $p>0.05$ , data not shown), despite the variation of the relative abundance among samples collected on different dates. Two OTUs (*Mycobacterium* and unclassified Bacteria OTU23) became “highly dominant” in the influent reservoirs that contained 50 and 100 ng/L PCP (Table 1). However, the relative abundances of these two OTUs were not significantly different between PCP treatments ( $p>0.05$ , Kruskal-Wallis test), not resulting in a significant influent community shift relative to the control.

## 11. Statistical analysis of bacterial community structure

**Table S8. Bacterial composition dissimilarity across PoU filter and PCP treatments.**

| Mean $\pm$ standard deviation                             | Taxa-based dissimilarity index |                              | Phylogeny-based dissimilarity index |                              |
|-----------------------------------------------------------|--------------------------------|------------------------------|-------------------------------------|------------------------------|
|                                                           | Jaccard                        | Abundance-based Jaccard      | Unweighted UniFrac                  | Weighted UniFrac             |
| I. Within paired samples that received the same treatment |                                |                              |                                     |                              |
| Influent                                                  | 0.57 $\pm$ 0.03 <sup>a</sup>   | 0.08 $\pm$ 0.02 <sup>a</sup> | 0.54 $\pm$ 0.03 <sup>a</sup>        | 0.22 $\pm$ 0.03 <sup>a</sup> |
| Fabric                                                    | 0.62 $\pm$ 0.05 <sup>b</sup>   | 0.03 $\pm$ 0.01 <sup>b</sup> | 0.61 $\pm$ 0.05 <sup>b</sup>        | 0.06 $\pm$ 0.02 <sup>b</sup> |
| Effluent                                                  | 0.64 $\pm$ 0.08 <sup>b</sup>   | 0.02 $\pm$ 0.01 <sup>c</sup> | 0.65 $\pm$ 0.07 <sup>b</sup>        | 0.11 $\pm$ 0.03 <sup>c</sup> |
| Between influent and effluent                             | 0.76 $\pm$ 0.07 <sup>c</sup>   | 0.30 $\pm$ 0.14 <sup>d</sup> | 0.75 $\pm$ 0.07 <sup>c</sup>        | 0.46 $\pm$ 0.05 <sup>d</sup> |
| Between fabric and effluent                               | 0.75 $\pm$ 0.06 <sup>c</sup>   | 0.12 $\pm$ 0.05 <sup>e</sup> | 0.75 $\pm$ 0.05 <sup>c</sup>        | 0.49 $\pm$ 0.05 <sup>e</sup> |
| Between influent and fabric                               | 0.66 $\pm$ 0.06 <sup>b</sup>   | 0.12 $\pm$ 0.05 <sup>e</sup> | 0.64 $\pm$ 0.06 <sup>b</sup>        | 0.42 $\pm$ 0.05 <sup>f</sup> |
| II. Between PCP and control samples                       |                                |                              |                                     |                              |
| Influent                                                  | 0.56 $\pm$ 0.04 <sup>a</sup>   | 0.07 $\pm$ 0.03 <sup>a</sup> | 0.53 $\pm$ 0.04 <sup>a</sup>        | 0.20 $\pm$ 0.06 <sup>a</sup> |
| Fabric                                                    | 0.64 $\pm$ 0.05 <sup>b</sup>   | 0.09 $\pm$ 0.02 <sup>f</sup> | 0.63 $\pm$ 0.06 <sup>b</sup>        | 0.14 $\pm$ 0.02 <sup>g</sup> |
| Effluent                                                  | 0.66 $\pm$ 0.08 <sup>b</sup>   | 0.02 $\pm$ 0.01 <sup>c</sup> | 0.67 $\pm$ 0.07 <sup>b</sup>        | 0.14 $\pm$ 0.03 <sup>g</sup> |

Letters indicate significant ( $P < 0.001$ ) differences based on Kruskal-Wallis test for each distance index. Groups with the same letters indicate they are not significantly different from each other.



**Table S9.** Multivariate permutational analysis (PERMANOVA) results comparing the bacterial composition between PoU filter location and PCP treatment.

|                             | Degrees of freedom | Sum of squares | Mean square | F.model | R <sup>2</sup> | Pr(>F) |
|-----------------------------|--------------------|----------------|-------------|---------|----------------|--------|
| Unweighted UniFrac distance |                    |                |             |         |                |        |
| PoU filter location         | 2                  | 2.69           | 1.35        | 6.97    | 0.22           | 0.005  |
| PCP treatment               | 2                  | 0.56           | 0.28        | 1.46    | 0.046          | 0.045  |
| Residuals                   | 46                 | 8.89           | 0.19        |         | 0.73           |        |
| Total                       | 50                 | 12.14          |             |         | 1.00           |        |
| Weighted UniFrac distance   |                    |                |             |         |                |        |
| PoU filter location         | 2                  | 3.34           | 1.67        | 221.49  | 0.88           | 0.005  |
| PCP treatment               | 2                  | 0.09           | 0.04        | 5.89    | 0.024          | 0.005  |
| Residuals                   | 46                 | 0.35           | 0.008       |         | 0.092          |        |
| Total                       | 50                 | 3.77           |             |         | 1              |        |

**12. OTUs correlated with Weighted Unifrac based PCoA plots of fabric and effluent samples.**

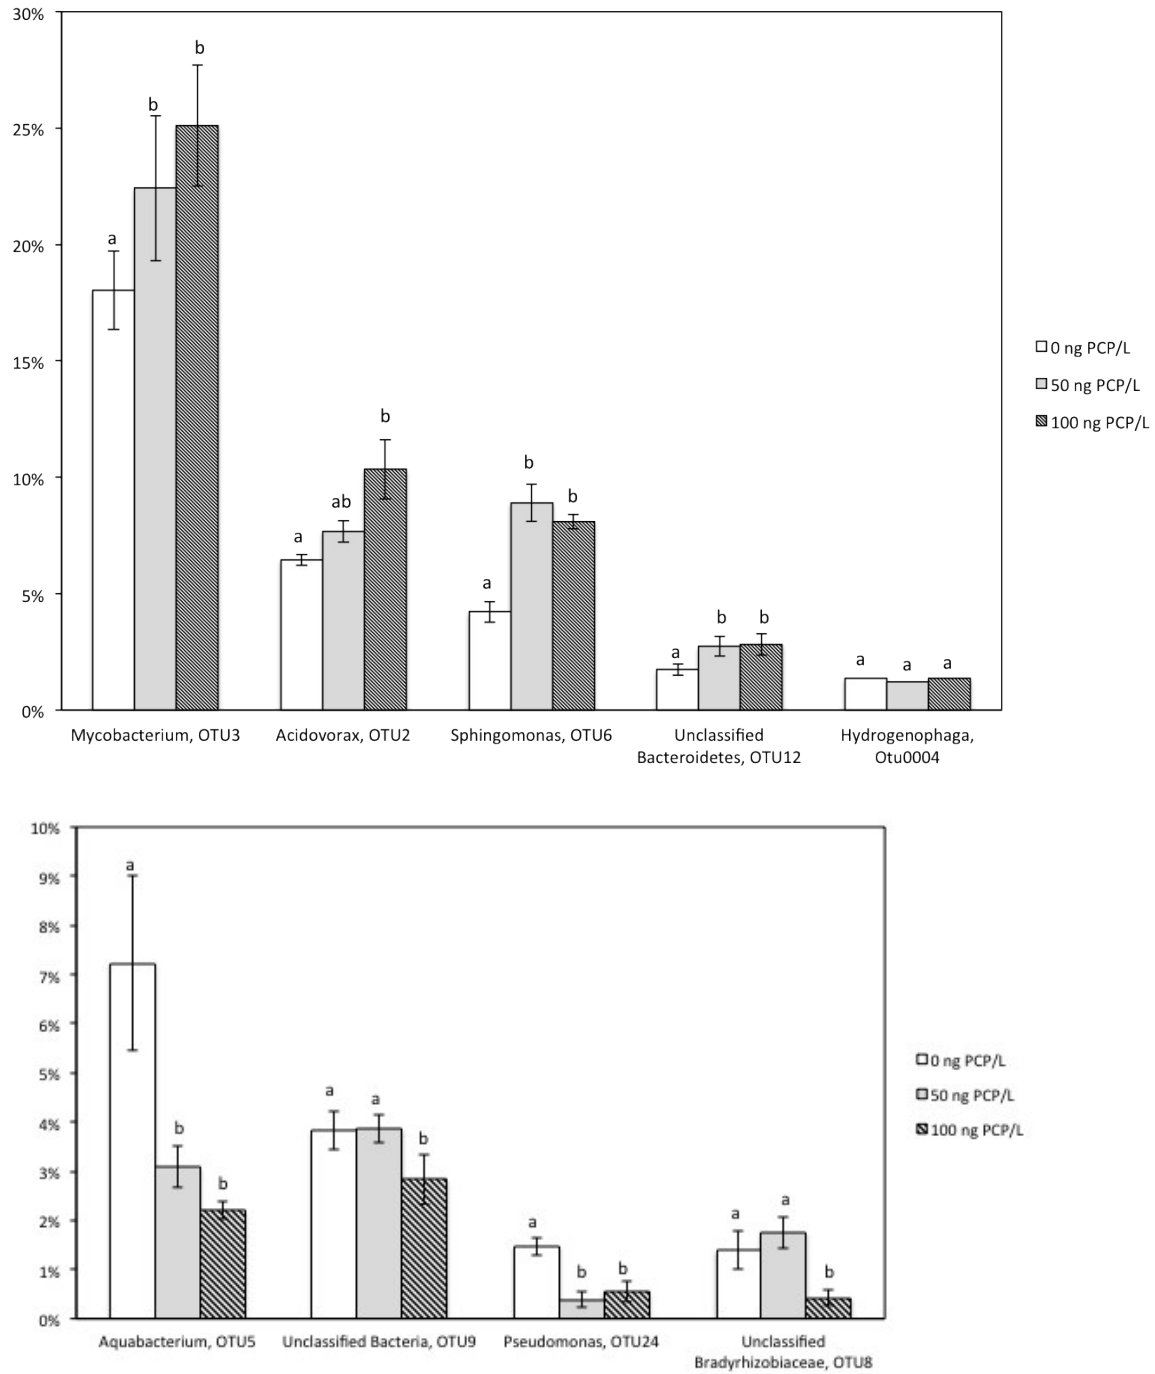

**Fig. S5.** Relative abundance (y-axis) versus specified taxa (x-axis) for dominant OTUs (>1% relative abundance) of fabric samples that were correlated with Weighted Unifrac based PCoA plot (PCoA 1, 54%; PCoA 2, 16%). Letter Groups with the same letters indicate significant differences ( $p < 0.05$ ) between PCP treatments based on Tukey's pairwise analysis. They are not significantly different from each other.

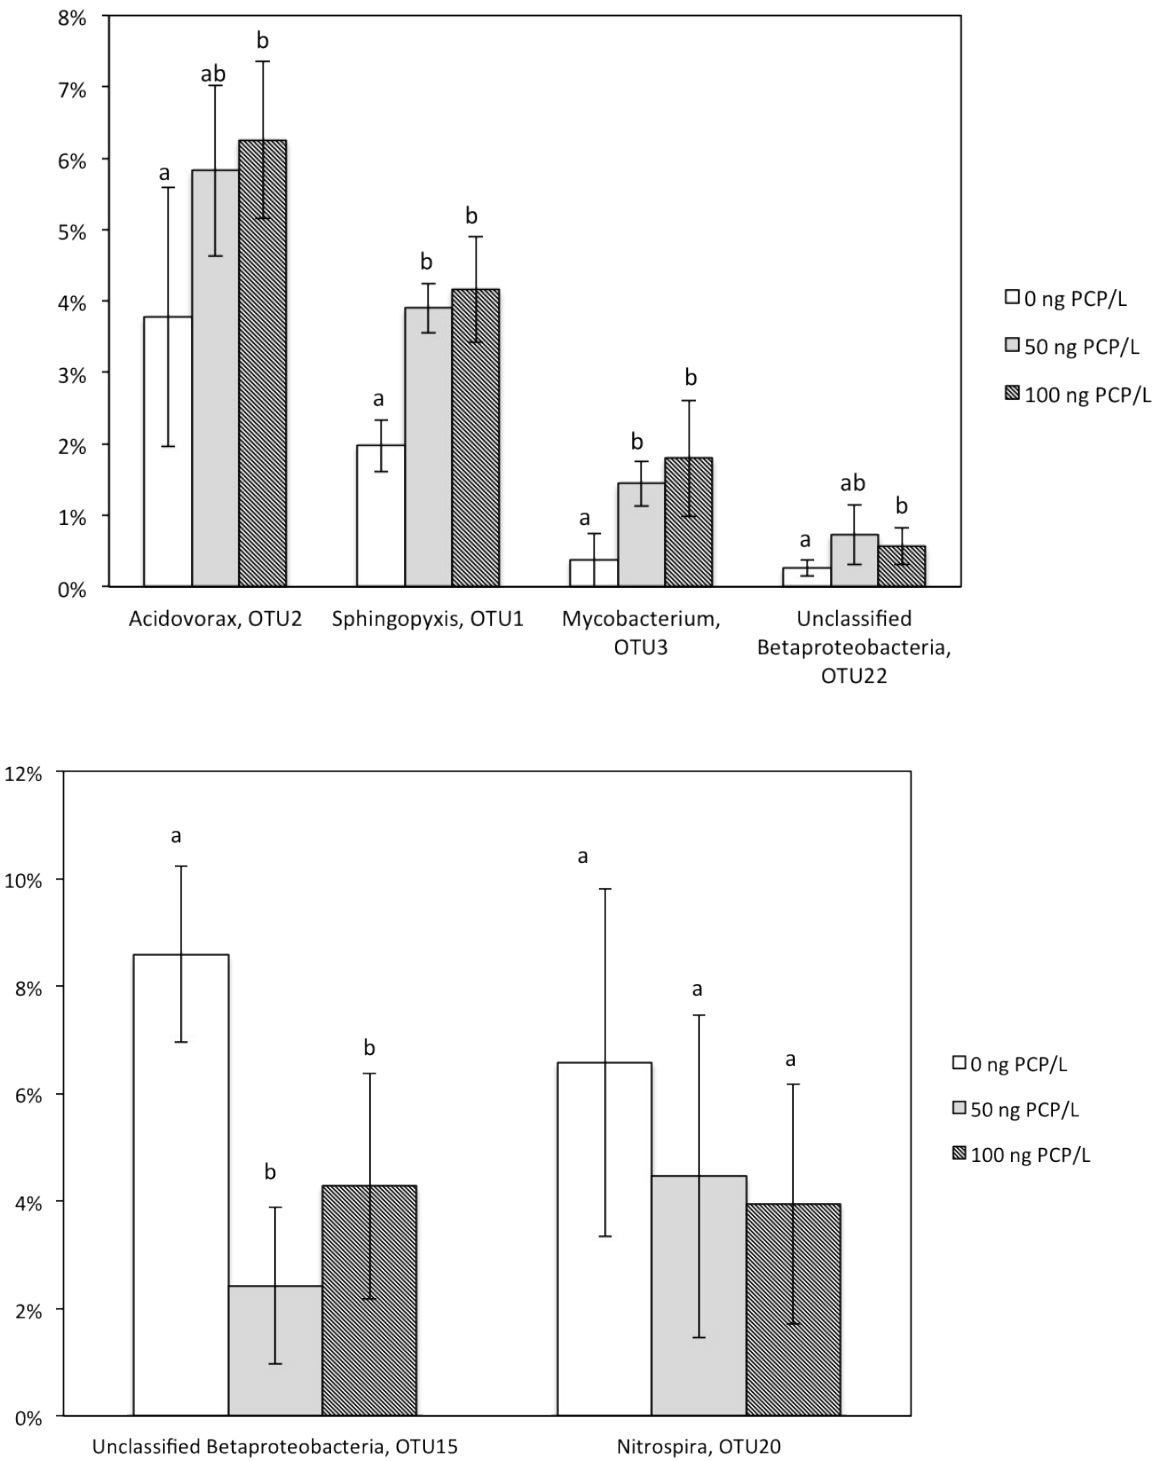

**Fig. S6.** Dominant OTUs (>1%) of effluent samples that were correlated with Weighted Unifrac based PCoA plot (PCoA 1, 30%; PCoA 2, 14%). Letters indicate whether significant differences ( $p < 0.05$ ) occur between PCP treatments based on Tukey's pairwise analysis. Bars with the same letter are not significantly different from each other.

### 13. Water Chemistry of PoU filter

#### 13.1 Influent and effluent pH measurements

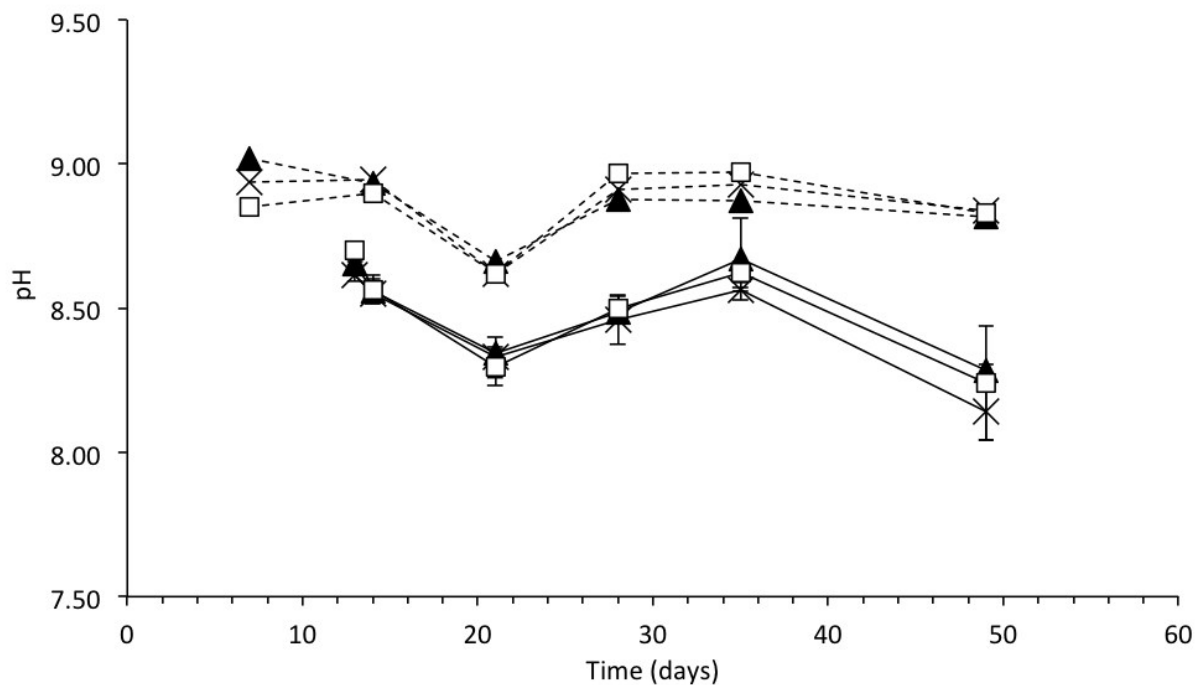

**Fig. S7.** pH measurements in influent (dashed line) and effluent samples (solid line) of PoU filters during operation. The PoU filters were fed with 0 ng PCP/L (cross), 50 ng PCP/L (triangle), or 100 ng PCP/L (square). Standard deviations of effluent samples are indicated by the error bars.

### 13.2 TOC

(a)

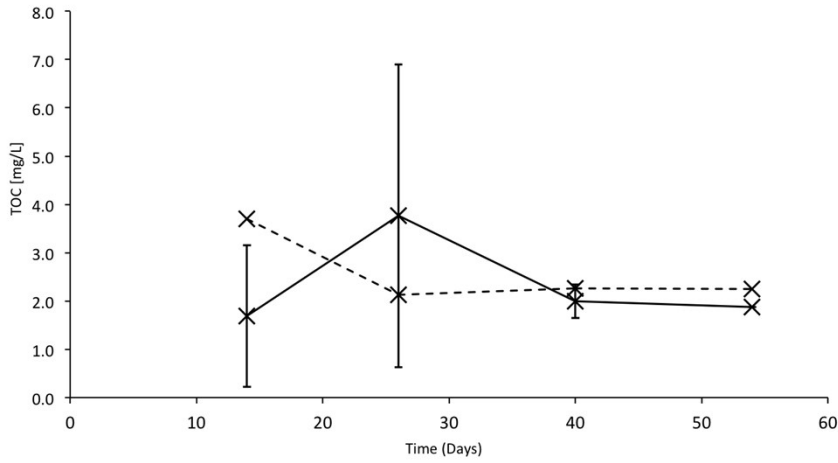

(b)

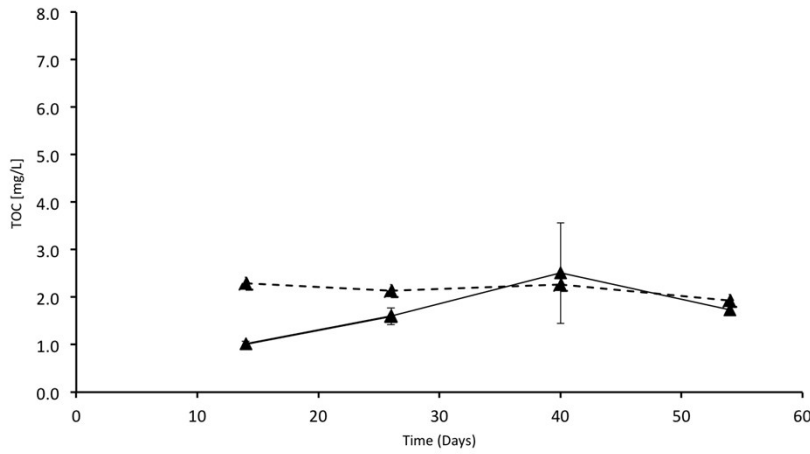

(c)

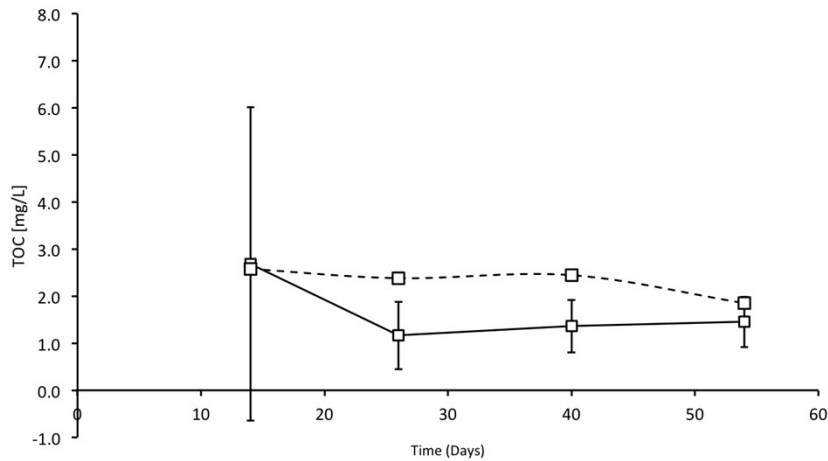

**Fig. S8.** TOC concentrations in influent (dashed line) and effluent samples (solid line) during operation. (a) 0 ng PCP/L (cross); (b) 50 ng PCP/L (triangle); and (c) 100 ng PCP/L (square). Standard deviations of effluent samples are indicated by the error bars.

### 13.3 Average water quality of all treatments in influent and effluent

**Table S10.** Average influent water quality of all treatments\*.

| Parameter                                                 | Avg. Conc.                                                                                |
|-----------------------------------------------------------|-------------------------------------------------------------------------------------------|
| pH                                                        | 8.86 (0.12)                                                                               |
| Total alkalinity (mg/L as CaCO <sub>3</sub> )             | 49.7 (9.5)                                                                                |
| Total Cl <sub>2</sub> residual (mg/L as Cl <sub>2</sub> ) | 2.5 (0.5)                                                                                 |
| TOC (mg/L as C)                                           | 2.3 (0.4)                                                                                 |
| DOC (mg/L as C)                                           | 2.2 (0.2)                                                                                 |
| SUVA (L mg <sup>-1</sup> cm <sup>-1</sup> )               | 0.016 (0.003)                                                                             |
| HPC (CFU/mL)                                              | 160 (250)                                                                                 |
| PCP (ng/L)                                                | Control: <10 ng/L<br>50 ng /L PCP treatment: 62 (10)<br>100 ng /L PCP treatment: 121 (13) |

\*Standard deviations are shown in parentheses

**Table S11.** Average effluent water quality of PoU Filters\*.

| Parameter                                                 | Treatment   |             |              |
|-----------------------------------------------------------|-------------|-------------|--------------|
|                                                           | 0 ng/L PCP  | 50 ng/L PCP | 100 ng/L PCP |
| pH                                                        | 8.45 (0.17) | 8.51 (0.16) | 8.41 (0.39)  |
| PCP (ng/L)                                                | < 10 ng/L   | < 10 ng/L   | < 10 ng/L    |
| Total Cl <sub>2</sub> residual (mg/L as Cl <sub>2</sub> ) | < 0.2 mg/L  | < 0.2 mg/L  | < 0.2 mg/L   |
| TOC (mg/L as C)                                           | 2. (1.66)   | 1.7 (0.7)   | 1.77 (1.55)  |

|              |                                         |                                         |                                         |
|--------------|-----------------------------------------|-----------------------------------------|-----------------------------------------|
| HPC (CFU/mL) | $1.1 \times 10^5$ ( $7.4 \times 10^4$ ) | $4.5 \times 10^4$ ( $3.1 \times 10^5$ ) | $1.6 \times 10^4$ ( $3.2 \times 10^4$ ) |
|--------------|-----------------------------------------|-----------------------------------------|-----------------------------------------|

---

\*Standard deviations are shown in the parenthesis

### 13.4 Estimation of the depth of penetration of PCP into activated carbon block

To determine the approximate penetration depth of PCP in the activated carbon block, the following assumptions were made. Biodegradation of PCP was neglected. Equilibrium adsorption of PCP by the activated carbon block was assumed to be modeled by a Freundlich isotherm. This is represented symbolically as follows:

$$\text{where } q_s(\text{mg/g GAC}) = K_F C_s^{1/n} \quad (\text{eq. S1})$$

$q_s$  is the PCP mass adsorbed on the solid phase,  $C_s$  is PCP concentration in aqueous phase,  $K_F$  and  $n$  are constants of the Freundlich isotherm model. Literature values of the constants  $K_F$  and  $n$  were reported by Dobb et al's<sup>2</sup> for Filtrasorb 300 granular activated carbon, which typically has a surface area of 1000 m<sup>2</sup>/g GAC.<sup>3</sup> At the pH conditions of Ann Arbor tap water, pH 9,  $K_F = 100 \text{ mg}^{1+n}\text{g}^{-1}\text{L}^{-n}$  and  $n=0.41$ , were chosen in this approximation.

Perfect mass transfer was assumed, i.e., all of the sorbed PCP was contained within a layer that was equilibrated with influent concentrations of PCP. Therefore,  $C_s$  was the PCP influent concentration, 50 or 100 ng/L. With these values and eq. S1, the adsorbed concentrations on the solid phase ( $q_s$ ) were calculated as 1.72 and 2.29 mg PCP/g Filtrasorb carbon, or  $1.72 \times 10^{-7}$  and  $2.29 \times 10^{-7}$  mg/cm<sup>2</sup> carbon, exposed to 50 and 100 ng/L PCP treatments. Since the specific area of activated carbon block was measured as 600 m<sup>2</sup>/g, the masses of PCP adsorbed per mass of activated carbon block were estimated to be 1.03 and 1.37 mg PCP/g ACB carbon for the 50 and 100 ng/L PCP treatments.

The depth of the PCP saturated zone was then estimated for the ACB at the end of filter operation by assuming all of the PCP fed to the filter was held in the saturated zone (and the PCP mass in the solution phase (void volume) was negligible). The following equations were used:

$$\begin{aligned} & \text{Mass of PCP – saturated carbon zone (g carbon)} \\ & = \frac{\text{The total PCP mass adsorbed (mg PCP)}}{\text{The mass PCP adsorbed on the activated carbon block (mg PCP/g carbon)}} \end{aligned} \quad (\text{e.q. S2})$$



$$\text{Volume of PCP – saturated carbon zone (cm}^3\text{)} = \frac{\text{Mass of saturated carbon zone (g carbon)}}{\text{The density of PCP of activated carbon block (g/cm}^3\text{)}} \quad (\text{e.q. S3})$$

The depth of PCP penetration into the ACB, is the difference of the outer radius of the ACB,  $R_0$  and the radius,  $R_1$ , to the inner edge of the PCP-saturated ACB volume (see Fig. 1). The latter dimension can be estimated by calculating the annulus area of the saturated zone,  $A$  as follows:

$$\text{Annulus area of saturated zone, } A \text{ (cm}^2\text{)} = \frac{\text{Volume of PCP – saturated carbon zone (cm}^3\text{)}}{\text{The hHeight of activated carbon block (cm)}} \quad (\text{e.q. S4})$$

$A$  is related to  $R_0$  and  $R_1$  by,

$$A = \pi R_0^2 - \pi R_1^2 \quad (\text{e.q. S5})$$

Therefore, the approximate PCP penetration depth =  $R_0 - R_1$  can be determined from eqs. S4 and S5.

At the end of filter operation, the total mass of PCP fed was 0.027 and 0.054 mg at 50 and 100 ng/L PCP treatment. The ACB density was measured as 0.19 g/cm<sup>3</sup>. The height and the outer radius of the activated carbon block ( $R_0$ ) were 5.9 and 2.5 cm, respectively. With these values, the area of the PCP-saturated zone was estimated to be 0.023 cm<sup>2</sup> in 50 ng/L PCP treatment, and 0.035 cm<sup>2</sup> in 100 ng/L PCP treatment. The depth of penetration of PCP into activated carbon block was estimated to be about 15 μm for 50 ng/L PCP treatment, and 22 μm with 100 ng/L PCP treatment.

#### 14. Estimation of cell protein obtained from the cell load in influents

If no cell growth occurred on the fabric, the bacterial cell mass that accumulated on the fabric would be equal to or less than (due to decay) the cell load from the influent of PoU filters over the period of operation. It was assumed that only 1% of cells are culturable using the HPC method.<sup>4</sup>

$$\begin{aligned} & \text{Cells applied to fabric} \\ &= \frac{\text{average influent conc (CFU/mL)} \times \text{volume of water processed (L)}}{1\% \text{ (culturability of HPC test)}} \end{aligned} \quad \text{(e.q. S6)}$$

Based on measured data, the average concentration of influent HPC was 160 CFU/mL (Table S10). The total volume of water processed was 519 L. Using these values and e.q. S6, the total number of cells applied to the fabric was estimated to be  $8.7 \times 10^9$  cells.

To convert the number of cells to protein from applied cells, it was assumed that all cells have the same dry weight as actively growing cell of *E.coli*,  $2.8 \times 10^{-13}$  g, where protein mass comprised 55% of total cell mass.<sup>5</sup> In addition, 25% of cells that grew over the course of the study were assumed to remain at the end (i.e., an observed yield of 0.25 g cell theoretical oxygen demand per g of electron donor as theoretical oxygen demand); the rest would have been lysed and cytoplasmic matter would have been recycled as food to other growing cells. Therefore, the protein mass expected on the fabric at the end of the study is estimated to be  $3.3 \times 10^{-4}$  g. Since the fabric area was  $94.2 \text{ cm}^2$ , the protein from applied cells per fabric area would be  $3.6 \text{ }\mu\text{g/cm}^2$ . This compares to average measured cell protein on the fabric of  $23 \text{ }\mu\text{g/cm}^2$ . The difference implies that substantial cell growth occurred on the fabric.

## 15. Estimation of cell protein formed from PCP utilization

### 15.1 Theoretical yield of PCP

The theoretical yield of PCP is calculated based on the stoichiometry of the redox reaction. It was assumed that the starting material was completely consumed and no side or reverse reactions occur. The balanced organic half-reaction for PCP is given in equation S7.

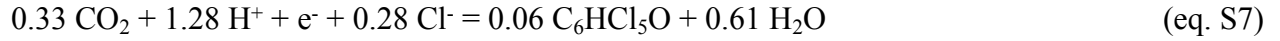

The amount of energy that can be acquired from the redox reaction is the difference in the Gibb's formation potential for the reactants and products. Based on the free energies of formation ( $G_f^0$ ) shown in Table S12, the standard free energy change of the reaction ( $\Delta G^0$ ) at 1 atm pressure and 1M concentration is:

$$\Delta G^0 = \sum G_f^0(\text{products}) - \sum G_f^0(\text{reactants}) = 13.58 \text{ kJ/mole} = 13.58 \text{ kJ/e} - eq$$

The standard free energy change of the reaction at pH 7 ( $\Delta G^0$ ) is calculated to be

$\Delta G^0 = \Delta G^0 + m\Delta G_f^0(\text{H}^+) = -35.91 \text{ kJ/e} - eq$ . The theoretical yield ( $f_s^0$ ) of PCP is estimated thermodynamically by the fraction of electron donor, A (eq. S8 and S9). It was assumed that ammonia is the nitrogen source and is available for cell synthesis. The efficiency of energy transfer,  $\epsilon$ , was assumed to be 0.6. n is +1 if  $\Delta G_p$  is positive, and vice versa.

$$A = - \frac{\frac{\Delta G_p}{\epsilon^n} + \frac{\Delta G_{\text{pyruvate}}}{\epsilon}}{\epsilon(\Delta G_a^{o'} - \Delta G_d^{o'})} \quad (\text{eq. S8})$$

$$f_s^0 = \frac{1}{1 + A} \quad (\text{eq. S9})$$

$\Delta G_p$  is the energy required to convert the cell carbon source to an intermediate stage. It is calculated by subtracting the amount of energy that can be formed from the PCP redox reaction ( $\Delta G^0$ ) from the free energy of formation of pyruvate (Table S12) as follows:

$$\Delta G_p = 35.09 - \Delta G^0 = 72.49 \text{ kJ/e} - eq$$

$\Delta G_a$  and  $\Delta G_d$  are the free energies per electron equivalent for oxidation half reactions for the electron acceptor and electron donor, respectively. Oxygen is the electron acceptor because we assumed the water is saturated throughout the PoU filter and the biofilm thickness during operating periods is not sufficient to cause anaerobic zones. As a minimum, this is a conservative estimate and will overestimate cell yield from PCP growth.  $\Delta G_d$  is equal to  $\Delta G^{\circ}$  since PCP is assumed to be the electron donor in this calculation. With the calculated  $\Delta G^{\circ}$ , the values shown in Table S12, eq. S8 and S9, the theoretical yield of PCP ( $f_s^{\circ}$ ) is calculated at 0.14.

### **15.2 Theoretical oxygen demand of PCP on PCP-fed fabric membranes**

In order to determine the biomass that can be formed on the fabric due to growth on PCP, it was assumed that all of the PCP applied to the filter system adsorbed on the activated carbon block ( $2.8 \times 10^{-4}$  and  $5.7 \times 10^{-4}$  mg PCP/cm<sup>2</sup> in 50 and 100 ng/L PCP-fed filters, respectively) and was all utilized by the biomass (to obtain the most conservative estimate). Based on the theoretical oxygen demand (ThOD) of PCP, which is 0.54 mg ThOD/mg PCP, the PCP adsorbed on the activated carbon block contained  $1.5 \times 10^{-4}$  and  $3.1 \times 10^{-4}$  mg ThOD/cm<sup>2</sup> for 50 and 100 ng/L PCP fed-fabrics, respectively.

### **15.3 Theoretical cell biomass and cell protein yielded from PCP utilization**

The biomass that can be yielded from the PCP is the product of the theoretical yield ( $f_s^{\circ}$ ) and the theoretical oxygen demand (ThOD) provided by the substrate. Thus, the amount of biomass that could grow on PCP was calculated to be  $2.2 \times 10^{-5}$  and  $4.3 \times 10^{-5}$  mg biomass as ThOD/cm<sup>2</sup> for 50 and 100 ng/L PCP fed-fabrics, respectively. Since cell protein comprises 55% of a prokaryotic cell by weight,<sup>5</sup> the cell protein yields are thus  $1.2 \times 10^{-2}$  and  $2.5 \times 10^{-2}$   $\mu$ g cell protein/cm<sup>2</sup> for 50 and 100 ng/L PCP fed-fabrics, respectively. This is three orders of magnitude lower than the actual measured amount of biomass on the fabric, and indicates that under the conservative assumptions used in this estimate, PCP was not a major contributor to cell growth.

**Table S12.** The free energies of formation ( $G_f^\theta$ ) for the compounds at 25 °C, 1 atm and 1M concentration.

| Compound                                    | $G_f^\theta$                |
|---------------------------------------------|-----------------------------|
| C <sub>6</sub> HCl <sub>5</sub> O (at pH 0) | -144.8 kJ/mol <sup>6</sup>  |
| H <sub>2</sub> O (at pH 0)                  | -237.17 kJ/mol <sup>7</sup> |
| CO <sub>2</sub> (at pH 0)                   | -394.4 kJ/mol <sup>7</sup>  |
| H <sup>+</sup> (at pH 0)                    | 0 kJ/mol <sup>7</sup>       |
| Cl <sup>-</sup> (at pH 0)                   | -131.4 kJ/mol <sup>8</sup>  |
| H <sup>+</sup> (at pH 7)                    | -39.83 kJ/mol <sup>7</sup>  |
| Pyruvate (at pH 7)                          | 35.09 kJ/e-eq <sup>9</sup>  |
| O <sub>2</sub> (at pH 7)                    | -78.72 kJ/e-eq <sup>9</sup> |

## 15. Supplemental references

- 1 G. A. O'Toole, *J. Visualized Exp.*, 2011, **47**, 1–3.
- 2 R. A. Dobbs and J. M. Cohen, *Carbon Adsorption Isotherms for Toxic Organics*, Cincinnati, 1980.
- 3 D. W. Hendricks, *Water Treatment Unit Processes: Physical and Chemical*, CRC Press, Boca Raton, 2006.
- 4 J. Bartram, J. Cotruvo, M. Exner, C. Fricker and A. Glasmacher, Eds., in *Heterotrophic plate counts and drinking-water safety*, IWA Publishing on behalf of the World Health Organization, London, 2003, p. 15.
- 5 F. C. Neidhardt, R. I. Curtiss, J. L. Ingraham, E. C. C. Lin, K. B. Low, B. Magasanik, W. S. Reznikoff, M. Riley, M. Schaechter and H. E. Umbarger, *Escherichia coli and Salmonella Cellular and Molecular Biology Volume I, Second edition*, ASM Press, Washington, D. C., 1996.
- 6 J. Dolfing and B. K. Harrison, *Environ. Sci. Technol.*, 1992, **26**, 2213–2218.
- 7 M. T. Madigan, J. M. Martinko, D. A. Stahl; and David P. Clark., *Brock Biology of Microorganisms, thirteenth ed.*, Pearson Education, San Francisco, 2010.
- 8 E. H. Oelkers, H. C. Helgeson, E. L. Shock, D. A. Sverjensky, J. W. Johnson and V. A. Pokrovskii, *J. Phys. Chem. Ref. Data*, 1995, **24**, 1401.
- 9 C. P. L. Grady Jr., G. T. Daigger, N. G. Love and C. D. M. Filipe, *Biological Wastewater Treatment, third ed.*, CRC Press, Boca Raton, 2011.
