# Supplementary material for: The microbial colonization of activated carbon block point-of-use (PoU) filters with and without chlorinated phenol disinfection by-products
Source: Royal Society of Chemistry journal article supplement (doi:10.1039/c7ew00134g), 2017-01-01
Supplement: c7ew00134g2.xlsx [file c7ew00134g2.xlsx]

## Sheet: Relative abundance
Table S7. All taxa observed were taken from influent (Infl), effluent (Effl) DNA samples collected from different operation days, and fabirc (F) DNA replicates. Values represent abundance of each taxon as a percentage of all sequences obtained for each individual sample.
Refer to the Table S9 for the interpretation of the sample code
OTU number	Taxonomy	Sample code
		11Infl2	11Infl3	12Infl1	12Infl2	12Infl3	15Infl1	15Infl2	15Infl3	30Infl3	F1A1	F1A2	F1A3	F1A4	F1B1	F1B2	F1B3	F1B4	F2A1	F2A2	F2A3	F2A4	F2B1	F2B2	F2B3	F2B4	F3A1	F3A2	F3A3	F3A4	F3B1	F3B2	F3B3	F3B4	11Effl1B	11Effl2A	11Effl2B	11Effl3B	12Effl1A	12Effl1B	12Effl2A	12Effl2B	12Effl3A	12Effl3B	15Effl1A	15Effl1B	15Effl2A	15Effl2B	15Effl3A
Otu0001	Sphingopyxis	0.00329782	0.00340705	0.00194472	0.00185259	0.00336852	0.00606964	0.00574506	0.00347618	0.00768501	0.214367	0.215149	0.214456	0.220759	0.205929	0.238694	0.217113	0.225486	0.225338	0.220819	0.25682	0.261492	0.224835	0.215274	0.208396	0.214907	0.242136	0.225312	0.241316	0.236192	0.234626	0.25057	0.242537	0.230657	0.0173976	0.0424832	0.035508	0.0471233	0.0145445	0.0232848	0.0432517	0.035145	0.0327204	0.0497224	0.0219662	0.0215343	0.0398832	0.0377485	0.0381028
Otu0002	Acidovorax	0.0219009	0.0199044	0.0157346	0.0185259	0.0202111	0.0224577	0.018851	0.017231	0.0250949	0.0628976	0.0655313	0.0649385	0.0599649	0.0639387	0.064997	0.0676535	0.0663902	0.0754461	0.0735504	0.0801506	0.0853204	0.0742324	0.0730717	0.0721846	0.0799592	0.1023	0.11054	0.121792	0.118535	0.101948	0.089798	0.0881362	0.0941206	0.0547317	0.0570134	0.0619114	0.065137	0.0315654	0.0586217	0.0724336	0.0683579	0.0679401	0.0754544	0.016865	0.0268589	0.0497661	0.0402009	0.046863
Otu0003	Mycobacterium	0.0307796	0.190735	0.0130237	0.178245	0.0362677	0.00601446	0.00412926	0.00785136	0.0530361	0.17796	0.175421	0.163932	0.154317	0.20352	0.176891	0.190757	0.199326	0.21172	0.211692	0.180384	0.186732	0.24888	0.24073	0.265738	0.248221	0.28622	0.241065	0.24815	0.22727	0.218438	0.239998	0.25696	0.291402	0.0100404	0.00932886	0.0116368	0.0238356	0.00094038	0.00303582	0.0160741	0.0165002	0.0135676	0.0303037	0.000694035	0.00386391	0.0166708	0.0164073	0.00788138
Otu0004	Hydrogenophaga	0.179858	0.130066	0.187931	0.14384	0.174714	0.107819	0.0895871	0.0959245	0.170683	0.0159854	0.0128876	0.0130347	0.0137426	0.012521	0.0122186	0.0142453	0.0137974	0.0123915	0.00627152	0.0123979	0.013201	0.0141806	0.0120647	0.0130123	0.0124854	0.0150708	0.0144604	0.0108323	0.0137087	0.0133558	0.0104535	0.0174972	0.0133131	0.291431	0.233054	0.228071	0.217671	0.201617	0.205556	0.169159	0.157756	0.194053	0.160967	0.14311	0.162756	0.124327	0.124077	0.16514
Otu0005	Aquabacterium	0.0290884	0.0312612	0.0287583	0.0267963	0.0390748	0.0297412	0.0297127	0.0273899	0.043833	0.081134	0.0860998	0.0922408	0.0944122	0.0548599	0.0559217	0.0586052	0.0553058	0.0299784	0.0329255	0.0351956	0.0376855	0.0300875	0.0287541	0.0271389	0.0252334	0.0221832	0.0213379	0.0200482	0.02467	0.0243389	0.0203568	0.0208961	0.022075	0.0223601	0.0369463	0.0358779	0.0299315	0.0518776	0.0272313	0.038682	0.0334061	0.0143582	0.0360292	0.0524343	0.0265291	0.0207857	0.0319972	0.00586851
Otu0006	Sphingomonas	0.00498901	0.00107591	0.00182686	0.000727802	0.00213339	0.00193125	0.00368043	0.0029967	0.00132827	0.0496852	0.0431506	0.0423627	0.0377467	0.0375629	0.0421314	0.046912	0.0381366	0.0890639	0.10698	0.0833269	0.0824857	0.0871799	0.093099	0.0830481	0.0879522	0.0768893	0.0833823	0.0802495	0.0837535	0.0802495	0.0799733	0.0853284	0.0771541	0.00377957	0.00171141	0.00108117	0.0014726	9.4038e-05	0.000758956	0.00144306	0.00158433	0.00114764	0.00150212	0	0.00155499	0.000668238	0.0016057	0.00138916
Otu0007	Unclassified Proteobacteria	0	0.00041841	0.00058931	0.00112478	0.00842129	0.000551785	0.00224417	0.00410548	0.0135199	9.78697e-05	0.000690409	0.000822006	0.00012108	0.000430274	0.000659096	0.000417614	0.000387567	0.00106489	0.000475964	0.00138323	0.00186204	0.00102758	0.000884742	0.00147234	0.0012252	0.000595313	0.00170468	0.00141784	0.00141619	0.0031763	0.000943174	0.000591121	0.00145515	0.299827	0.274027	0.293026	0.276918	0.301548	0.275197	0.27338	0.342756	0.31991	0.22042	0.320679	0.322166	0.306721	0.359677	0.372098
Otu0008	Unclassified Bradyrhizobiaceae	0.00600372	0.00268978	0.00400731	0.00264655	0.00269481	0.00568339	0.0040395	0.0029967	0.00597723	0.00812319	0.0107589	0.0111558	0.0118961	0.0162213	0.0196715	0.0167974	0.0163166	0.02275	0.0188986	0.0192372	0.0199544	0.0140573	0.0162873	0.0137286	0.0152567	0.00234992	0.00411474	0.00371473	0.00461678	0.00730933	0.00514816	0.00331028	0.0033128	0.00851125	0.0250671	0.0265172	0.00821918	0.00811861	0.0106254	0.0332705	0.0212918	0.0132616	0.00511592	0.00930007	0.0106022	0.0212429	0.0232972	0.0114535
Otu0009	Unclassified Bacteria	0.00803315	0.00322773	0.00548058	0.00258039	0.00359308	0.00816642	0.0045781	0.00494456	0.00640417	0.0453789	0.0423739	0.0386343	0.0388364	0.0336474	0.0372642	0.0345692	0.0355011	0.0428216	0.0416888	0.0402674	0.0387694	0.0359653	0.0339821	0.0371269	0.0383314	0.0248778	0.0299201	0.0335177	0.0293435	0.0346332	0.0302209	0.0191819	0.0252639	0.0693306	0.0934228	0.0689106	0.0793151	0.0735064	0.0857013	0.0627731	0.0753135	0.117391	0.0823555	0.0953604	0.0957497	0.105441	0.0926342	0.112721
Otu0010	Unclassified Betaproteobacteria	0.0487908	0.0494919	0.0413696	0.0412201	0.0351448	0.0505987	0.044614	0.0406653	0.056167	0.00482824	0.00537944	0.00628248	0.00502482	0.00425971	0.00542486	0.0060786	0.00685993	0.00448546	0.00433967	0.00694178	0.00603079	0.0051379	0.00659535	0.00533227	0.00402567	0.0056398	0.00564308	0.0039983	0.00662777	0.00570204	0.0071131	0.00109357	0.00656367	0.00447201	0.0033557	0.0044385	0.0211986	0.0128205	0.00613236	0.00260552	0.00187414	0.00178521	0.0255361	0.00773849	0.00659693	0.00355221	0.00315301	0.00187112
Otu0011	Bosea	0.00879418	0.0127316	0.0150863	0.0127035	0.0115652	0.0121393	0.00709156	0.00991909	0.0152277	0.0119727	0.0134054	0.00992279	0.0109577	0.0183727	0.0192152	0.017679	0.0139912	0.0104231	0.00767142	0.0111171	0.0128953	0.010769	0.0115419	0.0091922	0.00878063	0.0112483	0.0109335	0.010492	0.00946015	0.0149631	0.0162304	0.0191819	0.00987647	0.0326313	0.0766779	0.0945742	0.052226	0.0250768	0.0250152	0.0478214	0.0409606	0.0289715	0.0473713	0.0459451	0.0427858	0.0342208	0.0326395	0.0252885
Otu0012	Unclassified Bacteroidetes	0.0185185	0.0610879	0.0318817	0.0522694	0.0178531	0.113006	0.0975763	0.105184	0.0308349	0.0199328	0.0151027	0.0132695	0.0180712	0.0206101	0.0161732	0.0185142	0.0179831	0.0308497	0.0189266	0.0299188	0.026541	0.0235932	0.0308453	0.0289694	0.0296091	0.0208986	0.0278921	0.0270807	0.0353198	0.0262523	0.0270769	0.0346397	0.0270597	0	0	0	0	0	0	0	0	0	8.70796e-05	0	0	0	0.00064228	0.000737108
Otu0013	Unclassified Rhodobacteraceae	0.0189413	0.0223551	0.0343568	0.0195845	0.0234673	0.021023	0.0212747	0.0228349	0.0259013	0.00414315	0.00212876	0.00302381	0.00111999	0.00197926	0.00223078	0.0029233	0.00251918	0.00509858	0.00425568	0.00476447	0.00480796	0.00357598	0.00394112	0.00489455	0.00306301	0.00535781	0.00270397	0.00632355	0.00521158	0.00524282	0.00585554	0.00744813	0.00380817	0.018869	0.017953	0.0173272	0.0264384	0.0179926	0.0229812	0.0226079	0.0192631	0.0299406	0.0271471	0.011868	0.022995	0.0223332	0.0209617	0.0338503
Otu0014	Unclassified Sphingomonadaceae	0	0.000537956	0.000176793	0	0.000561419	0.00242785	0	0.000359604	0.000806452	0.0564056	0.0608711	0.0654082	0.0658675	0.056538	0.055871	0.0572595	0.0527091	0.0114557	0.0145029	0.0136786	0.0110333	0.0124132	0.0122657	0.0097493	0.0130397	0.00140995	0.000911122	0.00113427	0.00124625	0.000880181	0.00188635	0.00206892	0.00195052	0.0121466	0.00241611	0.00156486	0.000547945	0.00786785	0.0189435	0.00737564	0.00701354	0.000306037	0.000740176	0.00475414	0.0192725	0.020223	0.0074738	0.000878859
Otu0015	Unclassified Betaproteobacteria	0.00135295	0.000896593	0.00194472	0.00205108	0.00314395	0.00143464	0.00233393	0.00140845	0.00365275	0.000293609	0.000115068	0.000205502	9.081e-05	8.60548e-05	0.000101399	0.000139205	0.00023254	0.000129078	0	0.000333	0.000138958	0.000246619	8.04311e-05	7.95862e-05	0	0	0	5.67135e-05	0.000283238	0.000267881	0.000432288	0	9.28821e-05	0.0610502	0.00506711	0.0217657	0.0268151	0.0993668	0.0867638	0.0186796	0.0399559	0.0232078	0.0596277	0.101537	0.0809537	0.0167411	0.0431203	0.0415332
Otu0016	Unclassified Burkholderiales	0.0226619	0.018948	0.0153221	0.0166071	0.0169549	0.0130221	0.0141831	0.0115373	0.0196395	0.00342544	0.0027904	0.00246602	0.00402591	0.00197926	0.00380247	0.0030625	0.00220913	0.00122624	0.00159588	0.00181869	0.00183425	0.00189075	0.00172927	0.00214883	0.00274212	0.00238125	0.00182224	0.00195661	0.00201099	0.00206651	0.00227934	0.00189159	0.000712096	0.000519331	0.000604027	0.000682846	0.000547945	0.000219422	0.000212508	0.00056119	0.0003671	0.000204024	0.00102318	0.000347017	9.42418e-05	0	0.001051	0.000737108
Otu0017	Unclassified Rhizobiales	0.00152207	0.000179319	0.000707172	0.00119095	0.00426679	0.000496607	0.000897666	0.00119868	0.00237192	0.00658989	0.00615615	0.00657605	0.0072648	0.0134246	0.0110525	0.0112756	0.0110457	0.0172642	0.0171627	0.0125772	0.0124785	0.00822064	0.00635406	0.00652606	0.00694282	0.0048565	0.00329179	0.00354459	0.00334221	0.00432437	0.00550185	0.00496542	0.00439642	0.00983843	0.00979866	0.002959	0.00380137	0.00840073	0.0128112	0.0190805	0.0072454	0.00520262	0.00820725	0.0230073	0.0200735	0.0397777	0.0100721	0.00671902
Otu0018	Unclassified Comamonadaceae	0	0	0	0	0	0	0	0	0	0.000782958	0.000863011	0.000381646	0.00057513	0.00133385	0.000912594	0.00148485	0.00011627	0.0011617	0.000475964	7.68462e-05	0.00108388	0.00197295	0.00100539	0.000955034	0.00105018	0.000626645	0.00208676	0.00269389	0.000141619	0.000114806	0.000392989	2.95561e-05	3.09607e-05	0.000115407	0.000201342	0.000199164	0.000171233	0.000188076	0	0.00056119	0.00017389	0.000178521	0	0	0	0.000140682	0.000233556	0.000170102
Otu0019	Unclassified Bacteroidetes	0.0428716	0.0532576	0.0584595	0.0400291	0.037166	0.0908238	0.0910233	0.115133	0.0413188	0.0264574	0.0216041	0.0261281	0.0196452	0.0277527	0.0208376	0.0236184	0.0231765	0.029817	0.0230702	0.0249238	0.0237619	0.0295943	0.0312877	0.0247911	0.0319428	0.0217132	0.0399424	0.0262016	0.0297117	0.0310359	0.0303781	0.0139505	0.0293198	0	0	0	6.84932e-05	0	3.03582e-05	0	0	0	2.17699e-05	0	0	0	0	2.83503e-05
Otu0020	Nitrospira	0.00363606	0.00167364	0.00648241	0.00370517	0.00303166	0.0043591	0.00439856	0.00578364	0.00308349	0.00153329	0.00362465	0.00384582	0.00556968	0.00365733	0.00334618	0.0029233	0.00286799	0.00238794	0.00176387	0.0028177	0.002001	0.00189075	0.00209121	0.001154	0.00215869	0	0.00120503	0.00241032	0.00354047	0.00198997	0.00216144	0.00138914	0.000526332	0.00923254	0.00768456	0.00725524	0.0120548	0.081625	0.0721008	0.0678639	0.0467956	0.0454464	0.0474148	0.0757192	0.0900952	0.0706222	0.0672058	0.0359765
Otu0021	Unclassified Betaproteobacteria	0.00431253	0.0101614	0.00942896	0.00893212	0.00538962	0.0134084	0.0172352	0.0187594	0.00626186	0.0036538	0.00696162	0.00877785	0.00771885	0.00516329	0.00725005	0.00686743	0.00623983	0.00548582	0.0078394	0.00509747	0.00839309	0.00460356	0.00571061	0.00425786	0.00437573	0.0145068	0.00905243	0.00371473	0.005948	0.00516628	0.00558044	0.00933972	0.00538716	0.00366417	0.00869128	0.00315816	0.00414384	0.00169268	0.00343048	0.00645368	0.00372896	0.00311137	0.00581256	0.00315786	0.0011309	0.0146661	0.00656877	0.00280668
Otu0022	Unclassified Betaproteobacteria	0.00744123	0.00711297	0.00771996	0.00853513	0.00505277	0.00971142	0.00682226	0.0080012	0.00811195	0.00104394	0.00106438	0.00108622	0.00081729	0.00111871	0.000963293	0.000974433	0.00081389	0.000968085	0.000755943	0.00140885	0.000805959	0.00135641	0.000924958	0.00107441	0.000175029	0.000250658	0.000646602	0.00116263	0.00104798	0.000918449	0.000982473	8.86682e-05	0.000278646	5.77034e-05	0.000436242	0.000625942	0.000890411	0.000219422	3.03582e-05	0.00056119	0.000270495	0.000229527	0.000783716	0	0.000235605	0.000281363	0.000262751	0.000255153
Otu0023	Unclassified Bacteria	0.071791	0.0536163	0.0114915	0.0849543	0.0897148	0.0269823	0.0387792	0.0224453	0.0189753	0	0.000345205	0.000968793	0.00066594	0.000602384	0.000912594	0.000835228	0.000658864	0.0011617	0	2.56154e-05	0.00050025	0.000780961	0.00036194	0.000875448	0.00096266	0.00294523	0.000705384	0.000964129	0.00243585	0.00206651	0.000589484	0.00611811	0.000681136	5.77034e-05	6.71141e-05	0	6.84932e-05	0	0	0	9.66053e-05	2.5503e-05	0.000370088	0	0	0	0	0.000141751
Otu0024	Pseudomonas	0.0143751	0.0137478	0.0317638	0.0159455	0.0209971	0.0108702	0.0181329	0.0134852	0.0182638	0.0156918	0.0146424	0.0179961	0.0142874	0.0154899	0.0126749	0.0146165	0.0122471	0.00316241	0.0078954	0.00302262	0.00344617	0.00349377	0.00402156	0.00306407	0.00309218	0.00570247	0.00790618	0.00603998	0.00895032	0.00413302	0.00408709	0.00404918	0.00325087	0.00724178	0.000369128	0.000853558	0.00534247	0.00322864	0.00816636	0.00048102	0.000444384	0.0105328	0.0083161	0.000971649	0.000801056	0	5.8389e-05	0.00629377
Otu0025	Sediminibacterium	0.00304414	0.00502092	0.00335907	0.00681487	0.00291938	0.00430392	0.00332136	0.00494456	0.00588235	0.000880827	0.00158219	0.00155594	0.00233079	0.00107569	0.000506997	0.00167046	0.00178281	0.00325922	0.00503962	0.00394477	0.00280696	0.0025895	0.00197056	0.00191007	0.00192532	9.39967e-05	0.00173407	0.00263718	0.000963009	0.0031763	0.00184705	0.000650233	0.000154804	0.00164455	0.00442953	0.00651549	0.00434932	0.00144192	0.002034	0.00681445	0.00618274	0.00290735	0.0042669	0.00388659	0.000989539	0.000562726	0.0108312	0.00691747
Otu0026	Unclassified Betaproteobacteria	0.00388973	0.0100418	0.00559844	0.00999074	0.00808444	0.00601446	0.00502693	0.00377585	0.00944023	0.000260986	0.00123698	0.00114494	0.00115026	0.00150596	0.000760495	0.00167046	0.00147275	0.000839007	0.000755943	0.00158816	0.00141738	0.000986477	0.00132711	0.00135296	0.000495916	0.00119063	0.00158711	0.000935772	0.00124625	0.00110979	0.00137546	0.000384229	0.00445834	0.000375072	0.000234899	0.000455231	0.000582192	0.000219422	0.000182149	0.00064136	0.0003671	0.00025503	0.000827256	0.000242912	4.71209e-05	0	0.000291945	8.50509e-05
Otu0027	Unclassified Rhodocyclaceae	0.000253678	0.000119546	0.000412517	0.000330819	0	0.000165536	0.000987433	0.00050944	0.000616698	0.00163116	0.00256027	0.00278895	0.00142269	0.00296889	0.00309268	0.00273769	0.00298426	0.00141986	0.00285578	0.00215169	0.00163971	0.00172633	0.00229229	0.00191007	0.00107935	0.000532648	0.000558429	0.00150291	0.000963009	0.00110979	0.00204354	0.000857126	0.00151707	0.00320254	0.00124161	0.00401172	0.00219178	0.0031346	0.00306618	0.00224476	0.00452113	0.00270332	0.00394035	0.00124926	0.00122514	0.000175852	0.00181006	0.000425254
Otu0028	Chryseobacterium	0.00143751	0	0.000235724	0	0	5.51785e-05	0.000718133	0	0	0.0488044	0.042604	0.0437718	0.0485834	0.0371327	0.0407118	0.0452879	0.045074	0	0	0	0	0	0	0	0	0	0	0	0	0.000114806	0	0	0	0.000952106	0	0	0	0.00125384	0.000819672	0	0	0	0	0	0.0040524	0	0	0
Otu0029	Unclassified Hyphomicrobiaceae	0.00338238	0.000896593	0.000707172	0.00125711	0.00213339	0.00132428	0.0005386	0.00116871	0.00241935	0.00342544	0.000834244	0.00184951	0.00111999	0.00133385	0.00126749	0.000974433	0.00131773	0.00164575	0.0026878	0.00110146	0.00113946	0.00189075	0.00148798	0.00123359	0.00198366	0.000626645	0.000793557	0.00144619	0.0017844	0.000880181	0.00153266	0.000561565	0.00266262	0.00147144	0.000805369	0.00110963	0.0015411	0.00131653	0.00163934	0.000601275	0.000695558	0.000459055	0.000653097	0.0040254	0.00150787	7.03408e-05	0.00175167	0.00093556
Otu0030	Brevundimonas	0.0366142	0.0351464	0.0441393	0.0333466	0.0234673	0.0594824	0.0427289	0.0521426	0.0356736	0.00658989	0.00802601	0.0079852	0.00850587	0.00813218	0.00567836	0.00561459	0.00554221	0.00532447	0.00372372	0.00484131	0.00650325	0.00563114	0.00486608	0.0063271	0.00434656	0.00911768	0.0055549	0.00859209	0.0070243	0.00642915	0.00581624	0.00786191	0.00770922	0.00279862	0.00291946	0.00307281	0.00390411	0.00316595	0.00367335	0.00424901	0.00363236	0.0033154	0.00570371	0.00294965	0.00296862	0.00362255	0.00338656	0.00167267
Otu0031	Methylobacterium	0.000169119	0	0	0	0	0.000165536	0.000718133	8.99011e-05	4.74383e-05	0.000326232	0.000661642	0.00120365	0.00069621	0.00017211	0.000659096	0.000417614	0.00034881	0.00661525	0.00971526	0.00537924	0.00639208	0.00867278	0.011944	0.0137286	0.00647608	0	0.000470256	0.000198497	0.000651447	0.000153075	0.000510886	0	0.00170284	0	0.000134228	0.000369875	6.84932e-05	0	0.000151791	0.000601275	0.0007342	0.000102012	0.000195929	0	0	0	0.000467112	0.000113401
Otu0032	Unclassified Proteobacteria	0.00346694	0.00161387	0.00441982	0.0047638	0.00449135	0.00606964	0.00439856	0.005454	0.00479127	0	0	5.87147e-05	0	0.000387247	0.000456297	0.000417614	0	0.000193617	0	0.000358616	0.000138958	0.000287722	0.000201078	0.000119379	0	0	0.000235128	0.000141784	0	0.000344419	0.000196495	0	6.19214e-05	0.00034622	6.71141e-05	0.000398327	0.000342466	6.2692e-05	0.000242866	4.0085e-05	0.000270495	0.000459055	0.000609557	0.00128396	0.000235605	0	0	5.67006e-05
Otu0033	Porphyrobacter	0	0	0.000294655	0.000330819	0	0.000331071	0.000718133	0.000958945	0.000521822	0.00169641	0.000834244	0.00108622	0.00075675	0.000731466	0.000659096	0.000788827	0.00081389	0.00316241	0.00475964	0.002664	0.00314046	0.00242509	0.00289552	0.00358138	0.00312135	0.00867903	0.00652481	0.00765632	0.00747748	0.0110214	0.011829	0.0170539	0.00941206	8.65551e-05	0.000402685	0.000711298	0.00890411	0.000250768	0.000242866	0.00184391	0.0018355	0.0033409	0.00681398	0	0.000188484	0.00140682	0.00140134	0.00754118
Otu0034	Sphingopyxis	8.45594e-05	0.00239091	0.00100183	0.00125711	0.000224568	0.00121393	0.0010772	0.00152832	0.00151803	0.000424102	0.00112191	0.000851364	0.00084756	0.000473301	0.000659096	0	0.00011627	0.0110039	0.0113951	0.0154461	0.0139236	0.00349377	0.00237272	0.00198965	0.00163361	0.00209926	0.00135199	0.000453708	0.000424857	0.00141594	0.00231864	0.00171425	0.00142419	0	0.00244966	0.000711298	0	0.000125384	0	0.00236501	0.00090809	0.000102012	0.000304778	0	0.000329846	0.00713959	0.00248153	0
Otu0035	Methylobacterium	0	0	0	0	0	0	8.97666e-05	0	0	0.0037843	0.00451643	0.00402196	0.00329943	0.00684136	0.00613466	0.00617141	0.00709247	0.00661525	0.00579556	0.00430339	0.00580846	0.0090016	0.00856591	0.00970951	0.01021	0.0113423	0.00596638	0.00757125	0.00504164	0.00577858	0.00935314	0.00889638	0.00829747	5.77034e-05	0	0.000113808	6.84932e-05	0	0	0.00032068	0.000347779	0.000459055	0.000391858	0	9.42418e-05	0.000246193	0.00032114	0
Otu0036	Ralstonia	0.000253678	0.000478183	0.000353586	0.0014556	0.000898271	0.00038625	0.000359066	5.99341e-05	0.000664137	0.00110919	0.000632875	0.000968793	0.00015135	0.000860548	0.000405597	0.000510417	0.00058135	0.000968085	0.000223983	0.00112708	0.00102829	0.000616548	0.00036194	0.000795862	0.000204201	0.00122196	0.000999295	0.00107756	0.00127457	0.00275535	0.00125757	0.000502453	0.00402489	0.00141373	0.00436242	0.00165021	0.00308219	0.00294652	0.00194293	0.00236501	0.0018355	0.00224427	0.00283009	0.00419891	0.00197908	0.0034467	0.00338656	0.000198452
Otu0037	Unclassified Rhizobiales	0.00202943	0.00161387	0.00135541	0.00138944	0.00123512	0.000551785	0.000807899	0.000749176	0.00279886	9.78697e-05	0.000258903	0.000176144	6.054e-05	4.30274e-05	0	0	0	9.68085e-05	0	0	0.000194542	0	0.000201078	0.000119379	0	0	0	0.00017014	0.000141619	0.000153075	7.85978e-05	0	0	0.000750144	0.00895973	0.00162176	0.000924658	0.00166134	0.000546448	0.00324688	0.00113994	0.000178521	0.00431044	0.00135337	0.00127226	0.00597897	0.00274429	0
Otu0038	Sediminibacterium	0	0	0	0	0	0	0.000448833	0	0	0.000652465	0.000172602	0.000528433	0	0.00103266	0.000354898	0.000278409	0.000271297	0.00364646	0.0012879	0.00302262	0.00308488	0.000945374	0.000442371	0.00103462	0.000816803	0	0.000793557	0.00133277	0.0010763	0.0012246	0.00196495	0.000325117	0.00303415	0.00017311	0.00895973	0.00654394	0.00438356	0.00222557	0.00346084	0.0175171	0.00998899	0.00981867	0.0124959	0.000520526	0.00193196	0.00970703	0.00367851	0.0155076
Otu0039	Methylobacterium	0.00160663	0	0.000353586	0.000396983	0.00134741	0	8.97666e-05	0.000449506	0.00109108	9.78697e-05	0.000460273	0.000352288	0	0.000516329	0.000202799	0.000464016	0.00034881	0.00548582	0.00475964	0.00479008	0.00478017	0.00912491	0.012507	0.015201	0.00945158	0.00360321	0.0081707	0.00603998	0.00549482	0.00608473	0.00829207	0.0100786	0.014211	0.000115407	0.00255034	0.000910462	0.00246575	0.000532882	0.000303582	0.00128272	0.00104334	0.0025248	0.00272124	3.47017e-05	0.000141363	0.00221574	0.00148892	0.00130411
Otu0040	Unclassified Nitrosomonadaceae	0	0	5.8931e-05	6.61638e-05	0.000112284	0.000165536	0	0.000179802	0	0.000815581	0.000402739	0.000675219	0.0012108	0.000860548	0.000304198	0.00088163	0.00069762	0.000290426	8.39936e-05	5.12308e-05	0.000639208	0.000698755	0.000281509	0.000795862	0.000787631	0.0010653	0.00135199	0.000425351	0.00121792	0.000880181	0.00070738	0.000857126	0.000216725	0.00138488	0.00100671	0.000654394	0.00958904	0.00188076	0.00151791	0.00136289	0.00216396	0.0111703	0.00237292	0.00683624	0.00306286	0.00140682	0.00306542	0.023389
Otu0041	Bdellovibrio	0.000591916	0.000119546	0.000294655	0.000330819	0.000673703	0.00038625	0.000179533	0.000839077	0	0	0.000201369	0.000264216	0.00066594	0.000344219	0.000253498	0.000232008	0.00011627	0.000322695	5.59957e-05	0.000128077	0.000111167	8.22064e-05	0.000201078	0.000238758	0.000145858	0	0.000117564	0.00017014	0	7.65374e-05	0.000196495	0.000236449	0.000123843	0	0	0	0	0	0	0	0	0	2.17699e-05	0	0	0	0	0
Otu0042	Unclassified Betaproteobacteria	0.00439709	0.0019725	0.00206258	0.0014556	0.00235796	0.00137946	0.000807899	0.000779143	0.00583491	0.00169641	0.00163972	0.00270088	0.00217944	0.00240953	0.00141959	0.00194887	0.00166654	0.00322695	0.00487163	0.0041497	0.003335	0.00452135	0.0054291	0.0034222	0.00638856	0.000344655	0.00279215	0.000737275	0.00184105	0.00210478	0.00216144	0.00100491	0.00476795	0.00888632	0.0148322	0.0118076	0.00667808	0.010689	0.00749848	0.00825751	0.00799892	0.00339191	0.00531185	0.0124926	0.00433512	0.0182886	0.00791172	0.000595356
Otu0043	Herminiimonas	0.01632	0.0191273	0.0180918	0.012505	0.0177408	0.014843	0.02693	0.0229847	0.0107685	0.000163116	0.00143835	0.0013798	0.00154377	8.60548e-05	0.000963293	0.00171686	0.00166654	0.00132305	0.000615953	0.00128077	0.00152854	0.00106868	0.00261401	0.00234779	0.000700117	0.00175461	0.000969904	0.000879059	0.00121792	0	0.00172915	0.00289649	0	8.65551e-05	0.00134228	0.00073975	3.42466e-05	9.4038e-05	0.000667881	0.0016034	0.00113994	0.000127515	0.00222053	0	0	0	0	0.000907209
Otu0044	Unclassified Proteobacteria	0.0103163	0.00729229	0.0160882	0.0093291	0.00887042	0.0126911	0.0172352	0.0164819	0.0111006	0.00551333	0.00379725	0.00249538	0.00266376	0.00619595	0.00359968	0.00259849	0.00341059	0.00396915	0.00218383	0.00268962	0.0030015	0.00304164	0.00321724	0.00270593	0.00303384	0.00131595	0.00408535	0.00212675	0.00288903	0.00581685	0.0035762	0.00177336	0.00442738	0	6.71141e-05	0	3.42466e-05	0	0	4.0085e-05	0	2.5503e-05	6.53097e-05	0	0	0	5.8389e-05	5.67006e-05
Otu0045	Aminobacter	0.00397429	0.00280932	0.001709	0.00112478	0.0028071	0.00237268	0.00197487	0.00107881	0	0.00590481	0.00627122	0.00311188	0.00481293	0.00563659	0.00319408	0.00464016	0.00430199	0.00196844	0.00601954	0.00358616	0.00211217	0.00213737	0.00277487	0.00218862	0.00332555	0.0038852	0.00346814	0.00450872	0.00388036	0.00141594	0.00192565	0.0024236	0.000588254	0.00326024	0.00302013	0.00318662	0.00400685	0.00617516	0.00613236	0.00573215	0.00349711	0.00647777	0.00330902	0.00170039	0.0031571	0.00372806	0.00347415	0.000538656
Otu0046	Unclassified Bacteria	0.00194487	0.00687388	0.00724851	0.00516078	0.0102178	0.0130773	0.00915619	0.00659275	0.0114326	3.26232e-05	0.000258903	0.000352288	0	0.000473301	0.000304198	0.000278409	0.00046508	0.000258156	0.00288378	0.000512308	0.000277917	0.000411032	0.000281509	0.000397931	0	6.26645e-05	0.000470256	0.000340281	0.00121792	0.000497493	0.00035369	0	0.000928821	0.00219273	0.00197987	0.00130879	0.00239726	0.00062692	0.00106254	0.00200425	0.00285952	0.00181072	0.00285186	0.000520526	9.42418e-05	0.00298948	0.00116778	0
Otu0047	Caulobacter	0	0	0	0	0.00179654	0	8.97666e-05	0	0.00028463	0.00300134	0.00325068	0.00322931	0.00348105	0.0026677	0.00218009	0.00241288	0.00228664	0.00848688	0.00643951	0.00676247	0.0076705	0.00554893	0.0054291	0.00596896	0.00735123	0.00134729	0.00531977	0.00615341	0.00634453	0.00531935	0.00495166	0.00431519	0.00978358	0.000259665	0.000872483	0.00105272	0.00205479	0.000846342	0.000971463	0.00128272	0.00144908	0.00127515	0.00324371	0	0.000141363	0.000457215	0.00178087	0.00104896
Otu0048	Unclassified Bacteria	0.00439709	0.00119546	0.00524486	0.00264655	0.00572648	0.000882856	0.00421903	0.00167815	0.00256167	0.00117444	0.00138082	0.00102751	0.0012108	0.000387247	0.00121679	0.000974433	0.00093016	0.000419504	0.00145589	0.000179308	0.000361292	0.000328826	0.000563018	0.000437724	0.000233372	0.00178594	0.00102869	0.000510421	0.000311562	0.00110979	0.000550185	0	0	0	0	0	0	0	0	0	0	0	0	0	0	0	0	0
Otu0049	Unclassified Bacteria	0.00803315	0.0063957	0.0101361	0.00430065	0.0104424	0.00562821	0.00861759	0.00815103	0.00996205	0.00208789	0.00348081	0.00328803	0.00496428	0.00382944	0.00415737	0.00394413	0.00325556	0.00287199	0.00139989	0.00148569	0.00141738	0.00172633	0.0025738	0.00194986	0.00212952	0.0020366	0.00176346	0.00155962	0.00152949	0.00241093	0.00255443	0.00103446	0.000495371	0	0	2.84519e-05	0	0	0	0	0	0	4.35398e-05	0	0	0	0	0
Otu0050	Sphingomonas	0	0	5.8931e-05	0	0	0.000165536	0.000359066	5.99341e-05	0	0.00270773	0.00460273	0.00440361	0.00587238	0.00524934	0.00491787	0.00371212	0.00414697	0.0064539	0.00755943	0.00709547	0.00636429	0.00443915	0.00349875	0.00433745	0.00490082	0.00350921	0.00343875	0.00493407	0.00413527	0.00558723	0.00455867	0.00360584	0.00371529	0.000663589	0.00228188	0.00258913	0.00195205	0.000376152	0.00121433	0.0008017	0.00090809	0.000510061	0.00134973	0	0.000706814	0.000351704	0.00154731	2.83503e-05
Otu0051	Unclassified Betaproteobacteria	0.00481989	0.00328751	0.00471448	0.00284504	0.00258253	0.00402803	0.00278276	0.00332634	0.00422201	0.00101132	0.000402739	0.000499075	0.00108972	0.00103266	0.00111539	0.000510417	0.000736377	0.000742199	0.00053196	0.000973386	0.000611417	0.000616548	0.00072388	0.000358138	0.000525088	3.13322e-05	0.00126381	0.000396994	0.000169943	0.000574031	0.000471587	0	0.000185764	8.65551e-05	0	8.53558e-05	6.84932e-05	3.1346e-05	6.07165e-05	8.017e-05	0.000115926	0.000102012	0.000174159	0	0	0	8.75836e-05	0
Otu0052	Unclassified Microbacteriaceae	0.00287502	0.000119546	0.000883965	0.000926294	0.00157197	0.00115875	0.000448833	0.000928978	0.00170778	0.000293609	0.000316437	0.000381646	0.00039351	0.000387247	0.000304198	0.000417614	0.00034881	0.000193617	0.00039197	0.000973386	0.0003335	0.000657651	0.000924958	0.000437724	0.000204201	0.0009713	0.000529038	0.000964129	0.000651447	0.000841912	0.000117897	0.000798014	0.000340568	8.65551e-05	6.71141e-05	2.84519e-05	3.42466e-05	0	0	0.000200425	1.93211e-05	5.10061e-05	8.70796e-05	0	0	0	0	0
Otu0053	Pseudomonas	0.00143751	0.000537956	0.00100183	0.0038375	0.00516506	0.00038625	0.00368043	0.000239736	0.00275142	0.000391479	0.000258903	0.000117429	0.00033297	8.60548e-05	0.000202799	9.28031e-05	0.000310053	0.000258156	0.000839936	0.000486693	8.3375e-05	0.000328826	0.000321724	0.00051731	0.000670945	0.00162928	0.000440865	0.000510421	0.000623124	7.65374e-05	0.000314391	0	0.000309607	2.88517e-05	6.71141e-05	0.000256067	6.84932e-05	6.2692e-05	0.000121433	0.000120255	0.000328458	0	0.000174159	0.000104105	0	0.000386874	8.75836e-05	0.00192782
Otu0054	Desulfovibrio	0.0027059	0.00185296	0.000766103	0.00125711	0	0.00115875	0.000897666	0.000869044	0.00118596	0.000913451	0.000373972	0.000440361	0.00018162	0.000344219	0.000354898	0.000185606	0.00023254	0.000193617	0	0.000230539	0.000111167	4.11032e-05	0.000522802	7.95862e-05	0.000145858	0	0	0	8.49714e-05	0.000420956	0.000157196	8.86682e-05	0	8.65551e-05	0.000100671	0.000256067	0.000239726	6.2692e-05	0.000182149	0.000200425	0.000193211	0.000204024	0.000217699	0	0.000141363	0.000175852	0	5.67006e-05
Otu0055	Unclassified Bacteria	0.00245222	0.001315	0.00335907	0.000727802	0.00190883	0.000551785	0.00125673	0.00107881	0.00270398	0.000260986	0.000345205	0.00129172	0.00184647	0.000559356	0.00141959	0.00060322	0.00093016	0.000258156	2.79979e-05	0	0.000722584	0.000287722	0.000402156	0.000437724	0.000116686	0.000156661	0.00223372	0.000340281	0.00101966	0.0006123	0.000510886	0.000266005	0.000216725	5.77034e-05	0.000134228	2.84519e-05	0	0	0	0	1.93211e-05	2.5503e-05	0	0	0	0	0	2.83503e-05
Otu0056	Unclassified Deltaproteobacteria	8.45594e-05	0	0.000235724	0.000330819	0	0.00038625	0.000628366	0.000389571	0.000142315	0	5.75341e-05	2.93574e-05	3.027e-05	0.00017211	5.06997e-05	0.000139205	0	6.4539e-05	8.39936e-05	5.12308e-05	5.55833e-05	8.22064e-05	4.02156e-05	0	5.83431e-05	0.000532648	2.9391e-05	0.000141784	0.000113295	3.82687e-05	0.000157196	0	0	0	0	0	0	0	0	0	0	0	0	0	0	0	0	0
Otu0057	Phenylobacterium	0.000930154	5.97729e-05	0.000117862	6.61638e-05	0	5.51785e-05	0.000448833	0.00203776	0.0012334	0.000326232	0.000661642	0.000352288	9.081e-05	0.000258164	0.000456297	0.000278409	0.00023254	0.00448546	0.00624353	0.00545608	0.00419654	0.00324715	0.00277487	0.00183048	0.00367561	0.000438651	0.000793557	0.000113427	0.000736419	3.82687e-05	0.000314391	0.000118224	0	0.00230814	0.00100671	0.000512135	0	0.000376152	0.000273224	0.00116246	0.000753521	0.000102012	0.000108849	0.000485824	0.000659693	0.000246193	0.000788252	0
Otu0058	Unclassified Comamonadaceae	0	5.97729e-05	5.8931e-05	0.000595474	0	0.000110357	0	0.000239736	0.000142315	6.52465e-05	0	0	0	0	0	0	0	0	0	5.12308e-05	2.77917e-05	0.00012331	8.04311e-05	0	8.75146e-05	9.39967e-05	5.8782e-05	0	5.66476e-05	7.65374e-05	0	0	0	0.000317369	0.00033557	0.00125188	0.000205479	0.00332268	0.000273224	0.000200425	0.000598953	2.5503e-05	0.000217699	0.00565638	0.00051833	0	0.000846641	0.000113401
Otu0059	Unclassified Chitinophagaceae	0.00135295	0.00179319	0.00153221	0.000926294	0.000785987	0.00148982	0.00197487	0.00152832	0.00199241	0.000228363	0.00230136	0.00146787	0.00118053	0.00103266	0.00187589	0.00204167	0.00127897	0.00122624	0.000503962	0.00146008	0.000778167	0.000904271	0.00116625	0.00111421	0.000350058	0.00109663	0.00138138	0.000879059	0.00175608	0.00133941	0.000314391	0.00106402	0.00272454	5.77034e-05	0	0.000170712	3.42466e-05	3.1346e-05	0	4.0085e-05	0.000115926	5.10061e-05	0.000130619	0	0	0	0	0
Otu0060	Novosphingobium	0.000761035	0	0.000176793	0	0.000224568	0	0.000718133	0.000719209	0	0.00590481	0.0075082	0.00786777	0.00820317	0.00641108	0.00654026	0.00570739	0.00623983	0.00567943	0.00487163	0.00799201	0.006003	0.00665872	0.00727902	0.00851572	0.00673862	0	0	5.67135e-05	0.000396533	0	0	0	0	0	0	0.000512135	0	0	3.03582e-05	0.000601275	0.00170025	0	0	0	0.000235605	0.00457215	0.000291945	0
Otu0061	Unclassified Proteobacteria	0.000507357	0.000119546	0.00141434	0.000264655	0.000561419	0.000606964	0.000359066	0.000239736	0.00113852	0.00212051	0.00149589	0.00111558	0.00148323	0.00292586	0.00147029	0.00204167	0.00166654	0.00245248	0.000811938	0.00238223	0.002001	0.00365819	0.00253358	0.00302427	0.00411319	0.000845971	0.00146955	0.00121934	0.00155781	0.00164556	0.00153266	0.000354673	0.000650175	0.000201962	0.000234899	5.69039e-05	0.000410959	0.00015673	0.000576806	0.000681445	0.000714879	0.000612073	0.000370088	0.000832842	0.000801056	0	0.000875836	0.000283503
Otu0062	Bdellovibrio	0.01632	0.00980275	0.0218045	0.0104539	0.0215585	0.0200298	0.0267504	0.0268205	0.0154649	0.00482824	0.00491916	0.00484397	0.00584211	0.00520632	0.00790915	0.00459375	0.00573599	0.00332376	0.00288378	0.00571224	0.00447446	0.00468577	0.00410199	0.0045762	0.00729288	0.00589046	0.00737715	0.00416844	0.00657112	0.0056255	0.00589484	0.00469941	0.00349856	0	6.71141e-05	0.00014226	6.84932e-05	0	6.07165e-05	0	5.79632e-05	0	0.000217699	0	0	0	0	8.50509e-05
Otu0063	Bdellovibrio	0.00794859	0.00830843	0.0107844	0.00893212	0.00864586	0.01236	0.0100539	0.0119269	0.00811195	0.00450201	0.00267534	0.00319995	0.00348105	0.00744374	0.00370107	0.00329451	0.00310053	0.00271064	0.000615953	0.00184431	0.00177867	0.00201406	0.00201078	0.00326303	0.00192532	0.00244392	0.00529038	0.00204168	0.00158613	0.00348245	0.00514816	0.00478808	0.00222917	0	0	2.84519e-05	3.42466e-05	0	0	0	0	7.65091e-05	0.000174159	0	0	0	0	0
Otu0064	Hyphomicrobium	0.00287502	0.0022116	0.00571631	0.00357285	0.00325623	0.00297964	0.00287253	0.00326641	0.00436433	0.00199002	0.000834244	0.000528433	0.00078702	0.00017211	0.000354898	0.000371212	0.000426324	0.000580851	0.000251981	0.000922155	0.000528042	0.000575445	0.00036194	0.000716275	0.00075846	0	0.000117564	0.000765632	0.0005948	0.000535762	0.00070738	0.000591121	0.000309607	0.000980958	0.00090604	0.00122343	0.00119863	0.000282114	0.000212508	0.00112238	0.000850127	0.000433552	0.00102318	0.000416421	9.42418e-05	0	0.00116778	0.000538656
Otu0065	Bdellovibrio	0.00414341	0.00083682	0.00276976	0.00119095	0.000336852	0.00171053	0.00278276	0.00239736	0.0012334	0.000163116	0.000402739	0.000411003	0.00045405	0.00017211	0.000304198	0.000278409	0.00023254	0.000354965	0.00190386	0.000589154	0.000667	0.000205516	0.000482587	0.000278552	0.000145858	0	0.000323301	0.000623848	0.000113295	7.65374e-05	0.000628783	0	0.000154804	0	0	0	0	0	0	0	0	0	0	0	0	0	0	0
Otu0066	Unclassified Rhizobiales	0.0136141	0.0041841	0.00436089	0.0047638	0.00842129	0.00441428	0.0035009	0.0029967	0.00920304	0.000391479	0.000172602	0.000733934	0.00054486	0.000516329	0.000152099	0.000278409	0.00108519	0.000258156	0.000279979	0.000128077	0.00016675	0.000534342	0.000321724	0.000795862	0.00131272	0	0.000793557	0.00017014	0.00101966	0.000459225	0.000746679	0.00245315	0.000154804	0.00300058	0.00211409	0.0021908	0.0015411	0.000532882	0.000637523	0.00096204	0.000579632	0.000943613	0.00235115	0.0019086	0.000942418	0.000808919	0.000437918	0.000141751
Otu0067	Unclassified Betaproteobacteria	0	0.000537956	0.00129648	0.000396983	0.000224568	0.000331071	0.000897666	0.00143842	0.000996205	0.000685088	0.000143835	5.87147e-05	9.081e-05	0.000215137	0	0	7.75134e-05	0.000258156	0	0	5.55833e-05	4.11032e-05	8.04311e-05	3.97931e-05	0.000233372	0	0.000176346	0	8.49714e-05	0.000153075	7.85978e-05	0	0	0.00268321	0.000402685	0.00165021	0.00174658	0.00278979	0.00139648	0.00216459	0.00177754	0.00183622	0.000653097	0.00385189	0.00136651	0.00390391	0.00140134	0.00215462
Otu0068	Acinetobacter	0	0	0.000117862	0.000198491	0.00134741	0.000220714	0	0	0.000711575	0	0	0.000352288	0	0.000473301	0	0.000139205	7.75134e-05	0.000193617	0.00109192	5.12308e-05	0.000194542	0.000164413	0.000442371	0.000358138	0	9.39967e-05	0.000911122	8.50702e-05	8.49714e-05	0.000229612	3.92989e-05	0.000709346	3.09607e-05	0	0	5.69039e-05	0	0	0	0	0	0	0	0.000728737	0	0	8.75836e-05	0
Otu0069	Planctomyces	0.0115846	0.00962343	0.0103129	0.00827048	0.00505277	0.00711803	0.0059246	0.00677255	0.00450664	0.00606792	0.0053219	0.00569533	0.00508536	0.00425971	0.00628676	0.00380493	0.00600729	0.00425958	5.59957e-05	0.00240785	0.00464121	0.00369929	0.00341832	0.00421807	0.00233372	0.00830305	0.00526099	0.0039983	0.00385204	0.00455398	0.00294742	0.0102855	0.00294127	0	0.000134228	5.69039e-05	0.000513699	0	0	4.0085e-05	1.93211e-05	7.65091e-05	0.000457168	0	9.42418e-05	0	0	0
Otu0070	Unclassified Comamonadaceae	0	0	0	0	0	0	0	0	0	6.52465e-05	5.75341e-05	0	6.054e-05	0	0.000101399	4.64016e-05	0	6.4539e-05	0.000111991	0	2.77917e-05	0	0.000120647	0.000119379	0.000175029	3.13322e-05	0.000235128	0	0	0.00030615	0.000117897	0	3.09607e-05	0	0	0	3.42466e-05	0	0	0	3.86421e-05	7.65091e-05	2.17699e-05	3.47017e-05	0	3.51704e-05	2.91945e-05	0
Otu0071	Unclassified Alphaproteobacteria	0.00490445	0.00328751	0.00636455	0.00297737	0.00145969	0.00474535	0.00475763	0.00269703	0.0050759	0.000848204	0.00192739	0.00140915	0.00039351	0.000860548	0.00131819	0.000696023	0.000736377	0.000774468	0.000223983	0.000486693	0.000305708	0.000452135	0.000402156	0.000397931	0.00075846	0.000156661	0.000382083	0.000567135	0.000736419	0.000727106	0.000668081	0.00109357	0.00130035	0.000259665	0.000536913	0.000227615	0.000171233	3.1346e-05	3.03582e-05	8.017e-05	0.000135247	0.000382546	0.000435398	0	0	0	0.000204362	5.67006e-05
Otu0072	Gemmatimonas	0.00126839	5.97729e-05	0.000648241	0.000529311	0.000673703	0.000331071	0	0.000359604	0.000664137	0.000195739	2.8767e-05	0.000146787	0.0003027	0	0.000152099	0.000324811	7.75134e-05	0.000161348	0	0	8.3375e-05	4.11032e-05	4.02156e-05	3.97931e-05	0.000116686	0	2.9391e-05	8.50702e-05	0.000566476	0.000191344	0.000157196	0	0	5.77034e-05	6.71141e-05	2.84519e-05	0	0	0	4.0085e-05	0	0	0	0	0	0	0	0
Otu0073	Methylophilus	0.00143751	0.00155409	0.00436089	0.00198491	0.00213339	0.00838713	0.00691203	0.00605334	0.00313093	0	0.000373972	5.87147e-05	0.00021189	4.30274e-05	0.000557696	0.000278409	0.00034881	0.00103262	0.00106392	0.000333	0.000305708	0.000657651	0.000924958	0.000915241	0.00113769	0.0028199	0.000999295	0.000538778	0.000424857	0.000727106	3.92989e-05	0.000413785	0.000774018	0.000144259	0.000302013	0.000256067	0.000308219	0	0	0	3.86421e-05	0.000178521	0.000413628	3.47017e-05	0.000235605	0	0	0
Otu0074	Bacteriovorax	0.000422797	0.00179319	0.00159114	0.00317586	0.000336852	0.0262098	0.0160682	0.0129757	0	0.000587218	0.000661642	0.000733934	0.00045405	0.00017211	0.000912594	0.000556819	0.000968917	0.00151667	0.00319176	0.00184431	0.00136179	0.00106868	0.00201078	0.00167131	0.00116686	0.000313322	0.00152833	0.000680561	0.00141619	0.000994987	0.00137546	0	0.00123843	0	0	0	0	0	0	0	0	0	0	0	0	0	0	5.67006e-05
Otu0075	Unclassified Proteobacteria	0.00524269	0.00227137	0.00135541	0.00377134	0.00449135	0.00320035	0.002693	0.0025472	0.00944023	0.000293609	0.000316437	0.000675219	0.00051459	0.00017211	0.000304198	0.000139205	0.000426324	0.000161348	0	0.000435462	0.000416875	0.000411032	0.000281509	0.000358138	0.000320887	0	0.000352692	0.000141784	5.66476e-05	0.000191344	0.00070738	0.000354673	0	0.00118292	0.000671141	0.00182092	0.00130137	0.000188076	0.00033394	0.00048102	0.0003671	0.000535564	0.000957875	0	4.71209e-05	0.000457215	5.8389e-05	0
Otu0076	Unclassified Alphaproteobacteria	0	0	0	0	0	0	0	0	0	0.000163116	8.63011e-05	0.000411003	3.027e-05	8.60548e-05	0	0	0.000193783	0.00119397	0.00207184	0.001998	0.00113946	0.00110979	0.0010456	0.000875448	0.00221704	0.00131595	0.00605455	0.00348788	0.00379539	0.00528108	0.00318321	0.00224626	0.00396297	0	0	0	6.84932e-05	9.4038e-05	0	0	1.93211e-05	0.000127515	4.35398e-05	0	0	0	0	0
Otu0077	Limnobacter	0.0197024	0.00866707	0.00718958	0.00661638	0.0097687	0.00739392	0.00861759	0.00776146	0.0203036	0.00336019	0.0025315	0.00193759	0.00269403	0.00206532	0.00248428	0.00167046	0.00248043	0.000968085	0.000699947	0.00143446	0.00116725	0.00115089	0.00108582	0.00107441	0.00230455	0.00169194	0.00126381	0.00130441	0.00127457	0.000841912	0.00176845	0.000472897	0.00216725	0.000548182	0.000872483	0.00088201	0.000616438	0.00015673	0.000121433	0.00032068	0.000115926	0.000382546	0.000478938	0	0	0	0	0.000226802
Otu0078	Unclassified Alphaproteobacteria	0.0054118	0.00113568	0.00165007	0.00105862	0.000785987	0.00126911	0.00197487	0.00134852	0.00308349	0.000260986	0.000316437	0.000528433	0.00087783	0.000731466	0.000659096	0.00088163	0.00108519	0.000548582	0.000251981	0.000409847	0.000583625	0.000534342	0.000321724	0.00051731	0.00160443	0.000219326	0.000117564	0.000822345	0.000424857	0.0006123	0.00106107	0.00295561	0	0.00017311	0.000167785	0.000113808	6.84932e-05	0	0	4.0085e-05	3.86421e-05	7.65091e-05	8.70796e-05	0	0	0	0	0
Otu0079	Unclassified Bacteria	0	0.000298864	0.000412517	0.000198491	0	0.000275893	0	0.000119868	0.000142315	0.000130493	0	2.93574e-05	9.081e-05	0.000645411	0.000101399	0	0	9.68085e-05	0.000251981	0.000307385	0.00016675	0.000164413	8.04311e-05	0.000119379	0.00075846	0	0.000146955	0.00017014	0.000849714	0	7.85978e-05	0	0	0	3.3557e-05	0.00014226	0	6.2692e-05	0	0	5.79632e-05	0.000153018	0.000326548	0	0	0	0	0
Otu0080	Unclassified Sphingomonadaceae	0	0	0	0.0016541	0	0	0.00116697	0	0	0.000228363	8.63011e-05	0	0	0	0	0	7.75134e-05	3.22695e-05	2.79979e-05	5.12308e-05	0	0.000205516	0.000120647	3.97931e-05	2.91715e-05	0.00125329	0.00170468	0.00289239	0.00266244	0.00237266	0.00165055	0.00266005	0.00136227	0	3.3557e-05	0.000569039	0.0014726	0	0	0	0.00102402	0.000459055	0.00154566	0	0	0.00263778	0.00186845	8.50509e-05
Otu0081	Unclassified Bacteria	0.00744123	0.00478183	0.00106076	0.00674871	0.00370537	0.00469017	0.0105925	0.00758166	0.00232448	0.000195739	0	0	3.027e-05	0.000258164	5.06997e-05	0.000232008	0	0.000290426	0	0.000307385	0	0	8.04311e-05	0.000238758	2.91715e-05	0	0.000617211	0.000652205	0.000453181	0.000229612	0.000314391	0	0.000557293	0	0	0	0	0	0	0	0	0	0	0	0	0	0	0
Otu0082	Unclassified Bacteria	0.00135295	0.000537956	0.00165007	0.00158793	0.00134741	0.000165536	8.97666e-05	0.000389571	0.00028463	0	0.000575341	0.000234859	0.00039351	0.000129082	0.000506997	0.000371212	0.000387567	0	0	0.000358616	0.000194542	0.000164413	0.000201078	3.97931e-05	0.000495916	0.000313322	0	8.50702e-05	0.000283238	0.000267881	3.92989e-05	0	0.00123843	0	0	0	0	0	0	0	5.79632e-05	0	0	0	0	0	0	0
Otu0083	Peredibacter	0.00600372	0.00155409	0.00212152	0.00112478	0.000449135	0.00397285	0.0024237	0.00320647	0.00199241	0.000130493	0.000143835	0.000528433	0.00111999	0.000774493	0.000709795	0.000974433	0.000310053	0.000516312	5.59957e-05	0.00115269	0.000416875	0.000452135	0.000924958	0.000159172	5.83431e-05	3.13322e-05	0.00158711	0.000964129	0.000793066	0.000267881	0.000746679	0	3.09607e-05	0	0	0	0	0	0	0	0	0	0	0	0	0	0	8.50509e-05
Otu0084	Bdellovibrio	0.00118383	0.00155409	0.000825034	0.000529311	0.00269481	0.00160018	0.0021544	0.00278693	0.00118596	0.00130493	0.000201369	0.000117429	6.054e-05	0.00017211	0.000152099	0.000278409	3.87567e-05	0.000354965	0	2.56154e-05	0.000305708	0.000452135	0.000321724	0.000557103	0.000145858	0.000125329	0.000440865	2.83567e-05	0	0.000344419	0.00035369	0	0.000123843	0	0	0	0	0	0	0	0	5.10061e-05	0	0	0	0	0.000525501	0
Otu0085	Unclassified Rhizobiales	0.000338238	0.00101614	0.000471448	6.61638e-05	0.00168426	0.000772499	0.000448833	0.000329637	0.000474383	3.26232e-05	0.000402739	8.80721e-05	0	8.60548e-05	0.000101399	0.000185606	0.000193783	0.000225887	0	0.000256154	2.77917e-05	0	0.000281509	0.000159172	0.000116686	0.00115929	0.000411474	0.00017014	2.83238e-05	3.82687e-05	7.85978e-05	0	0	8.65551e-05	6.71141e-05	2.84519e-05	3.42466e-05	0	3.03582e-05	0	1.93211e-05	0	0.000130619	0	0	0	0	0
Otu0086	Unclassified Actinomycetales	0.000507357	0.000657501	0.000825034	0.00105862	0	0.000275893	0.000628366	0.000779143	0.00113852	6.52465e-05	0	0.000176144	0	0	0	0	0	3.22695e-05	0.000139989	0.000358616	0.000138958	8.22064e-05	0.000442371	0.000278552	0.000175029	0	0	0.000283567	5.66476e-05	0.000344419	0.00035369	0.00112313	3.09607e-05	0.000259665	0.000201342	8.53558e-05	0.000136986	0.00015673	3.03582e-05	0.000360765	0.000212532	7.65091e-05	0.000217699	0	0	0	0	0
Otu0087	Phenylobacterium	0.000845594	0.000239091	0.000353586	0	0.000224568	0.000220714	0	0.00029967	0.000379507	0.000260986	0.000115068	0.000352288	0.00024216	0.000215137	0.000152099	9.28031e-05	0.00011627	6.4539e-05	0	0.000204923	8.3375e-05	4.11032e-05	0.000120647	0.000198965	5.83431e-05	0	0.000117564	0.000198497	2.83238e-05	0.00030615	3.92989e-05	0	3.09607e-05	0.000836699	0.000302013	0.000597491	0.000136986	0.000282114	0.000819672	0.00032068	0.000483026	2.5503e-05	0.000108849	0	0.000329846	0	2.91945e-05	0
Otu0088	Hyphomicrobium	0.00837139	0.0022116	0.00477341	0.00172026	0.00965641	0.00342107	0.00206463	0.00179802	0.00564516	0.00127231	0.000690409	0.000499075	0.00048432	0.000946603	0.00101399	0.00060322	0.000620107	0.000290426	0.000587955	0.00102462	0.000639208	0.000822064	0.000683664	0.000397931	0.00105018	9.39967e-05	0.00058782	0.000822345	0.00130289	0.000765374	0.000825277	0.000325117	0.0026007	0.000288517	0.000167785	0.000256067	0.000513699	0	3.03582e-05	4.0085e-05	0.000135247	0.000280534	0.000435398	0	9.42418e-05	0	0.000116778	0
Otu0089	Roseomonas	0.0112464	0.00567842	0.00878072	0.00555776	0.0107792	0.00733874	0.00915619	0.00584357	0.00683112	0.000358856	0.000805477	0.000792649	0.00063567	0.000688439	0.00101399	0.000278409	0.000542594	0.000516312	0.00162388	0.000128077	0.000389083	0.000863167	0.000844527	0.00127338	0.000787631	0.00166061	0.000323301	0.000765632	0.000679771	0.00172209	0.000825277	0	0.000371529	0.000952106	0.00134228	0.00088201	0.000547945	0.000376152	0.000667881	0.00100212	0.000676237	0.000892607	0.00148035	6.94035e-05	0.000706814	0.000105511	0.000145973	0.00192782
Otu0090	Unclassified Proteobacteria	0.000591916	0.00155409	0.0066592	0.00185259	0.0034808	0.00126911	0.0029623	0.00134852	0.000332068	0.000489349	0.000604108	0.00102751	0.00054486	0.00017211	0.000608396	0.000835228	0.00104643	0.00064539	0.000167987	0.000589154	0.000416875	0.000164413	0.000522802	0.000955034	0.000612602	0.00244392	0.000382083	0.000113427	0.00082139	0.00225785	0.000157196	0.00274871	0.000309607	0	3.3557e-05	0	0.00010274	0	0	0	0	0	2.17699e-05	0	0	0	0	0
Otu0091	Bacteroides	0	5.97729e-05	0	6.61638e-05	0.000112284	0	0.0045781	0.000149835	4.74383e-05	6.52465e-05	0	0	0	0	0	0	0	3.22695e-05	2.79979e-05	0	0	0	0	0	0	0	5.8782e-05	0	0	0	0	0	0	0	0	5.69039e-05	0.000171233	0	0	4.0085e-05	0.000115926	2.5503e-05	2.17699e-05	0	0	0	0	0
Otu0092	Unclassified Gammaproteobacteria	0.00152207	0.00149432	0.00153221	0.00185259	0.00202111	0.000938035	0.00116697	0.00122865	0.00232448	0.000130493	2.8767e-05	2.93574e-05	0.00018162	0	0	9.28031e-05	0.000155027	3.22695e-05	0	7.68462e-05	0.000111167	4.11032e-05	0.000120647	7.95862e-05	0.000233372	0	0	0	8.49714e-05	0.000191344	7.85978e-05	0	0	0.000375072	6.71141e-05	0.000398327	0.000616438	0.00015673	0.000242866	0.00040085	0.000483026	0.000178521	0.000478938	0.000347017	4.71209e-05	3.51704e-05	0	2.83503e-05
Otu0093	Pasteuria	0.00794859	0.00322773	0.001709	0.00284504	0.0041545	0.0038625	0.0032316	0.0025472	0.00474383	0.0014028	0.00204246	0.00252473	0.00208863	0.00249559	0.00299128	0.00227368	0.00279048	0.00235567	0.00109192	0.00430339	0.00191763	0.00263061	0.00402156	0.00274572	0.00096266	0.000877303	0.00161651	0.00246704	0.00220926	0.00355899	0.00192565	0.000502453	0.000835939	0.0017311	0.00379195	0.00190628	0.00208904	0.000376152	0.000485732	0.000681445	0.000560311	0.000739588	0.0011538	0	0.000235605	0	0.000817447	2.83503e-05
Otu0094	Unclassified Sphingomonadales	0.000169119	0.00083682	0.000294655	0	0.000673703	0.00038625	0.000359066	0.00539407	0.000806452	0.000456725	0	0	0	0	5.06997e-05	4.64016e-05	0	0	0	0	5.55833e-05	0.000205516	4.02156e-05	0.000198965	0	0	0	0.000141784	2.83238e-05	3.82687e-05	7.85978e-05	0	0	8.65551e-05	0.000234899	2.84519e-05	0.000273973	0	0.000121433	0.000120255	1.93211e-05	0.000127515	0.000217699	0	0	0.00158267	0.00058389	0.000255153
Otu0095	Unclassified Xanthomonadaceae	0.000253678	0.000896593	0.00129648	0.000396983	0.000898271	0.000331071	0.000448833	0.000839077	0.000474383	0.000685088	0	0.000117429	0.00018162	0	5.06997e-05	0.000185606	0.00011627	0.000129078	0.000251981	0	8.3375e-05	8.22064e-05	8.04311e-05	0.000318345	0	0	2.9391e-05	5.67135e-05	0.000283238	3.82687e-05	0.000117897	0	0	0	0	0	0	0	0	0	3.86421e-05	0	0	0	0	0	0	0
Otu0096	Unclassified Rhizobiales	0.000676476	0.000478183	0.000766103	0.000132328	0.00202111	0.000551785	0.00116697	0.000419539	0.000948767	0	0	5.87147e-05	0.00054486	4.30274e-05	5.06997e-05	9.28031e-05	0	0	0	0	5.55833e-05	0	8.04311e-05	0.000119379	5.83431e-05	0	0	5.67135e-05	0	3.82687e-05	0	0	0	0.000403924	0.000134228	0.000113808	0.000136986	0	0	0.00016034	9.66053e-05	7.65091e-05	2.17699e-05	0	0.000188484	0	0	0
Otu0097	Unclassified Bacteroidetes	0.00380518	0.00107591	0.00176793	0.000661638	0.000561419	0.000496607	0.0010772	0.000839077	0.00275142	0.000815581	0.000460273	0.000381646	6.054e-05	0.000731466	0.000659096	0.000417614	0.00046508	0.000290426	0.000895932	0.000204923	0.000277917	0.000822064	8.04311e-05	0.00051731	0.000116686	0.0010653	0.000176346	0.000425351	0.000311562	0.000229612	0.000157196	0	0	0	0	0	0	0	0	0	0	0	0	0	0	0	0	0
Otu0098	Flavobacterium	0.00152207	0.00167364	0.000648241	0.000926294	0.00123512	0.000938035	0.000718133	0.00125862	0.00085389	0.000130493	5.75341e-05	0.000293574	0.0006054	0.000215137	0.000253498	0.000417614	0.000271297	0.000129078	0.00218383	5.12308e-05	0.000389083	0.000328826	0.000201078	0.00051731	0	0	0.000323301	0.000453708	0.00164278	0.000688837	0.000196495	0	3.09607e-05	0	3.3557e-05	0	3.42466e-05	0	0	0	0	7.65091e-05	8.70796e-05	0	0	0	0	0
Otu0099	Sphingomonas	0	5.97729e-05	0.000117862	0	0.000336852	0.000165536	0	0.000239736	0.00028463	0	0.000230136	5.87147e-05	0	0	0	0	0	0.000161348	0.000111991	0.000230539	0.000194542	0.000205516	4.02156e-05	0.000318345	0	0.000438651	0.000176346	0.000879059	0.00110463	0.00153075	0.00157196	0.000916238	0.00198149	0	0	5.69039e-05	0.00010274	0	3.03582e-05	0.000120255	1.93211e-05	0.00033154	0.00124088	0	4.71209e-05	0	0	0
Otu0100	Unclassified Bacteria	0	0.000179319	0.000530379	0.000264655	0.000112284	0.000441428	0.0002693	0.000719209	0.000806452	0.000130493	5.75341e-05	0.000322931	6.054e-05	8.60548e-05	5.06997e-05	9.28031e-05	0.000155027	0.000129078	2.79979e-05	0.000384231	0.000194542	0.000287722	0.000160862	0.000119379	0.000116686	0	2.9391e-05	0.000482064	0.000339886	0.000191344	0	0.00564521	0	8.65551e-05	3.3557e-05	0.000227615	0	0	0	0	0	0	2.17699e-05	0	0	0	0	0
Otu0101	Unclassified Rhizobiales	0.00160663	0.000896593	0.00218045	0.00172026	0.00314395	0.00148982	0.000718133	0.00146838	0.00298861	6.52465e-05	0.000920545	0.00055779	0.00054486	0.00017211	0.000659096	0.000278409	0.00081389	0.000258156	0.000167987	0.000384231	0.00050025	0.000452135	0.000924958	0.000278552	0.000583431	0	0.000470256	0.000765632	0.000283238	0.00164556	0.000825277	0.00274871	0.000743057	0.000634737	0.000436242	0.000625942	0.000582192	6.2692e-05	0.000182149	0.00056119	0.000154568	0.000178521	0.000674867	0	0.000235605	0	0	0
Otu0102	Unclassified Bacteria	0.000845594	0.000179319	0.000117862	0.000595474	0.000112284	0.000220714	0	0.000779143	0.000332068	0	0.000172602	0.000176144	9.081e-05	8.60548e-05	0	0.000139205	7.75134e-05	6.4539e-05	0	0	0.000194542	8.22064e-05	0	0	0	0	5.8782e-05	0	0	0.000191344	0.000196495	0.00549743	0	5.77034e-05	0	2.84519e-05	0	0	0	0	0	0	2.17699e-05	0	0	0	0	0
Otu0103	Unclassified Acidimicrobiales	0	0	0.000235724	0.000264655	0.000673703	0.000165536	0	0.000329637	0.000332068	0	0.000402739	0.000293574	9.081e-05	0	0	9.28031e-05	7.75134e-05	0	0	0	5.55833e-05	4.11032e-05	0.000201078	0.000159172	0	0	8.81731e-05	0	0.00022659	0	0	0	0	8.65551e-05	0.000234899	5.69039e-05	0.000136986	3.1346e-05	0	4.0085e-05	3.86421e-05	0.000102012	2.17699e-05	0	0	0	0	0
Otu0104	Devosia	0	0.000478183	0.00111969	0.000992457	0.00258253	0.000496607	0.0002693	0.000839077	0	0	0.000115068	0	0	0	0	4.64016e-05	3.87567e-05	0.000322695	2.79979e-05	0	5.55833e-05	8.22064e-05	4.02156e-05	0.000159172	0	6.26645e-05	0	8.50702e-05	0.000113295	0	0	0	0	0.000288517	0.000167785	5.69039e-05	0	0.000720958	0.000273224	0.000521105	0.000193211	0.000178521	0.000413628	3.47017e-05	0.000329846	3.51704e-05	0.000116778	0
Otu0105	Cupriavidus	0	0	0	0	0	0	0	0	0	0.000750334	0.0021863	0.00193759	0.00115026	0.00206532	0.00192659	0.00171686	0.00263545	3.22695e-05	0	0	5.55833e-05	0	0	0	0	0	0.00029391	0.000453708	0.000396533	0	0	0.000295561	0	0.000548182	0	0	0	0.000658266	0.000394657	0	0	0	0	0	0.000376967	0	0	0
Otu0106	Unclassified Planctomycetaceae	0.000930154	0.000358637	0.000707172	0.000264655	0	5.51785e-05	0.000448833	0.000779143	0.00113852	0	0.00103561	0.00149723	0.00157404	0	0.00192659	0.00176326	0.0011627	0.000258156	0	0.000870924	0.000250125	4.11032e-05	0.000160862	0.000676482	0	0	5.8782e-05	5.67135e-05	0.000453181	0	0.000196495	0	0	5.77034e-05	0.000167785	0.000256067	0.000273973	3.1346e-05	0	8.017e-05	1.93211e-05	0	8.70796e-05	0	0	0	0	0
Otu0107	Sphingomonas	0.00101471	0.00466228	0.00636455	0.00555776	0.00291938	0.00789053	0.00682226	0.00458496	0.00270398	0.000489349	0.000402739	0.000381646	0.00024216	0.000688439	0.000354898	0.000788827	0.000193783	0.000484043	0.000167987	0.000384231	0.00083375	0.00156192	0.000683664	0.000716275	0.00105018	0.000501316	0.00120503	0.00150291	0.000283238	0.00030615	0.000196495	0	0.00105266	0.00034622	0.000134228	0.000113808	0.000308219	0.00031346	0.000121433	0.00032068	0.000309137	0.000484558	0.00113203	0	0.000188484	0.000105511	0	5.67006e-05
Otu0108	Unclassified Planctomycetaceae	0.000253678	0.000657501	0.000825034	0.000926294	0	0.0267616	0.0273788	0.0258316	0.000379507	0.00163116	0.00112191	0.00146787	0.00105945	0.0017211	0.00273778	0.00157765	0.00290675	0.0026461	0.00078394	0.00140885	0.00152854	0.00328826	0.00510738	0.00254676	0.00609685	0.00056398	0.000617211	0.00207004	0.00121792	0.00413302	0.0034976	0.00333984	0.00198149	0	0	0	0	0	0	0	0	0	2.17699e-05	0	0.000424088	3.51704e-05	0	2.83503e-05
Otu0109	Unclassified Bacteria	0.00245222	0.000358637	0.000942896	0.000132328	0.00145969	0	8.97666e-05	0.000689242	0.0012334	0.000163116	0.000316437	0.000469718	0.00036324	0.00098963	0.000506997	0.000649622	0.000310053	0.000354965	0	5.12308e-05	0.00016675	0.000287722	0.000201078	0.000397931	0.000116686	0	0.000764166	0.000737275	0.000254914	0.000497493	7.85978e-05	0	0	0	0	0	0	0	0	0	0	0	0	0	0	0	0	0
Otu0110	Unclassified Rhizobiales	0.00126839	5.97729e-05	0.000648241	0.000396983	0	0.00038625	8.97666e-05	0.000239736	0.000189753	6.52465e-05	5.75341e-05	8.80721e-05	0	8.60548e-05	0.000202799	4.64016e-05	0	0.000193617	0	0.000307385	0.000138958	4.11032e-05	8.04311e-05	0.000238758	0	0	0.000176346	0	0.000481505	0.000153075	7.85978e-05	0	0.000154804	5.77034e-05	6.71141e-05	5.69039e-05	3.42466e-05	0	6.07165e-05	0	3.86421e-05	0	2.17699e-05	0	0	0	0.00058389	0
Otu0111	Unclassified Proteobacteria	0.000591916	0.000179319	0.00117862	0.000264655	0.00202111	0.000551785	0.0002693	0.000539407	0.000664137	6.52465e-05	8.63011e-05	0.000234859	0.00024216	0.000602384	0.000253498	0.000232008	0.000271297	9.68085e-05	0.00167987	2.56154e-05	0.000111167	8.22064e-05	0.000160862	0.000278552	0.000875146	0	5.8782e-05	8.50702e-05	0	7.65374e-05	7.85978e-05	0	0.000154804	0	0	0	0	0	0	0	0	0	0	0	0	0	0	0
Otu0112	Unclassified Enterobacteriaceae	0.000591916	0.000119546	0.000235724	0	0.00112284	0	0.000359066	0	4.74383e-05	6.52465e-05	0	0	0.00036324	0	0	0	0	6.4539e-05	5.59957e-05	5.12308e-05	0	0	0	0	0.000204201	0	5.8782e-05	8.50702e-05	0.000339886	3.82687e-05	0	0.0019507	3.09607e-05	2.88517e-05	3.3557e-05	0	0	3.1346e-05	3.03582e-05	4.0085e-05	7.72842e-05	0	0	0.000104105	0	0.000808919	0	0.000311853
Otu0113	Silanimonas	0	0.000239091	0.000471448	0.000529311	0.000112284	0.000220714	0	0.000179802	0.000237192	0	2.8767e-05	0	6.054e-05	4.30274e-05	0.000152099	0.000232008	0	0.000161348	0	5.12308e-05	2.77917e-05	0	8.04311e-05	3.97931e-05	5.83431e-05	9.39967e-05	8.81731e-05	0.000226854	0	0	3.92989e-05	0.000472897	0	0	0	0	0	3.1346e-05	0	0	1.93211e-05	2.5503e-05	4.35398e-05	0	0	0	0	0
Otu0114	Unclassified Bacteroidetes	0	0.000777047	0.000353586	0.000595474	0	0.000275893	0.0005386	0.000179802	0.000426945	0	0	0	0.00033297	4.30274e-05	0.000101399	9.28031e-05	3.87567e-05	0.000322695	0	0	8.3375e-05	0	0.000241293	0.000198965	0	0	0	0	0.000254914	0.000191344	0	0	0	0	0	2.84519e-05	0.00010274	0	0	0.000120255	3.86421e-05	0.000102012	0.000195929	0	0	0	0	0
Otu0115	Unclassified Bacteria	0	0.00041841	0.000530379	0.000132328	0.000224568	0.000220714	0.000179533	0.000449506	0.000616698	0	2.8767e-05	0	6.054e-05	0	0	0	3.87567e-05	9.68085e-05	0	0	0	0	0	0.000119379	0	0	0.000117564	5.67135e-05	2.83238e-05	0.000153075	0.000589484	0	6.19214e-05	0	0.000100671	2.84519e-05	0	3.1346e-05	6.07165e-05	0.00016034	0	2.5503e-05	0.000152389	0	4.71209e-05	0	0	0
Otu0116	Unclassified Proteobacteria	0	0.0048416	0.00441982	0.0038375	0.00359308	0.0165536	0.00996409	0.00662272	0.00659393	0	0.000575341	0.000528433	0.00096864	0.00116174	0.000608396	0.000278409	0.00112394	0.000451773	0.000195985	0.000461077	0.000250125	0.000411032	0.000241293	0.000676482	0.000641774	0	0.000382083	0.000538778	0.000651447	0.0006123	0.000392989	0	0.00108362	5.77034e-05	0.00033557	0.000170712	0.000410959	0.000188076	3.03582e-05	0.000440935	0.000618274	0.00109663	0.00141504	0.000347017	0.000471209	0.000492386	0.000233556	0.000425254
Otu0117	Unclassified Alphaproteobacteria	0	0.000119546	0.000530379	0.000198491	0.000224568	0.000662142	0.000359066	0.000449506	0.000189753	0	8.63011e-05	0.000234859	3.027e-05	0	0.000101399	0.000417614	0.000193783	0.000161348	0.00039197	0.000179308	0.00016675	0.000246619	0.000442371	7.95862e-05	5.83431e-05	0	5.8782e-05	8.50702e-05	2.83238e-05	0.000459225	0.000392989	0	0.000402489	8.65551e-05	3.3557e-05	5.69039e-05	0.00010274	0	0	8.017e-05	0	0	6.53097e-05	0	0	0	0	0
Otu0118	Unclassified Hyphomicrobiaceae	0.00169119	0	0.000235724	0.000330819	0.00123512	0.000110357	0.000987433	0.000149835	0.000759013	3.26232e-05	0	5.87147e-05	0.00024216	0	5.06997e-05	0.000139205	0.000155027	6.4539e-05	0	0	0	0	0.000120647	7.95862e-05	0.000145858	0.000657977	0	0	0	0	0	0	0.000154804	0	0.000167785	8.53558e-05	3.42466e-05	0	0	0	1.93211e-05	5.10061e-05	8.70796e-05	0	0	0	0	0
Otu0119	Unclassified Acetobacteraceae	0.00101471	0.000597729	0.000412517	0	0.000898271	0.000441428	0.0002693	0.000209769	0.000806452	0	0	8.80721e-05	0	0.00017211	0.000101399	0.000139205	0	3.22695e-05	0	0	5.55833e-05	0.000164413	0	0.000159172	0.000320887	0	2.9391e-05	0.000113427	0	0	0	0	0.000309607	8.65551e-05	0.000234899	5.69039e-05	3.42466e-05	6.2692e-05	0	0.000200425	5.79632e-05	0	6.53097e-05	0	0.000141363	0	0.000233556	0
Otu0120	Unclassified Rhizobiales	0	0.00143455	0.00135541	0.000793966	0	0.00198643	0.000628366	0.000689242	0.00279886	0	0	0	0	8.60548e-05	0.000101399	9.28031e-05	0	0	0	5.12308e-05	2.77917e-05	0.000246619	0.000321724	0.000238758	2.91715e-05	0	0	0.00017014	0	3.82687e-05	0	0	0	0.000259665	0.000134228	0.000455231	0.000719178	3.1346e-05	0.000364299	0	0.000193211	0.000280534	2.17699e-05	0	0.000141363	0	8.75836e-05	5.67006e-05
Otu0121	OD1_genus_incertae_sedis	0.000422797	0.000597729	0.00129648	0.000264655	0.000224568	5.51785e-05	0.000179533	0.000359604	0	0.000456725	0.000115068	0	9.081e-05	0	5.06997e-05	9.28031e-05	3.87567e-05	0.000258156	0	0	0.000138958	8.22064e-05	0.000160862	0.000278552	0	0	0.000146955	0.000311924	0	0.000459225	0.000117897	0	0.000123843	0	0	2.84519e-05	0	0	0	0	0	0	0	0	0	0	0	0
Otu0122	Brevundimonas	0	0.000179319	0.000117862	6.61638e-05	0	0.000331071	0.0005386	0.000269703	4.74383e-05	0	0.000115068	5.87147e-05	6.054e-05	4.30274e-05	0	0	0.000426324	6.4539e-05	0.00039197	0	0.000305708	0	0	0.000119379	0.000408401	0	2.9391e-05	0	8.49714e-05	0	0.000196495	0	0	0	0	0	3.42466e-05	9.4038e-05	0	0	1.93211e-05	2.5503e-05	4.35398e-05	0	0.000188484	0	0	0
Otu0123	Roseomonas	0.000507357	0.000119546	0.000942896	0.000595474	0.000898271	0.000882856	0.000628366	0.00146838	0.00128083	0	5.75341e-05	0	0.00012108	4.30274e-05	0.000152099	0.000510417	0	0	0	0.000179308	0.000111167	0.00012331	0.000120647	3.97931e-05	0.000116686	0	2.9391e-05	2.83567e-05	5.66476e-05	0.000191344	7.85978e-05	0	0.000247686	0	0	0	6.84932e-05	0	0	8.017e-05	0	0	8.70796e-05	0	0	0	0	0
Otu0124	Unclassified Acetobacteraceae	0	0.000119546	0.000530379	6.61638e-05	0	0.000220714	0.0002693	0.000779143	9.48767e-05	0	0.000172602	8.80721e-05	0	0.00017211	0.000101399	0	3.87567e-05	0.000161348	0	5.12308e-05	8.3375e-05	4.11032e-05	0	0	0	0	5.8782e-05	2.83567e-05	0	0	3.92989e-05	0	6.19214e-05	5.77034e-05	0	5.69039e-05	0	0	0	0	7.72842e-05	0	2.17699e-05	0	0	0	0	2.83503e-05
Otu0125	Unclassified Betaproteobacteria	0.00321326	0.00215182	0.00524486	0.00152177	0.00314395	0.000551785	0.00206463	0.00224753	0.00185009	0.000782958	0.000575341	0.000880721	0.00024216	0.00133385	0.000557696	0.000835228	0.000426324	0.000613121	0.000419968	0.000486693	0.000528042	0.000657651	0.000402156	0.000119379	0	0.000814638	0.0012932	0.000510421	0.00138787	0.000229612	0.000668081	0.000591121	0.000185764	0	0	2.84519e-05	0	0	0	4.0085e-05	0	0	0	0	0	0	0	0
Otu0126	Unclassified Bacteria	0.00160663	0.000777047	0.00141434	0.00152177	0.00437907	0.00132428	0.00197487	0.00119868	0.00227704	0.000130493	0.00077671	0.000704577	0.00202809	0.000774493	0.000557696	0.00088163	0.000852647	0.00064539	0.000839936	0.000666001	0.000389083	0.000452135	0	0.000596896	0.000612602	0	0.000881731	0.000453708	0.000339886	0.000229612	0.000550185	5.91121e-05	0.000154804	0	0	5.69039e-05	3.42466e-05	0	0	0	0	0	0	0	0	0	0	0
Otu0127	Unclassified Bacteria	0	0.000717274	0.000294655	0.000396983	0.000673703	0.000496607	0.000359066	0.00101888	0.000426945	0	0.000115068	2.93574e-05	0	0.000215137	0.000202799	0.000371212	0.00023254	6.4539e-05	0	0	0.000138958	0.000328826	0.000281509	0.000437724	5.83431e-05	3.13322e-05	0.000264519	0.000141784	0	0	0	0	0	0.000403924	0.000402685	0.000227615	0.000308219	0.000125384	0.000364299	0.00056119	1.93211e-05	0.00025503	0.000283009	0	0	0	0	0
Otu0128	Unclassified Bradyrhizobiaceae	0	0	0	0	0	0	0	0	0	0	5.75341e-05	2.93574e-05	0	0	0	0.000139205	7.75134e-05	0	0	0	0	0	0	0	8.75146e-05	0	0	8.50702e-05	0	7.65374e-05	0	0	0	0	6.71141e-05	0	0	0	6.07165e-05	0	0	0.000229527	0	0	9.42418e-05	3.51704e-05	0	0.000113401
Otu0129	Methylophilus	0.00143751	0.00203228	0.00288762	0.0023819	0.00157197	0.00446946	0.00224417	0.0029967	0.00564516	0.000391479	0.000460273	0.000322931	0.00042378	0.000817521	0.000608396	0.00106724	0.000620107	0.000580851	0.000223983	0.000999001	0.00083375	0.00106868	0.0010456	0.00191007	0.000670945	0.000469984	0.00149894	0.000964129	0.000764743	0.00103326	0.00125757	0.000532009	0.000185764	5.77034e-05	0.000100671	0.000426779	0.000273973	0	6.07165e-05	0.00024051	0.000135247	0.000153018	0.000217699	0	0	0	0	0.000141751
Otu0130	Dongia	0.000676476	0.000179319	0.000471448	0.000198491	0	0.000606964	0.0010772	0.000359604	0	0	0	0	0.00042378	0	0.000253498	4.64016e-05	7.75134e-05	0	0	0	0.000138958	0	0.000201078	3.97931e-05	0	0	0	5.67135e-05	2.83238e-05	0.00030615	0.00035369	0.000236449	0.000154804	0	0	0	0.00010274	0	0	0	3.86421e-05	2.5503e-05	0	0	0	0	0	0
Otu0131	Unclassified Alphaproteobacteria	0.000338238	0.000239091	0.000235724	0.000264655	0.00235796	0.00038625	0.0002693	0.000179802	0.00056926	0.000717711	5.75341e-05	5.87147e-05	6.054e-05	0	0.000253498	0.000232008	7.75134e-05	6.4539e-05	0	5.12308e-05	0	8.22064e-05	4.02156e-05	0.000278552	8.75146e-05	0	0	0.000141784	0	7.65374e-05	7.85978e-05	0	0.000340568	8.65551e-05	0.000268456	2.84519e-05	0.00010274	6.2692e-05	3.03582e-05	8.017e-05	1.93211e-05	0.000153018	0.000130619	6.94035e-05	0	0	0	0
Otu0132	Unclassified Proteobacteria	0.000676476	0.00083682	0.00111969	0.00119095	0.00179654	0.00160018	0.00143627	0.0028169	0.00109108	9.78697e-05	5.75341e-05	2.93574e-05	0.00099891	0.000301192	0.000456297	0.000185606	7.75134e-05	0	0	0.000204923	0.000138958	0.000287722	8.04311e-05	0.000159172	0.000204201	0	0.000323301	0.000453708	0.000283238	0.000344419	0.000196495	0.000236449	0.000464411	0	0	0	3.42466e-05	0	0	0	0	0	0	0	0	0	0	0
Otu0133	Unclassified Proteobacteria	0.000930154	0.000239091	0.000117862	0.000132328	0	0.000110357	0.000359066	0.000239736	0.00028463	0	2.8767e-05	0.000234859	0.00024216	0	0	0	0	0.000161348	0	2.56154e-05	8.3375e-05	0	0	7.95862e-05	0	0	2.9391e-05	0	0.000198267	3.82687e-05	0.000275092	0	0	0	0	0	0	0	0	0	0	0	0	0	0	0	0	0
Otu0134	Unclassified Bacteria	0.000422797	0	0.00117862	6.61638e-05	0.000673703	0	0.000628366	0.00050944	0	0	0.000345205	5.87147e-05	0.00081729	0.000387247	5.06997e-05	0	0	0.000193617	0	0.000819693	5.55833e-05	4.11032e-05	0	0	0.000116686	0	0.000235128	0	5.66476e-05	0	0.000117897	0	0	0	0	0	0	0	0	0	0	0	0	0	0	0	0	0
Otu0135	Unclassified Alphaproteobacteria	0.00152207	0.000298864	0.00153221	0.00125711	0.00291938	0.00215196	0.00224417	0.00344621	0.00170778	0.000489349	0.000172602	0.000205502	0.00054486	4.30274e-05	0.000152099	0.000232008	0.000310053	9.68085e-05	0	0.000333	0.0003335	0.00012331	8.04311e-05	0.000278552	0.000175029	0.000125329	0.000117564	0.000141784	0.000396533	7.65374e-05	7.85978e-05	0	0	5.77034e-05	3.3557e-05	0	0	0	0	0	1.93211e-05	0	0.000152389	0	9.42418e-05	3.51704e-05	0	0
Otu0136	Unclassified Betaproteobacteria	0	0.000119546	0.000235724	0.000264655	0.00157197	0.000496607	0.0005386	0.000449506	0.000237192	6.52465e-05	0.000115068	0	3.027e-05	0.000129082	0.000253498	0	3.87567e-05	0	8.39936e-05	0	2.77917e-05	4.11032e-05	0.000120647	0	0	0	0.000264519	8.50702e-05	2.83238e-05	3.82687e-05	0	0	0	0	0	0.00014226	0	0	0	0	1.93211e-05	0	0	0	0	0	0	0
Otu0137	Mesorhizobium	0	0	0	0	0	0	0.0002693	0	0	0	0	0	0	0	0	0	0	0.000129078	0.000503962	0	0	0	0	0	0.000204201	0	0.000146955	0.000113427	0	3.82687e-05	0	0	0	0	0.000402685	0.000654394	0.000342466	0	3.03582e-05	0.00156331	0.00301409	0.000357043	0.00176336	0	0.000141363	0.000175852	0.00402884	2.83503e-05
Otu0138	Unclassified Bacteria	0.00177575	0.00119546	0	0	0.00168426	0.000441428	0.000179533	0.000479473	0.00147059	0	8.63011e-05	0.000264216	0.00024216	0.000215137	0.000253498	0	0.000852647	0.000225887	0	0	0.000277917	0.000164413	0.000603233	0.000437724	0	0.000250658	0	0.000538778	0.000339886	0.000153075	0	0	0	0.000115407	0.000201342	0.000170712	0.000479452	0	0	0	0.000115926	5.10061e-05	0.000326548	0	0	0	0	0
Otu0139	Unclassified Proteobacteria	0.00126839	0	0.000117862	0	0	5.51785e-05	0.0002693	0.000269703	4.74383e-05	0	0	2.93574e-05	0	0	0	0	7.75134e-05	6.4539e-05	0	0	0.000194542	0.000164413	0.000120647	0.000119379	0	0	0.000235128	8.50702e-05	0	7.65374e-05	0	0	0	8.65551e-05	0	2.84519e-05	0	3.1346e-05	3.03582e-05	4.0085e-05	1.93211e-05	2.5503e-05	0.000130619	0	0	0	0	0
Otu0140	Unclassified Bacteria	0.00372062	0.000657501	0.00235724	0.000727802	0.00527734	0.00160018	0.00152603	0.00152832	0.00275142	0	0.000172602	0.000352288	0.00069621	0.000129082	0.000202799	0.000371212	3.87567e-05	0.000354965	0	0	0.000138958	0.000328826	0.00036194	7.95862e-05	0.000233372	0	5.8782e-05	0.000396994	0.000113295	0.000420956	0.000235793	0	0.000278646	5.77034e-05	3.3557e-05	0.000483683	0.000513699	3.1346e-05	0	0.000120255	1.93211e-05	7.65091e-05	0.000326548	0	0	0	8.75836e-05	0
Otu0141	Spartobacteria_genera_incertae_sedis	0	0	0.000412517	0.000132328	0	0	8.97666e-05	2.9967e-05	0	0	5.75341e-05	2.93574e-05	0	0	0.000202799	4.64016e-05	0	0	0	0.00122954	8.3375e-05	0.000369929	0.000482587	0.000318345	0	0.000344655	5.8782e-05	2.83567e-05	0.000113295	0	0.000628783	0	0.0017338	2.88517e-05	3.3557e-05	2.84519e-05	3.42466e-05	6.2692e-05	0.000121433	0	1.93211e-05	7.65091e-05	0	0	0	0	5.8389e-05	0
Otu0142	Unclassified Rhodospirillales	0.00177575	0.00083682	0.00100183	0.000132328	0.000673703	0.00165536	0.000628366	0.00029967	0.00194497	0.000456725	0	0.000440361	0	0	0.000101399	0	7.75134e-05	0	0	2.56154e-05	0.000111167	0	0	0	5.83431e-05	0	0	8.50702e-05	0.000141619	0.000153075	3.92989e-05	0	0	0.000519331	0.000100671	0.000227615	0.000239726	0.000125384	9.10747e-05	0.00024051	0.000135247	0.000153018	0.000370088	3.47017e-05	0.000141363	0	0	0
Otu0143	Unclassified Betaproteobacteria	0	0	0	0	0	0	0	0	0	0	0	0	0	0	0	0	0	0	0	0	0	0	0	0	0	0	0	0	0	0	0	0	0	0	0	0	0	0.000219422	0	0	0	2.5503e-05	4.35398e-05	0	9.42418e-05	0	2.91945e-05	0
Otu0144	Unclassified Proteobacteria	0.00211399	0.001315	0.000235724	0.000926294	0.00123512	0.00237268	0.0005386	0.000839077	0.000948767	0	5.75341e-05	2.93574e-05	0.00072648	0	5.06997e-05	0	0	0	0	0	0.000305708	8.22064e-05	0.000120647	0.000119379	0	0	0	0	0	0	0	0	0	0.000259665	0.000167785	0.00014226	6.84932e-05	3.1346e-05	0.000121433	0.000120255	0.000270495	0.00025503	0.000304778	0.000971649	9.42418e-05	0.000633067	0	0.00198452
Otu0145	Sphingomonas	0	0	0	0	0	0	0	0	0	0	0	2.93574e-05	0	0	5.06997e-05	9.28031e-05	0	0	2.79979e-05	0	0	0.00012331	0.000160862	7.95862e-05	2.91715e-05	0	2.9391e-05	0	0	0.000153075	0.000157196	0	0	0	0	0	0	0	0	0	0	0	0	0	0	0	0	0
Otu0146	Unclassified Proteobacteria	0	0.000179319	0.00147327	0.000132328	0.000336852	0.000165536	0.0005386	0.000389571	0.000521822	3.26232e-05	0.000115068	0.000146787	0	0.000860548	0	9.28031e-05	0.00034881	0	0	0	5.55833e-05	4.11032e-05	8.04311e-05	0	0	0	0.000617211	0.000113427	0	0.00030615	0	0	0	0	0	0	3.42466e-05	0	0	0	3.86421e-05	0	0	0	0	0	0	0
Otu0147	Unclassified Bacteriovoracaceae	0.00135295	0.00107591	0.00241617	0.00211724	0.00202111	0.00160018	0.00278276	0.00311657	0.00185009	0.000195739	0.000632875	0.000939436	0.00045405	0.000860548	0.000608396	0.000928031	0.000736377	0.000742199	0	0.000768462	0.000389083	0.000780961	0.000603233	0.000636689	2.91715e-05	0.00115929	0.000323301	0.000822345	0.000113295	0.000535762	0.000668081	0	0.000774018	0	0	0	0	0	0	0	0	0	2.17699e-05	0	0	0	0	0
Otu0148	Sulfuricella	0.000253678	0.000478183	0.000766103	0.0014556	0.000561419	0.00115875	0.0005386	0.000419539	0.00175522	0	0.000143835	0.000293574	0	4.30274e-05	0	0.000232008	3.87567e-05	3.22695e-05	0	0.000230539	2.77917e-05	4.11032e-05	4.02156e-05	3.97931e-05	0	0	0	0.000226854	0	0	0	0	0	2.88517e-05	6.71141e-05	5.69039e-05	3.42466e-05	0	0	0	9.66053e-05	5.10061e-05	2.17699e-05	0	0	0	0	0
Otu0149	Bdellovibrio	0.00160663	0.000896593	0.00218045	0.000992457	0.00258253	0.00270375	0.002693	0.00302667	0.00232448	0.000717711	0.000805477	0.000763292	0.00027243	0	0.000557696	9.28031e-05	0.00151151	0.000709929	0	0.000204923	0.000389083	0.000452135	0.000281509	0.000795862	0.000525088	0	0.00108747	0.000510421	0.00124625	0.000191344	0.00106107	0.00384229	0.000247686	0	0	0	0	0	0	0	1.93211e-05	0	0	0	0	0	0	0
Otu0150	Unclassified Bacteria	0.00109927	0.000239091	0.000294655	0.000264655	0.000785987	0.000110357	0.000179533	0.000329637	0.000332068	0	5.75341e-05	0	6.054e-05	0	0.000152099	0	7.75134e-05	0	0	0	5.55833e-05	0	0	0	0	0	0	8.50702e-05	0.000141619	3.82687e-05	0	0	0	0	0	0	0	0	0	0	0	0	0	0	0	0	0	0
Otu0151	Unclassified Acetobacteraceae	0.000169119	0.000298864	0.000648241	0.000529311	0.000673703	0.000551785	0.000179533	0.000629308	0.000806452	0	5.75341e-05	0.000205502	0.00021189	0.000215137	0.000152099	0	0	9.68085e-05	0	0	0.000250125	0	0.000201078	0	0	0	5.8782e-05	0	0.000198267	0	0.000117897	0	0	0	0	0	0	0	0	0	0	0	0	0	0	0	0	0
Otu0152	Unclassified Rhizobiales	0.000422797	0.000119546	0.00100183	0.000463147	0.00179654	0.000882856	0.000448833	0.000149835	0.000616698	0	0	2.93574e-05	6.054e-05	0	0	0	7.75134e-05	0	0	0	2.77917e-05	8.22064e-05	0	0.000119379	0	0	0	0.000141784	5.66476e-05	0	3.92989e-05	0	0	0.00017311	0.000234899	8.53558e-05	0	3.1346e-05	0	0	1.93211e-05	5.10061e-05	0.000152389	0	0	0	0	0
Otu0153	Unclassified Deltaproteobacteria	0.00262134	0.00173341	0.00312334	0.00178642	0.000898271	0.00242785	0.0040395	0.00410548	0.00189753	0.000456725	0.00097808	0.000352288	0.00208863	0.00133385	0.00101399	0.00060322	0.00069762	0.000419504	0	0.000358616	0.000722584	0.000575445	0.000201078	0.000716275	0.000612602	0.00228725	0.000499647	0.000368637	0.000538152	0.000382687	0.00106107	0.000325117	0.00126939	2.88517e-05	3.3557e-05	0	3.42466e-05	0	3.03582e-05	0	0	7.65091e-05	0.000195929	0	0	0	2.91945e-05	0
Otu0154	Unclassified Sphingobacteriales	0	0	0	0	0	0	0	0	0	6.52465e-05	2.8767e-05	0	0.00015135	0.00589475	0.00197729	0.00222727	0.00290675	0.00174255	0.0012599	0.00135762	0.00152854	0.000945374	0.0012869	0.00139276	0.00183781	0	0	0	0	0	0	0	0	0	0	0	0	0	0	0	0	0	0	0	0	0	2.91945e-05	0
Otu0155	Unclassified Burkholderiales	0	0	0	0	0	0	0	0	0	3.26232e-05	0	2.93574e-05	0	0.000129082	0	0	0	9.68085e-05	0	0	8.3375e-05	0.00012331	8.04311e-05	0	0.000175029	3.13322e-05	0.000117564	0	5.66476e-05	0	0	0	0	0	0	0	0	0	0	8.017e-05	0	0	0	0	0	0	0	0
Otu0156	Unclassified Bacteria	0.00152207	0.0022116	0.000766103	0.00595474	0.00482821	0.00176571	0.0018851	0.00185796	0.000142315	0	0.000115068	0	0	8.60548e-05	0.000101399	4.64016e-05	0	9.68085e-05	0	2.56154e-05	0	4.11032e-05	8.04311e-05	0	0.000204201	0	0	5.67135e-05	0	3.82687e-05	0	0	0	0	0	0	0	0	0	0	0	0	0	0	0	0	0	0
Otu0157	Unclassified Rhodocyclaceae	0	0.00125523	0.000294655	0.000661638	0	0.000441428	0.000897666	0.000119868	0.000474383	0	0	2.93574e-05	0	0	0	0	0	0	0	0	0	0	0	7.95862e-05	0	0	2.9391e-05	0.000113427	0	0	0	0	0	2.88517e-05	0	0	0	3.1346e-05	6.07165e-05	0	0	5.10061e-05	2.17699e-05	0	0	0	0	0
Otu0158	Unclassified Alphaproteobacteria	0	0.000119546	0.000235724	0	0.000224568	5.51785e-05	0.0002693	0.000119868	0.000142315	0	5.75341e-05	0.000117429	6.054e-05	8.60548e-05	0	0.000185606	0	9.68085e-05	0.000587955	0	0	8.22064e-05	0	0	0	0	0.000117564	0	2.83238e-05	0.000114806	0.00035369	0	0	0	3.3557e-05	0	0	0	0	0	0	0	0	0	0	0	0	0
Otu0159	Hyphomicrobium	0.000338238	5.97729e-05	0	0	0	0.000110357	0.000179533	2.9967e-05	0	0	5.75341e-05	0	0	0	0.000101399	4.64016e-05	0	0.000225887	0	0	2.77917e-05	8.22064e-05	0	0	0	0	0	0	0	0	0	0	0	2.88517e-05	6.71141e-05	0	0.000136986	0.000125384	6.07165e-05	0.00016034	0.000231853	0	6.53097e-05	0	0	0.000175852	2.91945e-05	0
Otu0160	Bdellovibrio	0.00338238	0.00101614	0.00524486	0.000793966	0.00370537	0.00160018	0.00206463	0.00320647	0.00218216	0.00176165	0.00103561	0.000381646	0.00163458	0.000301192	0.00162239	0.000928031	0.00046508	0.000613121	0.000111991	0.00107585	0.000583625	0.000452135	0.000482587	0.000318345	0	0.00103396	0.00085234	0.00017014	0.000141619	0.00133941	0.00106107	0.000502453	0	0	0	0	0	0	0	0	0	0	0	0	0	0	0	0
Otu0161	Legionella	0.00295958	0.000777047	0	0.000264655	0.00269481	0.00110357	0.0010772	0.00131855	0.00298861	0	0	0	0	0	0	0.000139205	0	0	0	0	2.77917e-05	0.00012331	8.04311e-05	3.97931e-05	5.83431e-05	0	8.81731e-05	5.67135e-05	0	0	3.92989e-05	0	0	0.000490479	0.000671141	0.000483683	0.000787671	6.2692e-05	0.000121433	0.00040085	0.000115926	0.00025503	0.000217699	0	0	0	0.000437918	0.00209792
Otu0162	Unclassified Planctomycetaceae	0.000591916	0.000119546	0	0	0	5.51785e-05	0	0.000239736	0.00113852	0.000913451	0.000201369	0.000146787	0.00027243	0	0.000304198	0.000185606	0.00023254	0.000387234	0	0	8.3375e-05	0.000246619	0.000201078	0.000238758	0	0	0	0.000595491	0.000453181	0.000727106	0.000235793	0	0	5.77034e-05	0.000268456	0.000170712	0.000239726	0	3.03582e-05	0.00040085	0.000193211	2.5503e-05	0.000130619	0	0	0	0.000379529	0
Otu0163	Unclassified Betaproteobacteria	0.00101471	0.000478183	0.00141434	0.000330819	0.000673703	0.000551785	0.000448833	0.00125862	0.000521822	0.000130493	5.75341e-05	8.80721e-05	6.054e-05	0.000817521	5.06997e-05	9.28031e-05	0.000271297	0	0.0012879	0	0.00016675	0.000246619	0.000160862	0.000159172	0.000525088	0.00162928	8.81731e-05	0	0	3.82687e-05	0	5.91121e-05	0	0	0	0	6.84932e-05	0	0	4.0085e-05	7.72842e-05	0.000127515	4.35398e-05	0	4.71209e-05	0	0	0.000453605
Otu0164	Bacteriovorax	0.000253678	0.000478183	0.00253403	0.00152177	0.000112284	0.000606964	0.0016158	0.000599341	0.00085389	0.000326232	0.000632875	0.000528433	0.0003027	0.000258164	0.000456297	0.000649622	0.000387567	0.000258156	0.00411569	0.000896539	0.000222333	0.000205516	0.000201078	0	0.000291715	0	0	0.000340281	0	0.000382687	0.000196495	0	0.000185764	0	0	0	0	0	0	0	0	0	2.17699e-05	0	0	0	0	0
Otu0165	Unclassified Chitinophagaceae	0.00135295	0.000657501	0.000530379	0.000198491	0	0.000165536	0.000359066	0.000749176	0.000521822	0	0.00048904	0.000293574	0	0	0	0.000417614	0.000310053	9.68085e-05	0	0	0	8.22064e-05	0.000201078	0.000318345	0.000116686	0	5.8782e-05	0.000396994	0	0.000114806	0	0	0	0	0	0	0	0	0	0	0	0	0	0	0	0	0	0
Otu0166	Flavobacterium	0	0.000239091	0.000117862	0.000396983	0	5.51785e-05	0	5.99341e-05	9.48767e-05	0	0	0	0.00024216	0	0	0	0	0	0	0	0	0	0	0	0.000350058	0	0	5.67135e-05	0	0	0	0	0	0	0	0	0	0	0	0	0	0	0	0	0	0	0	0
Otu0167	Unclassified Alphaproteobacteria	0.00202943	0.00107591	0.00147327	0.00205108	0.000336852	0.00137946	0.00125673	0.000869044	0.000711575	0	0	2.93574e-05	0.0003027	0	0.000101399	0.000139205	3.87567e-05	0	8.39936e-05	0	0.000138958	4.11032e-05	0	0.000119379	0.00110852	0	0	2.83567e-05	8.49714e-05	0.000344419	7.85978e-05	0.000709346	0	0.000461627	0.000536913	0.000369875	0.000410959	9.4038e-05	0.000394657	0.000280595	0.00017389	0.000153018	0.000130619	0	0	0.000316534	2.91945e-05	0.00099226
Otu0168	Unclassified Planctomycetaceae	0.000676476	0.000478183	0.00141434	0.000198491	0.00258253	0.000938035	0.000448833	0.000569374	0.000948767	0.000978697	0.000402739	0.000469718	0.00018162	8.60548e-05	0.000152099	0.000556819	0.00046508	0.00064539	0.00176387	0.00061477	5.55833e-05	4.11032e-05	0.000201078	0.000198965	0	0	0.00138138	0.00133277	2.83238e-05	0.00118633	0.00145406	0	0	0.000144259	0.000268456	0.000455231	0.000205479	0.000125384	0.000182149	0.000440935	0.000115926	0.000204024	0.000174159	0	4.71209e-05	0.00502937	0	0
Otu0169	Unclassified Sphingomonadaceae	0	0	5.8931e-05	0	0.000112284	5.51785e-05	0	8.99011e-05	0.000379507	0	0.000172602	2.93574e-05	0	0	0.000101399	0	0.00023254	6.4539e-05	5.59957e-05	0	5.55833e-05	8.22064e-05	0	0	0	0	5.8782e-05	0	2.83238e-05	0	0	0	0	0	0	0	0	0	0	0	0	2.5503e-05	0	0	0	0	0	0
Otu0170	Gp6	0	0	0	0	0	0	0	0	0	0	0	0	0	0	0	0	0	0	0	0	0	0	0	0	0	0	0	0	0	0	0	0	0	0	0	0	0	0	0	0	0	0	0	0	0	0	0	0
Otu0171	Unclassified Bacteria	0.00219855	0.000298864	0.000766103	6.61638e-05	0.000112284	0.000441428	0.000359066	0.000329637	0.000426945	0	8.63011e-05	0.000616505	0.0003027	0	0	0.000324811	0.000387567	0.000290426	0.000223983	0.000640385	0.000194542	0.000205516	4.02156e-05	7.95862e-05	0	0	0	0.000425351	8.49714e-05	0	0	0	0	0	3.3557e-05	0.00014226	3.42466e-05	0	3.03582e-05	0	1.93211e-05	2.5503e-05	6.53097e-05	0	0.000235605	0	0	0.000113401
Otu0172	Unclassified Bacteria	0.000591916	0.000537956	0.000117862	0.000661638	0	0.000938035	0	0.000539407	9.48767e-05	0	8.63011e-05	0	0.00012108	0	0	0	0.00011627	3.22695e-05	0	0	8.3375e-05	8.22064e-05	0	7.95862e-05	0	0	0.000117564	0	0	0	0	0	0	2.88517e-05	3.3557e-05	5.69039e-05	6.84932e-05	6.2692e-05	6.07165e-05	8.017e-05	0.000115926	0	0.000152389	0	0	0	0	0
Otu0173	Methylomonas	0.00126839	0.00119546	0.00218045	0.000264655	0.000112284	0.00104839	0.00116697	0.00155829	0.000664137	0.000424102	8.63011e-05	0	0.00033297	0	0.000405597	0.000139205	0	3.22695e-05	0	0	0.00016675	8.22064e-05	0	0	0	0	8.81731e-05	5.67135e-05	0	0	3.92989e-05	0	0	0	0	0	0	0	0	0	0	0	4.35398e-05	0	0	0	0	0
Otu0174	Unclassified Rhodospirillales	0.000507357	0.000239091	0.000235724	0	0.000561419	0	0.000718133	0.000269703	0.00028463	9.78697e-05	8.63011e-05	0.000146787	0	4.30274e-05	0.000101399	4.64016e-05	0.00034881	9.68085e-05	0	0.000384231	0	4.11032e-05	0.000120647	0	0.000145858	0	0.000146955	0.000141784	8.49714e-05	0	0.000117897	0	0	0	3.3557e-05	0	0	0	0	0	1.93211e-05	2.5503e-05	0	0	0	0	0	0
Otu0175	Unclassified Bacteria	0.00372062	0.00113568	0.00100183	0.00138944	0.00134741	0.00115875	0.00305206	0.00242733	0.00189753	0.00104394	0.000115068	0.000264216	0.00045405	8.60548e-05	0.000202799	9.28031e-05	7.75134e-05	6.4539e-05	0.000979926	0	5.55833e-05	0.000164413	0.000120647	0.000159172	2.91715e-05	0	0.000675993	8.50702e-05	0.000141619	0.000153075	0	0.00014778	9.28821e-05	5.77034e-05	3.3557e-05	0.000113808	3.42466e-05	3.1346e-05	0	0	0	0	2.17699e-05	0	0	0	0	0
Otu0176	Microbacterium	0	0	0	0	0	0	0	0	0	6.52465e-05	0.000115068	0	0	0	5.06997e-05	0	0.00011627	0.000225887	0.000307977	0.000256154	0.000111167	0.000287722	0.000281509	0.000437724	5.83431e-05	0.000250658	5.8782e-05	0.000396994	5.66476e-05	0.000267881	0.000196495	0.000118224	0.000247686	0	0	0	3.42466e-05	0	0	0	0	7.65091e-05	0	0	0	0	0	5.67006e-05
Otu0177	Unclassified Syntrophaceae	0.000169119	0.000537956	0.000176793	0.000396983	0	0.000331071	0	0.000149835	0.000237192	0.000130493	0	2.93574e-05	0	0	0	0.000139205	0	0	0	0	0	0	0	0	0	0	0	0	0	3.82687e-05	0.000275092	0	0	0	0	2.84519e-05	3.42466e-05	6.2692e-05	0	8.017e-05	5.79632e-05	0	0.000108849	0	0	0	0	0
Otu0178	Unclassified Proteobacteria	8.45594e-05	0	0.00058931	0	0	0.000331071	8.97666e-05	0.00029967	0.00028463	0	0	0.000146787	0	0.000430274	0	4.64016e-05	0.00011627	0	0	0	2.77917e-05	0	0	0	0.000670945	0	0	0	0	0	0	0	0	5.77034e-05	0	2.84519e-05	0	0	0	0	0	0	0	0	0	0	0	0
Otu0179	Geothrix	0	0.00125523	0.000176793	6.61638e-05	0	0.000551785	8.97666e-05	0.000719209	0.00128083	0	0.00028767	5.87147e-05	0.00012108	8.60548e-05	0	9.28031e-05	0.000193783	9.68085e-05	0	7.68462e-05	0.000111167	4.11032e-05	0	0	0	0	0.000235128	0.00017014	0	0.000191344	0.00035369	0	0.000123843	0.000144259	0	0	0.000136986	0	0	0	0	5.10061e-05	8.70796e-05	0	0	0	0	0.000765458
Otu0180	Unclassified Comamonadaceae	0	0	0	0	0	0	0	0	0	6.52465e-05	2.8767e-05	0	0	0	0	4.64016e-05	0	3.22695e-05	5.59957e-05	0	2.77917e-05	4.11032e-05	0	0	2.91715e-05	0	0	2.83567e-05	0	0	0	2.95561e-05	0	0	0	0	0	0	0	8.017e-05	0	0	0	0	0	0	0	0
Otu0181	Unclassified Bacteria	0.000761035	0.00274955	0.000117862	0.00337435	0.000112284	0.000110357	0.00116697	0.000329637	0	0	0	0	0	0	0	0	0	0	0	0	0	0	0	0	0	0	0	2.83567e-05	0	0	0	0	0	0	0	0	0	0	0	0	0	0	0	0	0	0	0	0
Otu0182	Unclassified Caulobacteraceae	0	0	0	0	0	0	0	0.00029967	0	0.000228363	0.000316437	0.000763292	9.081e-05	0.000258164	0.000202799	0.000556819	0	0.000225887	0.000615953	0.000204923	0.000528042	0.000780961	0.000683664	0.000795862	0.00172112	0.00297656	0.00141077	0.00172976	0.0017844	0.00141594	0.00188635	0.00135958	0.000990743	0	3.3557e-05	0	6.84932e-05	0	0	0.00016034	0	7.65091e-05	6.53097e-05	0	4.71209e-05	0	5.8389e-05	0
Otu0183	Unclassified Gammaproteobacteria	0.00160663	5.97729e-05	0.000235724	0.000595474	0.00145969	0.000441428	0.00170557	0.000539407	0.000711575	0	0	0	0	0	0	0.000139205	7.75134e-05	0	0	0	0	0	4.02156e-05	0	0	0	0	0	0.000169943	0.000267881	0	0	0	0.000144259	0.000167785	0.000170712	6.84932e-05	9.4038e-05	0	0.00016034	3.86421e-05	2.5503e-05	6.53097e-05	0	0	0	0	0
Otu0184	Unclassified Caulobacteraceae	8.45594e-05	0.00113568	0.000942896	0.000330819	0	0.000882856	0.000807899	0.000659275	0.0012334	3.26232e-05	2.8767e-05	0	0.00042378	4.30274e-05	0.000101399	0.000139205	3.87567e-05	3.22695e-05	8.39936e-05	0.000128077	2.77917e-05	8.22064e-05	8.04311e-05	0	5.83431e-05	0	0	8.50702e-05	5.66476e-05	0	7.85978e-05	0	0.000588254	8.65551e-05	0.000167785	0.000113808	0.000171233	0.000125384	6.07165e-05	8.017e-05	0.00017389	0.000127515	0.000130619	0	9.42418e-05	0	0.000408723	5.67006e-05
Otu0185	Unclassified Sphingomonadaceae	0	0	0	0	0	0	0	0	0	9.78697e-05	0.000115068	0.000117429	3.027e-05	4.30274e-05	5.06997e-05	0.000324811	0	9.68085e-05	0	0	2.77917e-05	0	8.04311e-05	0	0	0	0	0	0	0	0	0	0	0	0	0	0	0	0	0	0	0	0	0	0	0	0	0
Otu0186	Unclassified Proteobacteria	0.00126839	0.00107591	0.000235724	0.000463147	0.00123512	0.00104839	0.0018851	0.00143842	4.74383e-05	0	0	0	0	0	5.06997e-05	9.28031e-05	0.00011627	0	0	0.00028177	0	4.11032e-05	0	3.97931e-05	0	0	5.8782e-05	0.000113427	0	3.82687e-05	0	0	0	0.00017311	6.71141e-05	8.53558e-05	6.84932e-05	0	0	0.00016034	1.93211e-05	7.65091e-05	0.000130619	0	0	0	0	0
Otu0187	Bdellovibrio	0	5.97729e-05	0.000176793	0	0	0.000551785	0	5.99341e-05	9.48767e-05	6.52465e-05	5.75341e-05	0	0	0.000688439	0.000152099	4.64016e-05	3.87567e-05	0.000193617	0.000223983	0.000128077	0.00016675	4.11032e-05	0	0.000159172	0	0	5.8782e-05	0.000113427	0	0	0	0	0.000185764	0	0	0	0	0	0	0	0	0	0	0	0	0	0	0
Otu0188	Unclassified Xanthomonadaceae	0.000761035	0.000896593	0.00058931	0.000793966	0.0028071	0.000772499	0.000807899	0.000449506	0.00170778	0.000260986	0.000143835	5.87147e-05	3.027e-05	0.00017211	0.000152099	0.000185606	0.00023254	0.000613121	8.39936e-05	0.000307385	8.3375e-05	8.22064e-05	0.000201078	0.000318345	0	0	8.81731e-05	8.50702e-05	0	7.65374e-05	0.000157196	0	0	0	3.3557e-05	0.00014226	3.42466e-05	0	0	0.00024051	5.79632e-05	0.000102012	0.000152389	0	0.000188484	0	5.8389e-05	0
Otu0189	Unclassified Planctomycetaceae	0.00101471	0.00041841	0.000707172	0.000198491	0.000449135	0.00115875	0.000448833	0.000629308	0.000332068	0	0	2.93574e-05	0	4.30274e-05	5.06997e-05	0.000185606	0	3.22695e-05	0	0	5.55833e-05	0.000287722	0	0.000238758	0	0	0.000117564	0	0	0.000153075	0	0	0	0.000201962	0.000234899	0.000312971	0.000445205	0.00015673	0.000182149	0.00024051	0.000115926	0.000153018	0.000217699	0	9.42418e-05	0	0	0
Otu0190	Unclassified Sphingobacteriales	0	5.97729e-05	0	6.61638e-05	0	5.51785e-05	0	0.000269703	0.000189753	0	0	5.87147e-05	0.00048432	0	0.000101399	0.000139205	0	0	0.00335974	0	0.000138958	4.11032e-05	0	0	0	0	0	8.50702e-05	0	0	0	0	0	2.88517e-05	0	2.84519e-05	0	0	0	0	1.93211e-05	0	2.17699e-05	0	0	0	0	0
Otu0191	Methylobacterium	0.00177575	0.00263001	0.00194472	0.00185259	0.00213339	0.00137946	0.0016158	0.000599341	0.00289374	0	5.75341e-05	0	0	0	0	0	0	0	0	0	0	0	0	7.95862e-05	0	3.13322e-05	0	5.67135e-05	0	0	0	0	0	0	0	0	6.84932e-05	0	0	0.000440935	0	0	0	0	0	0.000140682	0	0
Otu0192	Unclassified Comamonadaceae	0.000930154	5.97729e-05	0	0	0	0	0	0	0.000237192	3.26232e-05	0	0	0	0	0.000101399	0	0	0	0	0	5.55833e-05	0	0	0	0	0.00112796	5.8782e-05	0	0	0	0.000235793	0.000118224	0	2.88517e-05	0	0	3.42466e-05	3.1346e-05	0	0	0	2.5503e-05	6.53097e-05	0	0	0	0	0
Otu0193	Unclassified Betaproteobacteria	0	0	0	0	0	0	0	0	0	0	0	0	0	0	0	4.64016e-05	0	0	0	0	8.3375e-05	0	0	0	0	0	5.8782e-05	0	0	0	0	0	0	0	0	0	0.000171233	9.4038e-05	0	0	0	0	6.53097e-05	0	0	0	0	0
Otu0194	Gemmatimonas	0.000507357	0	0.000530379	0	0	0	0	0.000359604	0	3.26232e-05	0	0.000117429	3.027e-05	0	0.000304198	0	0	6.4539e-05	0	0.000128077	8.3375e-05	8.22064e-05	0.000281509	0	0	0	0	0	0	0	0.000117897	0	0	0	0	0	0	0	3.03582e-05	0	0	0	0	0	0	0	0	0
Otu0195	Unclassified Bacteria	0	0.000119546	0.000117862	0	0	0.000220714	0	0.000149835	0.000332068	0.000489349	0.00103561	0.00132108	0.00072648	0.000688439	0.000608396	0.000742425	0.000310053	0.00235567	0.00232382	0.00286893	0.00219554	0.00139751	0.0028553	0.00139276	0.000408401	0	0.000146955	0	0.000113295	0.00202824	0.000668081	0	0.00269358	0.000461627	0.000302013	0.000227615	6.84932e-05	0	6.07165e-05	0.000280595	0.00017389	2.5503e-05	0.000152389	0	4.71209e-05	0	0	0
Otu0196	Unclassified Proteobacteria	0.000676476	0	0.000648241	0	0.000112284	0	8.97666e-05	0.000179802	4.74383e-05	0.000130493	0.000172602	8.80721e-05	0.00048432	0.00017211	5.06997e-05	0.000139205	7.75134e-05	3.22695e-05	0.000643951	0	0	0	0	0.000198965	2.91715e-05	0	0.000117564	0.000340281	0	0.000191344	0	0	0	0	0	0	0	0	0	0	0	0	0	0	0	0	0	0
Otu0197	Gp6	0	0	5.8931e-05	0	0	0	0.0005386	0.000179802	0	6.52465e-05	0	0	0	0	0	4.64016e-05	3.87567e-05	0.000129078	0	0	2.77917e-05	0.000164413	0	0.000119379	0	0	0	0.00017014	0	0	3.92989e-05	0	0	5.77034e-05	0	0	0	0	3.03582e-05	4.0085e-05	0	5.10061e-05	0	0	4.71209e-05	0	0	0
Otu0198	Bosea	0	0	0	0	0	0	0	0	0	0	0	0	0	0	0	0.00060322	0.00011627	0	0	0	2.77917e-05	0	0	0	0	0	0	0	0	0	0	0	0	0	0.000134228	0.000113808	0	6.2692e-05	0	0	0	0	0	0	4.71209e-05	0	8.75836e-05	0
Otu0199	Desulfosporosinus	0	0.000119546	0.000648241	0.000132328	0	0.000275893	0.000179533	2.9967e-05	4.74383e-05	0	0	8.80721e-05	0	0	0.000202799	4.64016e-05	0	0	0	0	2.77917e-05	0	0	0.000119379	0	0.000657977	0	0	0	0	0	0	0	0	0	0	0	0	0	0	0	0	2.17699e-05	0	0	0	0	0
Otu0200	Bdellovibrio	0.00109927	0	0.00111969	0.000330819	0.000112284	0	8.97666e-05	0.000479473	0.00085389	0.000554595	0.000172602	0.000440361	0.00048432	8.60548e-05	0.000304198	0.000232008	0.00011627	6.4539e-05	0	0.000870924	0.000222333	0.000205516	4.02156e-05	7.95862e-05	0	0	8.81731e-05	0.000737275	8.49714e-05	0.000267881	0	0	3.09607e-05	0	0	0	0	0	0	0	0	0	0	0	0	0	0	0
Otu0201	Gp4	0	0.000179319	0.00159114	0.000793966	0	0.000220714	0.000807899	0.000958945	0.000379507	0.000228363	8.63011e-05	0.000234859	0.00045405	0	0.000304198	0.000139205	0.000193783	6.4539e-05	0	0	5.55833e-05	0.000452135	0.00036194	0.000318345	0.000175029	0	0	0.000226854	0.000368209	0	7.85978e-05	0	0	0.00017311	3.3557e-05	0.000113808	0	0	0	0	0	0	0	0	0	0	0	0
Otu0202	Pseudomonas	0	5.97729e-05	0.000176793	0	0	0	0.000179533	0	0	0.000358856	5.75341e-05	0.000146787	0.00027243	0.000473301	0	0	3.87567e-05	3.22695e-05	0.0025758	0.00102462	0	0	0.000241293	0	0.00037923	0.00222459	0.000264519	0	0.000509828	3.82687e-05	0.000235793	0.00236449	0.000123843	0	0	0	0	0	0	0	0	0	0	0.00138807	4.71209e-05	0.00225091	0.000204362	0.00107731
Otu0203	Stenotrophomonas	0	0	0	0	0	0	0	0	0	0.00212051	0.00437259	0.00422746	0.00481293	0.00202229	0.00212939	0.00222727	0.00220913	0	0	0	0	0	0	0	0	0	0	0	0	0	0	0	0	0.000115407	0	0	0.00010274	6.2692e-05	6.07165e-05	0	5.79632e-05	0	0	0	4.71209e-05	0	0	0
Otu0204	Unclassified Alphaproteobacteria	0.000253678	0.000358637	0	0	0	5.51785e-05	0.000448833	0	0	0	0	0.000146787	0	0	0.000202799	9.28031e-05	0.000155027	0	0	0	2.77917e-05	0	4.02156e-05	7.95862e-05	2.91715e-05	0	0	0	0	3.82687e-05	0	0.000295561	0	5.77034e-05	6.71141e-05	2.84519e-05	0	3.1346e-05	6.07165e-05	0	0	0	4.35398e-05	0	0	0	0.000379529	0
Otu0205	Burkholderia	0	0	0	0	0	0	0	0	4.74383e-05	6.52465e-05	0	0.000146787	0	0	0	0	3.87567e-05	0	0.000139989	5.12308e-05	0	0.00012331	4.02156e-05	0	0	0	0.000146955	0	0	0.000229612	0	0	0	0	0	0	0	0	0	0	0	0	0	0	0	0	0	0
Otu0206	Unclassified Proteobacteria	0	0	0.000117862	6.61638e-05	0.00112284	0.000220714	0.000359066	2.9967e-05	0	0	0.00028767	5.87147e-05	0	0	0.000101399	0	0	0	0	7.68462e-05	0	0	0	0.000119379	0	0	0	0	5.66476e-05	0	0	0	0	0	3.3557e-05	0	0	0	6.07165e-05	0	0	5.10061e-05	0	0	0	0.00109028	0	0
Otu0207	Unclassified Planctomycetaceae	0.00143751	0.000298864	5.8931e-05	0	0	0.000165536	0.000179533	0.000389571	0.000189753	0	0.00048904	0	0	0	0.000354898	0.000324811	0.000271297	0	0	0	0.000277917	0.000328826	0.000321724	0.000397931	0.00166278	0	0.00114625	0.000538778	0.000481505	0.0030615	0.00125757	0	0	0.00017311	0.000369128	0.00014226	0.000513699	0.000188076	0.000212508	0.000200425	1.93211e-05	0.000102012	0.000108849	0	0	0	0	0
Otu0208	Unclassified Betaproteobacteria	0.000930154	0.00239091	0.00194472	0.00105862	0.00190883	0.00176571	0.0016158	0.00113875	0.00256167	9.78697e-05	0.000316437	0.000411003	0.00024216	0.00116174	0.000506997	0.000324811	0.000310053	0.000548582	0	0.000153692	0.000250125	0.000164413	0.000201078	0.000119379	0.000495916	0.000250658	0.000146955	0.000340281	0.00022659	3.82687e-05	7.85978e-05	0	0	5.77034e-05	0.000167785	0.00014226	0.000136986	0	3.03582e-05	4.0085e-05	1.93211e-05	0	8.70796e-05	0	4.71209e-05	0	0.000408723	0
Otu0209	Gp3	0.0035515	0.00143455	0.00265189	0.00112478	0.00123512	0.00160018	0.00143627	0.00161822	0.00194497	6.52465e-05	0.000230136	0.000176144	0.00084756	0.000903576	0.000101399	0.000464016	0.00023254	3.22695e-05	0.000251981	0.000179308	0.000250125	8.22064e-05	0.000321724	7.95862e-05	0.000233372	0	0.00138138	8.50702e-05	0.000509828	0.000267881	0.000392989	2.95561e-05	0	2.88517e-05	0	5.69039e-05	0	0	0	0	1.93211e-05	0	4.35398e-05	0	0	0	0	0
Otu0210	Unclassified Rhodospirillales	8.45594e-05	0.000119546	0.000294655	6.61638e-05	0.000224568	0.000220714	0	5.99341e-05	0	0	0	5.87147e-05	0	0	0	0.000185606	3.87567e-05	0	0	0	2.77917e-05	0	0	0	0	3.13322e-05	0	0	0	0	7.85978e-05	0	0	2.88517e-05	0	5.69039e-05	3.42466e-05	0	0	0	1.93211e-05	0	0	0	0	0	0	0
Otu0211	Unclassified Bacteria	0	0	0.000235724	0	0	5.51785e-05	8.97666e-05	0.000179802	0.000142315	0.000260986	8.63011e-05	8.80721e-05	0	0	0	9.28031e-05	0.000310053	9.68085e-05	0	2.56154e-05	0	0.00012331	0	0	0	0	0	2.83567e-05	0	0	0	0.000591121	0	2.88517e-05	0.000167785	2.84519e-05	0	0	0	0.000120255	0	0	0.000152389	0	0	0	0	0
Otu0212	Magnetospirillum	0	0	0	0	0.000112284	0.000110357	0	2.9967e-05	0	0	0.000460273	0.000146787	0.00045405	0.000430274	0.000101399	9.28031e-05	0.00034881	0.000193617	2.79979e-05	5.12308e-05	5.55833e-05	0.000164413	8.04311e-05	0.000198965	0	0	5.8782e-05	2.83567e-05	0	7.65374e-05	0.000157196	0	0	0	0	0	6.84932e-05	9.4038e-05	0	0	0	0	0	0	0	0	0	0
Otu0213	Akkermansia	8.45594e-05	0	0.000176793	6.61638e-05	0.000112284	0	0.00278276	0	9.48767e-05	0	0	0	0	0	0	0	0	3.22695e-05	2.79979e-05	0.000102462	0	0	4.02156e-05	0	0	6.26645e-05	5.8782e-05	0.00017014	0	0	0	0	0	0.000115407	0.000134228	0	6.84932e-05	0	6.07165e-05	0	9.66053e-05	2.5503e-05	2.17699e-05	0	0	0	0	0
Otu0214	Prosthecobacter	0.000422797	5.97729e-05	0	0	0	0	0	8.99011e-05	0.000948767	0	0	0	0	0	0	9.28031e-05	7.75134e-05	0.000161348	0	0	8.3375e-05	0.00012331	0.000442371	0.000477517	0.00148775	0	0	2.83567e-05	0	0.000114806	7.85978e-05	0	0	0	0	0	3.42466e-05	0	0	0	1.93211e-05	0	4.35398e-05	0	0	0	0	0
Otu0215	Roseburia	0	0	0	0	0	5.51785e-05	0.0013465	0	0	0	0	0	3.027e-05	0	0	0	0	0	0	0	0	0	0	0	0	0	0	0	0	0	0	0	0	0	0	0	0	0	3.03582e-05	4.0085e-05	3.86421e-05	0	0	0	0	0	0	0
Otu0216	Unclassified Gammaproteobacteria	0.000169119	0.000777047	0.00058931	0.000132328	0.000561419	0.000496607	0.000628366	0.000899011	0.000426945	9.78697e-05	0	5.87147e-05	0.00012108	0.000215137	0.000253498	4.64016e-05	3.87567e-05	0	0.00039197	0	0.000111167	8.22064e-05	0	0.000278552	5.83431e-05	0	0.000176346	5.67135e-05	0.000368209	3.82687e-05	7.85978e-05	0	0	0.000490479	0.000469799	0.000483683	0.000787671	0.000125384	0.000121433	0.00040085	0.000115926	0.000306037	0.000478938	0	0.000282725	0	0.000729863	0
Otu0217	Unclassified Bacteria	0.00126839	0.000298864	0.000117862	0.000198491	0.00112284	0.000110357	0.000718133	0.000479473	4.74383e-05	0	0	5.87147e-05	6.054e-05	0.000215137	5.06997e-05	0	0	0	0	0	0	4.11032e-05	0	0.000318345	0	0	0.000264519	2.83567e-05	0	0	3.92989e-05	0	0	0	0	0	0	0	0	0	1.93211e-05	5.10061e-05	4.35398e-05	0	0	0	0	0
Otu0218	Bacteroides	0	0.000119546	0	0	0	0	0.00170557	0	0	0	0	0	0	0	0	0	0	3.22695e-05	0	0	0	0	0	0	0	0	0	0	0	0	0	0	0	0	0	0	6.84932e-05	0	0	0	0	0	2.17699e-05	0	0	0	0	0
Otu0219	Bdellovibrio	0.00194487	0.000298864	0.00129648	0	0.000898271	0.000331071	0	0.000389571	0.000664137	0.000554595	0.000143835	8.80721e-05	9.081e-05	0.000129082	0.000557696	0.000788827	0.00023254	0	0.000615953	0.000589154	0.000222333	4.11032e-05	0.000120647	7.95862e-05	5.83431e-05	0	0.00085234	0.000113427	0.000339886	0.000382687	3.92989e-05	0	0	0	0	0	0	0	0	0	0	0	0	0	0	0	0	0
Otu0220	Lewinella	0.000507357	0.000597729	0.00306441	0.00125711	0.00303166	0.000220714	0.00152603	0.00122865	0.000711575	0.000228363	0.000431506	0.000822006	0.00187674	0.000129082	0.000101399	0.00060322	0.000736377	9.68085e-05	0.000111991	0	0.000277917	0.000164413	8.04311e-05	0.000238758	0.000466744	0.00601579	8.81731e-05	5.67135e-05	0	0.000267881	0.000589484	0.00399007	0	0	0	0	0	0	0	0	0	0	0	0	0	0	0	0
Otu0221	Unclassified Bacteria	0	0.000119546	0.000353586	0	0.000112284	0.000275893	0	0.00029967	0	0	0	5.87147e-05	0	0	0	0	0	6.4539e-05	0	0	0	4.11032e-05	0	0	0	0.00181727	0	0.000113427	0	7.65374e-05	0.000117897	0	0	8.65551e-05	0.000100671	0	0.000136986	3.1346e-05	3.03582e-05	0.00032068	7.72842e-05	5.10061e-05	0.000261239	0	0	0	0	0
Otu0222	Unclassified Bacteria	0	0	0	0	0	0	0	2.9967e-05	0.000142315	3.26232e-05	2.8767e-05	0	0	0	5.06997e-05	4.64016e-05	3.87567e-05	0	0	5.12308e-05	0	0	0	0	0	0	0	8.50702e-05	0	0	0	0	0	0	0	0	0	0	0	0	0	0	0	0	0	0	0	0
Otu0223	Unclassified Betaproteobacteria	0	0.000239091	0	6.61638e-05	0	0	0.000359066	2.9967e-05	0	0	0	0.000176144	0	0	0	0	0	0	0	0	5.55833e-05	0	0.000120647	0	0	0	0	0	0	0.000153075	0	0	0.000712096	0	0	0	0	0	0	0	0	0	0	0	0	0	0	0
Otu0224	Unclassified Bacteria	0	0	0	0	0	0	0	0	0	0	0	0	0	0.00017211	0	9.28031e-05	7.75134e-05	0.000225887	2.79979e-05	0	2.77917e-05	8.22064e-05	0.000281509	0	2.91715e-05	0	0	0	0	0	0	0	0	0	0	0	0	0	0	0	0	0	0	0	0	0	0	0
Otu0225	Unclassified Gammaproteobacteria	0	0.000119546	0.000353586	0	0	0.000110357	0	5.99341e-05	0	0	0.000143835	0	3.027e-05	0	0.000101399	4.64016e-05	0	0.000161348	0	0	8.3375e-05	0	0	0	0	0	8.81731e-05	0	0	0	0	0	0	0	0	0	0	0	0	0	0	0	0	0	0	0	0	0
Otu0226	Unclassified Proteobacteria	0.00177575	0.000239091	0.000766103	0	0	0.000220714	0.0002693	8.99011e-05	0	0	5.75341e-05	5.87147e-05	0.00033297	0.000301192	5.06997e-05	0.000232008	7.75134e-05	0	0	0	5.55833e-05	0	0.000201078	0	0	0	2.9391e-05	0	5.66476e-05	7.65374e-05	0.000196495	0	0	0	0	0	0	0	0	0	0	0	0	0	0	0	0	0
Otu0227	Unclassified Gammaproteobacteria	0	5.97729e-05	0	0	0	5.51785e-05	0	5.99341e-05	0.000237192	0	0	0	0	0	0	0	0	9.68085e-05	0	0	0	0	0	0	0	0	0	0	0	0	0	0	0	0	0	2.84519e-05	3.42466e-05	6.2692e-05	6.07165e-05	4.0085e-05	1.93211e-05	0.000102012	6.53097e-05	0	0	0.00137165	0	0
Otu0228	Unclassified Rhizobiales	0.000591916	0	0.000412517	0.000396983	0.000673703	0	0.000179533	2.9967e-05	0.000616698	0	0	5.87147e-05	0	0	0	0	0	0	0	0	0	0	0	0	0	0	5.8782e-05	0	0	0	0	0	0	0	0.000234899	0	3.42466e-05	0	0	0	0	0	4.35398e-05	0	0	0	0	0
Otu0229	Unclassified Bacteria	0	0	0.000235724	0	0	0	0.000179533	0	0	9.78697e-05	0	0	6.054e-05	0	0	0	3.87567e-05	0	5.59957e-05	0	0	0	0	0	0	0	0	0	0	0	3.92989e-05	0	0	0	0	0	0	0	0	0	0	0	0	0	0	0	0	0
Otu0230	Unclassified Alphaproteobacteria	0.000422797	0.000298864	0.000648241	0.000132328	0.00123512	0.000496607	0.000628366	0.000359604	0.000616698	0	2.8767e-05	8.80721e-05	0	0	0	9.28031e-05	0	0.000161348	5.59957e-05	0	2.77917e-05	8.22064e-05	0.000321724	3.97931e-05	2.91715e-05	0.000626645	0.000176346	0	0	0	0.000196495	0	0	5.77034e-05	0	0.00014226	0.000136986	0	0	0	3.86421e-05	0	8.70796e-05	0	0	0	0	0
Otu0231	Unclassified Parachlamydiaceae	0.000338238	0.000119546	0.000235724	0.000132328	0.000224568	0.000165536	8.97666e-05	2.9967e-05	0.000189753	0	0	0	0	0	0	9.28031e-05	7.75134e-05	6.4539e-05	0	0	0.000111167	0.000411032	0	3.97931e-05	2.91715e-05	0	0	0	5.66476e-05	0	0	2.95561e-05	0	0	0	5.69039e-05	3.42466e-05	0	0	0	0	0	0	0	0	0	0	0
Otu0232	Shinella	0	0	0	0.000132328	0	5.51785e-05	0	0	0.000142315	0.000946074	0.00126575	0.000910078	0.00063567	0.000258164	0.000152099	0.000185606	0.00023254	0	0	0	0	0	0	0	0	0	0	0	0	7.65374e-05	0	0	0	0.00017311	0	0	3.42466e-05	0.000125384	0.000121433	0	0	2.5503e-05	0	0	0	0	0	0
Otu0233	Bdellovibrio	0	0.000179319	0.00153221	0.000529311	0	0	0.000359066	0	0.00056926	0.000130493	2.8767e-05	0.000381646	6.054e-05	0	0.000202799	0.000139205	0.000193783	0.000129078	0	0	0.000111167	0.000164413	0	0	0	0	0	0	0	0	0	0	0	0	0	0	0	0	0	0	0	0	0	0	0	0	0	0
Otu0234	Bdellovibrio	0.00228311	0.000537956	0.00153221	0.00105862	0.00101055	0.000772499	0.000718133	0.000988912	0.00379507	0.000326232	0.00120822	0.00108622	0.00142269	0.000430274	0.000253498	0.000649622	0.00034881	0.000387234	0.000223983	0.000717231	0.000361292	8.22064e-05	0.000402156	0.000477517	0.0012252	0	5.8782e-05	0.000311924	8.49714e-05	0.00114806	0.000275092	0.000532009	0	0	0	0	0	0	0	0	0	0	0	0	0	0	0	0
Otu0235	Bdellovibrio	0	0.000239091	0.00147327	0	0	5.51785e-05	0.000628366	8.99011e-05	4.74383e-05	0.000130493	0	2.93574e-05	0.00066594	0	0	0.000371212	0.000193783	3.22695e-05	0	0	5.55833e-05	0.00012331	0.000201078	0.000238758	0	0	0.000411474	0	0.000141619	0.000267881	0	0	0	0	0	0	0	0	0	0	0	0	0	0	0	0	0	0
Otu0236	Unclassified Proteobacteria	0.000507357	0.000358637	0.000766103	0.000529311	0.000673703	0.000551785	0.000359066	0.000449506	0.000521822	0.000195739	0.000143835	0.000117429	0.00039351	0	0.000253498	0	0.00011627	9.68085e-05	0	0.000307385	5.55833e-05	8.22064e-05	0.000241293	0.000358138	0.000320887	0	2.9391e-05	0.000482064	0.000198267	0.000382687	0.000825277	0.000591121	0.000402489	0.000115407	6.71141e-05	8.53558e-05	0	3.1346e-05	0	4.0085e-05	0	0.000127515	2.17699e-05	0	0.000141363	0	0	0
Otu0237	Unclassified Planctomycetaceae	0	0	0.000176793	0	0	0	0	5.99341e-05	0	0	0	0	0	0	0	0	3.87567e-05	0	0	0	0	0.00012331	0	3.97931e-05	0	0	0	0	0.000566476	0.000229612	0	0	0	0	6.71141e-05	0	0	6.2692e-05	0	8.017e-05	3.86421e-05	0	6.53097e-05	0	0.000141363	0	0	0
Otu0238	Unclassified Bacteria	0	0	0.000117862	0	0	0	0	8.99011e-05	9.48767e-05	0	0.000172602	0.000117429	3.027e-05	0	5.06997e-05	0	7.75134e-05	0	0	0	0	8.22064e-05	4.02156e-05	0	0	0	0	0	0	0	7.85978e-05	0	0	0	0	0	0	0	0	0	0	0	0	0	0	0	0	0
Otu0239	Unclassified Bacteroidetes	0.00346694	0.001315	0.00288762	0.000793966	0.00134741	0.000441428	0.00152603	0.00104885	0.00180266	0.000424102	0.00149589	0.0013798	0.00236106	0.00189321	0.000861894	0.000742425	0.000658864	0.000225887	0	0.00061477	0.000305708	0.000575445	8.04311e-05	0.000358138	0	0.000469984	0.00111686	0.000340281	0.000793066	3.82687e-05	0.000550185	0.000886682	0.00043345	0	0	0	0	0	0	8.017e-05	0	0	0	0	0	0	0	0
Otu0240	Planctomyces	0	0	0.000353586	0	0	0	0	0.000839077	0.000237192	0	0.00126575	0.00099815	0.00072648	0	0.00121679	0.00060322	0.00108519	0.00109716	0.000559957	0.00028177	0.000305708	0.00147972	0.00132711	0.000756068	0.000525088	0	0	0.00153126	0.0005948	0.000267881	7.85978e-05	0	0.000154804	0.000144259	0.000100671	0	6.84932e-05	9.4038e-05	0.000151791	4.0085e-05	5.79632e-05	0.000204024	0.000152389	0	0	0	0.00116778	0
Otu0241	Bosea	0	0	0	0	0	0	0	0	0	0	0	0	0	0	0	0	0	0	2.79979e-05	0	0.000111167	0	0	0	2.91715e-05	0	8.81731e-05	0	0	0	0	0	0	0	0.000134228	0	0	0	0	8.017e-05	5.79632e-05	0	0	0	0	0	0.000145973	0
Otu0242	Bdellovibrio	0	0	0	0	0	0	0	0	0	0	2.8767e-05	0	0	0	0	4.64016e-05	0.000155027	0	0	0	2.77917e-05	0	0	3.97931e-05	0	0	5.8782e-05	0	0	0	3.92989e-05	0	0	0	0	0	0	0	0	0	0	0	0	0	0	0	0	0
Otu0243	Unclassified Chitinophagaceae	0	0	0	0.000264655	0	0.000275893	0.000179533	0.00104885	9.48767e-05	0	0.000115068	0	0	0	0	0	3.87567e-05	0.000129078	0	0	5.55833e-05	4.11032e-05	0	0.000159172	0	0	0	0	0	3.82687e-05	0	0	0	0	0	0	0	0	0	0	0	0	0	0	0	0	0	0
Otu0244	Gp4	0.000761035	0.00041841	0.00165007	0.000661638	0	5.51785e-05	0.000448833	0.00134852	0.000237192	6.52465e-05	0.000373972	0.000146787	0.00021189	0.000430274	0.000202799	0.000324811	3.87567e-05	0.000193617	0.000335974	0.000435462	0.000138958	0.000328826	0.000120647	7.95862e-05	2.91715e-05	0	0	0.000198497	0	0.000420956	0.000117897	0	0	0	0	0	0	0	0	0	0	0	0	0	0	0	0	0
Otu0245	Unclassified Deltaproteobacteria	0	0.00041841	0.000412517	6.61638e-05	0	0.000441428	0.000359066	0.000179802	0.000664137	0.000391479	0	8.80721e-05	0	0	0	0.000417614	0.00011627	0	0	0	0.000138958	8.22064e-05	0.000281509	0.000159172	0.000262544	0	0	0	8.49714e-05	0.00126287	0.000117897	0	0	0	0	0	0	0	0	0	0	0	0	0	0	0	0	0
Otu0246	Unclassified Bacteria	0.00219855	0.00113568	0.00188579	0	0.000561419	0.000275893	0.000448833	0.000419539	0.00137571	0.000228363	0.000316437	0.000205502	0.00018162	0	0	0.000232008	0.00011627	0	0	0.000204923	0.000305708	0.00012331	0.000482587	0.000159172	0	0	2.9391e-05	0.000311924	2.83238e-05	0.000229612	0.000157196	0	0.000402489	2.88517e-05	6.71141e-05	0	0	0	0	0	0	5.10061e-05	8.70796e-05	0	0	0	0	0
Otu0247	Unclassified Sphingomonadaceae	0	0	0	0	0	0	0	0	0	6.52465e-05	0	0	3.027e-05	0	0.000152099	9.28031e-05	0	0	0	0	2.77917e-05	4.11032e-05	0	0	2.91715e-05	0	0	0	0	0	0	0	0	0	0	0	0.00010274	0	0	0	0	0	0	0	0	0	0	0
Otu0248	Unclassified Sphingomonadaceae	0	0	0	0	0	0	0	0	0	0	0	5.87147e-05	3.027e-05	0	0.000152099	0.000185606	0	0	0	0	2.77917e-05	0	0	0	0	0	0	0	0	0	0	0	0	5.77034e-05	0	0	0	0	6.07165e-05	0	0	0	0	0	0	0	0	0
Otu0249	Unclassified Cryomorphaceae	0	0	0.000353586	0.000264655	0	0.000275893	0.000448833	8.99011e-05	4.74383e-05	0	5.75341e-05	0	0.00012108	0	0	0.000139205	3.87567e-05	0.000225887	0	0	0.000138958	0	8.04311e-05	3.97931e-05	0	0	0.000411474	0	0	0	0	0	9.28821e-05	0	0	0	0	0	0	0	0	0	0	0	0	0	0	0
Otu0250	Unclassified Bacteria	0	0	0.000648241	0	0	0	8.97666e-05	0.000359604	0	0	8.63011e-05	0	3.027e-05	4.30274e-05	0	0	0.000155027	0	0	0	2.77917e-05	4.11032e-05	0.000201078	0	0	0.00028199	0	0	0	7.65374e-05	0	0	0	0	0	0	0	0	0	0	0	0	0	0	0	0	0	0
Otu0251	Unclassified Desulfobacterales	0	0.000777047	0.00135541	0.000198491	0	5.51785e-05	0	0.000569374	0	0	0	0	6.054e-05	0	0	0	0.00011627	0	0	5.12308e-05	0	4.11032e-05	8.04311e-05	0	0	0	0	0	5.66476e-05	0	0	0	0	0	6.71141e-05	0	0	0	9.10747e-05	0	7.72842e-05	0.000127515	0.000217699	0	9.42418e-05	0	0	0
Otu0252	Bdellovibrio	0.0054118	0.000657501	0.00406624	0.00172026	0.00247024	0.00110357	0.000718133	0.00176806	0.00237192	0.00150067	0.000834244	0.000675219	0.00075675	0.00159201	0.00172379	0.000742425	0.00186032	9.68085e-05	0	0.000999001	0.000305708	0.000493239	0.000402156	0.000397931	0.000904317	0.000125329	0.000470256	0.000680561	0.000481505	0.00130114	0.00153266	0.00067979	0	0	0	0	0	0	0	0	0	0	0	0	0	0	0	0
Otu0253	Unclassified Proteobacteria	0	0.000597729	0.000942896	0.000727802	0.000785987	0	0.000359066	0.000359604	0.0012334	0.000228363	0.000834244	0.00055779	0.00027243	8.60548e-05	0.000304198	0.000324811	0.000736377	0	0	5.12308e-05	0.000111167	0.00012331	0.000201078	0.000119379	0	0.000595313	0.000323301	0.000198497	0.000283238	0.000114806	0.000275092	0	0	0	0	0	0	0	0	0	0	0	0	0	0	0	0	0
Otu0254	Unclassified Enterobacteriaceae	8.45594e-05	0	0	0	0.000224568	0	0	0	0.000189753	0	8.63011e-05	2.93574e-05	0	0	0	0	0	3.22695e-05	0	0.00028177	0.000138958	0	4.02156e-05	0	0	0.000125329	0	0	0	0.000153075	0	0	0	2.88517e-05	0	0	0	0	0	4.0085e-05	0	0	2.17699e-05	0	0	0	0	0
Otu0255	Azospira	0.000338238	0.00041841	0.000235724	0.000396983	0	0.00038625	0.000179533	0.000179802	0.000142315	0.000163116	0	0	0	8.60548e-05	0	4.64016e-05	0	6.4539e-05	0.000251981	0	0	4.11032e-05	0	0	0	0	0	8.50702e-05	0.000141619	0	0.000392989	0	0	8.65551e-05	0	0	0	0	3.03582e-05	0	9.66053e-05	0	0	0	0	0	0	0
Otu0256	Terrimonas	0	0	0	0	0	0	0	0	0	0	0	0	0	0	0	0	0	0	0	0	0	0	0	0	0	3.13322e-05	0.00085234	0.000737275	0.00130289	0.00432437	0.00188635	0.00067979	0.000309607	0	0	0	3.42466e-05	0	0	0	0	0.000127515	0.000152389	0	0	0	0	0
Otu0257	Unclassified Bacteria	0.000845594	0	0.00153221	0	0.000224568	0.000441428	0.00116697	0.000449506	0.000616698	3.26232e-05	0.000345205	0	0.00021189	0	5.06997e-05	4.64016e-05	7.75134e-05	0.000129078	0	0	8.3375e-05	4.11032e-05	0	3.97931e-05	0.000291715	0.000908635	2.9391e-05	0	0.000141619	0.000382687	7.85978e-05	0	0	0	0	0	0	0	0	0	0	0	0	0	0	0	0	0
Otu0258	Unclassified Oxalobacteraceae	0	0	0	0.000396983	0.000673703	0	0	0	0.00028463	0	0	0	0	0	0	0	0	0	0	0	0	0	0	0	0	0	0	0	0	0	0	0	0	0	0	0	0	0	0	0	0	0	0	0	0	7.03408e-05	0	0.000340204
Otu0259	Unclassified Proteobacteria	0	0	0.00058931	0	0	0.000110357	8.97666e-05	0.000269703	0.000379507	0	0.000201369	8.80721e-05	0.0006054	0.00017211	0.000152099	9.28031e-05	0.000193783	0.000484043	0	0	0.0003335	0.000246619	0.000321724	0.000358138	0	0	2.9391e-05	0.000141784	0	0.000459225	0.000235793	0	0.000650175	0	0	0	0	0	0	0	0	0	0	0	0	0	0	0
Otu0260	Rhodobacter	0.000422797	0	0	0	0	0	0.000179533	0	0	0	2.8767e-05	0	0	0	0	0	0	0	0	0.000102462	0	4.11032e-05	0	0	0	0	0	0	2.83238e-05	3.82687e-05	3.92989e-05	0	0	0	0	0	0	0.000532882	0	0	0	0	0	0.000104105	0.000188484	0	0	0
Otu0261	Unclassified Bacteria	0.000507357	0.000119546	0.000235724	0.000264655	0.000224568	0.000662142	0.000448833	0.000389571	0	0.000130493	0	0.000205502	0.00012108	0	0.000152099	0	0.00011627	9.68085e-05	5.59957e-05	0	0	4.11032e-05	0	0	0	0	0	5.67135e-05	5.66476e-05	0	0	0	0.000340568	0	0	0	0	0	0	0	0	0	0	0	0	0	0	0
Otu0262	Unclassified Phyllobacteriaceae	0	0	0	0	0	0.000441428	0.00332136	0.000659275	0	0	0	0	0	0	0	0	0	0	0	0	0	0	0	0	0	0	0	0	0	0	0	2.95561e-05	0	0	0	0	0	0	0	0	0	0	0	0	0	0	0	0
Otu0263	Hydrotalea	0.00152207	0.00107591	0.000412517	0.000926294	0.00258253	0.00126911	0.0010772	0.00080911	0.0016129	0.00123968	0.000258903	0.000499075	6.054e-05	0.000301192	0.000760495	9.28031e-05	0.00023254	0.000258156	0.000699947	0.000896539	0.000472458	4.11032e-05	8.04311e-05	0.000437724	5.83431e-05	0	8.81731e-05	0.000283567	0.000368209	0.000841912	0.000314391	0.000620677	0	0.000230814	0.000167785	0.000284519	0.000684932	0	0.000364299	0.000360765	7.72842e-05	0.000153018	0.000631327	0	0	0.000105511	0	0.000113401
Otu0264	Unclassified Bacteroidetes	0.000338238	0.000239091	0.000412517	0	0	0.000110357	8.97666e-05	0.000149835	0	0	0.000172602	0.000176144	0.00054486	0	0.000202799	0.000232008	0.00093016	0	0	0	0.000222333	0.000493239	0.000160862	0.000437724	0	0	0	0.000425351	0.000283238	0	0	0	0	0	0	0	6.84932e-05	0	0	0	0	0	0	0	0	0	0	0
Otu0265	Unclassified Bacteroidetes	0.000761035	0.000179319	0	0.000132328	0.000112284	0.000165536	0	2.9967e-05	0	0	8.63011e-05	0	0	0	5.06997e-05	4.64016e-05	7.75134e-05	0	0	2.56154e-05	5.55833e-05	4.11032e-05	0	0	0	0	0	2.83567e-05	2.83238e-05	0.000191344	0	0	6.19214e-05	0	0	0	6.84932e-05	6.2692e-05	0	4.0085e-05	1.93211e-05	0	2.17699e-05	0	0	0	0	0
Otu0266	Unclassified Bacteria	0	0	0.00117862	0.000264655	0.000336852	0	0.000179533	8.99011e-05	9.48767e-05	9.78697e-05	0	8.80721e-05	0.00015135	0.000301192	0	0.000139205	0.00034881	0.000193617	0	0	8.3375e-05	0.00012331	0	3.97931e-05	0	0	0.000675993	0.000255211	0.000736419	0.000114806	0.00035369	0	0.000123843	0	0	0	0	0	0	0	0	0	0	0	0	0	0	0
Otu0267	Bdellovibrio	0	0	0	0	0	0	0	0	0	0	0	0	0	0	0	0	3.87567e-05	0	5.59957e-05	7.68462e-05	0	0	8.04311e-05	0	2.91715e-05	0	0	2.83567e-05	0	3.82687e-05	0	0	0	0	0	0	0	0	0	0	0	0	0	0	0	0	0	0
Otu0268	Unclassified Bacteroidetes	0	0.00185296	0.00141434	0.000595474	0.00168426	0.000551785	0.0002693	8.99011e-05	0.000664137	3.26232e-05	0.000949312	0.000733934	0.00142269	0.000215137	0.000557696	0.000464016	0.00155027	3.22695e-05	0	0.000128077	0.000250125	0.000287722	8.04311e-05	0.000198965	0	0.000908635	0.000558429	0	0	0.00130114	0.000471587	0	0.000402489	0	0	0	0	0	0	0	0	0	0	0	0	0	0	0
Otu0269	Unclassified Bacteria	0.000761035	0.000239091	5.8931e-05	0	0	0	0	8.99011e-05	0.00056926	0	8.63011e-05	0.000117429	0	0	5.06997e-05	4.64016e-05	0.00011627	3.22695e-05	0	0	0	0.000205516	0	3.97931e-05	0	0	0	0	0	0.000574031	0.000275092	0	0	5.77034e-05	0.000167785	5.69039e-05	0.00010274	0	3.03582e-05	8.017e-05	1.93211e-05	0.000102012	0.000108849	0	0	0	0	0
Otu0270	TM7_genus_incertae_sedis	0	0	0	0	0	0	0	5.99341e-05	0	0	0.000115068	0.000146787	0	0.00017211	5.06997e-05	0	0.000155027	0	0	7.68462e-05	5.55833e-05	0	0	0	0	0	0	0	2.83238e-05	0	0	0	0	0	0	0	0	0	0	0	0	0	0	0	0	0	0	0
Otu0271	OD1_genus_incertae_sedis	0.000338238	5.97729e-05	5.8931e-05	6.61638e-05	0.000561419	5.51785e-05	0	2.9967e-05	0	0	0	0	0	0	0	0	3.87567e-05	0.000322695	0	0	0	0	0	0	0	0	0	2.83567e-05	0	7.65374e-05	0	0	3.09607e-05	0	0	0	0	0	0	0	0	0	0	0	0	0	0	0
Otu0272	Gp4	0	0	0.000176793	0	0	0	0.0002693	0.000149835	0	0	0.00028767	0	3.027e-05	0	5.06997e-05	0	3.87567e-05	0.000193617	0	0	8.3375e-05	4.11032e-05	0	3.97931e-05	0	0	0	5.67135e-05	0.000198267	0	0.000471587	0	0	0	0	0	0	0	0	0	3.86421e-05	0	0	0	0	0	0	0
Otu0273	Unclassified Bacteria	0.00109927	0.000298864	0.000530379	0.000529311	0.000898271	0.000275893	0	5.99341e-05	0	0	0.000172602	0.000264216	0.00033297	0.00180715	0	0.000185606	0	0.000322695	0	0	0.000111167	0	0.000160862	0.000159172	0	0	0.000146955	5.67135e-05	0	0.000191344	3.92989e-05	0	0	0	0	0	0	0	0	0	0	0	0	0	0	0	0	0
Otu0274	Unclassified Gammaproteobacteria	8.45594e-05	0.000179319	5.8931e-05	0.000198491	0	0	8.97666e-05	0.000119868	0	0.000554595	0	5.87147e-05	6.054e-05	0	0	4.64016e-05	7.75134e-05	0	0	0.000204923	2.77917e-05	0	0	3.97931e-05	0	0	0	0	0.000113295	0	0	0	0	0	0	0	0	0	0	0	0	0	0	0	0	0	0	0
Otu0275	Rheinheimera	0	0.000358637	0.000825034	0.000463147	0.000561419	0.000165536	0.0005386	0.000479473	9.48767e-05	0	5.75341e-05	0	0	0.00017211	0.000101399	0	0	0.000322695	0	0.000179308	0	4.11032e-05	0	0	0	0	0	0	0	0.0006123	0	0	0	0	3.3557e-05	0	0	0	0	0	0	0	0	0	0	0	0	0
Otu0276	Unclassified Bacteria	0.000169119	0	0.000176793	0.000264655	0.000112284	0.000275893	0	5.99341e-05	0	0	2.8767e-05	0	0	0	0	0	0	0.000129078	0	0	0	0	0	0	0	0	0	0	0	0	3.92989e-05	0	0	2.88517e-05	0	0	0	0	0	4.0085e-05	0	0	6.53097e-05	0	0	0	0	0
Otu0277	Unclassified Alphaproteobacteria	0	0	0.000294655	0	0	0	0	0	0	0	0	0	0	0	0	9.28031e-05	0	0	0	0	2.77917e-05	0	0	0	0	0.000344655	0	0	0.000169943	0	0	0	0	0	0	0	6.84932e-05	0	0	0	0	0	0	0	0	0	0	0
Otu0278	Unclassified Betaproteobacteria	0.000169119	0.000119546	0.000117862	0	0	5.51785e-05	0.000179533	8.99011e-05	9.48767e-05	0	0	0	0	0	0	0	0	0	0	0.000153692	0	4.11032e-05	0	0	0	0	0	0	0	0	0	0	0	0	0	0	3.42466e-05	0	0	0.00016034	0	0	0	0	0	0	0	0
Otu0279	Opitutus	0	0	0.000117862	0.000132328	0	0	0	0	0	0	0	0	3.027e-05	0	0.000101399	0	0	3.22695e-05	0	0	5.55833e-05	0	0	0	0	0	0	0.000113427	0	0	0	0	0	0	0	0	0	0	0	0	0	0	0	0	0	0	0	0
Otu0280	Prevotella	0	0	0	0	0	0	8.97666e-05	0	0	0	0	0	0	0	0	0	0	0	0	0	0	0	0	0	0	0	0	0	0	0	0	0	0	2.88517e-05	0	0	3.42466e-05	0	0	0	0	7.65091e-05	0	0	0	0	0	0
Otu0281	Lactobacillus	0.000422797	0.00041841	0.000412517	0.000330819	0.000336852	0.00132428	0.00143627	0.000329637	0.000379507	0	0	5.87147e-05	0	0	0	0	0	0	2.79979e-05	0.000102462	2.77917e-05	0	0	0	2.91715e-05	0	0	0.000113427	0	0	0	0	0	0.00017311	0.000134228	0.00014226	0.00010274	6.2692e-05	6.07165e-05	8.017e-05	0.000637595	0.000204024	0.000849026	0	0	0	0	0
Otu0282	Unclassified Proteobacteria	0	5.97729e-05	0.000117862	6.61638e-05	0	0.000275893	0.000359066	0	0.000189753	0	0.000345205	0	3.027e-05	8.60548e-05	0.000202799	0.000139205	7.75134e-05	0	0	0	2.77917e-05	0	0	0	0	0	0	0	0	0.000153075	0	0	0	0	0.000100671	2.84519e-05	0	0	0	0	0	2.5503e-05	2.17699e-05	0	0	0	0	0
Otu0283	Unclassified Bacteria	0	0	0	0	0	0	0	0	0	0	0	0	0	0	0.000101399	4.64016e-05	0	0	2.79979e-05	0	0	4.11032e-05	0	0.000119379	0	0	0	0	0	0	3.92989e-05	0	0	0	0	0	0	0	0	0	0	0	0	0	0	0	0	0
Otu0284	Unclassified Burkholderiales	0	0	0	0	0	0	0	0	0	0	5.75341e-05	0	0	0	0	4.64016e-05	0.00011627	0	0	0	8.3375e-05	0	0	0	0	0	0	2.83567e-05	2.83238e-05	0	3.92989e-05	0	0	0	0	0	0	0	0	0	0	0	0	0	0	0	0	0
Otu0285	Unclassified Alphaproteobacteria	0	5.97729e-05	0.000353586	6.61638e-05	0.000336852	5.51785e-05	0	0	4.74383e-05	0	2.8767e-05	0.000117429	0	0.00017211	0.000202799	0	0	0	0	2.56154e-05	5.55833e-05	8.22064e-05	0	7.95862e-05	0	0	0	2.83567e-05	0	0	0	0	0	0	0	0	0	0	0	0	0	0	0	0	0	0	0	0
Otu0286	Unclassified Bacteria	0	0.00107591	0.000412517	0	0	5.51785e-05	0.000179533	0.000119868	0	0	0	0.000234859	6.054e-05	0	0	0.000232008	0.00011627	6.4539e-05	0	0	2.77917e-05	0.000164413	0.000120647	0.000358138	0	0	0.00126381	0	0.000254914	0.0006123	0.000471587	8.86682e-05	0	0	0	0	0	0	0	0	0	2.5503e-05	4.35398e-05	0	0	0	0	0
Otu0287	Gp6	0	0	0.000176793	0.000132328	0	0	0	0.000419539	0	0	0	0.000146787	0	0	0	0.000139205	0	0	0	0	0	0	0	0	0	0	0	0.000198497	0	0	0.00035369	0	0	0	0	0	0	0	0	0	1.93211e-05	0	0	0	0	0	0	0
Otu0288	Streptococcus	8.45594e-05	0	0	0.000198491	0.000112284	0	0.000448833	0	9.48767e-05	0	0	0	0	0	0	0	0	0	0	0	0	0	0	0	0	9.39967e-05	0	0	0	0	0	0	0	2.88517e-05	0	0	3.42466e-05	0	0	0	0	0	4.35398e-05	0	0	0	0	0
Otu0289	Hyphomonas	0.000338238	0.000119546	5.8931e-05	0	0.000449135	0.000110357	0	0.000269703	0.000426945	0.000391479	0	2.93574e-05	0.00063567	0	0.000101399	0	0	0	0	0	0	4.11032e-05	8.04311e-05	0.000159172	0	0	0	5.67135e-05	0.00022659	7.65374e-05	7.85978e-05	0	0	0	0	0	0.00010274	0	0	0	0	0.000102012	0.000152389	0	0	0	0	0
Otu0290	Unclassified Deltaproteobacteria	0	0.000179319	0.00117862	0	0	0	0.000628366	0.000419539	0	0	0	0	0	0	0	0	3.87567e-05	6.4539e-05	0	2.56154e-05	5.55833e-05	0	0	0	0	0	0	5.67135e-05	0	0.000191344	3.92989e-05	0	0	0	0	0	0	0	0	0	0	0	0	0	0	0	0	0
Otu0291	Unclassified Proteobacteria	0.00287502	0.00101614	0.00606989	0.00125711	0.00202111	0.000331071	0.0010772	0.00185796	0.00246679	0.000848204	0.000920545	0.00108622	0.00045405	0.000645411	0.000811194	0.00060322	0.000620107	0.00064539	0.000671949	7.68462e-05	0.000305708	0.000164413	0.000402156	0.000477517	0.000904317	0	0.00102869	0.00017014	0.0010763	0.000994987	0.000392989	0.000295561	0	0	0	0	0	0	0	0	0	0	0	0	0	0	0	0
Otu0292	Unclassified Rhizobiales	8.45594e-05	0	0.000883965	0.000198491	0.00213339	0.000717321	0.0005386	0.000389571	0.00113852	0	5.75341e-05	0	0	0	0	0	0	0	0	0	5.55833e-05	0	0	3.97931e-05	0	0	0	0	0	0	0	0	0	0.000259665	0.000134228	0.000113808	0.000171233	3.1346e-05	3.03582e-05	0	1.93211e-05	5.10061e-05	6.53097e-05	0	0	0.000140682	0	0
Otu0293	Unclassified Bacteria	0.000507357	0	5.8931e-05	0.000132328	0.000785987	0	0	2.9967e-05	0	0.000554595	0.000115068	0	0	4.30274e-05	0	9.28031e-05	0.00023254	0.000387234	0	0.000153692	0	4.11032e-05	0	0	0	0	5.8782e-05	0	2.83238e-05	0.000114806	0	0.000709346	0	0	0	2.84519e-05	0	3.1346e-05	9.10747e-05	0	7.72842e-05	2.5503e-05	0.000108849	0	0	0	0	0
Otu0294	Unclassified Rhizobiales	0.000591916	0	5.8931e-05	0	0	0	0	5.99341e-05	9.48767e-05	0	2.8767e-05	0	0	0	5.06997e-05	0	3.87567e-05	0	0	2.56154e-05	0	0	0	0.000119379	0	0	0	5.67135e-05	0	3.82687e-05	0.000117897	0	0	0	0	0	0	0	0	0	0	0	0	0	0	0	0	0
Otu0295	Unclassified Gammaproteobacteria	0	0	0.000117862	0	0	0	0	0.000269703	0	0	0	0	0	4.30274e-05	0	0	0	0	0	0	0	0	0.000120647	0	0	0	0	0	0.000141619	0	0	0	0	0	0	0	0	0	0	0	0	0	0	0	0	0	0	0
Otu0296	Unclassified Bacteria	0.000845594	0.000179319	0.000707172	0.000264655	0.000112284	0.000496607	0.0002693	0.000449506	0.000332068	0	0	0.000117429	0.00021189	0	5.06997e-05	9.28031e-05	0	0	0	0.000512308	8.3375e-05	0	0	0.000198965	0.000204201	0	2.9391e-05	0.000113427	0	3.82687e-05	3.92989e-05	0	0	0	0	0	0	0	0	0	0	0	0	0	0	0	0	0
Otu0297	Singulisphaera	0.000253678	0.000239091	0	0	0	0	0	8.99011e-05	0	6.52465e-05	0.000402739	0.000146787	0	0.000430274	0.000152099	0.000139205	0.000271297	0.00109716	0.00442366	0.00115269	0.000472458	0.000822064	0.00036194	0.00051731	0.00224621	0	0.000675993	0.000482064	0.000169943	0.000267881	0.000235793	0.00227582	0	0	0	2.84519e-05	3.42466e-05	0	0	0	0	0	0	0	0	0	0.000788252	0
Otu0298	Unclassified Bacteria	0	0	0.000117862	0.000264655	0	0.000165536	8.97666e-05	5.99341e-05	0	0	2.8767e-05	2.93574e-05	0	0	0	0	0	3.22695e-05	0	0	0.000138958	4.11032e-05	0	0	0	0	0	0	0	7.65374e-05	0	0	0	0	0	0	0	0	0	0	0	0	0	0	0	0	0	0
Otu0299	Unclassified Betaproteobacteria	8.45594e-05	0	0	0	0	0	0	8.99011e-05	0	0	0	0	0	0	0.000152099	0	0	0	0	0	0	4.11032e-05	0	0	0	0	0	0	0	0	3.92989e-05	0	0	0	0	0	0.00010274	0	0	0	0	0	0	0	0	0	0	0
Otu0300	Unclassified Sphingomonadaceae	0	0	0	0	0	0	0	0	0	0	0	0	0	0	0	9.28031e-05	0	3.22695e-05	2.79979e-05	0	0	0	0	0	0	0	0	0	2.83238e-05	7.65374e-05	7.85978e-05	8.86682e-05	0	0	0	0	0	0	0	0	0	0	0	0	0	0	0	0
Otu0301	Unclassified Caulobacteraceae	0	0	0.000235724	0	0.00168426	0.000275893	8.97666e-05	5.99341e-05	0	0	0	0	0	0	0.000101399	0	0	0	0	0	2.77917e-05	8.22064e-05	0	0.000198965	0	0	0	0	0	0	0	0	0	0	0	0	0	0	6.07165e-05	0	1.93211e-05	0	0	0	0	0	5.8389e-05	0
Otu0302	Acinetobacter	0	0	0.000117862	0	0	0	0	0	0.000426945	0	8.63011e-05	5.87147e-05	0	8.60548e-05	0	0	0	0	0.00039197	0	0	0	0	0	0	0	0.000440865	2.83567e-05	0.000141619	0	0	0	0.00179572	0	0	0	0	6.2692e-05	0	0	0	0	0	0	0	0	0	0
Otu0303	Magnetospirillum	0.000253678	0.00041841	0.000412517	0.000264655	0.000112284	0.000110357	0.000807899	0	4.74383e-05	3.26232e-05	0.000201369	8.80721e-05	0	0.000430274	0	4.64016e-05	7.75134e-05	3.22695e-05	0	0.000307385	2.77917e-05	0	0	0.000119379	0	0	0	0	0.000368209	0	0	0	0	0	0	0	0	0	0	4.0085e-05	0	7.65091e-05	0	0	0	0	0	0
Otu0304	Unclassified Rhodospirillales	8.45594e-05	0.000239091	0.000176793	0	0	0.000606964	0	0.000269703	0.000379507	0	2.8767e-05	0	3.027e-05	0.00017211	0	0	0	0	0	0	5.55833e-05	0	0	0	0	0	0	0	0	0	0	0	0	0	0	0	6.84932e-05	0	0	0	0	0	0	0	0	0	0	0
Otu0305	Unclassified Betaproteobacteria	0.00118383	0.000239091	5.8931e-05	0	0	0.00038625	0.000448833	8.99011e-05	4.74383e-05	0	0	2.93574e-05	0.00015135	0.000215137	0.000152099	0	7.75134e-05	0	0.000223983	0	0	4.11032e-05	0	0	0	0	0	0	0.000141619	3.82687e-05	0.000235793	0	0	0	6.71141e-05	0	0	0	3.03582e-05	0	3.86421e-05	2.5503e-05	0	0	0	0	0	0
Otu0306	Unclassified Proteobacteria	0	0.000239091	0.000294655	0.000264655	0	0.000331071	0.000359066	0.000539407	9.48767e-05	0	0	0.000146787	0	0	0	0	3.87567e-05	9.68085e-05	0	5.12308e-05	5.55833e-05	4.11032e-05	0.000160862	7.95862e-05	0	0	0.000235128	5.67135e-05	0	0	0.000117897	0	0	0	0	5.69039e-05	6.84932e-05	0	0	4.0085e-05	0	0	8.70796e-05	0	4.71209e-05	0	0	0
Otu0307	Unclassified Bacteria	0	0	0.000942896	0.000198491	0.000785987	0.000331071	0	2.9967e-05	9.48767e-05	0	0.000115068	0.000205502	6.054e-05	0.000129082	5.06997e-05	9.28031e-05	7.75134e-05	6.4539e-05	0	0	5.55833e-05	0.00012331	0	0	0	0	0	0	0	0	7.85978e-05	0	0	0	0	0	0	0	0	0	0	2.5503e-05	0	0	0	0	0	0
Otu0308	Geobacter	0	0	5.8931e-05	0	0	0	0	0	4.74383e-05	0	2.8767e-05	0	0	0	0	0	0	0	2.79979e-05	0	0	0	0	0	0	0	0	0	0	0	0	0	0	0	0	0	0	0	0	0	0	0	4.35398e-05	0	0	0	0	0
Otu0309	Unclassified Bacteria	0	0.000537956	0.00111969	0	0	0.00038625	0.000179533	0.00110878	0.000759013	0.00241412	0	8.80721e-05	0.00015135	0	0	0.000232008	0.000155027	3.22695e-05	0	5.12308e-05	8.3375e-05	0	0	0	0	0	0	0	0.000396533	0	0	0	6.19214e-05	0	0	0	0	0	0	0	0	0	0	0	0	0	0	0
Otu0310	Thiobacillus	0	0	0	0	0	0	0.000179533	8.99011e-05	0	0	0	0	6.054e-05	0	0	0	0	6.4539e-05	0	0	5.55833e-05	0	0	0	0	0	0	0	0	0	0	0	0	0	6.71141e-05	0	0	0	0	4.0085e-05	0	5.10061e-05	0	0	0	0	0	0
Otu0311	Sphingomonas	0	0	0	0	0	0	0	0	0	3.26232e-05	0	0	0	0	0	0	0	0	0	0	8.3375e-05	8.22064e-05	0	0	8.75146e-05	0	0	0	0	0.000267881	0	0	0	0	0	0	0	0	0	0	1.93211e-05	0	0	0	0	0	0	0
Otu0312	Planomicrobium	0.000422797	0.000119546	0.000117862	0.000661638	0.00179654	0	0.0002693	0	0	0	0	0	0	0	0	0	0	0	0	0	0	0	0	0	2.91715e-05	0	0	0	0	0	0	0	0	0	0	0	0	0	0	0	0	0	0	0	0	0	0	0
Otu0313	Unclassified Betaproteobacteria	0	0.00041841	0.00135541	0.000595474	0	0.000110357	8.97666e-05	0.000539407	0.000379507	0	8.63011e-05	2.93574e-05	6.054e-05	0	0.000101399	0.000232008	0.00023254	0.000129078	0	0.000128077	0.000111167	0	0	0.000119379	0	0	8.81731e-05	0.000113427	0	0	3.92989e-05	0	6.19214e-05	0	0	0	0	0	0	0	0	2.5503e-05	2.17699e-05	0	0	0	0	0
Otu0314	Unclassified Myxococcales	0	0.000358637	0.000235724	0.000330819	0.00123512	0.000165536	0.0005386	5.99341e-05	0.000996205	0	0.000115068	0	0.00012108	8.60548e-05	0.000152099	0	3.87567e-05	0	0	0	0.000138958	0.00012331	0	0	0	0	2.9391e-05	2.83567e-05	0	0.000153075	0	0	0.000247686	0	0	0	0	0	0	0	1.93211e-05	0	0	0	0	0	0	0
Otu0315	Unclassified Gammaproteobacteria	0	0	0	0.000132328	0.000112284	0.000662142	0.000628366	0.000269703	0	0	0	0	0	4.30274e-05	0	0	7.75134e-05	0.000129078	5.59957e-05	0.00028177	0	0	4.02156e-05	0	0	0	0.00058782	0.000141784	5.66476e-05	0	0	0	0	0	0	0	0	0	0	0	3.86421e-05	5.10061e-05	0	0	0	0	0	0
Otu0316	Unclassified Comamonadaceae	0	0	0	0	0	0	0	0	0	0	0	0	0	0	0	0	0	0	0	0	5.55833e-05	0	0	0	0	0	0	0	0	0	0	0	0	0	6.71141e-05	5.69039e-05	0	3.1346e-05	0	0	3.86421e-05	0	0	0	0	0	0	0
Otu0317	Unclassified Bacteroidetes	0	5.97729e-05	0.000353586	0.000330819	0.000336852	0.000441428	0.000628366	0.000149835	0.0016129	6.52465e-05	0.00028767	8.80721e-05	0.00018162	0	0.000608396	0.000464016	0.000155027	0	0.000251981	0	8.3375e-05	0	0	3.97931e-05	0.000145858	0	2.9391e-05	0	5.66476e-05	0	0	0	0	0	0	0	0	0	0	0	0	0	0	0	0	0	0	0
Otu0318	Unclassified Flavobacteriaceae	0	0.00041841	0.000176793	0	0	0.000331071	0	0.000359604	0	0	0.000143835	5.87147e-05	0	0	0	0	7.75134e-05	9.68085e-05	0	0	2.77917e-05	0	0	3.97931e-05	0.000875146	0	0.000558429	0	0	0.000114806	0	0	0	0	6.71141e-05	0	0	0	0	0	1.93211e-05	5.10061e-05	0.000130619	0	0	0	0	0
Otu0319	Unclassified Betaproteobacteria	0	0.000179319	0.000530379	0.000264655	0	0.000275893	0	0.000119868	0.000142315	0	0	0	0	0.000688439	5.06997e-05	0	0	0	0	0	0.000111167	0	0	0.000119379	8.75146e-05	0	0	0	0.000169943	0	0	0	0	0	0	0	6.84932e-05	0	3.03582e-05	0	0	0	0.000152389	0	0	0	0	0
Otu0320	Unclassified Sphingobacteriales	0	0.000358637	0.000353586	0	0	0	0.000179533	0.000209769	4.74383e-05	0	2.8767e-05	0.000117429	9.081e-05	0.000215137	0.000101399	0	0	6.4539e-05	0	0	8.3375e-05	8.22064e-05	0	3.97931e-05	0	0	0	8.50702e-05	0	0	0	0	0	0	0	0	0	0	0	0	0	0	0	0	0	0	0	0
Otu0321	Unclassified Bacteria	0	0	0.000235724	0	0	0	0	2.9967e-05	4.74383e-05	0.00120706	0.000632875	0	0	0	0	0	0	3.22695e-05	0	0	0	0	0	0	0	0	0	0	0	3.82687e-05	0	0	0	0	0	0	0	0	0	0	0	0	0	0	0	0	0	0
Otu0322	Unclassified Alphaproteobacteria	0.000507357	0.000179319	0.00135541	0	0.00101055	0.00038625	0.000448833	0.000209769	0.000474383	0	0.000143835	0.000499075	6.054e-05	0.000215137	0.000253498	0.000278409	0.00011627	6.4539e-05	0	0	0.000138958	0	0.000120647	7.95862e-05	0	0	0.000176346	0	2.83238e-05	0	0.000275092	0.000325117	0.000123843	0	0	0	0	0	0	0	0	0	0	0	0	0	0	0
Otu0323	Unclassified Parachlamydiaceae	0.000253678	0	0.000176793	0.000529311	0	5.51785e-05	0.000179533	0	0.000379507	0.000391479	0	0	0	0	0	0	0.000155027	0	0	0	0	4.11032e-05	0	0	0	3.13322e-05	0	0	0	3.82687e-05	0	0	3.09607e-05	0.000259665	0.00033557	8.53558e-05	6.84932e-05	3.1346e-05	6.07165e-05	0.000200425	0.000154568	0.000153018	0.000152389	0	0	0	0	0
Otu0324	Unclassified Bacteria	0	0	0.000294655	0.000264655	0.000561419	0.000275893	0.000448833	0.000928978	0.000474383	9.78697e-05	0.000143835	0.000528433	6.054e-05	0.000301192	5.06997e-05	0.000417614	0.000155027	0.000161348	0	0.000153692	0.000305708	0.000287722	0.000201078	0.000159172	0	0.000125329	0	0.000141784	0.000254914	0.000114806	0	0	3.09607e-05	0	0	0	0	0	0	0	0	0	0	0	0	0	0	0
Otu0325	Unclassified Proteobacteria	0	0.000119546	0.000294655	0.000132328	0	0	0	0	0	0	0	0	0	0	5.06997e-05	0	0	0	0	0	0	0	0	0	0	0	0	0	0	3.82687e-05	0	0	0	0	0	0	0	0	0	0	0	0	0	0	0	0	0	0
Otu0326	Unclassified Bacteria	0.00118383	0.000657501	0.000883965	0.000264655	0.000561419	0.000496607	0	0.000419539	0.00028463	0	2.8767e-05	0.000117429	3.027e-05	0.00017211	0	4.64016e-05	0.000155027	6.4539e-05	0	0	2.77917e-05	0	0.000201078	0.000119379	0	0	0	8.50702e-05	2.83238e-05	0.00030615	7.85978e-05	0	3.09607e-05	5.77034e-05	0	5.69039e-05	0.000205479	0	3.03582e-05	0	0	0	2.17699e-05	0	9.42418e-05	0	0	0
Otu0327	Unclassified Bacteria	0.000761035	0.000119546	0.000353586	0.000595474	0	5.51785e-05	0.0005386	0.000179802	0	6.52465e-05	8.63011e-05	2.93574e-05	9.081e-05	0	0	0	0	3.22695e-05	0	0	2.77917e-05	4.11032e-05	0	7.95862e-05	0	0	0	0	0	7.65374e-05	0	0	0	0	0	0	0	0	0	0	0	0	0	0	0	0	0	0
Otu0328	Bdellovibrio	0	0	0	0	0	0	0	0	0	0	0	0	0	0	0.000152099	0	7.75134e-05	0	0	0	2.77917e-05	4.11032e-05	4.02156e-05	0	5.83431e-05	3.13322e-05	2.9391e-05	0	0	0	0	0	3.09607e-05	2.88517e-05	0	0	0	0	0	0	0	0	0	0	0	0	0	0
Otu0329	Bdellovibrio	0	0	0.000825034	6.61638e-05	0	5.51785e-05	0	0.000329637	0.000142315	6.52465e-05	0.000143835	0.000176144	0.00012108	0.000215137	5.06997e-05	9.28031e-05	7.75134e-05	6.4539e-05	0	0	0.000222333	8.22064e-05	4.02156e-05	3.97931e-05	0	0	0.000117564	0.000113427	0.000198267	0.00030615	0	0	6.19214e-05	0	0	0	0	0	0	0	0	2.5503e-05	0	0	0	0	0	0
Otu0330	Inhella	0.000591916	0	0.000176793	0.000264655	0.000449135	0.000441428	8.97666e-05	2.9967e-05	0.000474383	0	0	8.80721e-05	0	4.30274e-05	0.000152099	0	0	0	0	0	0	0	0	0	0	0	0	2.83567e-05	0	0.000114806	0	0	0	0	0	0	3.42466e-05	0	0	0	0	0	0	0	0	0	0	0
Otu0331	Unclassified Rhodospirillales	0	0.000239091	0.000117862	0	0.000449135	0.00038625	0	0.000209769	0.000426945	0	0	0	0	0	0	4.64016e-05	0	0	0	0	0	0	0	0	2.91715e-05	0	0	0	0	3.82687e-05	0	0	0	5.77034e-05	6.71141e-05	8.53558e-05	6.84932e-05	0	0	0	1.93211e-05	2.5503e-05	2.17699e-05	0	0	0	0	0
Otu0332	Unclassified Gammaproteobacteria	0.000422797	0.000119546	0	0.000661638	0	0.000165536	0.000628366	5.99341e-05	9.48767e-05	0	0	0	6.054e-05	0	5.06997e-05	0	0	0	0	0	0	0	0	0	0	0	0	8.50702e-05	0	0	7.85978e-05	0	0	5.77034e-05	3.3557e-05	5.69039e-05	6.84932e-05	0	3.03582e-05	0.00016034	1.93211e-05	2.5503e-05	4.35398e-05	0	0	0	0	0
Otu0333	Rhizobium	0.000676476	0	0	0	0	0.000165536	0	2.9967e-05	0.000189753	0	0	0	0	0	0	0	0	0	0	0	0	0	0	0	0	0	0	0	0	0	0	0	0	8.65551e-05	0	2.84519e-05	0.00174658	0	0	0	0	0.00175971	4.35398e-05	0	0	0	0	0.00150257
Otu0334	Unclassified Betaproteobacteria	0	0.000179319	0.000117862	0.000198491	0.000224568	5.51785e-05	0.000359066	0.000269703	0.000521822	0	8.63011e-05	0	0	0	0	0	0	0	0	0	2.77917e-05	8.22064e-05	0	3.97931e-05	0	0.000219326	0	0	0	0	0	0	0.000123843	0	0	0	0	0	0	0	0	0	0	0	0	0	0	0
Otu0335	Legionella	0.000507357	0.000239091	0.000294655	0.000463147	0	0.000717321	8.97666e-05	0.000359604	0.000996205	0	0	0.000176144	0	0.000129082	0	0	0	3.22695e-05	0	0	0	8.22064e-05	4.02156e-05	0	0.000116686	0	0	2.83567e-05	0	0	0	0	0	0.000201962	0.000167785	0.000170712	0.000273973	0.000125384	9.10747e-05	0.000120255	5.79632e-05	0.000280534	0.000217699	0	9.42418e-05	0	5.8389e-05	0.000113401
Otu0336	Unclassified Bacteria	0	0.000298864	0.000766103	0	0	0	0	0.000119868	0	0.000293609	0	0	0	0	0	0.000139205	3.87567e-05	0	0	0	5.55833e-05	0	0	0	0	0	5.8782e-05	8.50702e-05	0.00022659	7.65374e-05	0.000314391	0	0	0	0	0	0	0	0	0	0	0	0	0	0	0	0	0
Otu0337	Sphingomonas	0	0	0	0	0	0	0	0	0	0	0	0.000117429	0	0	0.000253498	0	0	0	0	0	0	0	0	0	0	0	0	0	0	3.82687e-05	0	0	0	0	0	0	0	0	0	0	0	0	0	0	0	0	0	0
Otu0338	Unclassified Bacteria	8.45594e-05	0	0.000176793	0.000198491	0.000336852	0	0	8.99011e-05	0.000142315	0	0	5.87147e-05	0	0	0.000101399	0	0	0	0	0	0	8.22064e-05	0	0	0	0	8.81731e-05	0	0	0	0	0	0	0	0	0	0	0	0	0	0	0	0	0	0	0	0	0
Otu0339	Sphingopyxis	0	0	0	0	0	0	0	0	0	0	0	0	0	0.000129082	0	4.64016e-05	0	3.22695e-05	0	0	0	0	0	0	5.83431e-05	0	0	0	0	0	3.92989e-05	0	0	0	0	0	0	0	0	0	0	0	0	0	0	0	0	0
Otu0340	Unclassified Bacteria	0.00109927	0	0.000117862	0.000330819	0	0.000110357	0.0002693	0	4.74383e-05	0	0	0	0	0	0	0	0	0	0	0	2.77917e-05	4.11032e-05	0	0	0	0	0	0	0.000169943	0	0	0	0	0	0	0	0	0	0	0	0	0	0	0	0	0	0	0
Otu0341	Sulfuricurvum	0.000253678	0	0.000176793	0	0.00123512	5.51785e-05	0	0.000689242	0.000189753	0	0.000172602	0	0	0	0.000304198	0	0	0.000161348	0	0.000179308	2.77917e-05	0.000328826	0.000120647	0.000119379	5.83431e-05	0	5.8782e-05	0	0.000141619	0.000114806	0	0	9.28821e-05	2.88517e-05	0	0	0	0	3.03582e-05	0	0	0	2.17699e-05	0	0	0	0	0
Otu0342	Bdellovibrio	0.000591916	0.000179319	0.000530379	6.61638e-05	0.00157197	0.000110357	8.97666e-05	0.000149835	0.00056926	0	0	0.000352288	6.054e-05	0.000473301	0.000304198	0.000278409	0.00011627	0.000548582	0	0.000230539	0.000111167	4.11032e-05	0	0.000119379	0.000670945	0	0	0	0.000509828	0	0	0.000443341	0	0	0	0	0	0	0	0	0	0	0	0	0	0	0	0
Otu0343	Bdellovibrio	0	0.00041841	0.001709	0.000264655	0	0.000165536	0.0005386	0.000599341	0.000189753	0.000717711	0.000201369	0.000411003	0.00054486	0.000258164	0.000304198	0.000371212	0.000387567	0	0	0.000230539	0.000138958	0.00012331	0.000160862	3.97931e-05	0.000204201	3.13322e-05	0	0.000340281	8.49714e-05	0	0	0	0	0	0	0	0	0	0	0	0	0	0	0	0	0	0	0
Otu0344	Unclassified Betaproteobacteria	0.000253678	0.000358637	0.000412517	0	0.00134741	0.000110357	0.000359066	0.000209769	0.000474383	0.000228363	5.75341e-05	2.93574e-05	0.00015135	0	0.000101399	4.64016e-05	7.75134e-05	6.4539e-05	0	0	8.3375e-05	0.00012331	0	0	2.91715e-05	0	0	0	0	0.000191344	0.000117897	0	0	0	0	0	0	0	0	0	0	0	0	0	0	0	0	0
Otu0345	Unclassified Bacteria	0.00101471	0.000657501	0.000353586	0.000132328	0.000224568	0.00110357	0.0002693	0.00029967	0.00085389	0	0	2.93574e-05	9.081e-05	0	0	4.64016e-05	0.00011627	9.68085e-05	0	0	2.77917e-05	4.11032e-05	0	0	0	0	0.000529038	0	0.00022659	0	0	0	0	2.88517e-05	6.71141e-05	0	6.84932e-05	0	0	4.0085e-05	5.79632e-05	7.65091e-05	0.000108849	0	0	0	5.8389e-05	0
Otu0346	Unclassified Betaproteobacteria	0	0	0	0	0	0	0	0	0	3.26232e-05	0	0	0	0	0	0	0.000193783	0	0	2.56154e-05	2.77917e-05	0	0	0	0	0	0	0	0	0	0	0	0	0	0	0	0	0	0	0	0	0	0	0	0	0	0	0
Otu0347	Unclassified Gammaproteobacteria	0.000845594	0.000179319	0.000471448	0	0	0.000165536	0.000628366	0.000209769	0	0	0	0	0	0.00017211	0	4.64016e-05	7.75134e-05	0	0	0	2.77917e-05	4.11032e-05	0	0	0	0	0	0	5.66476e-05	0	0	0	0	0	0	0	0	0	0	0	0	0	0	0	0	0	0	0
Otu0348	Bdellovibrio	0.000761035	0.00041841	0.00294655	0.000132328	0.00179654	0.000441428	0.000897666	0.000779143	0.00156546	0.00110919	0.000373972	0.000440361	0.00048432	0.000430274	0.000861894	0.000232008	0.000387567	0.000161348	0	0.000486693	5.55833e-05	0.000328826	0.000281509	0.000318345	0	3.13322e-05	0.00141077	0.000226854	0	0.000841912	0.000196495	0	9.28821e-05	0	0.000100671	0	0	0	0	0	1.93211e-05	0	0	0	0	0	0	0
Otu0349	Unclassified Chitinophagaceae	0	0	0	0	0	0	0	0	0	0	0	0	0	4.30274e-05	0	0	0	0.000290426	0.00109192	0.000640385	0.000416875	0.000739858	0.000603233	0.000318345	0.0012252	0	2.9391e-05	0	0	0	0	0	0	0	0.000302013	0.000170712	0	0	0	0.0008017	0.000946732	0	0	0	0	0	0.00113859	0
Otu0350	Syntrophomonas	0	0.000358637	5.8931e-05	0.000264655	0	0.000165536	0.000179533	0	0	0	0	2.93574e-05	0.00066594	0	0.000101399	0	7.75134e-05	0	0	0.000179308	0	0	8.04311e-05	0	0	0	0	0	0	0	0	0	0	2.88517e-05	0	0	0.00010274	0	0	0	0	5.10061e-05	4.35398e-05	0	0	0	0	0
Otu0351	Unclassified Bradyrhizobiaceae	0	0	0	0	0	0	0	0	0	0	0	0	0	0	0	0.000139205	7.75134e-05	0	0	0	0	0	0	0	0	0	0	0	0	0	0	0	0	0	0	0	0	0	0	0	1.93211e-05	0	0	0	0.000188484	0	0	0
Otu0352	OD1_genus_incertae_sedis	0.000422797	0.000179319	0.000294655	0.000132328	0	0.000441428	8.97666e-05	0.00080911	9.48767e-05	6.52465e-05	0	8.80721e-05	0	0	0	9.28031e-05	0	0	0	0	0	0	0	0.000278552	0	0	2.9391e-05	0	0	0	0	0	0	0	0	0	0	0	0	0	0	0	4.35398e-05	0	0	0	0	0
Otu0353	Legionella	0.00118383	0.000478183	0.000825034	0.000264655	0	0.000938035	0.0010772	0.000659275	0.000332068	0	0.000345205	2.93574e-05	3.027e-05	0	0	0	0	0	0	0	2.77917e-05	0.000164413	0.000120647	0	0	0	0	0	0	0	3.92989e-05	0	0	0.000288517	0.000234899	0.000113808	0.000239726	3.1346e-05	0.000273224	8.017e-05	5.79632e-05	5.10061e-05	0.000370088	0	4.71209e-05	3.51704e-05	8.75836e-05	0
Otu0354	Unclassified Burkholderiales	0.00152207	0.000119546	5.8931e-05	0.000396983	0	0.000717321	0.000179533	0.000179802	9.48767e-05	3.26232e-05	0	0	0	0	0	9.28031e-05	7.75134e-05	0	0	0	0	4.11032e-05	0	0.000119379	0	6.26645e-05	5.8782e-05	0.000113427	0	0	0	0	0	0	0	0	0	0	0	0	0	0	0	0	0	0	0	0
Otu0355	Unclassified Bacteria	0	5.97729e-05	0.000235724	0.000198491	0	0	0.000359066	8.99011e-05	0	0	5.75341e-05	0.000117429	0	0	0.000152099	0	0.00011627	6.4539e-05	0	0	0	8.22064e-05	0	0	2.91715e-05	0	0.000352692	0	2.83238e-05	0	0	0	0	0	0	0	0	0	0	0	0	0	0	0	0	0	0	0
Otu0356	Unclassified Microbacteriaceae	0	0	0	0	0	0	0	0	0	0	0	0	0	0	0	4.64016e-05	7.75134e-05	0	0	0	5.55833e-05	8.22064e-05	0	0	0	0	0	0	0.000113295	0	0	0	0	0	0	0	0	0	0	0	0	0	0	0	0	0	0	0
Otu0357	Unclassified Alphaproteobacteria	0.000338238	0.000358637	0.000353586	0	0.000112284	0.00038625	8.97666e-05	0.000359604	4.74383e-05	0	0.000115068	0.000117429	0.00024216	0	0	9.28031e-05	0	9.68085e-05	0	0	0	0	0	0	0	0	0	0	0	0	0	0	0	5.77034e-05	6.71141e-05	0	0	0	0	0	0	0	4.35398e-05	0	0	0	0	0
Otu0358	Unclassified Acetobacteraceae	0	5.97729e-05	0.000471448	0	0	0.00038625	0.000179533	0.00029967	9.48767e-05	0.000195739	0	2.93574e-05	0	0	0.000101399	0	0	0	0	0	0	0	0.000120647	0	0	0	0	0.000113427	0.000113295	0	0	0	0	0	0	0	0	0	0	0	0	0	2.17699e-05	0	0	0	0	0
Otu0359	Unclassified Bacteria	0	0.000298864	0.00117862	0	0.000449135	0	0.000179533	0.000149835	0	0	0	0	0.0003027	8.60548e-05	5.06997e-05	0	0	6.4539e-05	0	0.000102462	2.77917e-05	0	0	0	0	0	0.00029391	0	8.49714e-05	3.82687e-05	0	0	0	0	0	0	0	0	0	0	0	0	0	0	0	0	0	0
Otu0360	Unclassified Bacteria	0	0	5.8931e-05	0	0.00101055	0.000275893	0	0.000449506	0.000474383	0	5.75341e-05	0	0	0	0	9.28031e-05	0	0	0	0.000435462	5.55833e-05	0	0	3.97931e-05	0	0	0	0	0	0	0.000157196	0	0	0	0	0	0	0	0	0	0	0	0	0	0	0	0	0
Otu0361	Algoriphagus	0	0	5.8931e-05	0	0	5.51785e-05	0.0002693	0.000209769	0	0	0	0	0	0	0.000101399	4.64016e-05	0	3.22695e-05	0.000251981	0	0	4.11032e-05	0	0	0	0	0	0	0	0.000229612	0	0	0	0	0	0	0	0	0	0	0	0	6.53097e-05	0	0	0	0	0
Otu0362	Rhodanobacter	0	0.000537956	0.000294655	6.61638e-05	0.000336852	0	0	0	0.000806452	0	0	8.80721e-05	0	0	0	0	0	0	0	0	2.77917e-05	0	0.000160862	0	0	0	0	8.50702e-05	0	7.65374e-05	0	0	0	0	0	0	0	0	0	0	1.93211e-05	0	0	0	0	0	0	0
Otu0363	Unclassified Syntrophaceae	0	0.00041841	0	6.61638e-05	0.00123512	0	8.97666e-05	2.9967e-05	0.000189753	0	0.000258903	0	0	4.30274e-05	5.06997e-05	0	0	3.22695e-05	0	0	0	0	0	0	0	0	0	0	0	0	0	0	0	0	0	5.69039e-05	0	3.1346e-05	3.03582e-05	0	3.86421e-05	0	6.53097e-05	0	0	0	0	0
Otu0364	Sphingobium	0	0	0	0	0	0	0	0	0	0	2.8767e-05	0	6.054e-05	0.000344219	0	4.64016e-05	0	0	0	0	0	0	0	3.97931e-05	0	0	0	0	0	0	0	0	0	0	0	0	0	6.2692e-05	0	0	0	0	0	0	0	0	0	0
Otu0365	Unclassified Proteobacteria	0	0	0	0.000463147	0.000336852	0.00038625	0	0.000419539	0	0	0	0	0	0	0	0	0	6.4539e-05	0	0	0	0	0	0	0	0	0	0	5.66476e-05	0	3.92989e-05	0	0	0	0	0	0	0	0	0	3.86421e-05	5.10061e-05	0	0	0	0	0	0
Otu0366	Planctomyces	0	0.000298864	0.000942896	6.61638e-05	0.00101055	0.000331071	0.0002693	0.00050944	0.000664137	0	2.8767e-05	2.93574e-05	0	0	0.000152099	0.000185606	7.75134e-05	0	0	7.68462e-05	2.77917e-05	0.000205516	0	0.000397931	0	0	0	0	0	0.000114806	0	0	0	0.000519331	0.000302013	0.000483683	0.000547945	9.4038e-05	0.000394657	0.00040085	0.00017389	0.000280534	0.000370088	0	0.000424088	0	0	0
Otu0367	Unclassified Rhizobiales	0	0.000119546	0	0	0	0	0	0	0	0	0	0	0	0	0	0	0	0	0	0	0	0	0	0	0	0	0	0	0	0	0	0	0	0	0	0	3.42466e-05	0.000532882	0	0	0	0	0	0.0020127	0	0	0	0
Otu0368	OD1_genus_incertae_sedis	8.45594e-05	0	0.000648241	0.000264655	0.000336852	0.000275893	0.000807899	0.000149835	9.48767e-05	0	0.000431506	0.000176144	0	0.000129082	5.06997e-05	4.64016e-05	0.00023254	0.000419504	0	0.000179308	0.000250125	8.22064e-05	0	0.000198965	0.000145858	0	2.9391e-05	0.000226854	0	0	0.000157196	5.91121e-05	0.000247686	0	0	0	0	0	0	0	0	0	0	0	0	0	0	0
Otu0369	Unclassified Bacteria	0	0	0	0	0	0	0	0	4.74383e-05	0	0.000115068	0.000146787	0	0	0	0.000139205	0	0	0	0	0	0	0	0	0	0	0	0	0	0	0	0	0	0	0	0	0	0	0	0	0	0	0	0	0	0	0	0
Otu0370	Unclassified Rhizobiales	0.000169119	0	0	0	0	0	0	5.99341e-05	0	0	0.000258903	0	0	0	0	9.28031e-05	3.87567e-05	0.000258156	0	0	0	0	0	3.97931e-05	0	0	0	0	0	0	0	0	0	0	0	0	0	0	0	0	0	0	0	0	0	0	0	0
Otu0371	Unclassified Betaproteobacteria	0	0	0	0	0	0	0	0	0	0	0	0	0	4.30274e-05	0	0	0	0	0	0	0	8.22064e-05	0	3.97931e-05	0	0	0	0	0	3.82687e-05	0	0	9.28821e-05	0	0	0	0	0	0	0	0	0	0	0	0	0	0	0
Otu0372	OD1_genus_incertae_sedis	8.45594e-05	0	0.00129648	0	0	0	8.97666e-05	0.00029967	0	6.52465e-05	0.000316437	0	6.054e-05	8.60548e-05	0	0.000232008	0.000155027	0	0	0	8.3375e-05	0.000205516	0	3.97931e-05	5.83431e-05	0.000125329	5.8782e-05	0.000226854	2.83238e-05	0.000191344	0.000196495	0	0	0	0	0	0	0	0	0	0	0	0	0	0	0	0	0
Otu0373	Psychrobacter	0	0	0	0	0	0	0	0	0	0	0	0	0	0	0	4.64016e-05	0	0	2.79979e-05	0	0	0	0	0	0	3.13322e-05	2.9391e-05	0	0	0	0	8.86682e-05	0	0	0	0	0	0	0	0	0	0	0	0	4.71209e-05	0	0	0
Otu0374	Unclassified Betaproteobacteria	0	0	0	0	0	0	0	0	0	0	0	0	9.081e-05	0	0	4.64016e-05	0	0	0	0	0	0	0	0	0	0	0	0	0	3.82687e-05	0	0	0	0	0	0	6.84932e-05	0	0	0	0	0	8.70796e-05	0	0	0	0	0
Otu0375	Unclassified Bacteroidetes	0.00186031	0.000179319	0.000766103	0	0	0	0	0.000239736	0.00028463	9.78697e-05	0.00048904	0.000587147	3.027e-05	0.000731466	0.000202799	4.64016e-05	0.000193783	3.22695e-05	0	0.000128077	8.3375e-05	4.11032e-05	0.000241293	0	0.000437573	0	0.000558429	0.000141784	0	0	0	0	0	0	0	0	0	0	0	0	0	0	0	0	0	0	0	0
Otu0376	Unclassified Rhodobacteraceae	0	0.000119546	0	0	0	0	0	0	0	0	0	0	0	0	0	0	0	0	0	0	0	0	0	0	0	0	0	0	0	0	0	0	0	5.77034e-05	0.000100671	0	0	0	0	0	0	0.000102012	2.17699e-05	0	0	0	0	0
Otu0377	Legionella	0	0	0.000235724	6.61638e-05	0	0.000496607	0	8.99011e-05	0.00156546	0	0	0	0	0	0	0	0	0	0	0	0	0	0	0	0	0	0	0	0	0	0	0	0	0.00017311	0.000167785	0.000170712	6.84932e-05	3.1346e-05	0	0.00024051	0	5.10061e-05	0.000174159	0	0	0	0	0
Otu0378	Turneriella	0	0.000179319	0.000235724	0	0	0	0	0	0	0	0.000115068	0	0	0.000215137	0.000101399	0.000139205	0.00023254	0	0	0	0.000111167	0.000164413	0	0	0	0	0.000264519	0	0	3.82687e-05	0	0	0	0	0	0	0	0	0	0	0	0	0	0	0	0	0	0
Otu0379	Gp1	0	0	0	0	0	0	0	0	0	0	0	0	0	0	0	0	0	0	0	0	0	0	0	0	0	0	0	0	0	0	0	0	0	0	0	0	0	0	0	0	0	0	0	0	0	0	0	0
Otu0380	Unclassified Proteobacteria	0	0	0	0	0	0	0	0	0	0	0	0	0	0	0	0	0	0	0	0	0	0	0	0	0	0	0	0	0	0	0	0	0	0	0	0	6.84932e-05	0	0	0.000120255	0	0	0	0.000138807	0	0	0	0
Otu0381	Blastopirellula	0	0	0.000294655	0	0.000224568	0	0	0.000419539	0	0	0	5.87147e-05	0	0	0.000101399	9.28031e-05	0	0	0	0	8.3375e-05	0	0	3.97931e-05	0	0	0	0.000113427	0.000339886	0	0	0	0	0	0	8.53558e-05	0	0	0	0	0	0	0	0	0	0.000140682	0	0
Otu0382	Unclassified Burkholderiales	0	0	0	0	0	0	0	0	0	0	0	0	0	0	0	0	0	0	0	0	0	0	0	0	0	0	0	0	0	0	0	0	0	0	0	0	3.42466e-05	0	3.03582e-05	4.0085e-05	0	0	0	0	0	0	0	0
Otu0383	Unclassified Proteobacteria	0	0.000179319	5.8931e-05	0	0.000112284	0.000220714	8.97666e-05	0.000179802	4.74383e-05	0	0.000172602	0	0	0.00017211	5.06997e-05	0	0	0	0	0	2.77917e-05	0	0	0	0	0	0	0	0	0	0	0	0	0	0	0	0	0	0	0	0	0	4.35398e-05	0	0	0	0	0
Otu0384	Meiothermus	0.00211399	0.000239091	0.000294655	0.00086013	0	0.00038625	0	0.000449506	0.000521822	0.000358856	0	0	0	0	0.000101399	9.28031e-05	0.000426324	0	0	0	5.55833e-05	0	0.000120647	0	0	0	0	0	0.000566476	0	0	0	0	8.65551e-05	3.3557e-05	8.53558e-05	3.42466e-05	6.2692e-05	0	0.00016034	5.79632e-05	0	0.000108849	0	0	0	0	8.50509e-05
Otu0385	Unclassified Bacteria	0	5.97729e-05	0.00129648	0.000727802	0.000336852	0.000551785	8.97666e-05	0.000539407	0	0.000456725	0.000258903	0.000352288	0.00036324	4.30274e-05	0.000202799	4.64016e-05	3.87567e-05	0.000322695	0	2.56154e-05	0	8.22064e-05	8.04311e-05	0	0	0	8.81731e-05	0	0	0.000344419	0.000432288	0	0.000278646	0	0	0	0	0	0	0	0	0	0	0	0	0	0	0
Otu0386	Parachlamydia	0	0	0.000176793	0	0	0	0	8.99011e-05	0.00028463	0	0	0	0	0	0	0	3.87567e-05	0	0	0	0	0	4.02156e-05	0	0	0	0	0	0	0	0	0	0	2.88517e-05	0	8.53558e-05	0.000136986	0	3.03582e-05	8.017e-05	0	0	0	0	0	0	0	0
Otu0387	Alkalibacter	0	5.97729e-05	0	0	0.000561419	0	0	0	4.74383e-05	0	8.63011e-05	0	0	0	0	4.64016e-05	0	0	0	0	0	0	0.000120647	0	0	0	0	0	0.000198267	0	0	0	0	0	0	0	0	0	0	0	0	0	0	0	0	0	0.000116778	0
Otu0388	Unclassified Chlamydiales	0.000169119	0	0.000117862	0.000132328	0	5.51785e-05	8.97666e-05	2.9967e-05	0.000237192	0	0	0.000117429	0	0.000516329	0	4.64016e-05	0.000193783	0	0	0	8.3375e-05	4.11032e-05	0	0	0	0	0	0	0	0	0	0	0	0	0	0	0.00010274	0	0	4.0085e-05	1.93211e-05	0	0	0	0	0	0	0
Otu0389	Unclassified Alphaproteobacteria	0	0	0	0	0	0.000496607	0.0013465	2.9967e-05	0	0	0	0	0	0	0	0	0	0	0	0	0	0	0	0	0	0	0	0	0	0	0	0	0	0	0	0	0	0	0	0	0	0	0	0	0	0	0	0
Otu0390	Unclassified Bacteria	0	0	0	0	0.000112284	0	0	0.000239736	0	0	0.000115068	0	0	0	0	0	0	0	0	0.000102462	0	4.11032e-05	0	0	0	0	0	0	0	0	0	0	0	0	0	0	0	0	0	0	0	0	0	0	0	0	0	0
Otu0391	Unclassified Bacteria	0.000507357	0	0.000235724	0	0	0.000110357	0	0.000239736	0.000189753	3.26232e-05	0	5.87147e-05	0	0.00017211	0	9.28031e-05	0	0.000387234	0	0	0	0	0	0	0	0	0	0	0	0	0	0	0	0	6.71141e-05	2.84519e-05	0	0	0	0	0	0	0	0	0	0	0	0
Otu0392	Unclassified Acidobacteria_Gp3	0	5.97729e-05	0.000117862	0	0	0	0	5.99341e-05	0.000379507	0	0	0	0	0.000473301	0	9.28031e-05	0	6.4539e-05	0	0	5.55833e-05	0	0	3.97931e-05	0	0	0	0	0	0.000114806	0	0	0	0	0	0	0	0	0	0	0	0	0	0	0	0	0	0
Otu0393	Unclassified Proteobacteria	0	0	5.8931e-05	0.000132328	0	5.51785e-05	0	0.000119868	4.74383e-05	0	0	0	0	0	0	0	0.000193783	0	0	0	0	4.11032e-05	0	0	0	0	0	0	5.66476e-05	0	0	0	0	0	0	0	0	0	0	0	0	0	0	0	0	0	0	0
Otu0394	Unclassified Rhodobacteraceae	0	0	0	0	0	0	0	0	0	0	0	0	0	0	0	0	0	0	2.79979e-05	0	0	0	0	0	2.91715e-05	0	0	0	0	7.65374e-05	0	2.95561e-05	0	0	0	0	0	0	0	0	0	0	0	0	0	0	2.91945e-05	0
Otu0395	Unclassified Bacteria	0	0	0	0	0	5.51785e-05	0	8.99011e-05	4.74383e-05	0	0	0	0	0	0	0	0	0	0	0	0	0	0	0	0	0	0	0	0	0	0	0	0	0	0	0	0	0	0	0	0	0	0	0	0	0	0	0
Otu0396	Unclassified Bacteria	0	0	0	0	0.000561419	0	0	0	0	0	5.75341e-05	0	0	0	5.06997e-05	0	0.000310053	0.000290426	0	0	0.000111167	0	0.000482587	0	0	0	0	0	0	0	0	0	0	0	0	0	0	0	0	0	0	0	0	0	0	0	0	0
Otu0397	Unclassified Bacteria	0	0.000179319	0	0	0	0	0.000179533	2.9967e-05	0	0	0.000201369	0	0	0	0	9.28031e-05	0.000155027	0.000161348	0	0.000563539	2.77917e-05	0	0	0	0	0	0	0	0	0.000497493	0	0	0	0	0	0	0	0	0	0	0	0	0	0	0	0	0	0
Otu0398	Unclassified Proteobacteria	0	0.000119546	0	0	0	5.51785e-05	0.000179533	0	0.000901328	0	0	0	0	0	0	0	0	0	0	0	0	0	8.04311e-05	0	0	0	0	0	0.000339886	0	0	0	0	0	0	0	0	0	0	0	0	0	0	0	0	0	0	0
Otu0399	Unclassified Bacteria	0	5.97729e-05	5.8931e-05	0	0	0.000110357	0.000179533	0.000179802	0	0	0	0.000117429	9.081e-05	0	0	9.28031e-05	7.75134e-05	0	0.000559957	0	0	0	0	0	0.000175029	0	0	5.67135e-05	0	0	0	0	0	5.77034e-05	0	0	0	0	0	0	0	0	0	0	0	0	0	0
Otu0400	Unclassified Chitinophagaceae	0	0	0	0	0	0	0	0	0	0	0	0	0	0	0	0	0	0	0	0	0	0	0	0	0	0	0	0	0	0	0	0	0	0	0	0	0	0	0	0	0	0	0	0	0	0	0	0
Otu0401	Sphingomonas	0	0	0	0	0	0	0	0	0	0	0	0	0	8.60548e-05	5.06997e-05	0	0.000155027	0	0	0	0	0	0	0.000159172	0	0	0	5.67135e-05	0	0	7.85978e-05	0	6.19214e-05	0	0	0	0	0	0	0	0	0	0	0	0	0	0	0
Otu0402	Unclassified Betaproteobacteria	0	0	0	0	0	0	0	0	0	0	0	0	0	0	0	0	0	0	0	0	0	0	0	0	0	0	0	0	0	0	0	0	0	0	0	0	0	3.1346e-05	0	0	0	0	8.70796e-05	0	0	0	0	0
Otu0403	Unclassified Actinomycetales	0	0	0	0	0	0	0	0	0	0	0	2.93574e-05	0	0	0	0	0	0	0	0	0	4.11032e-05	0	0	0	3.13322e-05	0	0	0	0	0	0	0	0	0	0	0	0	0	0	0	0	0	0.000138807	0	0.000105511	0	0
Otu0404	Unclassified Bacteroidetes	0.000253678	0	5.8931e-05	0	0	0	0	5.99341e-05	4.74383e-05	0	8.63011e-05	0	9.081e-05	0	0	4.64016e-05	0	0	0	5.12308e-05	2.77917e-05	0	0	0.000159172	0	0	0	2.83567e-05	0	0	0	0	0	0	0	0	0	0	0	0	0	0	0	0	0	0	0	0
Otu0405	Unclassified Proteobacteria	0	5.97729e-05	0.000235724	0.000132328	0	5.51785e-05	0	0	0	0	0	2.93574e-05	0	4.30274e-05	0	0	0	0	0	0	0	4.11032e-05	0	0	0	0	5.8782e-05	0	5.66476e-05	0	0	0	0	0	0	0	0	0	0	0	0	0	0	0	0	0	0	0
Otu0406	Unclassified Betaproteobacteria	0	0	0	0	0	0	0	0	0	0	0	8.80721e-05	0.00015135	0	0	0	0	0	0	7.68462e-05	0	0	0	0	2.91715e-05	0	0	0	2.83238e-05	3.82687e-05	0	0	0	0	0	0	0	0	0	0	0	0	0	0	0	0	0	0
Otu0407	Unclassified Gammaproteobacteria	0	5.97729e-05	0.00106076	0	0	0	0	2.9967e-05	0	0	0	0	0	0	0	0	0	0	0	0	8.3375e-05	0.00012331	0	0	0	0	0	2.83567e-05	0	0	0	0	0	0	0	0	0	0	0	0	0	0	0	0	0	0	0	0
Otu0408	Gp6	0	0	5.8931e-05	6.61638e-05	0	0	0.000359066	5.99341e-05	0	0	0.000143835	0	0	0	5.06997e-05	0	3.87567e-05	0.000193617	0	0	2.77917e-05	0.00012331	0	0	0	0	0	0	0	0	0	0	0.000959782	0	0	0	0	0	0	0	0	0	0	0	0	0	0	0
Otu0409	Lacibacter	0	0	0	0	0	0	0	0	0	9.78697e-05	5.75341e-05	0.000176144	0	0	0.000101399	0	0	0	0	0	0.000361292	4.11032e-05	0.000402156	0.000119379	0.00075846	0	0	0	0	0	0	0	0	0	0	0	0	0	3.03582e-05	8.017e-05	0	0	4.35398e-05	0	0	0	0	0
Otu0410	Unclassified Bacteria	0	5.97729e-05	0	0.000198491	0	0	0	5.99341e-05	0	0	0	0	0	0	0	0	0	0	0	0	0	0	0	0	0	0	0	0	0	0	0	0	0	0	0	0	0	0	0	0	0	0	0	0	0	0	0	0
Otu0411	Bdellovibrio	0	5.97729e-05	0.000117862	0	0.000336852	0	0.0002693	0	9.48767e-05	0	0.000201369	0.000176144	0	0	0	0	0	9.68085e-05	0	0	0	0.000164413	0	3.97931e-05	0	0	0	0	0	0	0	0	0	0	0	0	0	0	0	0	0	0	0	0	0	0	0	0
Otu0412	Unclassified Bacteria	0	0	0.000235724	6.61638e-05	0	0	0.000448833	0.000209769	0	0	5.75341e-05	0	0	0	0	0	0	6.4539e-05	0	0	5.55833e-05	0	0	0	0	0	2.9391e-05	0.000113427	0	0	3.92989e-05	0	0.000154804	0	0	0	0	0	0	0	0	0	0	0	0	0	0	0
Otu0413	Unclassified Deltaproteobacteria	0	5.97729e-05	0	0	0.000112284	5.51785e-05	0.0002693	0.000209769	0.000189753	0	0	0	0	0	0	0	0	9.68085e-05	0	0	2.77917e-05	0	0	0	0	0	0	0	0	0	0	0	0	0	0	0	0	0	0	0	0	0	0	0	0	0	0	0
Otu0414	Novosphingobium	0	0	0	0	0	0	0	0	0	0	2.8767e-05	0	9.081e-05	0	0	9.28031e-05	0	6.4539e-05	0	0	0	0	0	0	0	0	0	0	0	0	0	0	0	8.65551e-05	0	0	0	0	0	0	0	0	0	0	4.71209e-05	0	0	0
Otu0415	Roseococcus	0	5.97729e-05	0	0	0	0.000110357	0	2.9967e-05	0	0	0	0	0	0	0	9.28031e-05	0	0	0	0	0	8.22064e-05	0	0	0	0	0	0	0	0	0	0	0	0	0	2.84519e-05	0	0	0	8.017e-05	1.93211e-05	0	4.35398e-05	0	0	0	0	0
Otu0416	Unclassified Leptotrichiaceae	0.00177575	0	0	0	0	0	0	0	0	0	0	0	0	0	0	4.64016e-05	0	0	0	0	0	0	0	0.000119379	0	0	0	0	0	0	0	0	0	0	0	0	0	0	3.03582e-05	0	0	0	0	0	0	7.03408e-05	0	0
Otu0417	Unclassified Bacteria	0	5.97729e-05	0.000294655	0.000132328	0.000449135	0.000220714	0.0002693	0.00050944	9.48767e-05	0	0	0	0	0	0	0	0	0	0	0	0	0	0	0	0	0	0.000235128	0	2.83238e-05	3.82687e-05	3.92989e-05	0	0	0	0	8.53558e-05	0	0	0	0	0	0	0	0	0	0	0	0
Otu0418	Staphylococcus	0	0.000119546	0	0	0	0	0	0	0	0	2.8767e-05	0	0	0	0	0	0	0	0	5.12308e-05	0	0	0	0	0	0	0	0	0	0	0	0	0	0	0	0	0	0	0	0	0	0	0	0	0	0	0	0
Otu0419	Unclassified Bacteria	0.000169119	0.000119546	0	0	0.000449135	0.000165536	0.000359066	0	0	0.00110919	0	0.000117429	0	0.000903576	5.06997e-05	0	0	0	0	0	0	0	0	7.95862e-05	0	0	0	0	0	0	0	0	0	0	0	0	0	0	0	0	0	0	0	0	0	0	0	0
Otu0420	Sphingopyxis	0	0	0	0	0	0	0	0	0	0	0	0	0	0	0	0	0	0	0	0	0	0	0	0	0	0	0	0	5.66476e-05	3.82687e-05	0	0	0	0	6.71141e-05	0	0	0	0	0	0	0	0	0	0.000141363	3.51704e-05	0	0
Otu0421	Unclassified Bacteria	0	0	0	0	0	0	0.0002693	0.000119868	0	0	0	0	9.081e-05	0	0	4.64016e-05	0	0	0	0	0	0	0	0	0	0	0	0	0	0	0	0	0	0	0	0	0	3.1346e-05	0	0.00016034	0	0	0	0	0	0	0	0
Otu0422	Hydrogenophaga	0	0	0	0	0	0	0	0	0	0	0	0	0.00012108	0	5.06997e-05	0	7.75134e-05	0	0	0	0	8.22064e-05	0	0	0	0	0	0	0	0	0	0	0	0	0	0	0	0	0	0	0	0	0	0	0	0	0	0
Otu0423	Unclassified Rhizobiales	0	0	0.000117862	0	0	0	0	0	0	0	0	0	0	0	0	0	0	0	0	0	0	0	0	0	0	0	0	0	0	0	0	0	0	0	6.71141e-05	0	0	0	0	0.000120255	0	0	0	0	0	0	0	0
Otu0424	Thiomonas	0.000338238	0	0.000353586	0.000132328	0	0	0.000179533	0.000149835	0	0	0	0	0	0	0.000101399	4.64016e-05	0	0	0	0	2.77917e-05	0	0	0	0	0	0	0	0	0.000114806	0	0	0	8.65551e-05	0	0	0	0	0	0	0	0	0	0	0	0	0	0
Otu0425	Unclassified Oxalobacteraceae	0	0	0	0	0	0	0	8.99011e-05	0	0	0	0	0	0	0	0	0	0	0	0	0	0	0	0	0	0	0	0	0	0	0	0	0	0	0	0	0	0	0	0	0	0	0	0	0	0	0	0
Otu0426	Unclassified Gammaproteobacteria	0	0	5.8931e-05	0	0	5.51785e-05	0	2.9967e-05	0	0	0	0	0	0	0	0	0	0	0	0	0	0	0	7.95862e-05	0	0	0	0	0	0	0	0	0	0	3.3557e-05	0	0	0	3.03582e-05	0	3.86421e-05	0	4.35398e-05	0	0	0	0	0
Otu0427	Unclassified Planctomycetaceae	0.000422797	5.97729e-05	0.000235724	0	0	5.51785e-05	8.97666e-05	0.000149835	0.000142315	0	2.8767e-05	8.80721e-05	0	0	5.06997e-05	0	0	0.000129078	0	0	0	0.000328826	0	0	0	0	0	0	0.000141619	0	7.85978e-05	0.000532009	0	0	0	0	0	0	0	0	0	0	0	0	0	0	0	0
Otu0428	Bdellovibrio	0.00101471	0	0.00147327	0.000463147	0.000449135	0.000275893	0.0002693	0.000479473	0.000711575	0	0.000373972	0	0.0009081	4.30274e-05	0.000152099	0.000185606	0.000155027	0.000161348	0	2.56154e-05	0.000111167	8.22064e-05	0	0.000238758	0.000116686	0	0.000146955	0	0.000339886	0.000880181	0.000196495	0	0	0	0	0	0	0	0	0	0	0	0	0	0	0	0	0
Otu0429	Bdellovibrio	0	0	0	0	0	0	0	0	0	0	2.8767e-05	0.000117429	0	0	0	0	0	0	0	0	5.55833e-05	0	0	0	0	0	0	2.83567e-05	0	0	0	0	3.09607e-05	0	0	0	0	0	0	0	0	0	0	0	0	0	0	0
Otu0430	Unclassified Deltaproteobacteria	0	0	0	0	0	0	0	0	0	0	5.75341e-05	0	0	0	5.06997e-05	0	0	0	2.79979e-05	0	0	0	0	0	0	0	5.8782e-05	0	0	0	3.92989e-05	0	0	0	0	0	0	0	0	0	0	0	0	0	0	0	0	0
Otu0431	Unclassified Planctomycetaceae	0	0	5.8931e-05	0	0	0	0	0	0	0	0.000115068	0.000234859	0	0	0.000304198	4.64016e-05	0.000310053	0	0	0	0	8.22064e-05	0	0	0	0	0	0	5.66476e-05	0.000229612	0	0	0	0	0	0	0	0	3.03582e-05	0	3.86421e-05	2.5503e-05	8.70796e-05	0	0	0	0	0
Otu0432	OD1_genus_incertae_sedis	8.45594e-05	0.000119546	0.000412517	6.61638e-05	0.000112284	0	0	2.9967e-05	0.000189753	0	0.000258903	2.93574e-05	0	0	0.000152099	4.64016e-05	7.75134e-05	0.000129078	0.00221183	0.000230539	0	0.000205516	4.02156e-05	3.97931e-05	0	0	0	0	0.00022659	0	0	0	0	0	0	0	0	0	0	0	0	0	0	0	0	0	0	0
Otu0433	Mycobacterium	0	0	0.000176793	0	0	5.51785e-05	8.97666e-05	2.9967e-05	0	0	0	0	0	0	0	0	0	0	0	0	0	0	0	0	0	0	0	0	0	0	0	0	0	0	0	0	0	0	0	0	0	0	0	0	0	0	0	0
Otu0434	Gemmatimonas	0	0	0	0	0	5.51785e-05	0	0	0	0	0	0.000146787	3.027e-05	0	0	0	0	0	0	0	8.3375e-05	0	0	3.97931e-05	0	0	0	0	0	0	0	0	0	0	0	0	0	0	6.07165e-05	0	1.93211e-05	0	2.17699e-05	0	0	0	0	0
Otu0435	Unclassified Gammaproteobacteria	0.00143751	0.00113568	0.000294655	6.61638e-05	0.00224568	0.000496607	0.0002693	0.000239736	0.00128083	0.000782958	0.000402739	0.000146787	0	0	0	0	3.87567e-05	0.000161348	0	0.00028177	0.000111167	0.000328826	0	0.000318345	0	0	0	0.000113427	0.000169943	0.000114806	0.000392989	0	0	0.000288517	0.000234899	0.000426779	0.000547945	0.000219422	0.000242866	0.00032068	0.00017389	0.000229527	0.000522477	0	9.42418e-05	0	0	0
Otu0436	Gemmatimonas	0	0	0	0	0	0	0	8.99011e-05	0.000142315	6.52465e-05	0.000201369	0	0	0	0.000152099	0	0	6.4539e-05	0	5.12308e-05	2.77917e-05	4.11032e-05	0	0	0.000320887	0	0	0	0	0	0	0	0	0	0	0	0	0	0	0	0	0	0	0	0	0	0	0
Otu0437	Sphingopyxis	0	0	0	0	0	0	0	0	0	0	5.75341e-05	0	0	0	0	0	0.00011627	0	0.000111991	0	0	0	4.02156e-05	0	0	0	0	0	0	0	0	0	0	0	0	0	0	0	0	0	0	0	0	0	0	0	0	0
Otu0438	Unclassified Gammaproteobacteria	0	0	0.000117862	0.000132328	0	0.000110357	0.000628366	0	9.48767e-05	0	0	0	0	0	0	0	0	0	0	0	0	0	0	0	0	0	0	0	0	0	0	0	0	2.88517e-05	0	5.69039e-05	0	9.4038e-05	0	8.017e-05	3.86421e-05	7.65091e-05	6.53097e-05	0	9.42418e-05	0	0	0
Otu0439	Unclassified Myxococcales	0	0	0.000176793	0	0	0.000165536	0	8.99011e-05	0	0	0	0	0	0	0	0	0	0	2.79979e-05	0	2.77917e-05	0	0	0	0.000116686	0	0	0	0	0	0	0	0	0	0	0	0	0	0	0	0	0	0	0	0	0	0	0
Otu0440	Unclassified Bacteroidetes	0	0	5.8931e-05	0	0	0	0	0	0.000332068	0.00215313	0	8.80721e-05	3.027e-05	0	5.06997e-05	0	3.87567e-05	0	0	0	0	4.11032e-05	0	0	0	0	0	0	2.83238e-05	0	0	0	0	0	0	0	0	0	0	0	0	0	0	0	0	0	0	0
Otu0441	Unclassified Bacteria	0	0	5.8931e-05	0	0	0	0	2.9967e-05	4.74383e-05	9.78697e-05	0	0	0	0	0	0	0	0	0	0	0	0	0	0	0	0	0	0	2.83238e-05	0	0	0	0	0	0	0	0	0	0	0	0	0	0	0	0	0	0	0
Otu0442	Unclassified Betaproteobacteria	0	0	0	0	0	0	0	0	0	0	0	0	0	0	0	4.64016e-05	0	0	0	0	0	0	0	0	0	0	0	0	0	0	0	0	0	0	0	0	3.42466e-05	0	6.07165e-05	0	0	0	0	0	0	0	0	0
Otu0443	Bauldia	0	0	5.8931e-05	0	0.000785987	5.51785e-05	0	5.99341e-05	0	0	8.63011e-05	0	0	0	0	4.64016e-05	0	0	0	0	0	0	0	0	0	0	0	5.67135e-05	0	0	0	0	0	0	0	0	0	0	0	0	0	0	6.53097e-05	0	0	0	0	0
Otu0444	Unclassified Bacteria	0	0.00041841	0.000353586	0	0	5.51785e-05	8.97666e-05	0.000359604	0.000189753	6.52465e-05	8.63011e-05	0.000117429	0.00018162	0	0.000101399	0	0	0	0	0.000102462	0	0	0.000120647	0	0	0	0	2.83567e-05	2.83238e-05	0	7.85978e-05	0	0	0	0	0	0	0	0	0	0	0	0	0	0	0	0	0
Otu0445	Neisseria	0	0	5.8931e-05	0	0	0	0	0	0	0	0	0	0	0	0	0	0	0	0	0	0	0	0	0	0	0	0	0	0	0	0	0	0	0	0	0	0	6.2692e-05	0	0	0	0	0	0	0	0	0	0
Otu0446	Unclassified Bacteria	0	0	0	0	0	0	0	0	0	0	0	0	0	0	0	4.64016e-05	0	0	0	0	0	0	0	0	2.91715e-05	0	0	0	0	0	0	0	6.19214e-05	0	0	0	0	0	0	0	0	0	0	0	0	3.51704e-05	0	0
Otu0447	Pedomicrobium	0	0	0	0	0	0	0	0	0	0.000293609	0	0	0.00012108	0	0	0	7.75134e-05	0	0.000951928	0	0.000138958	8.22064e-05	4.02156e-05	0.000278552	0	0	0	0	0	0	0	0	0	5.77034e-05	6.71141e-05	0	0	3.1346e-05	0	4.0085e-05	0	5.10061e-05	2.17699e-05	0	0	0.000351704	0	0
Otu0448	Unclassified Bacteroidetes	0	0	0.000176793	0.000396983	0	0.000110357	0.000448833	0	0.000521822	0	0	0	0	0	0	0	0	0	0	0	5.55833e-05	0	0	0	0	0	0	0	0	0	0	0	0	0	0	0	0	0	0	0	0	0	0	0	0	0	0	0
Otu0449	Unclassified Deltaproteobacteria	0	0	5.8931e-05	0	0.000224568	0	0	0	0	9.78697e-05	5.75341e-05	0	0	0	0	0	0	0	0	0	0	0	0	0	0	0	0	0	0	0.000420956	0	0	0	0	0	0	0	0	0	0	0	0	0	0	0	0	0	0
Otu0450	Unclassified Planctomycetaceae	0	0	0.000117862	0	0	0	0.0002693	0	0	0	0	0	0	0	0.000152099	0	0	0	0	0	2.77917e-05	4.11032e-05	0	0	0	0	0	0	0	0.000191344	0	0	0	0	0	8.53558e-05	0	0	0	4.0085e-05	3.86421e-05	0	0	0	0	0	0	0
Otu0451	Acinetobacter	0	0	0.000412517	0	0	0	0	0	0	0	0	0	0	0	0	0	0	3.22695e-05	0	0	0	4.11032e-05	0	0	0	0	0.000146955	0	0	0	0	0	0	0	0	0	0	0.000125384	0	0	0	0	0	0	0	0	0	0
Otu0452	Unclassified Acetobacteraceae	0.000169119	0	0.000530379	0	0.000673703	5.51785e-05	8.97666e-05	0.000149835	0.000189753	0	0	0	0	8.60548e-05	0	0	0	0	0	0	0	0	0	0	0	0	0	0	2.83238e-05	0	0.000117897	0	0	0	0	0	0	0	0	0	0	0	0	0	0	0	0	0
Otu0453	Unclassified Bacteria	0.00101471	0.000298864	0.000825034	0.000661638	0.000785987	0.000441428	0.000987433	0.00101888	0.00028463	0	0	0.000264216	0	0.000129082	5.06997e-05	0	0	0	0	0	0	0	0.000160862	0.000159172	0	0.000125329	2.9391e-05	0	5.66476e-05	0	0	0	0	0	0	0	6.84932e-05	0	0	0	5.79632e-05	5.10061e-05	0	0	0	0	0	0
Otu0454	Fluviicola	0	0	0	0.000396983	0	0	0	8.99011e-05	0.000189753	0.000293609	0.000316437	0	0	0	0.000101399	4.64016e-05	0	0	0	0.000307385	0	0	8.04311e-05	0	0	0	0.000382083	0.000283567	0	0	0	0	0	0	0	0	0	0	0	0	0	0	0	0	0	0	0	0
Otu0455	Unclassified Gammaproteobacteria	0	5.97729e-05	0	0.000463147	0.000673703	0.000331071	0.000179533	0.000179802	9.48767e-05	0	0	0	0	0	0.000202799	0	0	0	0	0	8.3375e-05	0	0	0	0	0	0	0	0	0	0	0	0	0	0	2.84519e-05	0.000136986	0	0	0	3.86421e-05	2.5503e-05	0	0	0	0	0	0
Otu0456	Unclassified Phyllobacteriaceae	0.00101471	0	5.8931e-05	0.000264655	0	0	0.000179533	2.9967e-05	0.000332068	0	0	0	0	0	0	0	0	3.22695e-05	0	0	0	8.22064e-05	0	3.97931e-05	0	0	0	0	0	0	0	0	3.09607e-05	0	0	0	0	0	0	0	3.86421e-05	0	0	0	0	0	0	0
Otu0457	Veillonella	0	0	0	0	0	0	0	0	0	0	0	0	0	0	0	0	0	0	0	0	0	0	0	0	0	0	0	0	0	0	0	0	0	0	6.71141e-05	0	0	0	0	0	0	2.5503e-05	0	0	0	0	0	0
Otu0458	Bdellovibrio	0	0	0.000117862	0	0	0	8.97666e-05	0	0	0	2.8767e-05	5.87147e-05	0	0	0	0	0	0	0	0	0	0	0	0	0	0	0	0	0	0	0	0	0	0	0	0	0	0	0	0	0	0	0	0	0	0	0	0
Otu0459	Unclassified Burkholderiales	0	0	0	0	0	0	0	0	0	3.26232e-05	0	0	0	0	0	0	0	0	0	0	0	0	4.02156e-05	7.95862e-05	0	9.39967e-05	0	2.83567e-05	0	0	0	0	0	0	0	0	0	0	9.10747e-05	0	0	0	0	0	0	0	0	0
Otu0460	Gp1	0	0	0	0	0	0	0	0	0	0	0	0	0	0	0	0	0	0	0	0	0	0	0	0	0	0	0	0	0	0	0	0	0	0	0	0	0	0	0	0	0	0	0	0	0	0	0	0
Otu0461	Unclassified Planctomycetaceae	0	0	0.000117862	0	0.000224568	0	0	2.9967e-05	4.74383e-05	0	0	0	0	0	5.06997e-05	0	0	0.000161348	0	0	0	0	4.02156e-05	0.000198965	0	0	0	0.000141784	0.000339886	0	0	0	0	5.77034e-05	0.000302013	0.000113808	0.000342466	0	3.03582e-05	0	5.79632e-05	2.5503e-05	0	0	0	0	0	0
Otu0462	Unclassified Sphingobacteriales	0.000591916	0.000358637	0.000707172	0.000330819	0	0	0.00125673	0.000269703	0.000189753	3.26232e-05	0	0.000440361	0.00021189	0	0.000152099	4.64016e-05	0.000193783	0	0	5.12308e-05	2.77917e-05	0.000246619	0	0	0	0	0.000176346	0	0	0	0	0	0	0	0	0	0	0	0	0	0	0	0	0	0	0	0	0
Otu0463	Spartobacteria_genera_incertae_sedis	0	0	0	0	0	0	0	0	0	0	0	0	0	0	0	0	0	0	0	0	0	0	0	0	0	0	0	0	0	0	0	0	0	0	0	0	0	0	0	0	0	0	0	0	0	0	0	0
Otu0464	Unclassified Bacteria	0	0	0	0	0	5.51785e-05	0	0.00029967	0	0	0	0	0	0	0	4.64016e-05	0.00011627	0	0	0	0	0	0	7.95862e-05	0	0	0	0	0	0	0	0	0	0	0	0	0	0	0	0	0	0	0	0	0	0	0	0
Otu0465	Unclassified Bacteria	0	0	0	0	0	0.000110357	0	2.9967e-05	0	0	0	0	6.054e-05	0	0	0	3.87567e-05	0	0	0	0	0	0	0.000159172	0	0	5.8782e-05	0	0	0	0	0	0	2.88517e-05	0	0	3.42466e-05	0	0	0	0	0	0	0	0	0	0	0
Otu0466	Unclassified Burkholderiales	0	0	0	0	0	0	0	0	0	0	0	0	0	0	0	0	0	0	0	0	0	0	0	0	0	0	0	0	0	0	0	0	0	0	0	0	0.00010274	0	0	0	0	0	2.17699e-05	0	0	0	0	8.50509e-05
Otu0467	Unclassified Betaproteobacteria	0	0	0	0.000529311	0	0	0	0	0	0	0	0	0	0	0	0	0	0	0	0	0	0	0	0	8.75146e-05	0	0	0	0	0	0	0	0	0	0	0	0	0	0	0	0	0	0	0	0	0	0	0
Otu0468	Unclassified Bacteria	0.000169119	5.97729e-05	0.000294655	0	0	5.51785e-05	0	0.00050944	0	0	0.000258903	0	0.00021189	0.00017211	0	0	0	0	0	0	0	0	0	0	0	0	0	0	0	0	0	0	0	0	0	0	3.42466e-05	0	0	0	0	0	0	0	0	0	0	0
Otu0469	OD1_genus_incertae_sedis	8.45594e-05	0	0	0	0.000112284	0	0	2.9967e-05	4.74383e-05	0	0	0	0	0	0	0	0	0	0	0	0	0	0	0	0	0	0	0	0	3.82687e-05	0	0	0	0	0	0	0	0	0	0	0	0	0	0	0	0	0	0
Otu0470	Unclassified Bacteria	0	0	0.000412517	0	0	0	0	0.000149835	4.74383e-05	0	0	0.000117429	0	0	0.000101399	9.28031e-05	0	0	0	0	0	8.22064e-05	0	7.95862e-05	0	0	0	0	2.83238e-05	0	0	0	0	0	0	0	0	0	0	0	0	0	0	0	0	0	0	0
Otu0471	Unclassified Gammaproteobacteria	0	0.000119546	0.000117862	0.000793966	0	0.000165536	0.000718133	0.000329637	0.000142315	0	0	0	0	0	0	0	0	0	0	0	0	0	0	0	0	0	0	0	0	0	0	0	0	0	3.3557e-05	0.00014226	6.84932e-05	3.1346e-05	0	0	0	0	6.53097e-05	0	0	0	0	0
Otu0472	Unclassified Bacteria	0	0	0	0	0	0	0	0	0	0	0	0	0	0.00017211	0	9.28031e-05	3.87567e-05	0	0	2.56154e-05	0	0	0	0	0	0	0	0	0	0	0	0	0	0	0	0	0	0	0	0	0	0	6.53097e-05	0	0	0	0	0
Otu0473	Gp1	0	0	0	0	0	0	0	0	0	0	0	0	0	0	0	0	0	0	0	0	0	0	0	0	0	0	0	0	0	0	0	0	0	0	0	0	0	0	0	0	0	0	0	0	0	0	0	0
Otu0474	Spartobacteria_genera_incertae_sedis	0	0	0	0	0	0	0	0	0	0	0	0	0	0	0	0	0	0	0	0	0	0	0	0	0	0	0	0	0	0	0	0	0	0	0	0	0	0	0	0	0	0	0	0	0	0	0	0
Otu0475	Unclassified Betaproteobacteria	0	0	0	0	0	0	0	0	0	0	0	0	0	0	0	0	0	3.22695e-05	0	0	2.77917e-05	0	0	0	0	0	0	0	0	0	0	0	0	5.77034e-05	0	0	6.84932e-05	6.2692e-05	0	0	0	0	0	0	0	0	0	0
Otu0476	3_genus_incertae_sedis	0	0	0	0	0	0	0	0	0	0	0	0	0	0	0	0	0	0	0	2.56154e-05	0	0	0	0	0	0	0	0	0	0	0	0	0	0	0	0	0	0	0	0	0	0	0	0	0	0	0	0
Otu0477	Gp1	0	0	0	0	0	0	0	0	0	0	0	0	0	0	0	0	0	0	0	0	0	0	0	0	0	0	0	0	0	0	0	0	0	0	0	0	0	0	0	0	0	0	0	0	0	0	0	0
Otu0478	Unclassified Actinomycetales	0	0	0	0	0	0	0	0	0	0	0	0	0	0	0	0	0	0	0	0	0	0	0	0	0	0	0	0	0	0	0	0	0	0	0	0	0	0	0	0	0	0	0	0	0	0	0	0
Otu0479	Unclassified Bacteria	0	0	0	0	0	0	0	0	0	0	8.63011e-05	2.93574e-05	0	0.00374338	0.00167309	0.00139205	0.00189908	0.00138759	0.00251981	0.00148569	0.00136179	0.00110979	0.00160862	0.000437724	0.00131272	0	0	0	0	0.000114806	0	0	0	0	0	0	0	0	0	0	0	0	0	0	0	0	0	0
Otu0480	Unclassified Betaproteobacteria	0	5.97729e-05	0	0	0	0.000110357	0	0	0	0	0	0	0	0	0	0	0	0	0	0	0	0	0	0	5.83431e-05	0	0	0	8.49714e-05	0	0	0	0	0	0	0	0	0	0	0	0	0	2.17699e-05	0	0	0	0	0
Otu0481	Unclassified Bacteroidetes	0	5.97729e-05	0.000117862	0	0	0.000110357	0	0.000209769	0	0	0	8.80721e-05	0	0	0	0	0	0	0	0	0	0	0	0	0	0	0	2.83567e-05	0	0	0	0	0	0	0	0	0	0	0	0	0	0	0	0	0	0	0	0
Otu0482	Unclassified Bacteria	0	0	0	0	0	0	0	0	0	0	0	0	0	0	0	0	0	0	0	0	0	0	4.02156e-05	0	0	0	0	0	0	0	0	0	0	0	0	0	0	0	0	0	3.86421e-05	0	0	3.47017e-05	0	0	0	2.83503e-05
Otu0483	Peptostreptococcus	0	0	0	0	0	0	0	0	0	0	0	0	0	0	0	4.64016e-05	0	0	0	0	0	0	0	3.97931e-05	0	0	0	0	0	3.82687e-05	0	0	3.09607e-05	0	0	0	0	0	3.03582e-05	0	0	0	0	0	0	0	0	0
Otu0484	Gp3	0	0.000119546	0.000117862	0	0	0	0	2.9967e-05	0	0	0	0	0	0	5.06997e-05	0	0	0	0	0	2.77917e-05	0	0	0	0	0	0	0	0	0	0	0	0	0	0	0	0	0	0	0	0	0	0	0	0	0	0	0
Otu0485	Unclassified Comamonadaceae	0	0	0	0	0	0	0	0	0	0	0	0	0	0	0	0	0	0	0	0	0	0	0	0	0	0	8.81731e-05	2.83567e-05	0.000113295	0	0	0	0	0	0	0	0	0	0	0	0	0	0	0	0	0	0	0
Otu0486	Leptolinea	0	0	0.000176793	0	0	0	0	8.99011e-05	0	0	8.63011e-05	0	0	0	0.000101399	0	0	0	0	0	0	0	0	0.000119379	0	0	0	0	0	0	0	0	0	0	0	0	0	0	0	0	0	0	0	0	0	0	0	0
Otu0487	Unclassified Bacteria	0.00219855	0.00041841	0.000825034	0.000529311	0	0	0.000807899	0.00125862	0.00113852	0.000195739	0.00048904	0.000293574	0.00039351	0.000215137	0.000456297	0.000278409	0.00023254	0	0	0	0.000222333	0.000205516	0.000120647	0.000238758	0.000933489	0.000375987	0.000264519	5.67135e-05	0	0.000765374	3.92989e-05	0	0	8.65551e-05	0	0	0	0	0	0	0	0	0	0	0	0	0	0
Otu0488	Unclassified Acetobacteraceae	0	0	0	0	0	0	0	0	0	0	0	0	0	0	0	0	0	0	0	0	0	0	0	0	0	0	0	0	0	0	0	0	0	0	0	0	0	0	0	0	0	0	0	0	0	0	0	0
Otu0489	Unclassified Bacteroidetes	0	0	0	0	0	0	0.000179533	0	0	0.000489349	2.8767e-05	0	0	0	0	0	0	0	0	0	5.55833e-05	0	0	0	0	0	0	0	0	0	0	0	0	0	0	0	0	0	0	0	0	0	0	0	0	0	0	0
Otu0490	Unclassified Comamonadaceae	0	0	0	0	0	0	0	0	0	0	0	0	0	0	0	0	0	0	0	0	0	0	0	0	0	0	0	0	0	0	0	0	0	0	0	0	0	0	6.07165e-05	0	0	0	2.17699e-05	0	0	0.000105511	0	0
Otu0491	Unclassified Betaproteobacteria	0	0	0	0	0	0	0	0	0	0	0	0	3.027e-05	0	0	0	0	0	0	0	0	0	0	0	0	0	2.9391e-05	5.67135e-05	2.83238e-05	0	0	0	0	0	0	0	0	0	0	0	0	0	0	0	0	0	0	0
Otu0492	Unclassified Parachlamydiaceae	0	0	0.000117862	0	0	0.000110357	0	0	0	0	0	0	3.027e-05	0	0	0	0	0	0	0	0	0	0	0	0	0	0	0	0	0	0.000157196	0	0	0	0	0	0	0	0	0	0	0	0	0	0	0	0	0
Otu0493	Unclassified Bacteria	0	5.97729e-05	0.000235724	0.000330819	0	5.51785e-05	0	0	0	0	0	0	0.00024216	0	0	0	0	0	0	0	2.77917e-05	0	0.000120647	0	0	0	0	0	8.49714e-05	0	0	0	0.000216725	0	0	0	0	0	0	0	0	0	0	0	0	0	0	0
Otu0494	Unclassified Bacteria	0	0	0	0	0	0	0	0	0	0	0	0	0	0	5.06997e-05	9.28031e-05	0.00011627	0	0.00235182	0	0	0	0	0	0	0	0	0	0	0	0	0	0	0	0	5.69039e-05	0	0	0	0	0	0	0	0	0	0	0	0
Otu0495	Unclassified Bacteria	0	0.000179319	0.000117862	0	0	0	8.97666e-05	0	4.74383e-05	0	0.000143835	0	0	8.60548e-05	5.06997e-05	0	0	0	0	0	2.77917e-05	0	0	0	0	0	0	0	0	0	0	0	0	0	0	0	0	0	0	0	0	0	0	0	0	0	0	0
Otu0496	Unclassified Brucellaceae	0	0	0	0	0	0	0	0	0	0	0	5.87147e-05	0	0	0	0	0	0	0	2.56154e-05	0	0	0	0	0	0	0	5.67135e-05	2.83238e-05	0	0	0	0	0	0	0	0	0	0	0	0	0	0	0	0	0	0	0
Otu0497	Unclassified Proteobacteria	0	5.97729e-05	0.000353586	0	0.000112284	0	0.000359066	0.000149835	0	0	0.000345205	0	0	0	0	0.000139205	0	0	0	0	0	8.22064e-05	0	0	0	0	0	0	0	0.000191344	0.000157196	0	0	0	0	0	0	0	0	0	0	0	0	0	0	0	0	0
Otu0498	Gp1	0	0	0	0	0	0	0	0	0	0	0	0	0	0	0	0	0	0	0	0	0	0	0	0	0	0	0	0	0	0	0	0	0	0	0	0	0	0	0	0	0	0	0	0	0	0	0	0
Otu0499	Sphingomonas	0	0	0	0	0	0	0	0	0	0	0	0	0	0	0	0	0	0	2.79979e-05	0	2.77917e-05	0	8.04311e-05	0	0	0	0	0	2.83238e-05	0	0	0	0	0	0	0	0	0	0	0	0	0	0	0	0	0	0	0
Otu0500	Gp1	0	0	0	0	0	0	0	0	0	0	0	0	0	0	0	0	0	0	0	0	0	0	0	0	0	0	0	0	0	0	0	0	0	0	0	0	0	0	0	0	0	0	0	0	0	0	0	0
Otu0501	Unclassified Bacteria	0	0	0.000176793	0	0	0	0	0	0	0	0	0	0	0	0	0	0	0	0	0	0	0	0	0	0	0	0	0	0	0	0	0	0	0	0	5.69039e-05	0	0	0	0	0	0	0	0	0	0	0	0
Otu0502	Gemmatimonas	0	0	0.000176793	0	0	0	0	0	0	0	0	0	0	0.000344219	0	0	0	0	0	0	0	0	8.04311e-05	0	0	0	0	0	0	0	0	0	0	0	0	0	0	0	0	0	0	0	0	0	0	0	0	0
Otu0503	Unclassified Gammaproteobacteria	0	0.000537956	0.000294655	0	0	5.51785e-05	0	0	0	0	0	0.000117429	0	0	0	0	0	0	0.000307977	0	5.55833e-05	0.000164413	8.04311e-05	0	0	0	0	0	0	0.00030615	0	0	0	0	0	0	6.84932e-05	0	0	0	0	0	0	0	0	0	0	0
Otu0504	Unclassified Bacteria	0	5.97729e-05	0	0.000661638	0.000112284	0	0	0.000209769	4.74383e-05	0	5.75341e-05	0.000264216	0	4.30274e-05	0.000101399	0.000139205	0	6.4539e-05	0	7.68462e-05	2.77917e-05	8.22064e-05	0	0	0	0	0	8.50702e-05	0.000169943	0	0.000117897	0	0	0	0	0	0	0	3.03582e-05	0	0	0	0	0	0	0	0	0
Otu0505	Bdellovibrio	0	0	5.8931e-05	0	0	0	0	0.000119868	0	0	0	0	0	0	0.000101399	0	0	3.22695e-05	0	2.56154e-05	5.55833e-05	0	0.000201078	3.97931e-05	0	0	0	0	0	0	0	0	0	0	0	0	0	0	0	0	0	0	0	0	0	0	0	0
Otu0506	Pasteuria	0	0	0	0	0.000112284	0.000331071	0	0	0	0	0	5.87147e-05	0	0	0	9.28031e-05	0	0	0	0	5.55833e-05	4.11032e-05	0	0	0	0	0.000146955	0	0	0.000267881	0	0	0.000743057	0	0	0	3.42466e-05	0	0	0	0	0	0	0.000104105	0	0	0	0
Otu0507	Unclassified Bacteria	0	0	0.000176793	0	0	0	0.000179533	0	0	0	0	0	0	0	0	0	0	0	0	0.000102462	0	0	0	0	0	0	0	0	0	0	0	0	0	0	0	0	0	0	0	8.017e-05	0	0	0	0	0	0	0	0
Otu0508	Unclassified Chitinophagaceae	0	0	0	0	0	0	0	0	0	0	5.75341e-05	0	0.00036324	4.30274e-05	0	4.64016e-05	0.000155027	0	0	5.12308e-05	0	0	0.000120647	0	0.000145858	0	0	0	0	0	0	0	0	0	6.71141e-05	0	0	0	0	0	0.000231853	0	0	0	0	0	0	0
Otu0509	Unclassified Betaproteobacteria	0	0.000119546	0.000942896	0	0.000673703	5.51785e-05	0	0.000329637	0.000142315	0	0	0	3.027e-05	0	0	4.64016e-05	0	0	0	0	5.55833e-05	0	0	0	0	0	0.000146955	0	0	0	0	0	0	0	0	0	0	0	0	0	0	0	0	0	0	0	0	0
Otu0510	Aureispira	0	0	0	0	0	5.51785e-05	0	0.000149835	0	0	0	0	0	0	0	0	0	0	0	0	0	0	0.000281509	0	0	0	0	0	0	0	3.92989e-05	0	0	0	0	0	0	0	0	0	0	0	0	0	0	0	0	0
Otu0511	Unclassified Rhizobiales	0	5.97729e-05	5.8931e-05	0	0.000673703	0	8.97666e-05	0	0	0	0	0	0	0.00017211	0	0	0	0	0	0	8.3375e-05	4.11032e-05	0	0	0	0	0	0	0	0	3.92989e-05	0	0	0	0	0	3.42466e-05	0	0	0	0	0	0	0	0	0	0	0
Otu0512	Unclassified Anaerolineaceae	0	0.000119546	0	0	0	0	0	0.000119868	0	0	0.000172602	0	0	0.000430274	0	0	0	0.000129078	0	0	0.000194542	4.11032e-05	0	0.000119379	0	0	0	8.50702e-05	0	7.65374e-05	0	0	0	0	0	0	0	0	0	0	0	0	0	0	0	0	0	0
Otu0513	Planctomyces	0	0	0	0	0	0	0	0	0	0	0	0	0	0	0	0	0	0	0	0	0	0	0	0	0	0	0	0	0	0	0	0	0	0	0	0	0	0	0	0	0	0	0	0	0	0	0	0
Otu0514	Unclassified Gammaproteobacteria	0	0	0	0	0	0	0	0	0	0	0	0	0	0	0	0	0	0	0	0	0	0	0	0	0	0	0	0	0	0	0	0	0	0	0	0	0	0	0	0	0	0	0	0	0	0	0	0
Otu0515	Spartobacteria_genera_incertae_sedis	0	0	0	0	0	0	0	0	0	0	0	0	0	0	0	0	0	0	0	0	0	0	0	0	0	0	0	0	0	0	0	0	0	0	0	0	0	0	0	0	0	0	0	0	0	0	0	0
Otu0516	Unclassified Proteobacteria	0	0	0.000117862	0	0	0	0	2.9967e-05	0	0	0	0	0	0	5.06997e-05	0	0	0	0	0	0	8.22064e-05	0	0	0	0	0	0	0	0	0	0	0	0	0	0	0	0	0	0	0	0	0	0	0	0	0	0
Otu0517	Gp16	0.000338238	0	0.000412517	6.61638e-05	0.000224568	0	0	0	0	6.52465e-05	0.000172602	0.000176144	0.0003027	8.60548e-05	0.000202799	0	0.000155027	0.000193617	0.000979926	0.000204923	0.000305708	0.000287722	4.02156e-05	0.000159172	0	0.00056398	0.000146955	5.67135e-05	0	0.000497493	0.000157196	0	0	2.88517e-05	0	0	0	0	0	0	0	0	6.53097e-05	0	0	0	0	0
Otu0518	Unclassified Bacteria	0	5.97729e-05	0	0	0.00101055	0.000110357	8.97666e-05	0.000119868	0.00056926	0	0.000316437	0	0	0	0.000202799	0	0.00023254	0	0	0	0	0	0.000120647	0	0	0	0	0	0	0	0.000510886	0	0	0	0	0	0	0	0	0	0	0	0	0	0	0	0	0
Otu0519	Streptococcus	0	5.97729e-05	0.000117862	0	0	0	0.0002693	0	0	0	0	0	0	0	0	0	0	0	0	0	0	0	0	0	0	0	0	0	2.83238e-05	0	0	0	0	0	0	0	0	0	0	0	0	0	2.17699e-05	0	0	0	0	0
Otu0520	Lactococcus	0.000676476	0	0.000117862	0	0	0	0.000448833	0	4.74383e-05	0	0	0	0	0	0	0	0	0	0	0	0	0	0	0	0	0	0	0	0	0	0	0	0	0	0	0	6.84932e-05	0	0	4.0085e-05	1.93211e-05	0	0	0	0	0	0	0
Otu0521	Unclassified Myxococcales	0	5.97729e-05	0	0	0.000224568	0	0.000179533	0	0	0	2.8767e-05	0	0	0	0	0	0	0	0	0	0	0	0	0	0	0	0	0	0	0	0	0	0	0	0	0	0	0	0	0	0	0	0	0	0	0	0	0
Otu0522	Unclassified Planctomycetaceae	0	0.000119546	0.000117862	0	0.000112284	0.000220714	0.000179533	8.99011e-05	0.000759013	0	0.000115068	0	0	0	0	0.000139205	0	0	0	0	2.77917e-05	4.11032e-05	0.000241293	0.000119379	0.000350058	3.13322e-05	0	0	0.000651447	0	0	0	0	5.77034e-05	0	5.69039e-05	0	0	0	0	0	0	0	0	0	0	0	0
Otu0523	Gp3	0	0	0	0	0	0	0	0	0	0	0	0	0	0	0	0	0	0	0	0	0	0	0	0	0	0	0	0	0	0	0	0	0	0	0	0	0	0	0	0	0	0	0	0	0	0	0	0
Otu0524	Unclassified Bacteria	0.000169119	0	0.000176793	0	0	0	0	0	4.74383e-05	0	5.75341e-05	0	0.00015135	0.000129082	0	0.000139205	0	0	0	0	0	0	0	0	0	0	0	0	0	0	0	0	0	0	0	0	0	0	0	0	0	0	0	0	0	0	0	0
Otu0525	Unclassified Bacteroidetes	0	0	0	0	0	0	0	0	9.48767e-05	0	0	0	0	0.000129082	0	0	0	0	0	0	0	4.11032e-05	0	7.95862e-05	0	0	0	0	0	0	0	0	0	0	0	0	0	0	0	8.017e-05	0	5.10061e-05	6.53097e-05	0	0	0	0	0
Otu0526	Lactobacillus	0.000169119	0.000179319	0.000117862	0	0	0	0	0	0	0	0	0	0	0	0	0	0	0	0	0	0	0	0	0	0	0	0	0	0	0	0	0	0	0	0	0	0	0	0	0	0	0	0	0	0	0	0	0
Otu0527	Unclassified Bacteria	8.45594e-05	0	5.8931e-05	0.000330819	0	0.000275893	8.97666e-05	8.99011e-05	0	0	0	0	0	0	0	0	0	0	0	0	0	0	0	0	0	0	0	0	0	0	0	0	0	0	0	0	0	0	0	0	0	0	0	0	0	0	0	0
Otu0528	Unclassified Proteobacteria	0.000845594	0	0	0	0	0.000220714	0.000359066	0.000179802	4.74383e-05	0	0	0	0	0	5.06997e-05	0	0.00011627	0	0	0	0.000111167	8.22064e-05	0	0.000119379	0	0	0	0.000113427	0	0	0	0	3.09607e-05	0	0	0	0	0	0	0	0	0	0	0	0	0	0	0
Otu0529	Gp6	0	0	0.000294655	0.000198491	0	0	0	0	9.48767e-05	0	0	0.000176144	0	0.000344219	0	0.000185606	3.87567e-05	0	0	0.000179308	8.3375e-05	0	4.02156e-05	0	0	0	0	0	0	3.82687e-05	0	0	0	0	0	0	0	0	0	0	0	0	0	0	0	0	0	0
Otu0530	Unclassified Enterobacteriaceae	0.00202943	0	0.000117862	0.00125711	0.000561419	0	0	0	0.000142315	0	0	0	0	0	0	0	0	0	0	0	0	0	0	0	0	0.000125329	0	0	0	0	0	0.000118224	0	0	0	2.84519e-05	0	0	0	0	1.93211e-05	0	0	0	0	0	0	0
Otu0531	OD1_genus_incertae_sedis	8.45594e-05	0	0	0	0	0	0.000448833	0.000149835	0.000237192	0	5.75341e-05	0	0	0.00017211	0	0.000185606	0.00011627	0	0	0	0	0	0	0	0	0	0.000176346	0	0	0	0	0	0	0	0	0	0	0	0	0	0	0	0	0	0	0	0	0
Otu0532	Chondromyces	0	0	0	0	0	0	0	0	0.000142315	0	0	2.93574e-05	0	0	0.000101399	0	7.75134e-05	0	0	0	0	0	0	0.000119379	0	0	0	0	0	0	0	0	0	0	0	0	0	0	0	0	0	0	0	0	0	0	0	0
Otu0533	Unclassified Bacteroidetes	0.000676476	0.000358637	0.000117862	0	0	5.51785e-05	0.0002693	0.000239736	0	0	0	0.000264216	0	0	5.06997e-05	4.64016e-05	7.75134e-05	0	0.000363972	5.12308e-05	8.3375e-05	4.11032e-05	0.000281509	0.000119379	0	0	0	0	0	0.000114806	0.000235793	0	0	0	0	0	0	0	0	0	0	0	0	0	0	0	0	0
Otu0534	Unclassified Rhodocyclaceae	0	0	0	0	0	0	0	0	0	0	0	0	0	0	0	0	0	0	0	0	0	0	0	0	0	0	0	0	0	0.000153075	0	0	0	0	0	0	0	3.1346e-05	0	0	0	0	6.53097e-05	0	0	0	0	0
Otu0535	Unclassified Nitrosomonadaceae	0	0	0	0	0	0	0	0	0	0	0	0	0	0	0	9.28031e-05	0	3.22695e-05	0	0	0	0	0	0	2.91715e-05	0	0	0	0	0	0	0	0	0	0	0	0	6.2692e-05	0	0	0	0	0	0	0	0	0	0
Otu0536	Ignavibacterium	0	0	5.8931e-05	0	0	0	0.0002693	5.99341e-05	0	0	2.8767e-05	0	0	0	0	0	0	6.4539e-05	0	5.12308e-05	0	0	0	0	0	0	5.8782e-05	0	2.83238e-05	0	0	0	0	5.77034e-05	0	0	0	0	3.03582e-05	0.000120255	3.86421e-05	0	4.35398e-05	0	0	0	0.000408723	0
Otu0537	Unclassified Burkholderiales	0	0	0	0	0	0	0	0	0	0	5.75341e-05	0	0	0	0	0	0	0	0	0	2.77917e-05	0	0	0	0	0	5.8782e-05	0	0	0	0	0	0	0	0	0	0	0	0	0	0	0	0	0	0	0	0	0
Otu0538	Unclassified Alphaproteobacteria	0	0	0	0	0	0	0	0	0	0	0	0	0	0	5.06997e-05	0	0	0	0	0	0	0	8.04311e-05	0	0	0	2.9391e-05	0	0	0	0	0	0	0	0	0	0	0	0	0	0	0	0	0	0	0	0	0
Otu0539	Unclassified Proteobacteria	0	0.000239091	0.000707172	0.000330819	0.000785987	0.000220714	0	0.000659275	0	0	5.75341e-05	0.000293574	0.00045405	0	0.000101399	0.000232008	0	0	0	0	2.77917e-05	0.000164413	0	0	0	0	0	0	0.000113295	0.000650568	0	0	0	0	0	0	0	0	0	0	1.93211e-05	0	4.35398e-05	0	0	0	0	0
Otu0540	Bryobacter	0	0	0	0	0	0	0	0.000149835	0	0	0	0.000264216	0.00048432	0.000129082	0	4.64016e-05	0	0	0	0	0	0	0	0	0	0	0	5.67135e-05	0	0	0	0	0	0	0	0	0	0	0	0	0	0	0	0	0	0	0	0
Otu0541	Unclassified Betaproteobacteria	0	0	0	0	0	0	0	0	0	0	0	0	0	0	0	0	0	0	0	0	0	0	0	0	0	0	0	0	0	0	0	0	0	0	0	0	0	0	9.10747e-05	0	0	0	0	0	0	0	0	0
Otu0542	OD1_genus_incertae_sedis	0	0.000119546	0	0	0	0	0	0.000119868	0	0	0	0	0	0	0	4.64016e-05	0	0	0	0	0	0	0	0	0	0	0.000382083	0	0	0	0	0	0	0	0	0	0	0	0	0	0	0	0	0	0	0	0	0
Otu0543	Unclassified Bacteria	0	0	0.000117862	0	0	0	0	2.9967e-05	0	0	0	0	0	0	0	0	3.87567e-05	0	0	0	0	0	0	0	0	0	0	0	0	0	0	2.95561e-05	0	0	0	0	0	0	0	0	0	0	0	0	0	0	0	0
Otu0544	Unclassified Bacteria	0.000422797	0.00041841	0.000176793	0	0	0.00038625	0.000448833	0.000449506	9.48767e-05	9.78697e-05	0.000115068	5.87147e-05	0.00018162	0	0.000152099	0	0.00011627	0	0	0	2.77917e-05	4.11032e-05	4.02156e-05	0.000119379	0	0	0	0.000255211	0	0	0	0	0.000154804	5.77034e-05	6.71141e-05	0.000113808	3.42466e-05	0	0	8.017e-05	0	0	0.000108849	0	0	0	0	0
Otu0545	Unclassified Rhizobiales	0.00143751	5.97729e-05	0.000176793	0	0	0	0	0.000239736	0.000426945	0	0	0	0	0	0.000152099	0	0	0	0	0	0	0	0	0	0	0	0	0	0	0	0	0	0	2.88517e-05	0	2.84519e-05	0.000136986	0	0	8.017e-05	0	0	2.17699e-05	0	0	0	0	0
Otu0546	Unclassified Bacteria	0	0	0	0	0	5.51785e-05	8.97666e-05	2.9967e-05	0	0	0	0	0	0	0	0	0.00023254	0.000161348	0	0	0	0	0	0	0	0	0	0	0	0	0	0	0	0	0	0	0	0	0	0	0	0	0	0	0	0	0	0
Otu0547	Unclassified Caulobacteraceae	0	0	0	0.000198491	0.000112284	0.000110357	0	0.000329637	0.000237192	0	0	0	0	0	0	0	0	0	0	0	0	0	0	0	0	0	0	2.83567e-05	0	0	0	0.00153692	0	0	0	2.84519e-05	6.84932e-05	0	0	0	0	0	4.35398e-05	0	0	0	0	0
Otu0548	Unclassified Bacteria	0	0	0	0	0	0	0	0	0	0	0	0	0	4.30274e-05	0	0	7.75134e-05	9.68085e-05	0	0	0	0	0	0	0	0	0	0	0	0	0	0	0	0	0	0	0	0	0	0	0	0	0	0	0	0	0	0
Otu0549	Unclassified Parachlamydiaceae	0	0.000179319	0	0	0	0	0	0	9.48767e-05	0	0	0	0	0	0	0	0	0	0	0	0	0	8.04311e-05	0	0	0	0	0	0	0.000382687	0	0	0	5.77034e-05	0	0	0	0	0	0	1.93211e-05	0	0	0	0	0	0	0
Otu0550	Ferruginibacter	0.000761035	5.97729e-05	0	0	0	0	0	2.9967e-05	4.74383e-05	0	0	0	0	0	0	0	7.75134e-05	0	0	0	0	0	0.000120647	0	0	0	0	0.000141784	0.000283238	0	0	0	0	0	0	0	0	0	0	0	0	0	0	0	0	0	0	0
Otu0551	Peredibacter	0	0.000239091	0.000883965	0.000463147	0	5.51785e-05	0.0002693	0.00050944	0.000332068	0	8.63011e-05	8.80721e-05	0.00027243	0	0.000152099	0	0	0.000129078	0	0	0.00016675	0	0	0	0.000145858	0	2.9391e-05	0	8.49714e-05	3.82687e-05	0	0	0	0	0	0	0	0	0	0	0	0	0	0	0	0	0	0
Otu0552	Unclassified Bacteria	0	0.000179319	5.8931e-05	0	0	0.000275893	0	0	0.000142315	0	8.63011e-05	8.80721e-05	0.00018162	8.60548e-05	0	0	7.75134e-05	0	0	0	0	0	0	0	0.000204201	0	0	0	0	0.000191344	0	0	0	0	0	0	3.42466e-05	0	0	0	0	0	0	0	0	0	0	0
Otu0553	Unclassified Bacteria	0	0	0	0	0	0	0.000179533	0	0	0	0	0	0	0	0.000152099	0	7.75134e-05	0	0	0	8.3375e-05	0	0	0	0	0	8.81731e-05	0	0	0.00030615	0	0.000413785	0	0	0	0	0	0	0	0	0	0	0	0	0	0	0	0
Otu0554	TM7_genus_incertae_sedis	0	0	0.000117862	0	0	5.51785e-05	0	0	0	0	2.8767e-05	0	0	0	0	4.64016e-05	0	6.4539e-05	0	0	5.55833e-05	0	0	0	0	0	0	0	0	0	0	0	0	0	0	2.84519e-05	0	0	0	0	0	0	0	0	0	0	0	0
Otu0555	Bacteriovorax	0	0	0	0.000132328	0	0.000110357	0	0	0	0	0	5.87147e-05	0	0	0.000152099	0	3.87567e-05	0	0	0	0	0	4.02156e-05	0	0	0	0	0	0	0	0	0	0	0	0	0	0	0	0	0	0	0	0	0	0	0	0	0
Otu0556	Unclassified Bacteroidetes	0	0	0.000117862	0	0	0	0	0	0	0	0	8.80721e-05	0.00027243	0	0	0	7.75134e-05	0	0	0	0	0	0.000160862	0	0	0	0	0	2.83238e-05	0	0	0	0	0	0	0	0	0	0	0	0	0	0	0	0	0	0	0
Otu0557	Campylobacter	0	0	0	0	0	0	0	0	0	0	0	0	0	0	0	0	0	0	0	0	0	0	0	3.97931e-05	2.91715e-05	0	0	0	0	0	0	5.91121e-05	3.09607e-05	0	0	0	0	0	0	0	0	0	0	0	0	0	2.91945e-05	0
Otu0558	Unclassified Planctomycetaceae	0	0	0	0	0	0	0	0	0	0	0	0	0	0	0	0	3.87567e-05	6.4539e-05	0	0	0	0	4.02156e-05	0	0	0	0	0	0	0	7.85978e-05	0	0	0	0	0	0	0	0	0	0	0	0	0	0	0	0	0
Otu0559	Unclassified Proteobacteria	0	0	0.000471448	0.000529311	0	0.000220714	0.000359066	0.000269703	4.74383e-05	0	0.000115068	0	0	0.000258164	0.000152099	9.28031e-05	7.75134e-05	0	0	0	5.55833e-05	0	0	0	0	0	0	0	0	0	0	0	0	0	0	0	0	0	0	0	0	0	0	0	0	0	0	0
Otu0560	Unclassified Bacteria	0	0	0	0	0	0	0	0	9.48767e-05	6.52465e-05	0	0	0	0	0	0	0	6.4539e-05	0	0	2.77917e-05	0	8.04311e-05	0	0	0	0	0	0	0	0	0	0	0	6.71141e-05	8.53558e-05	0	0	0	0	0	0	0	0	0	0	0	0
Otu0561	Bdellovibrio	0	0	0.000471448	0	0	0	0	0	0	0	0	0	0	0	0	4.64016e-05	0.000193783	6.4539e-05	0	0	0	0	4.02156e-05	0	0	0	0	0	0	0	0	0	0	0	0	0	0	0	0	0	0	0	0	0	0	0	0	0
Otu0562	Singulisphaera	0	0	0	0	0	0.000110357	0.000179533	0.00029967	0	0	0	0	0	0	0	0	7.75134e-05	0	0	0	0	0	8.04311e-05	7.95862e-05	0	0	0	0	0	0	0.000825277	0	0	0	0	0	0	0	0	0	0	0	0	0	0	0	0	0
Otu0563	Parachlamydia	0.000591916	0	0.000176793	0.000463147	0.000673703	5.51785e-05	0.000179533	0.000269703	0.00028463	9.78697e-05	0.000172602	0	0	4.30274e-05	0	9.28031e-05	7.75134e-05	0.000161348	0	0.000691616	0	0	0.000281509	3.97931e-05	0	0	0	0	0.000198267	0	0.000275092	0.000561565	3.09607e-05	0	0	8.53558e-05	0	0	0	0	1.93211e-05	0	2.17699e-05	0	0	0	0	0
Otu0564	Unclassified Rhizobiales	0	0	0	0	0	0.000441428	0	0.000239736	0	0	0	0	0	0	0	0	0	0	0	0	0	0	0	0	0	0	0	0	0	0	0	5.91121e-05	0	0	6.71141e-05	0	0	0	0	0	0	0	0	0	0	0	0	0
Otu0565	Unclassified Bacteria	0	0	0.000117862	0	0	0	0	2.9967e-05	0	0	2.8767e-05	0	0	0	0.000152099	0.000139205	3.87567e-05	3.22695e-05	0	0	0	0	0	0	0	0	0	0	0	0	0.000628783	0	0	0	0	0	0	0	0	0	0	0	0	0	0	0	0	0
Otu0566	Unclassified Bacteroidetes	0.000169119	0	0	0.000264655	0.000112284	0	0	0.000179802	0.000332068	0	0.000345205	8.80721e-05	0	0	0	0.000139205	0.000155027	0	0	0	0	0	0	3.97931e-05	0	0	0	0	0.000311562	0	0	0	0	0	0	0	0	0	0	0	0	0	0	0	0	0	0	0
Otu0567	Unclassified Rhodospirillaceae	0	0.000119546	0.000176793	0	0	0	0.0002693	8.99011e-05	0.000237192	0	0	8.80721e-05	0	0	0	0	0	0	0	0	0	0	0	0.000119379	0	0	0	0	2.83238e-05	0	3.92989e-05	0	0	0	0	0	0	0	0	4.0085e-05	1.93211e-05	0	0	0	0	0	0	0
Otu0568	Unclassified Proteobacteria	0	0	5.8931e-05	0	0	0	8.97666e-05	0	0	0	0	2.93574e-05	0	0	0	9.28031e-05	0	0	0	0	0	0	0	0	0	0	0	0	0	0	0	0	0	0	0.000100671	0	0	0	0	0	0	0	0	0	0	0	0	0
Otu0569	Unclassified Bacteria	0	0	0	0	0	0.000110357	0	0	4.74383e-05	0	0	0	0	0.000344219	0	0	0	0	0	0	0	8.22064e-05	0	0	0	0	0	0	2.83238e-05	0.000267881	0	0	0	0	0.000100671	0.000113808	0	0	0	0	0	0	0	0.00159628	0	0	0	0
Otu0570	Opitutus	0	0	0.000117862	0	0	0	0	0	0	0	8.63011e-05	5.87147e-05	0.00012108	0	0	0	3.87567e-05	0	0	0	0	0.00012331	0	0	0	0	0	0	0	0	7.85978e-05	0	0	0	0	0	0	0	0	0	0	0	0	0	0	0	0	0
Otu0571	Gemmata	0	0	0	0	0	0	0	0	0	0	0.000143835	0	0.00015135	0	0.000101399	4.64016e-05	0	0	0	0	0	0	0	0	0.000554259	0	0	0	0	0	0	0	0	0	0	0	0	0	0	0	0	0	0	0	0	0	0	0
Otu0572	Unclassified Bacteria	0	0	0	0	0	0	0.000179533	0	0	0	0	2.93574e-05	0	0	5.06997e-05	0	0	0	0	0	0	0	0	0	0	0	0	0	0	0	0	0	0	0	0	0	0	0	0	0	0	0	0	0	0	0	0	0
Otu0573	Unclassified Planctomycetaceae	0	0	0	0	0	0.000165536	0	5.99341e-05	0	0	0	0	0	0	0	4.64016e-05	0	0	0	0	0	0	0	0	0	0	0	0	0	0	3.92989e-05	0	0	0	0	0	0	0	0	0	0	0	0	0	0	0	0	0
Otu0574	Unclassified Acidobacteria_Gp3	0	5.97729e-05	0	0	0	0	0	5.99341e-05	0	0	0	5.87147e-05	0	0	0	0	0	0	0	0	0	0	0	0	0	0	0.000146955	0	0	3.82687e-05	0	0	0	0	0	0	0	0	0	0	0	0	0	0	0	0	0	0
Otu0575	Unclassified Alphaproteobacteria	0	0	0.000117862	0	0	0	0	0.000269703	0	0	8.63011e-05	0	0	0	0	0	0	0	0	0	2.77917e-05	8.22064e-05	0	0	2.91715e-05	0	0	0	0.000113295	0	0	0	0	0	0	0	0	0	0	0	0	0	0	0	0	0	0	0
Otu0576	Unclassified Betaproteobacteria	0.000169119	0	0	0	0	0	0	0	0	0	0	0	0	0	0	0	0	0	0	0	0	0	0	0	0	0	0	0	0	0	0	0	0	0	0	0	0	0	0	0	0	0	0	0	0	0	0	0
Otu0577	Unclassified Bacteria	0	5.97729e-05	0.000235724	0.000132328	0	0	0	2.9967e-05	0	0	0	0	0.00018162	0	0.000101399	0	0	6.4539e-05	0	0	0	8.22064e-05	0	0	0	0	0	0	2.83238e-05	0.000229612	0	0	0	0	0	0	0	0	0	0	0	0	0	0	0	0	0	0
Otu0578	Thiomonas	0	0	0	0	0	0	8.97666e-05	0	0	0	0	0	6.054e-05	0	0	0	0	0	0	0	0	0	0	0	0	0	0	0	0	0	0	0	0	0	0	0	0	0	0	0	0	0	0	0	0	0	0	0
Otu0579	Unclassified Bacteria	8.45594e-05	0	0.000117862	0.000529311	0	0.000165536	0	0	0.000142315	3.26232e-05	0	0	0	0	0	0	0	0	0	0	0	0	0	0	0	0	0	2.83567e-05	0	0	0.000117897	0	0	0	0	0	0	0	0	0	1.93211e-05	2.5503e-05	0	0	4.71209e-05	0	0	0
Otu0580	Unclassified Bacteria	0	0	0.000117862	0	0	0.000110357	0	0.000119868	0	0.000228363	0	0	3.027e-05	0.000387247	0	4.64016e-05	0	0	0	0	0	0	0	0	0	0	0	0	0	0	0	0	0	0	0	0	0.00010274	0	0	0	7.72842e-05	2.5503e-05	0	0	0	0	0	0
Otu0581	TM7_genus_incertae_sedis	0	0	0	0	0	0	0	5.99341e-05	9.48767e-05	0	0	2.93574e-05	0	0	0	0	0	0	0	5.12308e-05	0	0	8.04311e-05	7.95862e-05	0	0	0	2.83567e-05	0	7.65374e-05	0.000196495	0	0	0	0	0	0	0	0	0	0	0	6.53097e-05	0	0	0	0	0
Otu0582	Unclassified Betaproteobacteria	0	0.000119546	0	0	0	0	0	0	0	0	0	0	0	0	0	0	0	0	0	0	0	0	0	0	0	0	0	2.83567e-05	0	0	3.92989e-05	0	0	0	0	0	0	0	0	0	0	0	0	0	0	0	0	0
Otu0583	Unclassified Gammaproteobacteria	0	0.000358637	0.000117862	0	0	0.000275893	0.000807899	0.000209769	0.000237192	0	0	0	0	0	0	0	0	0	0	0	5.55833e-05	4.11032e-05	0	0	0	0	5.8782e-05	0	0.00022659	0	0	0	0	0	0	0	0.000205479	0	9.10747e-05	8.017e-05	0	0	8.70796e-05	0	0	0	0	0
Otu0584	Pedobacter	0.000169119	0	5.8931e-05	0	0.00123512	5.51785e-05	0	2.9967e-05	0	0	0	8.80721e-05	0	0	0	0	3.87567e-05	0	0	0	0	0	0	0	0	0	0	0	0	0	0	0	0	5.77034e-05	0	0	0	0	9.10747e-05	0	1.93211e-05	5.10061e-05	6.53097e-05	0	0	0	0	0
Otu0585	Ignavibacterium	0	0	0	0	0	0	0	0	0	0	0	0	0	0	0	0	0	6.4539e-05	0	0	0	0	0	0	0	0	0	2.83567e-05	0	7.65374e-05	0	0	9.28821e-05	0	0	0	0	0	0	0	0	0	0	0	0	0	0	0
Otu0586	Unclassified Bacteroidetes	0	0	5.8931e-05	0	0	0.000110357	0	0	0.000189753	0	0	0	0	0	5.06997e-05	0.000139205	0	0	0	0	0	0	0	0	0	0	0	0	0	0.000153075	0	0	0	0	0	0	0	0	0	0	0	0	0	0	0	0	0	0
Otu0587	Unclassified Deltaproteobacteria	0	0	0	0	0	0	0	0	0	0	0	0	6.054e-05	0	0	0	0	0	0	0	0	4.11032e-05	0	3.97931e-05	0	0	0	0	0	0	0	0	0	0	0	0	0	0	0	0	0	0	0	0	0	0	0	0
Otu0588	Unclassified Sphingomonadaceae	0	0	0	0	0	0	0	0	0	0	0	0	0	0	0	0	0	0	0	0	0	0	0	0	5.83431e-05	0	0	0	0	3.82687e-05	0	2.95561e-05	0	0	0	0	0	0	0	0	0	0	0	0	0	0	0	0
Otu0589	Unclassified Proteobacteria	0	0	0	0	0	0	0	0	0	0	0	2.93574e-05	0	0	0	0	0	0	0	0	0	0	0	0	0	0	0	0	0.000311562	0	0	0	0	0	0	0	0	0	0	0	0	0	4.35398e-05	0	0	0	0	0
Otu0590	Unclassified Bacteroidetes	8.45594e-05	0	0	0	0	0	0	0	4.74383e-05	0	0	0	0	0	0	0	0	0	0	0	0	0	0	0	0	0	0	0	0	0	0	0	0	0	0	0	0	0	0	0	0	0	2.17699e-05	0	0	0	0	0
Otu0591	Unclassified Rhodospirillales	0.000338238	0	5.8931e-05	0	0	0.000110357	0	0.000119868	0	0	0	0	0	0	0	0	0.00011627	0	0	0	0	0	0	0	0	0	0	0	0	0	0	0	0	0	0	0	0	0	0	0	0	0	4.35398e-05	0	0	0	0	0
Otu0592	Unclassified Acetobacteraceae	0	0	0	0	0	0	0	0	0	0	0	0	0	0	0	0	0	0	0	0	0	0	0	0	0	0	0	0	0	0	0	0	0	0	0	0	0	0	0	0	0	0	0	0	0	0	0	0
Otu0593	Unclassified Bacteria	0	0	0	0	0.000224568	0	0	0.000179802	9.48767e-05	0	0	0	0	0	0	4.64016e-05	0	0	0	0	0	0	0	0	0	0	0	0	0	0	0	0	0	0	0	0	0	0	0	0	0	0	0	0	0	0	0	0
Otu0594	Sphingomonas	0	0	0	0	0	0	0	0	0	6.52465e-05	0	0	0	0	0	0	0.00011627	0	0	0	0	0	0	0	0	0	0	0	0	0	0	0	0	0	0	0	0	0	0	0	0	0	0	0	0	0	0	0
Otu0595	Neochlamydia	0	0	0	6.61638e-05	0	0	0	2.9967e-05	0	0	0	0	3.027e-05	0	0	0	0	0	0	0	2.77917e-05	0	0	0	0	0	0	0	0	0	0	0	0	0	0	0	0	0	0	0	0	0	0	0	0	0	0	0
Otu0596	Unclassified Bacteroidetes	0	0	0	0	0	0	0	2.9967e-05	0	0	0	0	0	0	0	0.000185606	0	0	0	0	2.77917e-05	0	0	0	0	0	0	0	0	0	0	0	0	0	0	0	0	0	0	0	0	0	0	0	0	0	0	0
Otu0597	Unclassified Betaproteobacteria	0	0	0	0	0	0	0	0	0	0	5.75341e-05	0	0	0	0	0	0	0	0	0	0	0	0	0	0	0	0	0	0	0	0	0	0	0	0	0	0	0	0	0	0	0	2.17699e-05	0	0	0	0	0
Otu0598	Aquicella	0	0	0	0.000132328	0	0	0	2.9967e-05	0	0	0	0	0	0	0	0	0	0	0	0	0	0	0	0	0	0	0	0	0	0	0	0	0	2.88517e-05	0	0	3.42466e-05	0	0	0	1.93211e-05	2.5503e-05	2.17699e-05	0	0	0	0	0
Otu0599	Gp1	0	0	0	0	0	0	0	0	0	0	0	0	0	0	0	0	0	0	0	0	0	0	0	0	0	0	0	0	0	0	0	0	0	0	0	0	0	0	0	0	0	0	0	0	0	0	0	0
Otu0600	Unclassified Bacteria	0	5.97729e-05	0	0	0	0.000110357	0	0	0	0	0	0	0	0	0	0	0	0	0	0	0	0	0	0	5.83431e-05	0	0	0	0	0	0	0	0	0	3.3557e-05	0	0	0	0	0	0	0	0	0	0	0	0	0
Otu0601	Unclassified Proteobacteria	0	0	0.000825034	0	0	0.000110357	0	0.000149835	0	0	8.63011e-05	0	0	0	0	0	0	0	0	0	5.55833e-05	0	0	3.97931e-05	0	0	0	0	0	0	0	0	0	0	0	0	0	0	0	0	0	0	0	0	0	0	0	0
Otu0602	Ferribacterium	0	5.97729e-05	0.000235724	0	0	0	0	0	0	0	0	0	0	0	0	0	3.87567e-05	0	0	0	0	0	0	0	0	0	0	0	0	0	0	0	0	0	0	0	0	0	0	0	0	0	0	0	0	0	0	0
Otu0603	Unclassified Burkholderiales	0	0.000119546	0.000176793	0	0.000673703	0	0.000359066	0	0.00028463	0	0	0	0	0	0	0	0	0	0	0.000204923	0	0	0	0	0	0	0	0	0.000396533	0	0	0	0	0	0	2.84519e-05	0	0	0	0	0	0	4.35398e-05	0	0	0	0	0
Otu0604	Unclassified Betaproteobacteria	0	0.000298864	0.000176793	0.000595474	0	0.000110357	0	0.000119868	0.000237192	0	0.000201369	0	0	8.60548e-05	5.06997e-05	0	0.000155027	0	0	0	0	0	0	0	0	0	0	0	0.000141619	0	0	0	9.28821e-05	0	0	0	0	0	0	0	0	0	4.35398e-05	0	0	0	0	0
Otu0605	Unclassified Rhodospirillales	0.000253678	0.000179319	0.000235724	0.000463147	0.000112284	5.51785e-05	0	2.9967e-05	0.000426945	0	0	5.87147e-05	0	8.60548e-05	0	0	0	0	0	0	0	0.000164413	0.000160862	0	0	0	0	0	0	0	0	0	0	2.88517e-05	0	2.84519e-05	3.42466e-05	0	0	0	0	0	0	0	9.42418e-05	0	0	0
Otu0606	Unclassified Rhizobiales	0	0	0	0	0	0	0	0	0	0	0	0	0	0	0	0	7.75134e-05	0	0	0	0	4.11032e-05	0	0	0	0	0	0	0	3.82687e-05	0	0	0	0	0	0	0	0	0	0	0	0	0	0	0	0	0	0
Otu0607	Unclassified Alphaproteobacteria	0	0.000119546	0	6.61638e-05	0	0	0	0	0	0	0	0	0	8.60548e-05	0	0	0	0	0	0	0	0	0	0	0	0	0	0	0	0	0	0	0	0	0	0	0	0	0	0	3.86421e-05	0	0	0	0	0	0	0
Otu0608	Unclassified Bacteria	0	0	0	0	0	0	0	0	0	0	0	0	0	8.60548e-05	0	0	0	0	0	0	0	0	0	0	5.83431e-05	0	0	0	0	7.65374e-05	0	0	0	0	0	0	0	0	0	0	0	0	0	0	0	0	0	0
Otu0609	Unclassified Acidobacteria_Gp3	0	0	0	0	0	0	0	0	0	0	0	0	0	0	0	0	0	0	0	0	0	0	0	0	0	0	0	0	0	0	0.000157196	0	0	0	0	0	0	0	0	8.017e-05	0	0	0	0	0	0	0	0
Otu0610	Conexibacter	0	0	0	0	0	0	0	0	0	0	0	0	0	0	0	0	0	0	0	0	0	0	0	0	0	0	0	0	0	0	0	0	0	0	0	0	0	0	0	0	0	0	0	0	0	0	0	0
Otu0611	Unclassified Burkholderiales	0	0	0	0	0	0	0	0	0	0	0	0	0	0	0	0	0	0	0	0	0	0	0	0	0	0	0	0	0	0	0	0	3.09607e-05	0	0	0	0	0	0	0	0	0	0	0	0	3.51704e-05	0	0
Otu0612	Unclassified Burkholderiales	0	0	0	0	0	0	0	0	0	0	2.8767e-05	0	0	0	0	0	0	6.4539e-05	0	0	0	0	0	0	0	0	0	0	8.49714e-05	0	0	0	0	0	0	0	0	0	0	0	0	0	0	0	0	0	0	0
Otu0613	Unclassified Bacillales	0	0	0	0	0	0	0	0	0	0	0	0	0	0	0	0	0	0	0	0	0	0	0	0	0	0	0	0	0	0	0	0	0	0	0	0	0	0	0	0	0	0	0	0	0	0	0	0
Otu0614	Clostridium_III	0	5.97729e-05	0	0	0	0	0.0002693	0	0	0	0	5.87147e-05	0	0	0	0	0	0	0	0	0	0	0	0	0	0	0	2.83567e-05	0	0	0	0	0	0	0	0	0	0	0	0	0	0	0	0	0	0	0	0
Otu0615	Hydrogenophaga	0	0	0	0	0	0	0	0	0	0	0	0	0	0	0	0	0	0	0	0	0	0	0	0	0	0	5.8782e-05	0	0	0	0	2.95561e-05	0	2.88517e-05	0	0	0	0	0	0	0	0	0	0	0	0	0	0
Otu0616	Herminiimonas	0	0	0	0	0	0	0	0	0	0	0	0	0	0	0	0	0	0	0	0	0	0	0	0	0	0	8.81731e-05	0	0	3.82687e-05	0	0	0	0	0	0	0	0	0	0	0	0	0	0	0	0	0	0
Otu0617	Unclassified Bacteria	0	0	0	0	0	0	0	0	0	0	0	0	0	0	0	0	0	0	0	0	0	0	0	0	0	0	0	0	0	0	0	0	0	0	0	0	0	0	0	0	0	0	0	0	0	0	0	0
Otu0618	Unclassified Gammaproteobacteria	0	0	0.000117862	0.000132328	0	0	0.000179533	0	0	0	0	0.000205502	0	0	0	4.64016e-05	7.75134e-05	0	0	0.000307385	0	0	4.02156e-05	3.97931e-05	0.000116686	0	0	8.50702e-05	0	0	3.92989e-05	0	0	0	0	0	0	0	0	0	0	0	0	0	0	0	0	0
Otu0619	Spartobacteria_genera_incertae_sedis	0	0	0	0	0	0	0	0	0	0	0	0	0	0	0	0	0	0	0	0	0	0	0	0	0	0	0	0	0	0	0	0	0	0	0	0	0	0	0	0	0	0	0	0	0	0	0	0
Otu0620	Bifidobacterium	0	0	0	0	0.000112284	0	0	0	0	0	0	0	0	0	5.06997e-05	0	0	0	0	0	0	0	0	0	0	0	0	0	0	0	0	0	0	0	0	0	0	0	0	0	0	0	0	0	0	0	0	0
Otu0621	Bdellovibrio	0.000930154	0.000358637	0.00153221	0	0.000224568	0	0	0.000149835	0.000379507	0	0	0.000146787	0	0	0	0.000185606	0.00034881	9.68085e-05	0	0	0.000138958	4.11032e-05	0	0	8.75146e-05	0.000501316	0	0.00017014	0	0.000765374	0.000117897	0	0	0	0	0	0	0	0	0	0	0	0	0	0	0	0	0
Otu0622	Unclassified Rhodospirillales	0	0	0	0	0	5.51785e-05	0	5.99341e-05	0	0	0	0	0	0	0	0	0	0	0	0	0	0	0	0	5.83431e-05	0	0	0	0	0	0	0	0	0	0	0	0	0	0	0	0	0	0	0	0	0	0	0
Otu0623	Unclassified Intrasporangiaceae	0	0	0	0	0	0	0	0	0	0	0	0	0	0	0	0	0	0	0	0	0	0	0	0	0	0	0	0	0	0	0	0	0	0	0	0	0	0	0	0	0	0	0	0	0	0	0	0
Otu0624	Aurantimonas	0	0	0	0	0	0.000165536	8.97666e-05	5.99341e-05	0	0	0	0	0	0	0	0	0	0	0	0	0	0	0	0	0	0	0	0	0	0	0	0	0	0	0	0	0	0	0	0	0	0	0	0	0	0	0	0
Otu0625	Unclassified Bacteria	0	0	0.000117862	0	0	0	0	0	0	0	0	0	0	0	0	0	0	0	0	0	0	0	0	0	0	0	2.9391e-05	0	0	0	0	0	0	0	0	0	0	0	0	0	0	0	0	0	0	0	0	0
Otu0626	Unclassified Bacteria	0	0	5.8931e-05	6.61638e-05	0.000224568	0.000110357	0	0.000209769	0.000142315	0	0	5.87147e-05	0.00018162	0	0	0	0	0	0	0	0	0	0	0	0	0	0	0	8.49714e-05	0	7.85978e-05	0	0	0	0	0	0	0	0	0	1.93211e-05	0	0	0	0	0	0	0
Otu0627	Unclassified Clostridia	0	0	0.000117862	0.000595474	0	0.000110357	8.97666e-05	0.000179802	0	0	0	0	0	0	5.06997e-05	9.28031e-05	0	0	0	0	0	8.22064e-05	8.04311e-05	0	0	0	0	0	0	0	0	0	0	0	0	0	0	0	0	0	0	0	0	0	0	0	0	0
Otu0628	OD1_genus_incertae_sedis	8.45594e-05	0	0	0	0	0	0.000359066	0.000269703	0	0	0	0	0	0	0	0	0	0.000129078	0	0	0	0	0	0	0	0	0	0	0.000311562	0	0	0	0	0	0	0	0	0	0	0	0	0	0	0	0	0	0	0
Otu0629	Unclassified Rhodocyclaceae	0	0.000179319	5.8931e-05	0	0	0	0	0	9.48767e-05	0	0	0	0	0	5.06997e-05	0	0	0	0	0	0	0	0	0	5.83431e-05	0	0	0	5.66476e-05	0	0	0	0	0	6.71141e-05	5.69039e-05	0	3.1346e-05	0	0	0	0	0	0	0	0	0	0
Otu0630	Unclassified Alphaproteobacteria	0.000169119	0	0	0	0	0	8.97666e-05	0	0	0	0	0	0	0	0	0	0	0	0	0	0	0.00012331	0	0	0	0	0	0	0	0	0	0	0	0	0	0	6.84932e-05	0	0	0	0	0	0	0	0	0	0	0
Otu0631	Unclassified Bacteria	0	0	0.000117862	0.000198491	0	0	0	2.9967e-05	0	0	0	2.93574e-05	3.027e-05	0	0	0	0	0	0	0	0	0	0	0	0	0	0	0	0	0	0	0	0	0	0	0	0	0	0	0	0	0	0	0	0	0	0	0
Otu0632	Unclassified Bacteria	0	5.97729e-05	0	6.61638e-05	0	0	0	0	0	0	0	0	0	0	0	0	0	0	0	0	0	0	0	0	0	6.26645e-05	0	0	0	0	3.92989e-05	0	0	0	0	0	0	0	0	0	0	0	0	0	0	0	0	0
Otu0633	Bdellovibrio	0	0.000657501	0.000766103	0	0.00145969	0	0	0.000119868	0.000711575	0	0.000172602	0	0	0	5.06997e-05	0	0.000193783	0	0	0	0	0	0	0	5.83431e-05	0	0	0	0.000339886	0.000114806	0	0	0	0	0	0	0	0	0	0	0	0	0	0	0	0	0	0
Otu0634	Unclassified Alphaproteobacteria	0	0	0.000117862	0	0	0	0	0	0.000142315	0	0	5.87147e-05	0	0	0	4.64016e-05	0	0	0	0	2.77917e-05	0	0	0	0	0	0	2.83567e-05	0	0	0	0	0	0	0	0	0	0	0	0	0	0	0	0	0	0	0	0
Otu0635	Unclassified Actinobacteria	0	0	0	0	0	0	0	0	0	0	0	0	0	0	0	0	0	0	0	0	0	0	0.000120647	0	0	0	0	0	0	0	0	0	0	0	0	0	0	0	0	0	3.86421e-05	0	0	0	0.000141363	0	0	0
Otu0636	Unclassified Bacteria	0.000169119	0	0	0	0.000112284	0	0	8.99011e-05	4.74383e-05	0	0	0	0	0	0	4.64016e-05	0	0	0	0	2.77917e-05	0	0	0	0	0	0	0	0	0	0	0	0	0	0	0	0	0	0	0	0	0	0	0	0	0	0	0
Otu0637	Unclassified Comamonadaceae	0	0	0	0	0	0	0	0	0	0	0	0	0	0	0	0	0	0	0	0	0	0	0	0	0	0	0	5.67135e-05	0	0	0	0	0	0	0	0	0	0	0	0	0	0	0	0	0	0	0	0
Otu0638	Unclassified Bacteria	0	0	0	0	0	0	0	0	0	0	0	0	0	0	0	0	0	0	0	0	0	0	0	0	0	0	0	0	0	0	0	0	0	0	0	0	0	0	0	0	0	0	0	0	0	0	0	0
Otu0639	Geobacillus	0	0	0	6.61638e-05	0	5.51785e-05	0	0	0	0	0	0	0	0	0	0	0	0	0	0	0	0	0	0	0	0	0	0	0	0	0	0	0	0	0	0	0	0	0	0	0	0	0	0	0	0	0	0
Otu0640	Unclassified Bacteria	8.45594e-05	0.000119546	0	0	0	0	0	0.000149835	4.74383e-05	0	0	0	0	0	0	4.64016e-05	0	0	0	0	0	0	0	0	0	0	0	0	0	0.000114806	0	0	0	0	0	0	0	0	0	0	0	0	0	0	0	0	0	0
Otu0641	Unclassified Bacteria	0	0.000119546	0	0.000396983	0	0	0	0	0	0	0	0	0	0	0	0	0	0	0.000111991	0	0	0	0	0	0	0	0	0	0	0.000191344	0	0	0	0	0	0	0	0	0	0	0	0	0	0	0	0	0	0
Otu0642	Rheinheimera	0	0	0.00058931	0.000198491	0	0	0	0.000329637	0	0.000424102	0	0	0	0	0	0	0	0	0	0	0	4.11032e-05	0	0	0	0	0	0	0	0	0	0	0	0	0	0	0	0	0	0	0	0	0	0	0	0	0	0
Otu0643	Unclassified Planctomycetaceae	0	0	0	0	0	0	0	0	0	3.26232e-05	0	5.87147e-05	9.081e-05	0	5.06997e-05	0	0	0.000129078	5.59957e-05	0	2.77917e-05	0.000287722	0	0	0	0	0	0	0	7.65374e-05	0	0	0	0	3.3557e-05	0	0.00010274	0.000125384	0.000121433	0.00016034	0.000115926	0	0.000152389	0	0	0	0	0
Otu0644	Unclassified Bacteria	0	0	0	0	0	0	0	0	0	0	0	0	0	0	0	0	0	0	0	0	0	0	0	0	0	0	0	0	0	0	0	0	0	0	0	0	0	0	0	0	0	0	0	0	0	0	0	0
Otu0645	Unclassified Bacteria	0.000169119	0	0	0	0	0.000165536	0	2.9967e-05	0	0	0	0	0	0	0	0	0	0	0	0	2.77917e-05	0	0	0	0	0	0	0	0	0	0	0	0	2.88517e-05	0	0	0	0	0	0	0	0	2.17699e-05	0	0	0	0	0
Otu0646	Ilumatobacter	0	0	0	0	0	0	0	0	0.000189753	0.000326232	0	2.93574e-05	0	0.000430274	0	0	0	0	0	0	0	0	0	0	0	0	0	0	0	0	0	0	0	0	0	0	0	0	0	0	0	0	0	0	0	0	0	0
Otu0647	Enterococcus	0	0	0	0	0	0	0	0	0	0	0	0	0.00015135	0	0	0	0	0	0	0	0.000111167	0	0	0	0	0	0	0	0.000141619	0	0	0	0	0	0	0	0	0	0	0	3.86421e-05	0	0	0	0	0	0	0
Otu0648	Bdellovibrio	0	0	0.000176793	0	0	0	0.0002693	0	0	0	0.000201369	0	0	0	0	0	0	0	0	0	0	0	0	0	0	0	0	0	0	0	0	0	0	0	0	0	0	0	0	0	0	0	0	0	0	0	0	0
Otu0649	Unclassified Bacteria	0	0	0	0	0	0	0	0	0	0	0	0.000176144	0	0	0	0	0	0	0	0	0	4.11032e-05	0	0	0	0	0	0	8.49714e-05	0	0	0	0	0	0	0	0	0	0	0	0	0	0	0	0	0	0	0
Otu0650	Unclassified Gammaproteobacteria	0	0	0	0	0	0	0	0	0	0	0	0	0	0	0	0	0	0	0	0	0	0	0	0	0	0	0	0	0	0	0	0	0	0	0	0	0	0	0	0	0	0	0	0	0	0	0	0
Otu0651	Ferruginibacter	0	0	0	0	0	5.51785e-05	0	5.99341e-05	0	0	0	0	0	0	0	0	0	0	0	0	0	0	4.02156e-05	0	0	0	0	0	0	0	0	0	0	0	0	0	0	0	0	0	0	0	0	0	0	0	0	0
Otu0652	Pedobacter	0	0	0	0.000396983	0.000112284	0	0	0	0	0	0	0.000146787	0	0	0	0	0	0	0	0	0	0	0	0	0	0	0	0	0	0	0	0	0	0	0	0	0	0	0	0	0	0	0	0	0	0	0	0
Otu0653	Unclassified Rhodobacteraceae	0	0	0	0	0	0	0.000179533	2.9967e-05	0	0	0	0	0	0	0	0	0	0	0	0	0	0	0	0	0	0	0	0	0	0	0	0	0	0	0	0	0	0	0	0	0	0	0	0	0	0	0	0
Otu0654	Unclassified Hyphomicrobiaceae	8.45594e-05	0	0	0	0.000561419	0	0.000359066	5.99341e-05	0	0	0	0	0	0	0	0	0	0	0	0	0	0	0	0	0	0	0	0	0	0	0	0	0	0.000115407	6.71141e-05	0	0	0	6.07165e-05	0	0	0	4.35398e-05	0	0	0	0	0
Otu0655	Unclassified Bacteria	0	0	0	0.000198491	0	0.000110357	0	2.9967e-05	0	0	8.63011e-05	2.93574e-05	0	0	0	0	0	0	0	0	0	0	0	0	0	0	0	0	0	0	0	0.000443341	0	0	0	0	0	0	0	0	0	0	0	0	0	0	0	0
Otu0656	Unclassified Bacteria	0	0.000119546	5.8931e-05	0	0	0	0	0	0	0	0.000115068	0	0	0	0	0	0	0	0	0	0	4.11032e-05	8.04311e-05	0	0	0	0	0	0	0	0	0	0	5.77034e-05	0.000100671	2.84519e-05	3.42466e-05	0	0	4.0085e-05	3.86421e-05	0.000102012	0	0	0	0	0	0
Otu0657	Legionella	0	0	0	0	0	0	0	0	0	0	0	0	0	0	0	0	0	0	0	0	0	0	0	0	0	0	0	0	0	0	0	0	0	2.88517e-05	0	2.84519e-05	0	3.1346e-05	0	0	5.79632e-05	0	0	0	0	0.000211022	0	0
Otu0658	Rhizobium	0	0	0.000117862	0	0	0	0	0	0	0	0	0	0	0	0	0	0	0	0	0	0	0	0	0	0	0	0	0	2.83238e-05	0	0	0	0	0	0	0	0	0	0	0	0	0	0	0	4.71209e-05	0	0	0
Otu0659	Unclassified Proteobacteria	0	0	5.8931e-05	0	0.000224568	0.000110357	0	0.000149835	0	0	2.8767e-05	0	0	0	0	0	3.87567e-05	0	0	0	0	0	0	0	0	0	0	0	0.000396533	0	0	0	0	0	0	0	0	0	0	0	0	0	0	0	0	0	0	0
Otu0660	Unclassified Bacteria	0	0	0	0	0	0	0	0	0	0	2.8767e-05	8.80721e-05	0	0	0	4.64016e-05	0	0	0	0	2.77917e-05	0	0	0	0	0	0	0	0	0	0	0	0	0	0	0	0	0	0	0	0	0	0	0	0	0	0	0
Otu0661	Unclassified Bacteriovoracaceae	0	0	0.000117862	0	0	5.51785e-05	0.000807899	0	0	0	0	0	0	0.000344219	0	0	7.75134e-05	0	0	0	2.77917e-05	0	4.02156e-05	0.000119379	0	0	0	0	0.000198267	0	0	0	0	0	0	0	0	0	0	0	0	0	0	0	0	0	0	0
Otu0662	Unclassified Proteobacteria	0	0	0	0	0	0	0	0	0	0	0	0	3.027e-05	0.000129082	0	0	0	0	0	0	0	0	0	0	0	0	0	0	0	0	0	0	0	0	0	0	0	0	0	0	0	0	0	0	0	0	0	0
Otu0663	Unclassified Rhizobiales	0	0	0	0	0	0.000110357	0	0	0	0	0	0	0	0	0	0	0	0	0	0	0	0	0	0	0	0	0	0	0	0	0	0	0	0	0	0	0	0	0	0	0	0	2.17699e-05	0	0	0	0	0
Otu0664	Unclassified Betaproteobacteria	0	0	0	0	0	0	0	0	0	0	0	0	0	0	0	0	0	0	0	0	0	0	0	0	0	0	0	0	0	0	0	0	0	0	0	0	0	3.1346e-05	0	0	0	0	4.35398e-05	0	0	0	0	0
Otu0665	OD1_genus_incertae_sedis	0	0.000119546	0	6.61638e-05	0	0	0.0002693	0.000119868	0	0	0	0	0	0	0	4.64016e-05	0	0	0.000447966	5.12308e-05	0	0	0	0	0.000116686	0	0	0	0	0	0	0	0	0	0	0	0	0	0	0	0	0	0	0	0	0	0	0
Otu0666	Unclassified Comamonadaceae	0	0	0	0	0	0	0	0	0	0	8.63011e-05	0	0	0	0	0	0	0	0	0	0	0	0	0	0	0	0	0	0	7.65374e-05	0	0	0	0	0	0	0	0	0	0	0	0	0	0	0	0	0	0
Otu0667	Unclassified Proteobacteria	0	0	0.000294655	0	0	0	0	0	0.000142315	0	0	0	0	0	5.06997e-05	0	0	0	0	0.000128077	0	0	0	0	0	0	0	0	0	0	0	0	0	0	0	0	0	0	0	0	0	0	0	0	0	0	0	0
Otu0668	Unclassified Bacteroidetes	0	0	0	0	0	0	0	0	0	0	8.63011e-05	0	0	0	0	0.000185606	0	0	0	0	0	0	0	0	0	0	0	2.83567e-05	0	0	0	0	0	0	0	0	0	0	0	0	0	0	0	0	0	0	0	0
Otu0669	Ochrobactrum	0	0	0	0	0	0	0	0	0	0	0	0	3.027e-05	0	0	0	0	0	0	0	2.77917e-05	0	0	0	0	0	0	0.000113427	2.83238e-05	0	0	0	0	0	0	0	0	0	0	0	0	0	0	0	0	0	0	0
Otu0670	Unclassified Bacteria	0	0	0	0	0	0	0	0	0	0	0	0	0	0	0	0	0	0	0	0	0	0	0	0	0	0	0	0	0	0	0	0	0	0	0	0	0	0	0	0	7.72842e-05	0	0	0	0	0	0	0
Otu0671	Prevotella	0	0	0	0	0	0	0	0	0	0	0	0	0	0	0	0	3.87567e-05	0	0	0	0	0	0	0	0	0	0	0	0	0	0	2.95561e-05	3.09607e-05	0	0	0	0	0	0	0	0	0	0	0	0	0	0	0
Otu0672	Unclassified Proteobacteria	0	0	0	0	0.000112284	0	0	0	0	0	0	0	0	0	0.000152099	0	3.87567e-05	0	0	0	0	0	0	0	0	0	0	0	0	0	0	0	0	0	0	0	0	0	0	0	0	0	0	0	0	0	0	0
Otu0673	Unclassified Cystobacteraceae	0	0	0	0	0	0	0	0	0	0	0	0	0	0	0	0	0	0	0	0	0	0	0	0	0	0	0	0	0	0	0	0	0	0	0	0	0	0	0	0	0	0	0	0	0	0	0	0
Otu0674	Unclassified Proteobacteria	0	0	0	0	0	0	0	5.99341e-05	0	0	0.000201369	0	0	0	0	0	0	0	0	0	0	0	0	0	0	0	0	0	0	0	0	0	0	0	0	0	0	0	0	0	0	0	0	0	0	0	0	0
Otu0675	Moritella	0	0	0	0	0.00134741	0	0	0	0	0	0	0	0	0	0	0	0	0	0	0	0	0	0	0	0	0	0	0	0	0	0	0	0	0	0	0	0	0	0	0	0	0	0	0	0	0	0	0
Otu0676	Unclassified Proteobacteria	0.000169119	0	0.000353586	0.000132328	0	5.51785e-05	0	0.00029967	0	0.000293609	8.63011e-05	5.87147e-05	0	0.000129082	0	9.28031e-05	3.87567e-05	0	0	2.56154e-05	0	4.11032e-05	0	0	0	0	0	0.00017014	8.49714e-05	0	0	0	0	0	0	2.84519e-05	3.42466e-05	0	0	8.017e-05	0	0	0	0	0	0	0	0
Otu0677	Ilumatobacter	0	0	0	0	0	5.51785e-05	0	5.99341e-05	0	0	0	0	0	0	0	0	0	0	0	0	0	0	0	0	0	0	0	0	0	0	0	0	0	0	0	0	3.42466e-05	0	0	0	0	0	0	0	0	0	0	0
Otu0678	Bdellovibrio	0	0	0	0	0	0.000165536	0	0	0	3.26232e-05	0	5.87147e-05	0	0	0	4.64016e-05	3.87567e-05	0	0	0	0	0	0	0	0	0	0	0	0	0	0	0	0	0	0	0	0	0	0	0	0	0	0	0	0	0	0	0
Otu0679	Gp3	0	0	0.000353586	0	0.000673703	0	0	0.000149835	0	0	0	0	0	0	0	0	0	0	0	0	0	0	0	0	0	0	0	0	0	0	0	0	0	0	0	0	0	0	0	0	0	0	0	0	0	0	0.000262751	0
Otu0680	Unclassified Bacteroidetes	0	0	5.8931e-05	0	0	0	0	0	0	0	0.000258903	0	0	0.000129082	0.000101399	0	0	0	0	0	0	0.00012331	0	0.000119379	0	0	0	0	0	0	0	0	0	0	0	0	0	0	0	0	0	0	0	0	0	0	0	0
Otu0681	Unclassified Bacteria	0	0.000119546	5.8931e-05	0	0	5.51785e-05	0	5.99341e-05	0	0	0	0	0.00024216	0	5.06997e-05	0	0.00023254	0	0	0.000409847	2.77917e-05	0	0	0	0	0	0	0	0	0	0	0	0.000216725	0	0	0	0	0	0	0	0	0	0	0	0	0	0	0
Otu0682	Unclassified Sphingobacteriales	0	0	0.000117862	0	0	0	0	2.9967e-05	0	0	5.75341e-05	2.93574e-05	0	0	0	9.28031e-05	0	0	0	0	0	0	0	0	0	0	0	0	0	0	0	0	0	0	0	0	0	0	0	0	0	0	0	0	0	0	0	0
Otu0683	Unclassified Planctomycetaceae	0	0	0.000117862	0	0	0	0	2.9967e-05	0	0	0	0	0	0	0	0	0	0	0	0	0	0	0	0	0	0	0	0	0	0	0	0	0	0	0	0	0	0	0	0	0	0	0	0	0	0	0	0
Otu0684	Unclassified Bacteria	0	0	0.000235724	0	0	0	8.97666e-05	0.000239736	0.000142315	0	0	0	0	0	5.06997e-05	0	0	0	0	0	0	0.000246619	0	0.000119379	0	0	2.9391e-05	0	0	0.00030615	0	0	0	2.88517e-05	0	0	0	0	6.07165e-05	0	0	0	2.17699e-05	0	0	0	0	0
Otu0685	Bdellovibrio	0.00135295	0	0.000412517	0	0	0	0	5.99341e-05	0	0	0	5.87147e-05	0	0	0	9.28031e-05	3.87567e-05	0	0	0	0	0	0	0	0	0	0	0	0	0	0	0	0.000464411	0	0	0	0	0	0	0	0	0	0	0	0	0	0	0
Otu0686	Unclassified Rhodobacteraceae	0	0	0	0	0	0	0	0	0	0	0	0	0	0	0	0	0	0	0	0	0	0	0	3.97931e-05	0	0	0	0	5.66476e-05	0	0	0	0	0	0	0	0	0	0	0	0	0	0	0	0	0	0	0
Otu0687	Unclassified Bacteria	0	0	5.8931e-05	0	0.000449135	0.000220714	0.000179533	0	4.74383e-05	0	0	8.80721e-05	0	0	0.000101399	0	0	0	0	0	0	0	0	3.97931e-05	0	0	0	0	0	0	0	0	0	0	0	0	0	0	0	0	0	0	0	0	0	0	0	0
Otu0688	Unclassified Bacteria	0	0	0	0	0	0.000110357	8.97666e-05	2.9967e-05	4.74383e-05	0	0	0	0	0	0	0	0	0	0	0	0	0	0	0	0	0	2.9391e-05	2.83567e-05	0.000198267	0	7.85978e-05	0	0	0	0	0	0	0	0	0	0	0	0	0	0	0	0	0
Otu0689	Dietzia	0	0	0	0	0	0.000220714	8.97666e-05	0	0.000521822	0	0	0	0	0	0	0	0	0	0	0	0	0	0	0	0	0	0	0	0	0	0	0	0	0	0	0	0	0	0	0	0	0	0	0	0	0	0	0
Otu0690	Unclassified Bacteria	0	0.000298864	0.000471448	0	0	0	0	8.99011e-05	0	0	0	0	0.00012108	0	0.000101399	0	3.87567e-05	0	0	0	0	0	0.000281509	7.95862e-05	0	0	0.000176346	0	0	0	0	0	0	0	0	0	0	0	0	8.017e-05	0	0	2.17699e-05	0	0	0	0	0
Otu0691	Unclassified Sphingomonadales	0.000253678	0	0	0	0	0	0	0	0.000189753	0	2.8767e-05	0	0	0	0	0	0	0	0	0	0	8.22064e-05	0	0	0	0	5.8782e-05	0	0	0	7.85978e-05	0	0	8.65551e-05	0	0	0	0	0	0	0	0	0	0	0	0	0	0
Otu0692	Unclassified Bacteria	0	0	5.8931e-05	0	0	0	0	0	0	9.78697e-05	0	0	0	0	0	0	0	0	0	0	0	0	0	0	0	0	5.8782e-05	0	0	0	0.000157196	0	0	0	0	0	0	0	0	0	0	0	0	0	0	0	0	0
Otu0693	Desulfovibrio	0	0	0	0	0	0	0	0	0	0	0	0	0	0	0	0	0	0	0	0	0	0	0	0	0	0	0	0	0	0	0	0	0	0	0	0	0	0	3.03582e-05	0	0	0	2.17699e-05	0	0	0	0	0
Otu0694	Unclassified Bacteria	0	5.97729e-05	0	6.61638e-05	0	0	0	0	0	0	0	0	0	4.30274e-05	0	0	0	0	0	0	0	0	0	0	0	0	0	0	0	0	0	0	0	0	0	0	0	0	0	0	0	0	0	0	0	0	0	0
Otu0695	Unclassified Bacteria	0	0	0	0	0	0	0	0	0	0	0	0	6.054e-05	0	0	0	0	0	0	0	0	4.11032e-05	0	0	0	0	0	0	0	0	3.92989e-05	0	0	0	0	0	0	0	0	0	0	0	0	0	0	0	0	0
Otu0696	Unclassified Rhizobiales	0	0	0	0	0	0	0	0	0	0	0	0	0	0	0	0	3.87567e-05	0	2.79979e-05	0	0	0	0	0	0	0	0	0	2.83238e-05	0	0	0	0	0	0	0	0	0	0	0	0	0	0	0	0	0	0	0
Otu0697	Unclassified Gammaproteobacteria	0	0.000179319	0	0	0	0	0.000718133	0.00134852	9.48767e-05	0	2.8767e-05	0	0	0	0	9.28031e-05	3.87567e-05	0	0	0	5.55833e-05	0	0.000120647	0	0	0	0	0	0	0	0	0	0	0	0	0	0	0	0	0	0	0	0	0	0	0	0	0
Otu0698	OD1_genus_incertae_sedis	0.000591916	0.000119546	0.000117862	0	0.000336852	0.000165536	0	0	0.000521822	0	0	0	0	0.000559356	0	0	0	0	0	0	0	4.11032e-05	0	0	0	0	8.81731e-05	0	0	3.82687e-05	0	0	0	0	0	0	0	0	0	0	0	0	0	0	0	0	0	0
Otu0699	Bdellovibrio	0	0	0.000235724	0	0	0	0	2.9967e-05	0	0	0	0	0	0	0	0	0	0	0	7.68462e-05	0	0	0	0	0	0	0	0	0	0	0	0	0	0	0	0	0	0	0	0	0	0	0	0	0	0	0	0
Otu0700	Unclassified Alphaproteobacteria	0	5.97729e-05	0	0.000132328	0.000336852	5.51785e-05	0	5.99341e-05	0.00028463	0	0	0	9.081e-05	4.30274e-05	0	0.000185606	0	6.4539e-05	0	0	0	0	0	0	2.91715e-05	0	0	0	0	0	0	0	0	0	0	0	0	0	0	0	0	0	0	0	4.71209e-05	0	0	0
Otu0701	Unclassified Bacteroidetes	0	0	0	0	0	0	0	0	0	0	0	2.93574e-05	0	0	0	0	0	0	0	0	0	0	0	0	0	0	0	0	0	0	0	2.95561e-05	0	0	0	0	0	0	0	0	0	0	0	0	0	0	0	0
Otu0702	Unclassified Rhodocyclaceae	0.000507357	0.000119546	0.000117862	0.000264655	0	0	0	0.00134852	0.000237192	0.000163116	0	2.93574e-05	0	0	0	0	0.000155027	0	0	5.12308e-05	0.000111167	8.22064e-05	0	3.97931e-05	0	0	0	0	0.000198267	0	0	0	0	0	0	0	0	0	0	0	0	0	2.17699e-05	0	0	0	0	0
Otu0703	Pseudoxanthomonas	0.000253678	0	0	0	0	0.000165536	8.97666e-05	0	0.000332068	0	0	0	0	0	0.000152099	0	0	6.4539e-05	0	0.000333	0	0	0	0	0	0	0	0	0	0	0	0	0	0	0	0	0	0	0	0	0	0	0	0	0	0	0	0
Otu0704	Ilumatobacter	0	0.000179319	0	6.61638e-05	0	0	0	0.000149835	0	0	0	0	0	0	0	0	0	3.22695e-05	0	0	0	0	0	0	0	0	0	2.83567e-05	0	0	0	2.95561e-05	0	0	0	0	0	0	0	0	0	0	4.35398e-05	0	0	3.51704e-05	0	0
Otu0705	Gp3	0	0	0.000648241	0.000264655	0	0	0.000179533	0.000119868	0.000189753	0	0	0.000440361	9.081e-05	0.000258164	0	0.000139205	0	3.22695e-05	0	0	0	4.11032e-05	0	3.97931e-05	0	0	0	0	0	0	0	0	0	0	0	0	0	0	0	0	0	0	0	0	0	0	0	0
Otu0706	3_genus_incertae_sedis	0	0	0	0	0	0	0	0	0	0	0	0	0	0	0	0	0	0	0	0	0	0	0	0	0	0	0	0	0	0	0	0	0	0	0	0	0	0	0	0	0	0	0	0	0	0	0	0
Otu0707	Unclassified Bacteria	0	0	0	0	0	0	0	5.99341e-05	0	0	0	0	0	0	0	0	0	0	0	0	0	0	0	0	0	0	0.000205737	2.83567e-05	0	0	0	0	6.19214e-05	0	0	0	0	0	0	0	0	0	0	0	0	0	0	0
Otu0708	Unclassified Bacteria	0	0	0.000117862	0	0	0	0	0	0	0	0	2.93574e-05	0	4.30274e-05	0	0	0	0	0	0	0	0	0	0	0	0	0	0	0	0	0	0	0	0	0	0	0	0	0	0	0	0	0	0	0	0	0	0
Otu0709	Unclassified Alphaproteobacteria	0	0	0	0.000198491	0	0	0	2.9967e-05	0	0	5.75341e-05	0	0	0	0	0	0	0	0	0	0	0	0	7.95862e-05	0	0	0	0	0	0	0	0	0	0	0	0	0	0	0	0	0	0	0	0	0	0	0	0
Otu0710	Unclassified Bacteria	0	0	0	0	0	0	0	0	0	0	0	0	0	0	0	0	0	0	0	0	0	0	0	0	0	0	0	0	0	0	0	0	0	0	0	0	0	0	0	0	0	0	0	0	0	0	0	0
Otu0711	Unclassified Bacteria	0	0.000298864	0	0	0	0	0	0	0	0	0	0	0	0	0	0	0	0	0	0	0	0	0	0	0	0	0	2.83567e-05	0	0	0.000235793	0	0	0	0	0	0	0	0	0	0	0	0	0	0	0	0	0
Otu0712	Unclassified Bacteria	0	0	5.8931e-05	0	0	0	0	0	0	0	0	0	0	0	0	0	0	0	0	0	2.77917e-05	8.22064e-05	0	0	0	0	0	0	0	0	0	0	0	2.88517e-05	0	0	0	0	0	0	0	0	0	0	0	0	0	0
Otu0713	Bdellovibrio	0	0	0.000176793	0	0	0	0	0	0	0	0	0	0	0	0	0	0	0	0	0.000845309	0	0	0	0	0	0	0	0	0	0	0	0	0	0	0	0	0	0	0	0	0	0	0	0	0	0	0	0
Otu0714	Unclassified Proteobacteria	0	0	0	0	0	0	0	0	0	0	0	0	0	0	0	0	0	0	0	0	0	0	0	0	0	0	0	0	0	0	0	0	0	0	0	5.69039e-05	0	0	0	0	0	0	4.35398e-05	0	0	0	0	0
Otu0715	Unclassified Bacteria	0	0.000298864	0.000766103	0	0	0	0.000179533	2.9967e-05	0	0	0	0.000117429	0.00024216	0	0	0	0	0	0	0	2.77917e-05	0	0	0	0	0	0	0	2.83238e-05	0	0	0	0.000123843	0	0	0	0	0	0	0	0	0	0	0	0	0	0	0
Otu0716	Novosphingobium	0	0	0.000176793	0	0	0	0	5.99341e-05	0	0	0	0	0	0.000387247	0	0	0	0	0	0	0	8.22064e-05	0	0	0	6.26645e-05	0	0	0	0	0	0	0	2.88517e-05	0	0	0	0	0	0	0	0	0	0	0	0	0	0
Otu0717	Rothia	0	0	0	0	0	0	8.97666e-05	0	0	0	0	0	0	0	0	0	0	0	0	0	0	0	0	0	0	0	0	0	0	0	0	0	0	0	0	0	0	0	0	0	0	0	0	0	4.71209e-05	0	0	0
Otu0718	Gp16	0	0	0	0	0	0	0	0	0	0	0	0	0	0	0	0	0	6.4539e-05	0	0.000128077	0	0	0	0	0	0	0	0	0	3.82687e-05	0	0	0	0	0	0	0	0	0	0	0	0	0	0	0	0	0	0
Otu0719	OD1_genus_incertae_sedis	0	0	0.000294655	0	0	0	0.0002693	8.99011e-05	0	0	0	0.000322931	0	0	0.000101399	0	0	0	0	0	2.77917e-05	8.22064e-05	4.02156e-05	0	0	0	0	0	0	0.000114806	0	0	0	0	0	0	0	0	0	0	0	0	0	0	0	0	0	0
Otu0720	Unclassified Cryomorphaceae	0	0	0	0	0	0	0	0	0	0	0	0	0	0	0	0	0	0	0	0	0	0	0	0	0	0	0	0	0	0	0	0	0	0	0	0	0	0	0	0	0	0	0	0.000104105	9.42418e-05	0	8.75836e-05	0
Otu0721	Unclassified Comamonadaceae	0	0	0	0	0	0	0	0	0	0	5.75341e-05	0	0	0	0	0	0	0	0	0	0	0	0	0	2.91715e-05	0	2.9391e-05	0	0	0	0	0	0	0	0	0	0	0	0	0	0	0	0	0	0	0	0	0
Otu0722	Unclassified Cystobacteraceae	0	0	0	0	0	0	0	0	0	0	5.75341e-05	0	0	0	0	0	0	0	0.0026598	0.000128077	0	0	0	0	0	0	0	0	0	0	0	0	0	0	0	0	0	0	0	0	0	0	0	0	0	0	0	0
Otu0723	Unclassified Betaproteobacteria	0	0	0	0	0	0	0	0	0	0	0	0	0	0	0	0	0	0	0	0	5.55833e-05	0	0	0	0	0	0	0	0	0	0	0	0	0	0	0	0	0	0	4.0085e-05	0	0	2.17699e-05	0	0	0	0	0
Otu0724	Unclassified Gammaproteobacteria	0	0	0	0	0	0	0	0	0	0	0	0	0	0	0	0	0	0	0	0	0	0	0	0	0	0	0	0	0	0	0	0	0	0	0	0	0	0	0	0	1.93211e-05	0	0	0	0	0	0	0
Otu0725	Unclassified Bacteroidetes	0.000169119	0	0	0	0.000336852	0	0	0	0.000521822	0	0.000431506	0	3.027e-05	0	0.000152099	9.28031e-05	0.000155027	6.4539e-05	0	7.68462e-05	2.77917e-05	4.11032e-05	0	0	0	0	0.000117564	0	0	0	0.000117897	0	0	0	0	0	0	0	0	0	0	0	0	0	0	0	0	0
Otu0726	Porphyromonas	0	0	0	0	0	0	0.000179533	0	0	0	0	0	0	0	0	0	0	0	0	0	0	0	0	0	0	0	0	0	0	0	0	0	0	0	0	2.84519e-05	0	0	0	0	0	0	0	0	0	0	0	0
Otu0727	Unclassified Alphaproteobacteria	0	0.000179319	0	0	0.000898271	0.000165536	8.97666e-05	8.99011e-05	0.000379507	0	0	0	0	0	5.06997e-05	4.64016e-05	0	0	0	0	0	0	0	0	0	0	5.8782e-05	0	0.000311562	0	0	0	0	0	6.71141e-05	0	0	0	0	8.017e-05	0	0	0	0	0	0	0	0
Otu0728	Gemmatimonas	0	0.000119546	0	0	0	0.000331071	0	2.9967e-05	0	0	2.8767e-05	0	0	4.30274e-05	0	0	0	0	0	0	0	0	0	0	0	0	0	0.000198497	0	0	0	0	0	5.77034e-05	0	0	6.84932e-05	0	0	0	0	0	2.17699e-05	0	0	0	0	0
Otu0729	Unclassified Bacteria	0	0	0	0	0	0	0	2.9967e-05	0	0	0	0	0	0	0	0	0	0	0	0	0	0	0	0	2.91715e-05	0	0	0	0	0	7.85978e-05	0	0	0	0	0	0	0	0	0	0	0	0	0	0	0	0	0
Otu0730	Peredibacter	0	0	0	0	0	0.000275893	0	0.000419539	0.000189753	0	0.000115068	0	0	0	0	0	0	0	0	0	2.77917e-05	0	0	0	2.91715e-05	0	0	0	0	0	0	0	0	0	0	0	0	0	0	0	0	0	0	0	0	0	0	0
Otu0731	Bdellovibrio	0	0	0.000530379	0.000132328	0	0	0	5.99341e-05	0.000189753	0	5.75341e-05	0	0	4.30274e-05	0	0	0	6.4539e-05	0.000111991	0.000102462	0	0	0	0.000119379	0	0	0	0	0	0	0	0	0	0	0	0	0	0	0	0	0	0	0	0	0	0	0	0
Otu0732	Spartobacteria_genera_incertae_sedis	0	0	0	0	0	0	0	0	0	0	0	0	0	0	0	0	0	0	0	0	0	0	0	0	0	0	0	0	0	0	0	0	0	0	0	0	0	0	0	0	0	0	0	0	0	0	0	0
Otu0733	Unclassified Xanthomonadaceae	0	0	0	0	0	0	0	0	0	0	0	0	0	0	0	0	0	0	0	0	0	0	0	0	0	0	0	0	0	0	0	0	0	0	0	0	0	0	0	0	0	0	0	0	0	0	0	0
Otu0734	Unclassified Alphaproteobacteria	0	0	0	0	0	0	0	0	0	0	0	0	0	0	0	0	0	0	0	0	0	0	0	0	0	0	0	0	0	0	0	0	0	0	0	0	0	0	0	0	0	0	0	0	0	0	0	0
Otu0735	Sphingomonas	0	0	0	0	0	0.000331071	0.000359066	0	0	0	0	5.87147e-05	0	0	0	0	0	0	0	0	0	8.22064e-05	0	0	0	0	0	0	0	0	7.85978e-05	0	0	0	0	0	0	0	0	0	0	0	0	0	0	0	0	0
Otu0736	Unclassified Rhizobiales	0	0	0	0	0	0	0	0	0	0	0	0	0	0	0	0	0	0	0	0	0	0	0	0	0	0	0	0	0	0	0	0	0	0	0	0	0	0	0	0	0	0	0	0	0	0	0	0
Otu0737	Unclassified Sphingomonadaceae	0	0.000179319	0	0	0	0	0	2.9967e-05	0	0	0	0	0	0	0	4.64016e-05	0	0	0	0	0	0	0	0	0	0	0	0	0	0	0	0	0	0	0	0	0	0	0	0	0	0	0	0	0	0	0	0
Otu0738	Bdellovibrio	0	0	0	0	0	0	0	0	0	0	5.75341e-05	0	0	0	0	0	0	0	0	7.68462e-05	0	8.22064e-05	0	0	0	0	0	0	0	0	0	8.86682e-05	0	0	0	0	0	0	0	0	0	0	0	0	0	0	0	0
Otu0739	Unclassified Betaproteobacteria	0	0	0	0	0	0	0	0	0	0	0	0	0	0	0.000101399	0	0	0	0	0	0	0	0	0	0	0	0	0	0	0	0	0	9.28821e-05	0	0	0	0	0	0	0	0	0	0	0	0	0	0	0
Otu0740	Unclassified Bacteria	0	0	0	0	0	0	0	0	0	0	0	0	0	0	0	0	0	0	0	0	0	4.11032e-05	0	0.000119379	0	0	0	0	0	0	0	0	0	0	0	0	0	0	0	0	0	0	0	0	0	0	0	2.83503e-05
Otu0741	Bosea	0	0	0	0	0	0	0	0	0	0	0	0	0	4.30274e-05	0	0	0	0	0	0	0	0	0	0	0	0	0	0	0	0	0	0	0	0	0	0	0	0	0	0	0	0	0	6.94035e-05	9.42418e-05	0	0	0
Otu0742	Unclassified Parachlamydiaceae	0	0	5.8931e-05	0.000198491	0	0	0	0	0	0	0	0	0	0	0	0	0	0	0	0	0	0	0	0	0	0	0	0	0	0	0	0	0	0	0	0	0	0	0	0	0	0	0	0	0	0	0	0
Otu0743	Fusobacterium	8.45594e-05	0	0	0	0	0	0	0	0	0	0	0	0	0	0	0	0	0	0	0	0	0	0	0	0	0	0	0	0	0	0	0	0	5.77034e-05	0	0	0	0	0	0	0	0	0	0	0	3.51704e-05	0	0
Otu0744	Unclassified Bacteria	0	0	0.000176793	0.000198491	0	0	0	0.000269703	0	0.000195739	0	0.000205502	0.00021189	0	0.000253498	0	0	0	0	0	0	0	0	0	0	0	0	5.67135e-05	0	0	0	0	0	0	0.000100671	0	6.84932e-05	0	0	0	0	0	0	0	0	0	0	0
Otu0745	Unclassified Bacteroidetes	0	0	0	0	0	0	0.0002693	0	0	0	0	0	0	0	0	0	0	0	0	0	0	0	0	0	0	0	0	0	0	0	0.000157196	0	0	0	0	0	0	0	0	0	0	0	0	0	0	0	0	0
Otu0746	Unclassified Bradyrhizobiaceae	0	0	0	0	0	0	0	0	0	0	0	0	0	0	0	0	0	0.000225887	0	0	0	4.11032e-05	0	0	0	0	0	0	0	0	0	0	0	0	0	0	0	0	0	0	0	0	0	0	0	0	0	0
Otu0747	Unclassified Bacteroidetes	0	0.000119546	0.000176793	0.000463147	0	0.000275893	0.000179533	0.000119868	9.48767e-05	0.000293609	2.8767e-05	5.87147e-05	0	0.000258164	0.000253498	0.000185606	0.00011627	3.22695e-05	0	0	0.000138958	0.00012331	0.000201078	0	0	0	0	8.50702e-05	0	0.000114806	0	0	0.000650175	0	0	0	0	0	0	0	0	0	4.35398e-05	0	0	0	0	0
Otu0748	Sphingopyxis	0	0	0	0	0	0	0	0	0	9.78697e-05	0	0	0	0	0	0	0	0	0	0	0	0	0	0	0	0	0	5.67135e-05	0	7.65374e-05	0	0	0	0	0	0	0	0	0	0	0	0	0	0	0	0	0	0
Otu0749	Gp1	0	0	0	0	0	0	0	0	0	0	0	0	0	0	0	0	0	0	0	0	0	0	0	0	0	0	0	0	0	0	0	0	0	0	0	0	0	0	0	0	0	0	0	0	0	0	0	0
Otu0750	Unclassified Planococcaceae	0	0	0.000117862	0	0	0	0	0	0	0	0	0	0	0	0	0	0	0	0	0	0	0	0	0	0	0	0	0	0	0	0	0	0	0	0	0	0	0	0	0	0	0	0	0	0	0	0	0
Otu0751	Unclassified Bacteria	0	0	0.000117862	0	0	0	0	0	0	0	0	0	0	0	0	0	0	0	0	0	2.77917e-05	0	0	0	0	0	0	0	0	0	0	0	0	0	0	0	0	0	0	0	0	0	0	0	0	0	0	0
Otu0752	Bdellovibrio	0	0	0	0	0	0	0	0	0	0	0	2.93574e-05	0	0	0	0	3.87567e-05	0	0	0	0	0	0	0	0	0	0	0	0	0	0	0	0	0	0	0	0	0	0	0	0	0	0	0	0	0	0	0
Otu0753	Unclassified Bacteroidetes	0	0	0	0	0	0	0	0	0	0	0	0	0	0	0	0	0	0	0	0	0	0	0	0	0	0	0.000117564	0	0	0	0	0	0	0	0	0	0	0	0	0	0	0	0	0	0	0	0	0
Otu0754	Unclassified Bacteroidetes	0	0	0	0	0	0	0	0	0	0	0	0	0	4.30274e-05	0	9.28031e-05	0	0	0	0	0	0	0	0	0	0	0	0	0	0	0	0	0	0	0	0	0	0	0	0	0	0	0	0	0	0	0	0
Otu0755	Unclassified Bacteria	0	0	5.8931e-05	0	0	0	0	0	0	3.26232e-05	0	0	0	0	0	0	0	0	0	0	0	0	0	0	0	0	0	0	0	0	0	0	0	0	0	0	0	0	0	0	0	0	0	0	0	0	0	0
Otu0756	Unclassified Firmicutes	0	0	0.000176793	0	0	0	0	0	0	0	0	0	0	0	0	0	0	0	0	0	0	0	0	0	0	0	0	0	0	0	7.85978e-05	0	0	0	0	0	0	0	0	0	0	0	0	0	0	0	0	0
Otu0757	Unclassified Bacteroidetes	0	0	5.8931e-05	0	0	0	0	0	0	0	0	0	0	0	0.000152099	0	0	0	0	0	0	0	0	0	0	0	0	0	0	0	0	0	0	0	0	0	0	0	0	0	0	0	0	0	0	0	0	0
Otu0758	Unclassified Proteobacteria	0	0	0.000176793	0	0	0	0	0	0	0	0	0	0	0	0	0	0	0	0	0	0	4.11032e-05	0	0	0	0	0	0	0	0	0	0	0	0	0	0	0	0	0	0	0	0	0	0	0	0	0	0
Otu0759	Unclassified Sphingomonadales	0	0	0	0	0	0	0	0	0	0	0	0	0	0	0	0	0	0	0	0	0	0	0	0	0	0	0	0	5.66476e-05	0	3.92989e-05	0	0	0	0	0	0	0	0	0	0	0	0	0	0	0	0	0
Otu0760	Unclassified Bacteria	0	5.97729e-05	0	0	0	0	0	0	0	0	0	0	0	0	0	0	0	0	0	0	0	0	0	0	0	0	0	0	0	0	0	0	0	0	0	0	0	0	0	0	0	2.5503e-05	0	0	0	0	0	0
Otu0761	Unclassified Bacteria	0	0	0	0	0	0	0	0	0	0.00104394	0.000373972	0.000499075	0.00078702	0	0	0	0	0	0	0	0	0	0	0	0	0	0	0	0	0	0	0	0	0	0	0	0	0	0	0	0	0	0	0	0	0	0	0
Otu0762	Desulfovibrio	0	0	0	6.61638e-05	0	0	0	0	0	0	0	0	0	0	0	0	0	0	0	0	0	0	0	0	0	0	0	0	0	0	0	0	0	0	0	0	0	3.1346e-05	0	0	0	0	0	0	0	0	0	0
Otu0763	Butyricicoccus	0	0	0	0	0	0	0	0	0	3.26232e-05	0	0	0	0	0	0	0	0	0	0	0	0	0	0	0	3.13322e-05	0	0	0	0	0	0	0	0	0	0	0	0	0	0	0	0	0	0	0	0	0	0
Otu0764	Trichococcus	0.000253678	0	5.8931e-05	0	0	0	0	0	0	0	0	0	0	0	0	0	0	0	0	0	0	0	0	0	0	0	0	0	0	0	0	0	0	0	0	0	0	0	0	0	3.86421e-05	0	0	0	0	0	0	0
Otu0765	Unclassified Bacteria	0	0	0	0	0	0	0	0	0	0	0	0	0	0	0	0	0	0	0	0	0	0	0	0	0	0	0	0	0	0	0	0	0	0	0	0	0	0	0	0	0	0	0	0	0	0	0	0
Otu0766	Unclassified Bacteria	0	0.000119546	0.000176793	0	0	0	0.000179533	0	0	0	0	0	0	0	0	0	0	0	0	0	2.77917e-05	0	0	0	0	0	0	0	0	0	0	0	0	0	0	0	0	0	0	0	0	0	0	0	0	0	0	0
Otu0767	Unclassified Bacteria	0	0	0.000235724	0	0	0.000110357	0	0.000149835	0	0	0	0	0	0	0	0	0	0	0	0	0	0	0	7.95862e-05	0.000175029	0	0	0	0	0	0	0	0	0	0	0	0	0	0	0	0	0	0	0	0	0	0	0
Otu0768	Unclassified Bacteria	0	0	0	0	0	0	0	0	0	0	0	0	6.054e-05	0	0	0	0	0	0	0	0	0	0	0	0	0	0	0	0	0.000153075	0	0	0	0	0	0	0	0	0	0	0	0	0	0	0	0	0	0
Otu0769	Unclassified Bacteria	0	0	0	0	0	0	0	0	0	0	2.8767e-05	0	0	0	0	0	0	0	0	0	0	0	0	0	0	0	0	0	0	0	0	0	0	0	3.3557e-05	0	0	0	0	0	0	0	0	0	0	0	0	0
Otu0770	Unclassified Proteobacteria	0	0	0	0	0	0	0	0	0	0	0	0	0	0	0	0	0	0	0	0	0	0	0	0	2.91715e-05	0	0	0	0	0	0	0	0	0	0	0	0	3.1346e-05	0	0	0	0	0	0	0	0	0	0
Otu0771	Unclassified Alphaproteobacteria	0	0	0	0	0	0	0	0	0	0	0	0	0	0	0	0	3.87567e-05	0	0	0	0	0	0	0	0	0	0	0	5.66476e-05	0	0	0	0	0	0	0	0	0	0	0	0	0	0	0	0	0	0	0
Otu0772	Unclassified Proteobacteria	0	5.97729e-05	0	0	0	0	0	0	0	0	0	0	0	0	0	0	0	0	0	0	0	0	0	0	0	0	0	0	0	0	0	0	0	0	0	0	0	0	0	0	0	0	0	0	0	0	0	0
Otu0773	Bdellovibrio	0	0	0.000471448	0	0	0	0	0	0	0	0	5.87147e-05	0	0	0	0	0	0	0	0	0	4.11032e-05	0	0	8.75146e-05	0	0	0	0.000113295	0	0	0	0	0	0	0	0	0	0	0	0	0	0	0	0	0	0	0
Otu0774	Unclassified Bacteroidetes	0	0	0	0	0	0	0	0	0	0	0	0	0	0	0	0	0	0	0	0	0	0	0	0	0	0	0	0	0	0	0	0	0	0	0	0	0	0	0	0	0	0	0	0	0	0	0	0
Otu0775	Unclassified Burkholderiales	0	5.97729e-05	0.000294655	0	0	0	8.97666e-05	0	0.000521822	0.000195739	0	5.87147e-05	0	8.60548e-05	0	9.28031e-05	0	0	0	0.000204923	5.55833e-05	4.11032e-05	0	0	0	0	5.8782e-05	0	0	0.000191344	3.92989e-05	0	0	0	0	0	0	0	0	0	0	0	0	0	0	0	0	0
Otu0776	Unclassified Chitinophagaceae	0	0	0	0	0	0	0	0	0	0	0	0	0	0	0	0	0	0	0	0	0	0	0	0	0	0	0	0	0	0	0	0	0	0	0	0	0	0	0	0	0	0	0	0	0	0	0	0
Otu0777	Polynucleobacter	0	0	0	0	0	0	8.97666e-05	2.9967e-05	0	0	0	0	0	0	0	0	0	0	0	0	5.55833e-05	0	0	0	0	0	0	0	0	0	0	0	0	0	0	0	0	0	0	0	0	0	0	3.47017e-05	0	0	0	0
Otu0778	Unclassified Myxococcales	0	0	0	0	0.000336852	0	0.000179533	0	0	0	0	2.93574e-05	0	0	0	0	0	0	0	0	2.77917e-05	0	0	0	0	0	0	0	0	3.82687e-05	7.85978e-05	0	0	0	0	0	0	0	0	0	0	0	0	0	0	0	0	0
Otu0779	Unclassified Bacteria	0.000507357	5.97729e-05	0	0	0	0	0	0	0	0	0	0	0	4.30274e-05	0	0	0	0	0	0	0	0	0	0	0	0	0	0	0	0	0	0	0	0	0	0	0	0	0	0	0	0	0	0	0	0	0	0
Otu0780	Barnesiella	0	5.97729e-05	0	0	0	0	0	0	0	0	0	0	0	0	0	0	0	0	0	0	0	0	0	0	0	0	0	0	0	0	0	0	0	0	0	0	3.42466e-05	0	0	0	0	0	0	0	0	0	0	0
Otu0781	Unclassified Lachnospiraceae	0	0	0	0	0	0	0	0	0	0	0	0	0	0	0	0	0	0	0	0	0	0	0	0	0	0	0	0	0	0	0	0	0	0	0	0	0	0	0	0	0	0	0	0	0	0	0	0
Otu0782	Cellvibrio	0	0	0	0	0	0	0	0	0	0	0	0	0	0	0	4.64016e-05	0	0	0	5.12308e-05	0	0	0	0	0	0	0	0	0	0	0	0	0	0	0	0	0	0	0	0	0	0	0	0	0	0	0	0
Otu0783	OD1_genus_incertae_sedis	0	0	0	0	0	0	0	0.000149835	0	0	0	0	0	0	0	0	0	0	0	0	0	0	0	0	0	0	0	0	0	0	0	0	0	0	0	0	0	0	0	0	0	0	0	0	0	0	0	0
Otu0784	Unclassified Myxococcales	0	0	0	0	0	0	0	0	0	0	0	0	0	0	0	0	0	0	0	0	0	0	0	0	0	0	0	0	0	0	0	0	0	0	0	0	0	0	0	0	0	0	0	0	0	0	0	0
Otu0785	Unclassified Bacteria	0	0	0	0.000132328	0	0	0	0	0	0	0	0	0	0	5.06997e-05	0	0	0	0	0	0	0	0	0	0	0	0	0	0	0	0	0	0	0	0	0	0	0	0	0	0	0	0	0	0	0	0	0
Otu0786	Phenylobacterium	0	0	0	0	0	0	0	0	0	0	0	0	0	0	0	0	0	0	0	0	0	0	0	0	0	0	0	0	0	0	7.85978e-05	0	0	0	0	0	0	0	0	0	0	0	0	3.47017e-05	0	0	0	0
Otu0787	Unclassified Betaproteobacteria	0	0	0	0	0	0	0	0	0	0	0	0	0	0	0	0	0	0	0	0	0	0	0	0	0	0	0	0	0	0	0	0	0	0	0	0	0	0	0	0	0	0	0	0	0	0	0	0
Otu0788	Roseomonas	0	0	0	0	0	0	0	0	0	0	0	2.93574e-05	0	0	0	0	0	0	0	0	0	0	0	0	0	0	0	0	2.83238e-05	0	0	0	0	0	0	0	0	0	0	0	0	0	0	0	0	0	0	0
Otu0789	Unclassified Bacteria	0	0	0.000117862	0	0	0	0	2.9967e-05	0	0	0	0	0	0	0	0	0	0	0	0	0	0	0	0	0	0	5.8782e-05	0	0	0	0	0	0	0	0	0	0	0	0	0	0	0	0	0	0	0	0	0
Otu0790	Unclassified Burkholderiales	0	0	0	0	0	0	0	0	0	0	2.8767e-05	0	0	0	5.06997e-05	0	0	0	0	0	0	0	0	0	0	0	0	0	0	0	0	0	0	0	0	0	0	0	0	0	0	0	0	0	0	0	0	0
Otu0791	Gp1	0	0	0	0	0	0	0	0	0	0	0	0	0	0	0	0	0	0	0	0	0	0	0	0	0	0	0	0	0	0	0	0	0	0	0	0	0	0	0	0	0	0	0	0	0	0	0	0
Otu0792	Actinomyces	0	0	0	0	0	0	0	0	4.74383e-05	0	0	0	0	0	0	0	0	0	0	0	0	0	0	0	0	0	0	0	0	0	0	0	0	0	0	0	0	0	0	0	0	0	0	0	0	0	0	0
Otu0793	Sphingomonas	0	0	0	0	0	0	0	0	0	0	0	0	0	0	0	0	0	0	0	0	0	0	0	0	0	0	8.81731e-05	0	0	3.82687e-05	0	0	0	0	0	0	0	0	0	0	0	0	0	0	0	0	0	0
Otu0794	Unclassified Alphaproteobacteria	0	0	0	0	0	0	0.0005386	0	0	0.000391479	0	0	0	0	0	9.28031e-05	0	0	0	0	0	0	0	0	0	0	0	0.00017014	0	0	0	0	0	0	0	0	0	0	0	0	0	0	6.53097e-05	0	0	0	0	0
Otu0795	Unclassified Porphyromonadaceae	0	0	0	0	0	0	0	0	0	3.26232e-05	0	0	0	0	0	0	0	0	0	0	0	0	4.02156e-05	0	0	0	0	0	0	0	0	0	0	0	0	0	0	0	0	0	0	0	0	0	0	0	0	0
Otu0796	Unclassified Sphingomonadales	0	0	0	0	0	0	0	0	0	0	0	5.87147e-05	0	0	0	0	0	0	0	0	0	0	0	0	0	0	0	0	0	0	0	0	3.09607e-05	0	0	0	0	0	0	0	0	0	0	0	0	0	0	0
Otu0797	Unclassified Betaproteobacteria	0	0	0	0	0	0.000110357	0	0.000179802	0	0	0	0	0	0	0	0	0	0	0	0	0	0	0	0	0	0	0	0	0	0	0	0	0	0	0	0	0	0	0	0	0	0	0	0	0	0	0	0
Otu0798	Gp4	0	0	0	0	0	0	0	2.9967e-05	9.48767e-05	0	0	0	0	0	0	0	0	0	0	0	0	0	0	0	0	0	0	0	0	0	0	0	0	0	0	0	0	0	0	0	0	0	0	0	0	0	0	0
Otu0799	Geobacter	0	0.000119546	0	0	0	0	0	0	0	0	2.8767e-05	0	0	0	0	0	0	0	0	0	0	0	0	0	0.000291715	0	0	0	0	0	0	0	0	0	0	0	0	0	0	0	0	0	0	0	0	0	0	0
Otu0800	Spartobacteria_genera_incertae_sedis	0	0	0	0	0	0	0	0	0	0	0	0	0	0	0	0	0	0	0	0	0	0	0	0	0	0	0	0	0	0	0	0	0	0	0	0	0	0	0	0	0	0	0	0	0	0	0	0
Otu0801	Unclassified Bacteria	0	0.000119546	0	0	0	0	0	0	0	0	0	0	0	0	0	0	0	0	0	0	0	0	0	0	0	0	0	0	0	0	0	0	0	0	0	0	0	0	0	0	0	0	4.35398e-05	0	0	0	0	0
Otu0802	Unclassified Bacteria	0	0	0	0	0	0	0	0	0	0	0	0	0	0	0	0	0	0	0	0	0	0	0	0	0	0	0	0	0	0	0	0	0	0	0	0	0	0	3.03582e-05	0	0	0	0	0	0	0	2.91945e-05	0
Otu0803	Spartobacteria_genera_incertae_sedis	0	0	0	0	0	0	0	0	0	0	0	0	0	0	0	0	0	0	0	0	0	0	0	0	0	0	0	0	0	0	0	0	0	0	0	0	0	0	0	0	0	0	0	0	0	0	0	0
Otu0804	Aerococcus	0	0	0	0	0	0	0	0	0	0	0	0	0	0	0	0	0	0	0	0	0	0	0	0	2.91715e-05	0	0	0	0	0	0	0	3.09607e-05	0	0	0	0	0	0	0	0	0	0	0	0	0	0	0
Otu0805	Unclassified Alphaproteobacteria	0	5.97729e-05	0.000117862	0	0	0	0	0	0	0	0	0	0	0	0	0	0	0	0	0	0	0	0	0	0	0	0	0	0	0	0	0	0	0	0	0	0	0	0	0	0	0	0	0	0	0	0	0
Otu0806	OD1_genus_incertae_sedis	0	0	5.8931e-05	0	0	0	0	5.99341e-05	0	0	0	0	0	0	0	0	0	0	0	0	0	0	0	0	0	0	0	0	0	0	0	0	0	0	0	0	0	0	0	0	0	0	0	0	0	0	0	0
Otu0807	Unclassified Proteobacteria	0	0	0	0	0	0	0	0	0	0	0	0	0	0	0	0	0	0	0	0	0	0	0	0	0	0	0	0	0	0	0	0	0	5.77034e-05	0	5.69039e-05	0	0	0	0	0	0	0	0	0	0	0	0
Otu0808	Gp3	0	0	0	0	0	0	0	0	0	0	0	0	0	0	0	0	0	0	0	0	0	0	0	0	0	0	0	0	0	0	0	0	0	0	0	0	0	0	0	0	0	0	0	0	0	0	0	0
Otu0809	Unclassified Planctomycetaceae	0	0	0	0	0	0	0	0	0	0	0	0	0	0	0	0	0	0	0	0	0	0	0	0	0	0	0	0	5.66476e-05	0	0	0	0	0	0	0	0	0	0	0	0	0	2.17699e-05	0	0	0	0	0
Otu0810	Unclassified Planctomycetaceae	0	0	0	0	0	0	0	0.000149835	0	0	0	0	0	0	0	0	0	0	0	0	0	0	0	0	0	0	0	0	0	0	0	0	0	0	0	0	0	0	0	0	0	0	0	0	0	0	0	0
Otu0811	Unclassified Myxococcales	0	0	0	0	0.000112284	0	0	0	0	0	0	0	0	0	0	0	7.75134e-05	0	0	0	0	0	0	0	0	0	0	0	0	0	0.000510886	0	0	0	0	0	0	0	0	0	0	0	0	0	0	0	0	0
Otu0812	Neochlamydia	0	0.000119546	0.000117862	0	0	0	0	2.9967e-05	0	0	0	0	0	4.30274e-05	0	0	0	0	0	0	0	0	0	0	0	0	0	0	0	0	0	0	0	0	0	0	0	0	0	0	0	0	0	0	0	0	0	0
Otu0813	Williamsia	0	0	0	0	0	0.000165536	0	0	0	0	0	0	0	0	0	0	0	0	0	0	0	0	0	0	0	0	2.9391e-05	0	0	0	0	0	0	0	0	0	0	0	0	0	0	0	0	0	0	0	0	0
Otu0814	Gp3	0	0	0	0	0	0	0	0	0	0	0	0	0	0	0	0	0	0	0	0	0	0	0	0	0	0	0	0	0	0	0	0	0	0	0	0	0	0	0	0	0	0	0	0	0	0	0	0
Otu0815	Unclassified Opitutae	0	0	5.8931e-05	0	0	0	0	0	0	0	0	0	0	0	0	0	7.75134e-05	0	0	0	0	0	0	0	0	0	0	0	0	0	0	0	0	0	0	0	0	0	0	0	0	0	0	0	0	0	0	0
Otu0816	Unclassified Bacteria	0	0	0	0	0	0	0	2.9967e-05	0	0	2.8767e-05	2.93574e-05	0	0	0	0	0	0	0	0	0	0	0	0	0	0	0	0	0	0	0	0	0	0	0	0	0	0	0	0	0	0	0	0	0	0	0	0
Otu0817	Unclassified Burkholderiales	0	0	0	0	0	0	0	0	0	0	0	2.93574e-05	0	0	0.000101399	0	0	0	0	0	0	0	0	0	0	0	0	0	0	0	0	0	0	0	0	0	0	0	0	0	0	0	0	0	0	0	0	0
Otu0818	Unclassified Alphaproteobacteria	0	0	0	0	0	0	0	8.99011e-05	0	0	0	0	0	0	0	0	0	3.22695e-05	0	0	0	0	0	0	0	0	0	0	0	0	0	0	0	0	0	0	0	0	0	0	0	0	0	0	0	0	0	0
Otu0819	Legionella	0	0.000119546	0	0	0	0	0.0002693	0	0	0	0	0	0	0	0	4.64016e-05	0	0	0	0	0	0	0	0	0	0	0	0	0	0	0	0	0	0	0	0	0	0	0	0	1.93211e-05	0	0	0	0	0	0	0
Otu0820	Unclassified Chlamydiales	0	0	0	0	0	0	0	0.000119868	0	0	0	0	0	0	0	0	0	0	0	0	0	0	0	0	0	0	0	0	8.49714e-05	0	0	0	0	0	0	0	0	0	0	0	0	0	0	0	0	0	0	0
Otu0821	Unclassified Bacteria	0.000507357	0.000119546	0	0	0	0	0	0	0.000379507	0	0	0	0	0	0	0	0	0	0	2.56154e-05	2.77917e-05	0	0	0	0	0	0	0	0	0	0	0	0	0	0.000134228	5.69039e-05	0	0	0	0	0	0	0	0	0	0	0	0
Otu0822	Unclassified Deltaproteobacteria	0	0	0.000235724	0	0	0	0	8.99011e-05	0	0	0	0	0	0	0	0	0	9.68085e-05	0	0	0	0	0	3.97931e-05	0	0	0	0	0	0	0	0	0	0	0	0	0	0	0	0	0	0	0	0	0	0	0	0
Otu0823	Unclassified Alphaproteobacteria	0	5.97729e-05	0	0	0	0	0	0	0	0	0	0	0	0	0	0	0	0	0	0	0	0	0	0	8.75146e-05	0	0	0	0	0	0	0	0	0	0	0	0	0	0	0	0	0	0	0	0	0	0	0
Otu0824	Gp4	0	0	0	0	0	0	0	0	0	0	0	0	0	0	0	0	0	0	0	0	0	0	8.04311e-05	0	0	0	0	2.83567e-05	0	0	0	0	0	2.88517e-05	0	0	0	0	0	0	0	0	0	0	0	0	0	0
Otu0825	Gp13	0	0	0	0	0	0	0	0	0	0	0	0	0	0	0	0	0	0	0	0	0	0	0	0	0	0	0	0	0	0	0	0	0	0	0	0	0	0	0	0	0	0	0	0	0	0	0	0
Otu0826	Unclassified Rhizobiales	0	0	0	0	0	0	0	0	0	0	0	0	0	0	0	0	0	0	0	0	0	0	0	0	0	0	0	0	0	0	0	0	0	0	0	0	0	3.1346e-05	0	0	0	0	0	6.94035e-05	0	0	0	0
Otu0827	Bosea	0	0	0	0	0	0	0	5.99341e-05	0	0	0	0	0	0	0	0	0	0	0	0	0	0	0	0	0	0	0	0	0	0	0	0	0	0	0	0	0	0	0	0	0	0	4.35398e-05	0	0	0	0	0
Otu0828	Unclassified Bacteria	0	0	0	0	0	0.000110357	0	0.000389571	0	0	0	0	0	0	0	0	7.75134e-05	0	0	0	0	0	0	0	0	0	0	0	0	0	0	0	0	5.77034e-05	0	0	0	0.000125384	0.000212508	0	0	0	0	0	0.000424088	0	0	0
Otu0829	Unclassified Rhodospirillales	0	5.97729e-05	0	0	0	0	0	0	4.74383e-05	0	0	0	0	0	0	0	0	0	0	0	0	0	0	0	0	0	0	0	0.000198267	0	0	0	0	0	0	0	0	0	0	0	0	0	0	0	0	0	0	0
Otu0830	Unclassified Bacteria	0	0	0	0	0	0	0	0.000149835	0	0	0	0	0	0	0	0	0	0	0	0	0	0	0	0	0	0	0	0	0	0	0	0	3.09607e-05	0	0	0	0	0	0	0	0	0	0	0	0	0	0	0
Otu0831	Sneathia	0	0	0	0	0	0	0	0	0	0	0	0	0	0	0	9.28031e-05	0	0	0	0	0	0	0	0	0	0	0	0	0	0	0	2.95561e-05	0	0	0	0	0	0	0	0	0	0	0	0	0	3.51704e-05	0	0
Otu0832	Unclassified Bacteroidetes	0	5.97729e-05	0	0	0	0	0	0	0	0	0	0	0	0	0	0	0	0	0	0	0	0	0	0	0	0	0	0	0	0	0	0	0	0	0	0	0	0	3.03582e-05	4.0085e-05	0	0	0	0	0	0	0	0
Otu0833	Unclassified Burkholderiales	0	0	0	0	0	0	0	0	0	0	0	0	0	0	0	0	0	0	0	0	0	0	0	0	0	0	5.8782e-05	0	0	0	0	0	0	0	0	0	0	0	0	0	0	0	0	0	0	0	0	0
Otu0834	Unclassified Betaproteobacteria	0	0	5.8931e-05	0	0	0	0	0	0	0	0	0	0	0	0	0	0	0	0	0	0	0	0	0	0	0	0	0	0	0	0	0	0	0	0	0	0	0	0	0	0	0	0	0	0	0	0	0
Otu0835	Prevotella	0	0	0	0	0	0	0	0	0.000806452	0	0	0	0	0	0	9.28031e-05	0	0	0	0	0	0	0	0	0	0	0	0	0	0	0	0	0	0	0	0	0	0	0	0	0	0	0	0	0	3.51704e-05	0	0
Otu0836	Unclassified Ktedonobacteria	0	0	0	0	0	0	0	0	0	0	0	0	0	0	0	0	0	0	0	0	0	0	0	0	0	0	0	0	0	0	0	0	0	0	0	0	0	0	0	0	0	0	0	0	0	0	0	0
Otu0837	Unclassified Proteobacteria	0	0	0	0	0	0	0	2.9967e-05	0	0	0	0	0	0	0	0	0	0	0	0	0	0	0	0	0	0	0	0	0	0	3.92989e-05	0	0	0	0	0	0	0	0	0	0	0	0	0	0	0	0	0
Otu0838	Unclassified Prevotellaceae	0	0.000298864	0	0	0	0	0.000179533	0	0	0	0	0	0	0	0	0	0	0	0	0	0	0	0	0	0	0	0	0	0	0	0	0	0	0	0	0	0	0	0	0	0	0	0	0	0	0	0	0
Otu0839	Unclassified Rhodocyclaceae	0.000676476	0	0	0	0	0	0	2.9967e-05	4.74383e-05	0	0	0	6.054e-05	0	0	0	0	0	0	0	0	0	0	0	0	0	0	0	0	0	0	0	0	0	0	0	0	0	0	0	0	0	0	0	0	0	0	0
Otu0840	OD1_genus_incertae_sedis	0	0	5.8931e-05	0	0	0.000165536	0	0	9.48767e-05	0	0	0	0	0	0	0	0	6.4539e-05	0	0	0	0	0	0	0	0	0	0	0	0	0	0	0	0	0	0	0	0	0	0	0	0	0	0	0	0	0	0
Otu0841	Unclassified Betaproteobacteria	0	0	0	0	0	0	0	0	4.74383e-05	0	0	0	0	0	0	0	0	0	0	0	0	0	0	0	0	0	0	0	0	0	0	0	0	0	0	0	0	0	0	0	0	0	0	0	0	0	0	0
Otu0842	Aquabacterium	0	0	0	0	0	0	0	0	0	0	0	0	0	0	0	0	0	0	0	0	0	0	0	0	0	0	8.81731e-05	0	0	0	0	0	0	0	0	0	0	0	0	0	0	0	0	0	0	0	0	0
Otu0843	Unclassified Bacteria	0	0	0	0	0	0	0	0	0	0	0	0	0	0	0	0	0	0	0	0	0	0	0	0	0	0	0	0	0	0	0	0	6.19214e-05	0	0	2.84519e-05	0	0	0	0	0	0	0	0	0	0	0	0
Otu0844	Methylobacter	0.00109927	0	0	0	0	0	0	2.9967e-05	0	0	0	0	0	0	0	0	0	0	0	0	0	0	0	0	0	0	0	0	0	0	0	0	0	0	0	0	0	0	0	0	0	0	0	0	0	0	0	0
Otu0845	Unclassified Bacteria	0	0	0	0	0	0	0	0	0	0	0.000172602	5.87147e-05	0	0	0	0	0	0	0	0	0	0	0	0	0	0	0	0	0	7.65374e-05	0	0	0	0	0	0	0	0	0	0	0	0	0	0	0	0	0	0
Otu0846	Unclassified Veillonellaceae	0	0	0.000294655	6.61638e-05	0	0	0	0	0	0	0	0	0	0	0	4.64016e-05	0	0	0	0	0	4.11032e-05	0	0	0	0	0	0	0	0	0	0	0	0	0	0	0	0	6.07165e-05	0	0	0	0	0	0	0	0	0
Otu0847	Conexibacter	0	0	0	0	0	0	0	0	0	0	0	0	0	0	0	0	0	0	0	0	0	0	0	0	0	0	0	0	0	7.65374e-05	0	0	0	0	0	0	0	0	0	0	0	0	0	0	0	0	0	0
Otu0848	Unclassified Actinobacteria	0	0	0	0	0	0	0	0	0	0	0	0	0	0	0	0	0	0	0	0	0	0	0	0	0	0	0	0	0	0	0	0	0	0	0	0	0	0	0	0	0	0	0	0	0	0	0	0
Otu0849	Unclassified Bacteria	0	0	0	0	0	0	0	0	0	6.52465e-05	0	0	0	0	0	0	0	0	0	0	0	0	0	0	0	0	0	0	0	0	0	0	0	0	0	0	0	0	0	0	0	0	0	0	0	0	0	2.83503e-05
Otu0850	Gp1	0	0	0	0	0	0	0	0	0	0	0	0	0	0	0	0	0	0	0	0	0	0	0	0	0	0	0	0	0	0	0	0	0	0	0	0	0	0	0	0	0	0	0	0	0	0	0	0
Otu0851	Unclassified Bacteria	0.000253678	5.97729e-05	5.8931e-05	0.000264655	0	5.51785e-05	0	2.9967e-05	0	0	0	0	0	0	0	0	0	0	0	0	0	0	0	0	0	0	0.000264519	0	0	0	0	0	0	0	0	0	0	0	0	0	0	0	0	0	0	0	0	0
Otu0852	Unclassified Bacteria	0	0	5.8931e-05	0	0	0	0	0.000209769	0	0	0	0	0	0	0	0	0	0	0	0	0	0	0	0	0	0	0	0	0	0	0	0	0	0	0	0	0	0	0	0	0	0	0	0	0	0	0	0
Otu0853	Unclassified Chloroflexi	0	0	0	0	0	0	0	0	0	0	0	0	0	0	0	0	0	0	0	0	0	0	0	0	0	0	0	0	0	0	0	0	0	0	0	0	0	0	0	0	0	0	0	0	0	0	0	0
Otu0854	Sphingopyxis	0	0	0	0	0	0	0	0	0	0	0	0	0	0	0	0	0	0	0	0	5.55833e-05	0	0	0	0	0	0	0	0	0	0	0	0	0	0	0	0	0	0	0	0	0	0	0	0	0	0	0
Otu0855	Unclassified Pseudomonadaceae	0	0	0	0	0	0	0	0	0	0	0	0	0.00021189	0	5.06997e-05	0	0	0	0	0	0	0	0	0	0	0	0	0	0	0	0	0	0	0	0	0	0	0	0	0	0	0	0	0	0	0	0	0
Otu0856	Unclassified Comamonadaceae	0	0	0	0	0	0	0	8.99011e-05	4.74383e-05	0.000130493	0	0	0	0	0	0	0	0	0	0	0	0	0	0	0	0	0	0	0	0	0	0	0	0	0	0	0	0	0	0	0	0	0	0	0	0	0	0
Otu0857	Unclassified Bacteroidetes	0	0	5.8931e-05	0	0	0	0	0	0	0	0	0.000234859	0	0	0	0	0	0	0	0	0	0	0	0	0	0	0	0	0	0	0	0	0	0	0	0	0	0	0	0	0	0	0	0	0	0	0	0
Otu0858	Unclassified Porphyromonadaceae	8.45594e-05	0	0	6.61638e-05	0	0	0	0	0	0	0	0	0	0	0	0	0	0	0	0	0	0	0	0	0	0	0	0	0	0	0	0	0	0	0	0	0	0	0	0	0	0	0	0	0	0	0	0
Otu0859	Fusobacterium	0	0.000298864	0	0	0	0	0	0	0	0	0	0	0	0	0	0	0	0	0	0	0	0	0	0	0	0	0	0	0	0	3.92989e-05	0	0	0	0	0	0	0	0	0	0	0	0	0	0	0.000105511	0	0
Otu0860	Unclassified Proteobacteria	0	0	0	0	0	0.000110357	0	0	0	0	0	0	0	0	0	0	0	0	0	0	0	0	0	0	0	0	0	0	0	0.000153075	0	0	0	0	0	0	0	0	0	0	0	0	0	0	0	0	0	0
Otu0861	Unclassified Actinomycetales	0	0	0	0	0	0	0	0	0	0	0	0	3.027e-05	0	0	0	0	0	0	0	0	0	0	0	0	0	0	0	0	0	7.85978e-05	0	0	0	0	0	0	0	0	0	0	0	0	0	0	0	0	0
Otu0862	Unclassified Bacteria	0	0	0	0	0	0	0	0	0	0	8.63011e-05	0	0	0	0	0	0	0	0	0	0	0	0	0	0	0	0	0	0	0	0	0	0	0	0	0	0	0	0	0	0	0	0	0	0	0	0	0
Otu0863	Bosea	0	0	0.000117862	0	0	0	0	0	0	0	0	0	0	0	0	0	0	0	0	0	0	4.11032e-05	0	0	0	0	0	0	0	0	0	0	0	0	0	0	0	0	0	0	0	0	0	0	0	0	0	0
Otu0864	Unclassified Alphaproteobacteria	0	0	0	0	0	0	0	0	0	0	0	0	0	0	0	0	0.00011627	0	0	0	0	0	0	0	0	0	0	0	0	0	0	0	0	0	0	0	0	0	0	0	0	0	0	0	0	0	0	0
Otu0865	Flavobacterium	0	0	0	0	0	0.000110357	0	0	0	0	2.8767e-05	0	0	0	0	0	0	0	0	0	0	0	0	0	0	0	0	0	0	0	0	0	0	0	0	0	0	0	0	0	0	0	0	0	0	0	0	0
Otu0866	Singulisphaera	0	5.97729e-05	0	0	0	0	0	0	0	0	0	0	0	0	0	0	0	0	0	0	0	0	0	0	0	0	0	0	0	0	0	0	0	0	0	0	0	0	3.03582e-05	0	0	0	0	0	0	0	0	0
Otu0867	Unclassified Bacteroidetes	0	0	0	0	0	5.51785e-05	0	0	0	0	0	0	0	0	0	0	0	0	0	5.12308e-05	0	0	0	0	0	0	0	0	0	0	0	0	0	0	0	0	0	0	0	0	0	0	0	0	0	0	0	0
Otu0868	Unclassified Xanthomonadaceae	0	0	0	0	0	0	0	0	0	0	0	0	0	0	0	0	0	0	0	0	0	0	0	0	0	0	0	0	0	0	0	0	0	0	0	0	0	0	0	0	0	0	0	0	0	0	0	0
Otu0869	Unclassified Rhodospirillales	0	0	0	0	0	0	0	5.99341e-05	0	0	0	0	0	0	0	0	7.75134e-05	0	0	0	0	0	0	0	0	0	0	0	0	0	0	0	0	0	0	0	0	0	0	0	0	0	0	0	0	0	0	0
Otu0870	Legionella	0	0	0	0	0	0	0	5.99341e-05	0	0	0	0	0	0	0	0	0	0	0	0	0	0	0	0	0	0	0	0	0	0	0	0	0	0	0	0	0	0	0	0	0	0	6.53097e-05	0	0	0	0	0
Otu0871	Unclassified Chlamydiales	0	0	0	0	0	0	0	0	0	0	0	0	0	0	5.06997e-05	0	0	0	0	0.000230539	0	0	0	0	0	0	0	0	0	0	0	0	0	0	0	0	0	0	0	0	0	0	0	0	0	0	0	0
Otu0872	Arcobacter	0	0	0	0.000132328	0	0	0	0	0	0	0	0	0	0	0	0	0	0	0	0	0	0	0	0	0	0	0	0	0	0	0	0	0	0	0	0	0	0	0	0	0	0	0	0	0	0	0	0
Otu0873	Unclassified Gammaproteobacteria	0	0	0.000176793	0	0	0	0	0	0	0	0	0	0	0	0	0	0	0	0	0	0	0	0	0	0	0	0	0	0	0	3.92989e-05	0	0	0	0	0	0	0	0	0	0	0	0	0	0	0	0	0
Otu0874	Unclassified Rhizobiales	0	0	0.000176793	0	0.000449135	0	0	0.000119868	0	0	0	0	0	0	0	0	0	0	0	0	0	0	0	7.95862e-05	0	0	0	0	0	0	0	0	0	0	0	0	0	0	0	0	0	0	0	0	0	0	0	0
Otu0875	Unclassified Rhodobacteraceae	0	0	0	0	0	0	0	0	0	0	0	0	0	0	5.06997e-05	0	0	0	0	0	0	0	0	0	0	0	0	0	0	0	7.85978e-05	0	0	0	0	0	0	0	0	0	0	0	0	0	0	0	0	0
Otu0876	OD1_genus_incertae_sedis	0	0	0	0	0	0	0	0	0.000142315	0	0	2.93574e-05	0	0	0	0	0	0	0	0	0	0	0	0	0	0	0	0	0	0	0	0	0	0	0	0	0	0	0	0	0	0	0	0	0	0	0	0
Otu0877	Unclassified Bacteria	0	0	0.000294655	0	0	0	0	2.9967e-05	0.000237192	0	0	0	6.054e-05	0	0	4.64016e-05	0.00011627	0	0	0	0	0	0	0	0	0	0	0	0	0	0.000117897	0	0	0	0	0	0	0	0	0	0	0	0	0	0	0	0	0
Otu0878	Unclassified Bacteria	0	5.97729e-05	0	0	0	0	0	0.000179802	0	0	0	2.93574e-05	0	0	5.06997e-05	0	0.00011627	0	0	0	2.77917e-05	0	0	0	0	0	0	0	0.000113295	0	3.92989e-05	0	0	0	0	0	0	0	0	0	0	0	0	0	0	0	0	0
Otu0879	Unclassified Bacteria	0	0	0	0	0	0	0	0	0	0	0	0	0	0	0	0	0	0	0	0	0	0	0	0	0	0	0	0	0	0	0	0	0	0	0	0	0	0	0	0	0	0	0	0	0	0	0	0
Otu0880	Unclassified Cytophagaceae	0	0	0	0	0	0	0	0	0	0	0	0	0	0	0	0	0	0	0	0	0	0	0	0	0	0	0	0	0	0	0	0	0	0	0	0	0	0	0	0	0	0	0	3.47017e-05	0	7.03408e-05	0	0
Otu0881	Unclassified Bacteria	0	0	5.8931e-05	0	0	0	0	0	0	0	0	0	0	0	0	0	0	0	0	0	0	0	0	0	0	0	0	0	0	0	0	0	0	2.88517e-05	0	0	3.42466e-05	0	0	4.0085e-05	1.93211e-05	2.5503e-05	0	0	0	7.03408e-05	0	0
Otu0882	Unclassified Bacteria	0.000507357	0	0	0	0.000336852	0	0	0	0	0	2.8767e-05	0	0	0	0	0	0	0	0	0	0	0	0	0	0	0	0	0	0	0	0	0	0	0	0	5.69039e-05	0	0	0	0	0	0	0	0	0	0	0	0
Otu0883	Unclassified Firmicutes	0	0	0	0	0	0	0	0	0	0	0	0	0	0	0	0	0	0	0	5.12308e-05	0	0	0	0	0	0	0	0	0	0	0	0	0	0	0	0	0	0	0	0	0	0	0	0	0	0	0	0
Otu0884	Unclassified Alphaproteobacteria	0	0	0	6.61638e-05	0	0.000110357	0	0	0	0	0	0	0	0	0	0	0	0	0	0	0	0	0	0	0	0	0	0	0	0	0	0	0	0	0	0	0	0	0	0	0	0	0	0	0	0	0	0
Otu0885	Unclassified Betaproteobacteria	0	0	0	0	0	0	0	0	0	0	0	0	0	0	0	0	0	0	0	0	0	0	0	0	0	0	0	0	0	0	0	0	0	0	0	0	0	0	0	0	0	0	0	0	0	0	0	0
Otu0886	Halomonas	0	0	0	0	0	0	0	0	0	0	0	0	0	0	0	0	0	0	0	0	0	0	0	0	0	0	0	0	0	0	0	0	0	0	0	0	0	0	0	0	0	0	0	0	0	0	0	0
Otu0887	Unclassified Gammaproteobacteria	0	0	0	0	0	0	0	0	0	0	0	0	0	0	0	0	0	0	2.79979e-05	0	0	0	0	0	0	0	0	5.67135e-05	0	0	0	0	0	0	0	0	0	0	0	0	0	0	0	0	0	0	0	0
Otu0888	Unclassified Rhizobiales	0	0	0	0	0	0	0	0	0	0	0	0	0	8.60548e-05	0	0	0	0	0	0	0	0	0	0	0	6.26645e-05	0	0	0	0	0	0	0	0	0	0	0	0	0	0	0	0	0	0	0	0	0	0
Otu0889	Unclassified Microbacteriaceae	0	0	0	0	0	0	0	0	0	0	0	0	0	0	0	0	0	0	0	0	0	0	0	0	0	0	0	0	0	0	0	0	0	0	0	0	0	0	0	0	0	0	0	0	0	0	0	0
Otu0890	Bacteroides	0	0	0	0	0	0	0	0	0	3.26232e-05	2.8767e-05	0	0	0	0	0	0	0	0	0	0	0	0	0	0	0	2.9391e-05	0	0	0	0	0	0	0	0	0	0	0	0	0	0	0	0	0	0	0	0	0
Otu0891	Unclassified Alcaligenaceae	0.000338238	0	0	0	0	0	0	0	0.000237192	0	0	0	0	0	0	0	3.87567e-05	0	0	0	0	0	0	0	0	0	0	0	0	0	0	0	0	0	0	0	0	0	0	0	0	2.5503e-05	2.17699e-05	0	0	0	0	0
Otu0892	Unclassified Bacteria	0	0	0	0	0	0	0	0	0	0	0	0	0	0	0	0	0	0	0	0	0	0	0	0	0	0	0	0	0	0	0	0	0	0	0	0	0	0	0	0	0	0	0	0	0	0	0	0
Otu0893	Unclassified Spartobacteria_family_incertae_sedis	0	0	0	0	0	0	0	0	0	0	0	0	0	0	0	0	0	0	0	2.56154e-05	0	0	0	0	0	0	0	0	0	0	0	0	0	0	0	0	0	0	0	0	0	0	0	0	0	0	5.8389e-05	0
Otu0894	Unclassified Bacteria	0	0	0.000353586	0	0	0	0	5.99341e-05	0	0	0	0	0	0	0	0	0	0	0	0	0	0	0	0	0	0	0	0	0	0	0	0	0	0	0	0	0	0	0	0	0	2.5503e-05	0	0	0	0	0	0
Otu0895	Unclassified Betaproteobacteria	0	0	0	0	0	0	0	0	0	0	0	0	0	0	0	0	0	0	0	0	0	0	0	0	0	0	0	0	0	0	0	0	0	0	0	0	0	0	0	0	0	0	0	0	0	0	0	0
Otu0896	OD1_genus_incertae_sedis	0	0	0	0	0	0	0	0	0	0	0	0	0	0	0	0	0	0	0	0	2.77917e-05	0	0	0	0	0	5.8782e-05	0	0	0.000114806	0	0	0	0	0	0	0	0	0	0	0	0	0	0	0	0	0	0
Otu0897	Unclassified Rhodospirillales	0	0	0	0	0	0	0	0	0	0	0	0	0	0	0	0	0	0	0	0	0	0	0	0	0	0	0	0	0	0	0	0	0	0	0	0	0	0	0	0	0	0	0	0	0	0	0	0
Otu0898	Unclassified Bacteria	0	0.000179319	0.000530379	0	0	0	0	0	0	0	0	0.000146787	0	0	0	0	0	0	0	0	0	0	0	0	0	0	0	5.67135e-05	0	0	0	0	0	0	0	0	0	0	0	0	0	0	0	0	0	0	0	0
Otu0899	Unclassified Alphaproteobacteria	0	0	0	0	0	0	0	0	0	0	0	0	0	0	0	0	0	0	0	0	0	0	0	0	0	0	0	0	0	0	0	0	0	0	0	0	0	0	0	0	0	0	0	0	0	0	0	0
Otu0900	Unclassified Lachnospiraceae	0	0	0	0	0	0	0	0	0	0	0	0	0	0	0	0	0	0	0	0	0	0	0	0	0	0	0	0	0	0	3.92989e-05	0	0	0	0	0	0	0	0	0	0	0	0	0	0	0	0	0
Otu0901	Planctomyces	0	0	0	0	0	0	0	0	0	0	0	0	0	0	0	0	0	0	0	0	0	0	0	0	0	0	0	0	0	0	0	0	0	0	0	0	0	0	0	0	0	0	0	0	0	0	0	0
Otu0902	Gp3	0	0	0	0	0	0	0	2.9967e-05	0	0	0	0	0	0	0	0	0	0	0	0	0	0	0	0	0	0	0	0	0	0	0	0	0	0	0	0	0	0	0	0	0	0	0	0	0	0	0	0
Otu0903	Chryseobacterium	0	0	0	0	0	0	0	8.99011e-05	0	0	0	0	0	0	0	0	0	9.68085e-05	0	0	0	0	0	0	0	0	0	0	0	0	0	0	0	0	0	0	0	0	0	0	0	0	0	0	0	0	0	0
Otu0904	Unclassified Rhodospirillales	0	5.97729e-05	0.000117862	0.000264655	0	0.000275893	0	0.000239736	0.000189753	0	0	0.000146787	0	0	0	0	0	0	0	0	8.3375e-05	0	0	0	0	0	0	0	2.83238e-05	0	0	0	0	0	0	0	0	0	0	8.017e-05	1.93211e-05	0	2.17699e-05	0	0	0	0.000145973	0
Otu0905	Unclassified Gammaproteobacteria	0	0	0	0	0	0	0	8.99011e-05	0	0	0	0	0	0	0	0	0	0	0	0	0	0	0	0	0	0	0	0	0	0	0	0	0	0	0	0	0	0	0	0	0	0	0	0	0	0	0	0
Otu0906	Anaerorhabdus	0	0	0	0	0	0.000275893	8.97666e-05	0	0	0	0	0	0	0	0	0	0	0	0	0	0	0	0	0	0	0	0	0	0	0	0	0	0	0	0	0	0	0	0	0	0	0	0	0	0	0	0	0
Otu0907	Unclassified Xanthomonadaceae	0	0	0	0	0	0	0	0	0	0	0	0	0	0	0	0	0	0	0	0	0	0	0	0	0	0	0	0	0	0	0	0	0	0	0	0	0	0	0	0	0	0	0	0	0	0	0	0
Otu0908	Unclassified Bacteria	0	0	5.8931e-05	0	0	0	0	8.99011e-05	0	0	0	2.93574e-05	0	0	0	4.64016e-05	3.87567e-05	0	0	0	0	0	0	0	0	0	0	0	0	0	0	0	0	0	0	0	0	0	0	0	0	0	0	0	0	0	0	0
Otu0909	Arenimonas	0	0	0	0	0	0	0	0	0	0	0	5.87147e-05	0	0	0	0	0	0	0	0	0	0	0	0	0	0	0	0	0	0	0	0	0	0	0	0	0	0	0	0	0	0	0	0	0	0	0	0
Otu0910	Unclassified Bacteria	0	0	0	0	0	0	0	0	0	0	0	0	0	0	0	9.28031e-05	0	0	0	0	0	0	0	0	2.91715e-05	0	0	0	0	0	0	0	0	0	0	0	0	0	0	0	0	0	0	0	0	0	0	0
Otu0911	Unclassified Bradyrhizobiaceae	0	0	0	0	0	0	0	0	0	0	0	0	0	0	0	0	0	0	0	0	0	0	0	0	0	0	0	0	2.83238e-05	0	0	0	0	0	0	0	0	0	0	0	0	0	0	3.47017e-05	0	0	0	0
Otu0912	Unclassified Bacteria	0	0	0	0	0	0	0	0	0	0	0	0	0	0	0	0	0	0	0	0	0	0	0	0	0	0	0	0	0	0	0	0	0	0	0	0	0	0	0	0	0	0	0	0	0	0	0	0
Otu0913	Citricoccus	0	5.97729e-05	0	0	0	0	0	0	0	0	0	0	0	0	0	0	0	0	0	0.000102462	0	0	0	0	0	0	0	0	0	0	0	0	0	0	0	0	0	0	0	0	3.86421e-05	0	0	0	0	0	0	0
Otu0914	Gp2	0	0	0	0	0	0	0	0	0	0	0	0	0	0	0	0	0	0	0	0	0	0	0	0	0	0	0	0	0	0	0	0	0	0	0	0	0	0	0	0	0	0	0	0	0	0	0	0
Otu0915	Unclassified Alphaproteobacteria	0	0	0	0	0	0	0	0	0	0	0	0	0	0	0	0	0	0	0	0	0	0	0	0	0	0	0	0	0	0	0	0	0	0	0	0	0	0	0	0	0	0	0	0	0	0	0	0
Otu0916	Spartobacteria_genera_incertae_sedis	0	0	0	0	0	0	0	0	0	0	0	0	0	0	0	0	0	0	0	0	0	0	0	0	0	0	0	0	0	0	0	0	0	0	0	0	0	0	0	0	0	0	0	0	0	0	0	0
Otu0917	Unclassified Bacteria	0	0	0.000117862	0	0	0	0	2.9967e-05	4.74383e-05	0	0	0	0	0	0	0	0	6.4539e-05	0	2.56154e-05	0	0.00012331	8.04311e-05	0	0	0	0	0.000113427	0	0	3.92989e-05	0	0	0	0	0	0	0	0	0	0	0	0	0	0	0	0	0
Otu0918	Sphingopyxis	0	0	0	0	0	0	0	0	0	0	0	0	0	0	0	0	0	0	0	0	0	0	0	0	0	0	0	5.67135e-05	0	0	0	0	0	0	0	0	0	0	0	0	0	0	0	0	0	0	2.91945e-05	0
Otu0919	Unclassified Rhodospirillales	0	0	0	0	0	5.51785e-05	0	0	0	0	0	0	0	0	5.06997e-05	0	0	0	0	0	0	0	0	0	0	0	0	0	0	0	0	0	0	0	0	0	0	0	0	4.0085e-05	0	0	0	0	0	0	0	0
Otu0920	Luteolibacter	0	0	0	0	0	0	0	0	0	0	0	0	0	0	0	0	0	0	0	0	0	0	0	0	0	0	0	2.83567e-05	0	0	0	2.95561e-05	0	0	0	0	0	0	0	0	0	0	0	3.47017e-05	0	0	0	0
Otu0921	Bacteriovorax	0	0	5.8931e-05	0	0	0	0	5.99341e-05	0	6.52465e-05	0	0	0.00027243	0	0	0	0	0	0	0	0	0	0	0	0.000145858	0	0	0	0	0	0	0	0	0	0	0	0	0	0	0	0	0	0	0	0	0	0	0
Otu0922	Unclassified Betaproteobacteria	0	0	0	0	0	0	0	0	0	0	2.8767e-05	0	0	0	0	0	0	0	0	0	0	0	0	0.000159172	0	0	0	0	0	0	0	0	0	0	0	0	0	0	0	0	0	0	0	0	0	0	0	0
Otu0923	Unclassified Myxococcales	0	5.97729e-05	0	0	0	0	0	5.99341e-05	0	0.000358856	0	0	0	0	0	0	0	0	0	0	0	0	0	0	0	0	0	0	0	0	0	0	0	0	0	0	0	0	0	0	0	0	0	0	0	0	0	0
Otu0924	Unclassified Betaproteobacteria	0	0	0	0	0	0	0	0	0	0	0	0	0	0	0	0	0	3.22695e-05	0	2.56154e-05	0	0	0	0	0	0	0	0	0	0	0	0	0	0	0	0	0	0	0	0	0	0	0	0	0	0	0	0
Otu0925	Unclassified Myxococcales	0	0	0	0	0	0	0	0	0	0	0	0	0	0	0	0	0	0	0	0	0	0	0	0	0	0	0	0	0	0	0	0	0	0	0	0	0	0	0	0	0	0	0	0	0	0	0	0
Otu0926	Unclassified Micromonosporaceae	0	0	0	0	0	0	0	0	0	0	0	0	0	0	0	0	0	0	0	0	0	0	0	0	0	0	0	0	0	0	0	0	0	0	0	0	0	0	0	0	0	0	0	0	0	0	0	0
Otu0927	Unclassified Fusobacteriales	0	0	0	0	0	0	0	0	0	0	0	0	0	0	0	0	0	0	0	0	0	0	0	0	0	0	0	0	0	0	0	0	0	0	0	0	0	0	0	0	0	5.10061e-05	0	0	0	0	0	0
Otu0928	Unclassified Betaproteobacteria	0	0	0	0	0	0	0	0	0	0	0	0	0	0	0	0	0	0	0	0	0	0	0	0	0	0	0	2.83567e-05	0	0	0	0	0	0	0	0	0	0	0	0	0	5.10061e-05	0	0	0	0	0	0
Otu0929	Gardnerella	0	0	0	0	0	0	0	0	0	0	0	0	0	0	0	0	0	0	0	0	0	0	0	0	0	0	0	0	0	0	0	0	3.09607e-05	0	0	0	0	0	0	0	0	0	0	0	0	0	0	0
Otu0930	Unclassified Actinomycetales	0	0	0	0	0	0.000220714	0	0	0	0	0	0	0	0	0	0	0	0	0	0	0	0	0	7.95862e-05	0	0	0	0	0	0	0	0	0	0	0	0	0	0	0	0	0	0	0	0	0	0	0	0
Otu0931	Unclassified Chlamydiales	0	0	0	0	0	0	0	0	0	0	0	0	0	0	0	0	0	0	0	0	0	0	0	7.95862e-05	0	0	0	0	5.66476e-05	0	0	0	0	0	0	0	0	0	0	0	0	0	0	0	0	0	0	0
Otu0932	Gp1	0	0	0	0	0	0	0	0	0	0	0	0	0	0	0	0	0	0	0	0	0	0	0	0	0	0	0	0	0	0	0	0	0	0	0	0	0	0	0	0	0	0	0	0	0	0	0	0
Otu0933	Unclassified Bacteria	0	0	0	0	0	0	0	0	0	0	0	0	0	0	0	0	0	0	0	0	0	0	0	0	0	0	0	0	0	0	0	0	0	0	0	0	0	0	0	0	0	0	0	0	0	0	0	0
Otu0934	Unclassified Bacteria	0	0	0	0	0	0	0	0	0	0	0	0	0	0	0	0	0	0	0	0	0	0	0	0	0	0	0	0.000226854	0	0	0	0	0	0	0	0	0	0	0	0	0	0	0	0	0	0	0	0
Otu0935	Unclassified Alphaproteobacteria	0	0	0	0	0	0	0	0	0	0	0	0	0	0	0	0	0	0	0	0	0	0	0	0	0	0	0	0	0	0	0	0	0	0	0	2.84519e-05	0	0	0	0	0	0	0	0	0	0	5.8389e-05	0
Otu0936	Unclassified Bradyrhizobiaceae	0	0	0	0	0	0	0	0	0	0	0	2.93574e-05	0	0	0	0	3.87567e-05	0	0	0	0	0	0	0	0	0	0	0	0	0	0	0	0	0	0	0	0	0	0	0	0	0	0	0	0	0	0	0
Otu0937	Unclassified Acetobacteraceae	0	0	0	0	0	0	0	0	0	0	0	0	0	0	0	0	0	0	0	0	0	0	0	0	0	0	0	0	0	0	0	0	0	0	0	0	0	0	0	0	0	0	0	0	0	0	0	0
Otu0938	Unclassified Myxococcales	0	0	0	0	0	0	0	0	0	0	0	0	0	0	0	0	0	0	0	0	0	0	0	0	0	0	0	0	0	0	0	0	0	0	0	0	0	0	0	0	0	0	0	0	0	0	0	0
Otu0939	Unclassified Bacteria	0	0	5.8931e-05	0	0	0	0	0.000119868	0	0	5.75341e-05	0	0	0	0	4.64016e-05	3.87567e-05	0	0	0	0	0	0	3.97931e-05	0	0	0	0	0	0	0	0	0	0	0	0	0	0	0	0	0	0	0	0	0	0	0	0
Otu0940	Unclassified Actinomycetales	0	0	0	0	0	0	0	0	0	0	0	0	0	0	0	0	0	0	0	0	8.3375e-05	0	8.04311e-05	0	0	0	0	0	0	0	0	0	0	0	0	0	0	0	0	0	0	0	0	0	0	0	0	0
Otu0941	Unclassified Pasteurellaceae	0	0	0	0	0	0	0	0	0	0	0	0	0	0	5.06997e-05	0	0	0	0	0	0	0	0	0	0	0	0	0	0	0	0	0	0	0	0	0	0	0	0	0	0	5.10061e-05	0	0	0	0	0	0
Otu0942	Unclassified Rhodospirillales	0	0	0	0.000198491	0.000112284	0.000110357	0.0002693	0.000119868	0.000189753	0	0	0	0	0	0	0	0	0	0	0	0	0	0	0	0.000175029	0	0	0	0	0	0	0	0	2.88517e-05	0	0	0	0	0	0	0	0	0	0	0	0	0	0
Otu0943	Unclassified Bacteria	0	0	0	0	0	0	0	0	0	0	0	0	0	0	0	0	0	0.000354965	0	0	0	0	0	7.95862e-05	0	0	0	0	0	0	0	0	0	0	0	0	0	0	0	0	0	0	0	0	0	0	0	0
Otu0944	Unclassified Alphaproteobacteria	0	0	0	0	0	5.51785e-05	0	2.9967e-05	0	0	0	0	0	0	5.06997e-05	0	0	6.4539e-05	0	0	0	0	0	0	0	0	0	0	0	0	0	0	0	0	0	0	0	0	0	0	0	0	0	0	0	0	0	0
Otu0945	Unclassified Spartobacteria_family_incertae_sedis	0	0	0	0	0	0	8.97666e-05	0	0	0	0	0	0	0	0	0	0	0	0	0	0	0	0	0	0	0	0	0	0	0	0	0	0	0	0	0	0	0	0	0	0	0	0	0	9.42418e-05	3.51704e-05	0	0
Otu0946	OD1_genus_incertae_sedis	0.000253678	0	0.000117862	0	0	0	0	2.9967e-05	0.000142315	0	0	0	0	0	0	0	0	0	0	0	0	0	0	0.000119379	0	0	0	0.000198497	0	7.65374e-05	0	0	0	0	0	0	0	0	0	0	0	0	0	0	0	0	0	0
Otu0947	Bdellovibrio	0	0	0	0	0	0	0	2.9967e-05	0	0	0	0	0	0	0	0	0	0	5.59957e-05	0	0	0	0	0	0	0	0	0	0	0	0	0	0	0	0	0	0	0	0	0	0	0	0	0	0	0	0	0
Otu0948	Mycobacterium	0	0	0	0	0	0	0	0	0	0	0	0	0	0	0	0	0	0	0	0	0	0	0	0	0	0	0	0	0	0	0	0	0	0	0	0	0	0	0	0	0	0	0	0	0	0	0	0
Otu0949	Unclassified Rhizobiales	0	0	0	0	0.000449135	0	0	0	0	0	0	0	0	0	0	0	0	0	0	0	0	0	0	0	0	0	0	0	0	0	0	0	0	0	0	0	0	0	0	0	0	0	0	0	0	0	0	0
Otu0950	Unclassified Bacteria	0	0	5.8931e-05	0.000396983	0	0	0	0	0.000237192	0	0	0	0	0	5.06997e-05	0	0	0	0	0	0	0	0	0	0	0	0	0	0	0	0	0	0	0	0	0	0	0	0	0	0	0	0	0	0	0	0	0
Otu0951	Gp16	0	0	0	0	0	0	0	0	0	0	0	0	0	0	0	0	0	0	0	0	0	0	0	0	0	0	0	0	0	0	0	0	0	0	0	0	0	0	0	0	0	0	0	0	0	0	0	0
Otu0952	Devosia	0	0	0	0	0	0	0	0	0	0	0	0	0	0	0	0	0	0	0	0	0	0	0	0	0	0	0	0	0	0	0	0	0	0	0	0	0	0	0	4.0085e-05	0	2.5503e-05	0	0	0	0	0	0
Otu0953	Beijerinckia	0	0	0	0	0	0	0	0	0	0	0	0	0	0	0	0	0	0	0	0	0	0	0	0	0	0	0	0	0	0	0	0	0	0	0	0	0	0	0	0.000200425	0	0	2.17699e-05	0	0	0	0	0
Otu0954	Unclassified Bacteria	0	0.000119546	5.8931e-05	0	0	5.51785e-05	0	5.99341e-05	0	0	0	0	0	0	0	0	0	0	0	0	2.77917e-05	0	0	0	0	0	0	0	0	0	0	0	0	0	0	0	0	0	0	0	0	0	0	0	0	0	0	0
Otu0955	Unclassified Rhodocyclaceae	0	0	0	0	0	0	0	0	0	0	0	0	0	0	0	0	0	0	0	0	0	0	0	0	0	0	0	0	0	0	0	0	0	0	0	0	0.00010274	9.4038e-05	3.03582e-05	0	0	0	2.17699e-05	0	0	0	0	0
Otu0956	Desulfuromonas	0	0	0.000176793	0	0	0.000165536	0	0	0	0	0	0	0	0	0	0	0.00011627	0	0	0	0	4.11032e-05	0	0	0	0	0	0	0	0	0	0	0	0	0	0	0	0	0	4.0085e-05	1.93211e-05	0	0	0	0	0	0	0
Otu0957	Unclassified Bacteria	0	0	0	0	0	0	0	0	0	0	0	0	0	0	0	0	0	0	0	0	0	0	0	7.95862e-05	0	0	0	0	0	0	0	0	0	0	0	0	0	0	0	0	0	0	0	0	0	0	0	0
Otu0958	Unclassified Cystobacteraceae	0	0	0	0	0	0	0	0	0	0	0	0	0	0	0	0	0	0	0	0	0	0	0	0	0	0	0	0	0	0	0	0	0	0	0	0	0	0	0	0	0	0	0	0	0	0	0	0
Otu0959	Armatimonadetes_gp5	0	0	0.000117862	0	0	0	0	0.000179802	0	0	0	0	0	0	0	9.28031e-05	0	0	0	0	2.77917e-05	0	0	3.97931e-05	0	0	0	0	0	0	0	0	0	0	0	2.84519e-05	0	0	0	0	0	0	0	0	0	0	0	0
Otu0960	Campylobacter	0	0	0	0	0	0	0	0	0	0	0	0	0	0	0	4.64016e-05	0	0	0	0	0	0	0	3.97931e-05	0	0	0	0	0	0	0	0	0	0	0	0	0	0	0	0	0	0	0	0	0	0	0	0
Otu0961	Methylobacterium	0	0	0	0	0	0	0	0	0	0	0	0	0	0	0	0	0	0	0	0	0	0	0	0	0	0	0	0	0	0	0	0	0	0	0	0	0	0	0	0	0	0	0	0	0	0	0	0
Otu0962	Holophaga	0	0	0	0	0	0	0	0	0	0	0	0	0	0	0	0	0	0	0	0	0	0	0	0	0	0	0	0	0	0	0	0	0	0	0	0	0	0	0	0	0	0	0	0	0	0	0	0
Otu0963	Unclassified Alphaproteobacteria	0	0	0	0	0	0	0	0	0	0	0	0	0.00012108	0	0	0	0	0.000290426	5.59957e-05	0	5.55833e-05	0.000164413	8.04311e-05	0	0	0	0	0	0	0	0	0	0	0	6.71141e-05	0	0	0	0	0	0	0	0	0	0	0	0	0
Otu0964	Unclassified Bacteria	0	0	0	0	0	0	0	0	0	0	0	0	0	0	0	0	0	0	0	0	0	4.11032e-05	4.02156e-05	0	0	0	0	0	0	0	0	0	0	0	0	0	0	0	0	0	0	0	0	0	0	0	0	0
Otu0965	Unclassified Porphyromonadaceae	0	0	0	0	0	0	0	0	4.74383e-05	0	0	0	0	0	0	0	0	0	0	0	0	0	0	0	0	0	0	0	0	0	0	0	0	0	0	0	3.42466e-05	0	0	0	0	0	0	0	0	0	0	0
Otu0966	Flavobacterium	0	0	0	0	0	0	0	0	0	0	5.75341e-05	0	0	0	0	0	0	0	0	0	0	0	0	0	0	0	0	2.83567e-05	0	0	0	0	0	0	0	0	0	0	0	0	0	0	0	0	0	0	0	0
Otu0967	Armatimonadetes_gp5	0	0	0	0	0	0	0	0	0	0	0	0	0	0	0	0	0	0	0	0	0	0	0	0	0	0	0	0	0	0	0	0	0	0	0	0	0	0	0	0	0	0	0	0	0	0	0	0
Otu0968	Unclassified Rhodobacteraceae	0	0	0	0	0	0	0.0002693	0.000749176	0	0	2.8767e-05	0	3.027e-05	0	0	0	0	0	0	2.56154e-05	0	0	0	0	0	0	0	0	0	0	0	0	0	0	0.000100671	0	0	0	0	0	0	0	0	0	0	0	0	0
Otu0969	Unclassified Bacteria	0	0	0	0	0	0	0	0	0	0	0	0	0	0	0	0	0	0	0	0	0	0	0	0	0	0	0	0	0	0	0	0	0	0	0	0	0	0	0	0	0	0	0	0	0	0	0	0
Otu0970	Unclassified Burkholderiales	0	0	0	0	0	0	0	0	0	0	2.8767e-05	0	0	0	0	0	0	0	0	0	0	0	4.02156e-05	0	0	0	0	0	0	0	0	0	0	0	0	0	0	0	0	0	0	0	0	0	0	0	0	0
Otu0971	Mycobacterium	0	0	0	0	0	0	0	0	0	0	0	2.93574e-05	0	0	0	0	7.75134e-05	0	0	0	0	0	0	0	0	0	0	0	0	0	0	0	0	0	0	0	0	0	0	0	0	0	0	0	0	0	0	0
Otu0972	Unclassified Bacteria	0.000591916	0	0	0	0	0	0	0	0	0	0	0	0	0	0	0	0	0	0	0	0	0	0	3.97931e-05	0	0	0	0	0	0	0	0	0	0	0	0	3.42466e-05	0	0	0	0	0	0	0	0	0	0	0
Otu0973	Unclassified Bacteria	0	0	0	0	0	0	0	0	0	0	0	0	0	0	0	0	0	0	0	0	0	0	0	0	0	0	0	0	0	0	0	0	0	0	0	0	6.84932e-05	0	0	0	0	0	0	0	0	0	0	0
Otu0974	Unclassified Chitinophagaceae	0	0	0	0	0	0.000110357	0	0	0	0	0	0	0	0	0	0	0	0	0	0	0	0	0	0	0	0	0	0	0	0	0	0	0	0	0	0	3.42466e-05	0	0	0	0	0	0	0	0	0	0	0
Otu0975	Flavobacterium	0	0	0	0	0	0	0	0	0	0	0	0	0	0	0.000101399	0	0	0	0	0	0	0.00012331	0	0	0	0	0	0	0	0	0	0	0	0	0	0	0	0	0	0	0	0	0	0	0	0	0	0
Otu0976	Unclassified Bacteria	0	0	0	0	0	0	0	0	0	0	0	0	0	0	0	0	0	0	0	0	0	0	0	0	0	0	0	0	0	0	0	0	0	0	0	0	0	0	0	0	0	0	0	0	0	0	0	0
Otu0977	Unclassified Alphaproteobacteria	0	0	0	0	0	0	0	0	0	0	0	0	0	0	0	0	3.87567e-05	0	0	0	0	0	0	0	0	0	0	0	2.83238e-05	0	0	0	0	0	0	0	0	0	0	0	0	0	0	0	0	0	0	0
Otu0978	Unclassified Acetobacteraceae	0	0.000179319	0	0	0.000224568	0	0	0	0	0	0	0	0	0	0	0	0.000155027	6.4539e-05	0	0	8.3375e-05	0	0	0	0	0	0	0.000255211	0	0	0	0	0	0	0	0	0	0	0	0	0	0	0	0	0	0	0	0
Otu0979	Tolumonas	0	0	0.000176793	0	0	0	0	0	0	0	0	0	0	0	0	0	0	0	0	0	0	0	0	0	0	0	0	0	0	0	0	0	0	0	0	2.84519e-05	0	0	0	0	0	0	0	0	0	0	0	0
Otu0980	Unclassified Bacteroidetes	0	0.000358637	0.000294655	0	0	0	0	5.99341e-05	0	0	8.63011e-05	0	0	0	0	0.000139205	7.75134e-05	0	0	0	0	0	0	0	0	0	0	0	0	0	0	0	0	0	0	0	0	0	0	0	0	0	0	0	0	0	0	0
Otu0981	Unclassified Proteobacteria	0	0	0	0	0	5.51785e-05	0	0	0	0	0	0	0	0	0	0	0	0	0	0	0	0	0	0	0	0	0	0	0	0	0	0	0	0	0	0	0	0	0	0	0	0	0	0	0	0	0	0
Otu0982	Unclassified Bacteria	0	0	0	0	0	0	0	2.9967e-05	0	0	0	0	0	0	5.06997e-05	0	0	0	0	0	0	0	0	0	0	0	0	0	0	0	0	0	0	0	0	0	0	0	0	0	0	0	0	0	0	0	0	0
Otu0983	Unclassified Deltaproteobacteria	0	0	0	0	0	0	0	0	0	0	0	0	0	0	0	0	0	0	0	0	0	0	0	0	0	0	0	0	0	0	0	0	0	0	0	0	0	0	0	0	0	0	0	0	0	0	0	0
Otu0984	Unclassified Chitinophagaceae	0	0	0	0	0	0	0	0	0	0	0	0	0	0	0	0	0	0	0	0	0	0	0	0	0	0	0	0	0	0	0	0	0	0	0	0	0	0	0	0	0	0	0	0	0	0	0	0
Otu0985	Unclassified Bacteria	0	0	0.000235724	0	0	0	0	0	0	0	5.75341e-05	2.93574e-05	9.081e-05	0	0	0	0	0	0	5.12308e-05	2.77917e-05	0	0	0	0	0	0	0	0	0	0	0	0	5.77034e-05	0	0	0	0	0	0	3.86421e-05	0	0	0	0	0	0	0
Otu0986	Curvibacter	0	0	0	0	0	0	0	0	0	0	0	0	0	0	5.06997e-05	0	0	0	0	0	0	0	0	0	0	0	0	0	0	3.82687e-05	0	0	0	0	0	0	0	0	0	0	0	0	0	0	0	0	0	0
Otu0987	Gp6	0	0	0	0	0	0	0	0	0	0	0	0	0	0	0	0	0	0	0	0	0	0	0	0	0	0	0	0	0	0	0	0	0	0	0	0	0	0	0	0	0	0	0	0	0	0	0	0
Otu0988	Unclassified Betaproteobacteria	0	0	0	0	0	0	0	0	0	0	0	2.93574e-05	0	0	0	0	0	0	0	0	0	0	4.02156e-05	0	0	0	0	0	0	0	0	0	0	0	0	5.69039e-05	0	0	0	0	0	0	0	0	0	0	0	0
Otu0989	Unclassified Bacteria	0	0	0	0	0	0	0	8.99011e-05	0	0	0	0	0	0	0	0	0	0	0	0	0	0	0	0	0	0	0	0	0	0	0	0	0	0	0	0	0	0	0	0	0	0	0	0	0	0	0	0
Otu0990	Unclassified Bacteria	0	0	0	0	0	0	0	5.99341e-05	0	0	0	5.87147e-05	0	0	0	0	0	0	0	0	2.77917e-05	0	0	0.000159172	0	0	0	0	0	0	0	0	0	0	0	0	0	0	0	0	0	0	0	0	0	0	0	0
Otu0991	Unclassified Bacteria	0	0	0	0	0	0	0	0	0	0	2.8767e-05	0	0	0	0.000101399	0	0	0	0	0	0	0	0	0	0	0	0	0	0	0	0	0	0	0	0	0	0	0	0	0	0	0	0	0	0	0	0	0
Otu0992	Unclassified Bacteria	0	0	0.000117862	0.000132328	0	0	8.97666e-05	0	0	0	0	0	0	0	0	0	0	0	0	0	0	0	0	0	0	0	0	0	0	0	0	0	0	0	0	5.69039e-05	0	0	0	0	0	0	0	0	0	0	0	0
Otu0993	Bradyrhizobium	0	0	0	0	0	0	0	0	0	0	0	0	0	0	0	0	0	9.68085e-05	2.79979e-05	0	0	0	0	0	0	0	0	0	0	0	0	0	0	0	0	0	0	0	0	0	0	0	0	0	0	0	0	0
Otu0994	Unclassified Burkholderiales	0	0	0	0	0	0	0	0	0	0	0	2.93574e-05	0	0	0	0	0	0	0	0	0	0	0	0	0	0	0	0	0	7.65374e-05	0	0	0	0	0	0	0	0	0	0	0	0	0	0	0	0	0	0
Otu0995	Bosea	0	0	0	0	0	0	0	0	0	0	0	0	0	0	0	0	0	0	0	0	0	0	0	0	0	0	0	0	0	0	0	0	0	0	0	2.84519e-05	0	0	0	0	0	0	0	0	0	0	0	0
Otu0996	Unclassified Rhizobiales	0.000676476	0	5.8931e-05	0	0	0.000165536	0	0	0	0	0	0	0	0	0	0	0	0	0	0	0	0	4.02156e-05	0	0	0	0	0	0	0	0	0	0	0	0	0	0	0	0	0	0	0	0	0	0	0	0	0
Otu0997	Exiguobacterium	0	0	0	0	0	0	0.000179533	0	0	0	2.8767e-05	0	0	0	0	0	0	0	0	0	0	0	0	0	0	0	0	0	0	0	0	0	0	0	0	0	0	0	0	0	0	0	0	0	0	0	0	0
Otu0998	Unclassified Rhizobiales_incertae_sedis	0	0	0	0	0	0	0	0	4.74383e-05	0	0	0	0	0	0	0	0	0	0	0	0	0	0	0	0	0	0	2.83567e-05	0	0	0	0	0	0	0	0	0	0	0	0	0	0	0	0	0	0	0	0
Otu0999	Unclassified Bacteria	0	0	0	0	0	0	0	2.9967e-05	0	0	0	0	0	0	0	0	0	0	0	0	0	0	0	7.95862e-05	0	0	0	2.83567e-05	0	0	0	0	0	0	0	0	0	0	0	0	0	0	0	0	0	0	0	0
Otu1000	Peptoniphilus	0	0	0	0	0	0	0	0	0	0	0	0	0	0	0	0	3.87567e-05	0	0	0	0	0	0	0	0	0	0	0	0	0	0	0	0	0	0	0	0	0	0	0	0	0	0	0	0	0	0	0
Otu1001	Nesterenkonia	0.000169119	0	0	0.000330819	0	0	0	0	0	0	0	0	0	0	0	0	0	0	0	0	0	0	0	0	0	0	0	0	0	0	0	0	0	0	0	0	0	0	0	0	0	0	0	0	0	0	0	0
Otu1002	Unclassified Comamonadaceae	0	0	0	0	0	0	0	0	0	0	0	0	0	0	0	0	0	0	0	0	2.77917e-05	0	0	0	0	0	0	0	0	0	0	0	0	0	0	0	0	0	0	0	0	0	0	0.000104105	0	0	0	0
Otu1003	Unclassified Alphaproteobacteria	0	0	0	0	0	0	0	0	0	0	0	0	0	0	0	0	7.75134e-05	0	0	0	0	0	0	0	0	0	0	0	0	0	0	0	0	0	0	0	0	0	0	0	0	0	0	3.47017e-05	0	0	0	0
Otu1004	Unclassified Betaproteobacteria	0	0	0	0	0	0	0	0	4.74383e-05	0	0	0	0	0	0	0	0	0	0	0.000102462	0	4.11032e-05	0	0	0	0	0	0	0	0	0	0	0	0	0	0	0	0	0	0	0	0	0	0	0	0	0	0
Otu1005	Unclassified Bacteria	0	0	0	0	0.000112284	0	8.97666e-05	2.9967e-05	0	0	0	0	0	0.00017211	0	0	0	0	0	0	5.55833e-05	4.11032e-05	0	0	0	0	0	0	0	0	0	0	0	0	0	0	0	0	0	0	0	5.10061e-05	0	0	0	0	0	0
Otu1006	Unclassified Proteobacteria	0	0	0	0	0	0	0	0.000119868	0	0	0	0	0	0	5.06997e-05	0	0	0	0	0	0	0	0	0	0	0	0	0	0	0	0	0	0	0	0	0	0	0	0	0	0	0	0	0	0	0	0	0
Otu1007	Unclassified Betaproteobacteria	0	0	0	0	0	0	0	0	0	0	0	0	0	0	0	0	0	0	0	0	0	0	0	0	0	0	0	0	0	0	0	0	0	0	0	0	0	0	0	0	0	0	0	0	0	0	0	0
Otu1008	Unclassified Planctomycetaceae	0	0	0	0	0	0	0	0	4.74383e-05	0	0	0	0	0	0.000101399	0	0	6.4539e-05	0	0	0	0	4.02156e-05	0	0	0	0	0	0	0	0	0	0	0	0	0	0	0	0	0	0	0	0	0	0	0	0	0
Otu1009	Sphingomonas	0	0.000239091	0	0	0	0	0	0.000119868	0	0	0	0	0	0	0	0	0	0	0	0	0	0	0	0	0	0	0	0	0	0	0	0	0	0	0	0	0	0	0	0	0	0	0	0	0	0	0	0
Otu1010	Marvinbryantia	0	0	0	0	0.000112284	0	0.000179533	0	0	0	0	0	0	0	0	0	0	0	0	0	0	0	0	0	0	0	0	0	0	0	0	0	0	0	3.3557e-05	0	0	0	0	0	1.93211e-05	0	0	0	0	0	0	0
Otu1011	Unclassified Chlamydiales	0	0	0	0	0	0	0	0	0	0	0	0	0	0	0	0	0	0	0	0	0	0	0	0	0	0	0	0	0	0	0	0	3.09607e-05	0	0	0	0	0	0	0	0	0	0	0	0	0	0	0
Otu1012	Unclassified Bacteroidetes	0	0	5.8931e-05	0	0	0	0	0.000779143	0	0	5.75341e-05	0	6.054e-05	0	0	0	3.87567e-05	0	0	0	0	4.11032e-05	0.000120647	0	0	0	0	0.000340281	2.83238e-05	0	0	0	0	0	0	0	0	0	0	0	0	0	0	0	0	0	0	0
Otu1013	Unclassified Comamonadaceae	0	0	0	0	0	0	0	0	0	0	0	0	0	0	0	0	0	0	0	0	0	0	0	0	0	0	0	0	0	0	0	0	0	0	0	0	0	0	0	0	0	0	2.17699e-05	0	0	0	0	0
Otu1014	Clostridium_XI	0	0	0	0	0	5.51785e-05	0.000179533	0.00218759	0	0	0	0	0	0	0	0	0	0	0	0	0	0	0	0	0	0	0	0	0	0	0	0	0	0	0	0	0	0	0	0	0	0	0	0	0	0	0	0
Otu1015	Unclassified Alphaproteobacteria	0	0	0	0	0	0	0	0	4.74383e-05	0	0	0	0	0	0	4.64016e-05	0	0	0	0	0	4.11032e-05	0	0	0	0	0	0	0	0	0	0	0	0	0	0	0	0	0	0	0	0	0	0	0	0	0	0
Otu1016	Armatimonadetes_gp5	0	0	0	0	0	0	8.97666e-05	0	0	0	0	0	0	0	0	0	0	0	0	0	0	0	0	0	0	0	0	0	0	0	0	0	0	0	0	0	0.00010274	0	0	0	0	0	0	0	0	0	0	0
Otu1017	3_genus_incertae_sedis	0	5.97729e-05	0	0	0	0	0	0	0	0	0	0	0	0	0	0	0	0	0	0	0	0	0	0	0	0	0	0	0	0	0	0	0	0	0	0	0	0	0	0	0	0	0	0	4.71209e-05	0	2.91945e-05	0
Otu1018	Unclassified Bacteria	0	0	0.000294655	0	0	0	0	0	0.000142315	0	0	0	0	0	0	0	0	0	0	0	0	8.22064e-05	0	7.95862e-05	0	0	0	0.000340281	0	3.82687e-05	0	0	0	0	0	0	0	0	0	0	0	0	0	0	0	0	0	0
Otu1019	Unclassified Bacteria	0	0	0.000117862	0	0.000224568	0	0	0	0	0	0	0	0	0	0	0	0	0	0	0	2.77917e-05	0	0	7.95862e-05	0	0	0	0	0	0	0	0	0	0	0	0	0	0	0	0	0	0	4.35398e-05	0	0	0	0	0
Otu1020	Sphingopyxis	0	0	0	0	0	0	0	0	0	6.52465e-05	0	0	0	0	0	0	0	0	0	0	0	0	0	0	0	0	0	0	0	0	0	0	0	0	0	0	0	0	0	0	0	0	0	0	0	0	2.91945e-05	0
Otu1021	Unclassified Bacteria	0.000591916	0	0	0	0	0	0	0	0	0	0	0	0	0	0	0	0	0	0	0	0	0	0	0	0	0	0	0	0	0	0	0	0	0.000115407	3.3557e-05	0	0	0	0	0	0	0	0	0	0	0	0	0
Otu1022	Bosea	0	0	0	0	0	0	0	0	0	0	0	0	0	0	0	0	0	0	0	0	0	0	0	0	0	0	0	0	0	0	0	0	0	0	0	2.84519e-05	0	0	0	0	0	2.5503e-05	0	0	0	0	0	0
Otu1023	Unclassified Sphingomonadaceae	0	0	0	0	0	0	0	0	0	0	0	0	0	0	0	0	7.75134e-05	0	0	0	0	0	0	0	0	0	0	0	0	0	0	0	0	0	0	0	0	0	0	0	0	0	0	0	0	0	0	0
Otu1024	Unclassified Bacteria	0	0	0	0	0	0	0	2.9967e-05	0	0	0	0	0	0	0	0	0	0	0	0	0	0	0	0	0	0	0	0	0	0	0	0	0	0	0	0	0	3.1346e-05	0	0	0	0	0	0	0	0	0	0
Otu1025	Unclassified Gammaproteobacteria	0	0.000179319	0.000412517	0	0	5.51785e-05	0.000359066	0.000389571	0	0	2.8767e-05	0	0.00012108	8.60548e-05	0.000152099	0	0.00023254	0	0	0	2.77917e-05	8.22064e-05	0	7.95862e-05	0	0	5.8782e-05	0	5.66476e-05	0	0	0	0	0	0	0	0	0	0	0	0	0	0	0	0	0	0	0
Otu1026	Unclassified Bacteria	0	0	0	6.61638e-05	0.000673703	0	0	0.000119868	0	0	0	0	0	0	0.000101399	0	0	0	0	0	0	0	0	0	0	0	0	0	0	0	0	0	0	0	0	0	0	0	0	0	0	0	0	0	0	0	0	0
Otu1027	Unclassified Proteobacteria	0	0	0	0	0	0	0	0	0	0	5.75341e-05	0	0	0	0	0	0	0	0	0	0	0	0	0	0	0	0	0	0	0	0	0	0	0	0	0	0	0	0	0	0	0	0	0	0	0	0	0
Otu1028	Sphingomonas	0	0	0	0	0	0	0	0	0	0	0	0	0	0	5.06997e-05	9.28031e-05	0	0	0	0	0	0	0	0	0	0	0	0	0	0	0	0	0	0	0	0	0	0	0	0	0	0	0	0	0	0	0	0
Otu1029	Unclassified Burkholderiales	0	0	0	0	0	0	0	0	0	0	0	0	0	0	0	0	0	0	0	0	2.77917e-05	0	0	0	0	0	0	0	0	0	0	0	0	0	0	0	0	3.1346e-05	0	0	0	0	0	0	0	0	0	0
Otu1030	Unclassified Betaproteobacteria	0	0	0	0	0	0	0	0	0	0	0	0	0	0	0	0	0	0	0	0	0	0	0	0	0	0	0	0	0	7.65374e-05	0	0	0	0	0	0	0	0	0	0	0	0	0	0	0	0	0	0
Otu1031	Planctomyces	0	0.000119546	5.8931e-05	0	0	0	0	0	0	0	0	0	0	0	0.000202799	0	0	0	0	0	0	8.22064e-05	0	0.000198965	0	0	0	0	0	0.000153075	0.000117897	0	0	0	0	0	0	0	0	0	3.86421e-05	0	0	0	0	0	0	0
Otu1032	Algoriphagus	0	0	0	0	0	0	0	0	0	0	0	0	0	0	0	4.64016e-05	0	0	0	0	0	0	0	0	0	0	0	0	0	0	0	0	0	0	0	0	0	0	0	0	0	0	0	0	0	0	0	2.83503e-05
Otu1033	Unclassified Proteobacteria	0	0	0	0	0	0	0	0	0	0	0	0	0	0	0	0	0	0	0	0	2.77917e-05	0	0	0	0	0	0	0	0	0	0	0	0	0	0	0	0	0	0	0	1.93211e-05	0	0	0	0	0	0	0
Otu1034	Unclassified Desulfobacteraceae	0	0	0	0	0	0	0	0	0	0	0	0	0	0	0	0	0	0	0	0	5.55833e-05	0	0	0	0	0	0	0	0	0	0	0	0	0	0	0	0.000136986	0	0	0	0	0	0	0	0	0	0	0
Otu1035	Unclassified Betaproteobacteria	0	0	0	0	0	0	0	0	0	0	0	0	0	0	0	0	0	0	0	0	0	0	0	0	0	0	0	0	0	0	0	0	0	0	0	0	0	3.1346e-05	0	0	0	0	2.17699e-05	0	0	0	0	0
Otu1036	Turicibacter	0	0	0	0	0	0	0	0	0	0	0	0	0	0	0	0	0	0	0	0	0	4.11032e-05	0	0	0	0	0	0	2.83238e-05	0	0	0	0	0	0	0	0	0	0	0	0	0	0	0	0	0	0	0
Otu1037	Unclassified Sphingomonadaceae	0	0	0	0	0	0	0	0	0	0	0	0	0	0	5.06997e-05	0	0	0	0	0	0	0	0	0	0	0	0	0	0	0	0	0	0	0	0	0	0	0	0	0	0	0	0	0	0	0	2.91945e-05	0
Otu1038	Pseudonocardia	0	0	0	0	0	0	0	0	0	0	0	0	0	0	0	0	0	0	0	0	0	0	0	0	0	0	0	0	0	0	0	0	0	0	0	0	0	0	0	0	0	0	0	0	0	0	0	0
Otu1039	Unclassified Actinomycetales	0	0	0	0	0	0	0	0	0	0	0	0	0	0	0	0	0	0	0	0	0	0	0	0	0	0	0	0	0	0.000153075	0	0	0	0	0	0	0	0	0	0	0	0	0	0	0	0	0	0
Otu1040	Mycobacterium	0	0	0.000117862	0	0	0	0.000179533	0	0	0	0	0	0	0	0	0	0	0	0	0	0	4.11032e-05	0	0	0	3.13322e-05	0	0	5.66476e-05	0	0	0	0	0	0	0	0	0	0	0	0	0	0	0	0	0	0	0
Otu1041	Unclassified Bacteria	0	0	0	6.61638e-05	0	0	0	0	0	0	0	0	0	0	0	0	0	0	0	0	0	0	0	0	0	0	0	0	0	0	0	0	0	0	0	0	0	0	0	0	1.93211e-05	0	0	0	0	0	0	0
Otu1042	Unclassified Bacteria	0	0.000119546	0.000117862	0	0	0	0	0	0	0	0	0	0	0	0	0	0	0	0	0	0	0	0	0	0	0	0	0	0	0	0	0	0	0	0	0	0	0	0	0	0	0	0	0	0	0	0	0
Otu1043	Unclassified Alphaproteobacteria	0	0	0	0	0.000112284	0	0	0	9.48767e-05	0	0	0	0	0	0	0	0	0	0	0	0	0	0	0	0	0	0	0	0	0	0	0	0	0	0	0	0	0	0	0	0	0	0	0	0	0	0	0
Otu1044	Unclassified Rhizobiales	0	0	0	0	0	0	0	0	0	0	0	0	0	0	0	0	0	0	0	0	0	4.11032e-05	0	0	0	0	0	0	0	0	0	0	0	0	0	0	0	0	0	0	0	0	4.35398e-05	0	0	0	0	0
Otu1045	Labrys	0	0	0	0	0	0	0	0	0	0	0	0	0	0	0	0	0	0	0	0	0	0	0	0	0	0	0	0	0	0	0	0	0	0	0	0	0	0	0	0	0	0	0	0	0	0	0	0
Otu1046	Geothrix	0	0	0	6.61638e-05	0	0	0	0	0	0	0	0	0	0	0	0	0	0	0	0	5.55833e-05	0	0	0	0	0	0	0	0	0	0	0	0	0	0	0	0	0	0	0	0	0	0	0	0	0	0	0
Otu1047	Unclassified Sphingomonadaceae	0	0	0	0	0	0	0	0	0	0	0	0	0	0	0	4.64016e-05	0	0	0	0	0	0	8.04311e-05	0	0	0	0	0	0	0	0	0	0	0	0	0	0	0	0	0	0	0	0	0	0	0	0	0
Otu1048	Unclassified Myxococcales	0	0	0	0	0	0	0	0	0	0.000424102	0	0	0	0	0	0	0	0	0	0	0	0	0	0	0	0	0	0	0	0	0	0	0	0	0	0	0	0	0	0	0	0	0	0	0	0	0	0
Otu1049	Perlucidibaca	8.45594e-05	0	0	0	0	0	0	0	9.48767e-05	0	0	0	0	0	0	0	0	0	0	0	0	0	0	0	0	0	0	0	0	0	0	0	0	0	0	0	0	0	0	0	0	0	0	0	0	0	0	0
Otu1050	Unclassified Bacteria	0	0	0	0	0	0	0	5.99341e-05	4.74383e-05	0	0	0	0	0	0	0	0	0	0	0	0	0	0	0	0	0	0	0	0	0	0	0	0	2.88517e-05	0	0	0	0	0	0	0	0	0	0.000520526	0	0	0	0
Otu1051	Unclassified Bacteria	0	0	0	0	0	0	0	0	0	0	5.75341e-05	0	0	0	0	0	0	0	0	0	0	0	0	0	0	0	0	0	0	0	0	0	0	0	0	0	0	0	0	0	0	0	0	0	0	0	0	0
Otu1052	Unclassified Betaproteobacteria	0	0	0	0	0	0	0	0	0	0	0	0	0	0	0	0	0	0	0	0	0	0	0	0	0	0	0	0	0	0	0	0	0	0	0	0	0	0	0	0	0	0	0	0	0	0	0	0
Otu1053	Unclassified Bacteria	0.000169119	5.97729e-05	0.000117862	0.000396983	0	0.000220714	0	0	0	0	0	0	0	0	0	0	0	0	0	0.000230539	2.77917e-05	0	0	0	0	0	0	0	0.000169943	0	0	0	0	0	0	2.84519e-05	0	0	0	0	0	0	0	0	0	0	0	0
Otu1054	Unclassified Actinomycetales	0	0	0	0	0	0	0	0	0	0	0	0	0	0	0	0	0	0	0	0	0	0	0	0	0	0	0	0	0	0	0	0	0	0	0	0	0	0	0	0	0	0	0	0	0	0	0	0
Otu1055	Unclassified Bacteroidetes	0	0	0	0	0	0	0	0	0.000379507	0	0	0	0	0	0	0	0	0	0	0	0	0	0	0	0	0	0	5.67135e-05	0	0	0	0	0	0	0	0	0	0	0	0	0	0	0	0	0	0	0	0
Otu1056	Unclassified Bacteria	0	0	0	0	0	0	0	0	0	0	0	5.87147e-05	0	0	0	0	0	0	0	0	0	0	0	0	0	0	0	2.83567e-05	0	0	0	0	0	0	0	0	0	0	0	0	0	0	0	0	0	0	0	0
Otu1057	Unclassified Bacteria	0	0	0.000235724	0	0	0	0	0	0	0	0	0	0	0	0	0	0	0	0	0	0	0	0	0	0	0	0	8.50702e-05	0	0	0	0	0	0	0	0	0	0	0	0	0	0	0	0	0	0	0	0
Otu1058	Unclassified Alphaproteobacteria	0	0	0	0	0	0	0	0	0	0	0	0	0	0	0	0	3.87567e-05	0	0	0	0	4.11032e-05	0	0	0	0	0	0	0	0	0	0	0	0	0	0	0	0	0	0	0	0	0	0	0	0	0	0
Otu1059	Unclassified Gammaproteobacteria	0	0	0	0	0	0	0	0	0	0	0	5.87147e-05	0	0	0	0	0	0	0	0	0	0	0	7.95862e-05	0	0	0	0	0	0	0	0	0	0	0	0	0	0	0	0	0	0	0	0	0	0	0	0
Otu1060	Unclassified Bacteria	0	0	0	0	0	0.000110357	0	0	0	0	0	8.80721e-05	0	0.000215137	0	0	0.00011627	0	0	0	0	0	0	0	0	0	0	2.83567e-05	0	0.000114806	0	0	0	0	0	0	0	0	0	0	0	0	0	0	0	0	0	0
Otu1061	Unclassified Bacteroidetes	0	0	0	0	0	0	0	0	4.74383e-05	0	0	0	0	0	0.000101399	0	0	0	0	0	0	0	0	0	0	0	0	0.000141784	0	0	0	0	0	0	0	0	0	0	0	0	0	0	0	0	0	0	0	0
Otu1062	Gp2	0	0	0	0	0	0	0	0	0	0	0	0	0	0	0	0	0	0	0	0	0	0	0	0	0	0	0	0	0	0	0	0	0	0	0	0	0	0	0	0	0	0	0	0	0	0	0	0
Otu1063	Unclassified Sphingomonadales	0	0	0	0	0	0	0	0	0	3.26232e-05	0	0	0	0	0	0	0	0	0	2.56154e-05	0	0	0	0	0	0	0	0	0	0	0	0	0	0	0	0	0	0	0	0	0	0	0	0	0	0	0	0
Otu1064	Unclassified Bacteria	0	0	0.000117862	0	0	0	8.97666e-05	0	9.48767e-05	0	5.75341e-05	0	0	0	0	0	0	0	0	0	0	0	0	0	0	0	0	2.83567e-05	0	0	0	0	0	0	0	0	0	0	0	0	0	0	0	0	0	0	0	0
Otu1065	Unclassified Rhizobiales	0	0	0	0	0	5.51785e-05	0	0.000119868	0	0	0	0	0	0	0	0	0	0	0	0	0	0	0	0	0	0	0	0	0	0.000153075	0	0	0	0	0	0	0	0	0	0	0	0	0	0	0	0	0	0
Otu1066	Unclassified Alphaproteobacteria	0	0	0	0	0	0	0	0	0	0	0	0	0	0	0	0	0	0	0	0	0	0	0	0	0	0	0	0	0	0	0.000235793	0	0	0	0	0	0	0	0	0	0	0	0	0	0	0	0	0
Otu1067	Unclassified Ktedonobacteria	0	0	0	0	0	0	0	0	0	0	0	0	0	0	0	0	0	0	0	0	0	0	0	0	0	0	0	0	0	0	0	0	0	0	0	0	0	0	0	0	0	0	0	0	0	0	0	0
Otu1068	Unclassified Bacteria	0	0.000119546	0.000176793	0.000198491	0	0	0	2.9967e-05	4.74383e-05	0	0	0	0	0	0	0	0	9.68085e-05	0	0	0	0	0	0	0	0	0	0	0	0	0	0	0	0	3.3557e-05	5.69039e-05	0	3.1346e-05	6.07165e-05	0.000120255	0	0	0	0	0	0	0	0
Otu1069	Unclassified Alphaproteobacteria	0	0	0	0	0	0	0	0	0	0	0	0	0	0	0	0	0	0	0.00039197	0	0	0	0	0	0	0	0	0	0	0	0	0	0	0	0	0	0	0	0	0	0	0	0	0	0	0	0	0
Otu1070	Unclassified Bacteroidetes	0	0	5.8931e-05	0	0	0	0	0	0	0	0	2.93574e-05	0	0	0	0	0	0	0	0	0	0	0	0	0	0	0	8.50702e-05	0	0	0	0	0	0	0	0	0	0	0	0	0	0	0	0	0	0	0	0
Otu1071	Unclassified Gammaproteobacteria	0	0	0	0	0	0.000220714	0	0	0	0	0	0	0	0	0	0	0	0	0	0	0	0	0	0	0	0	0	0	0	0	0	0	0	0	0	0	0	0	3.03582e-05	0	0	0	0	0	0	0	0	0
Otu1072	Gp7	0	0	0	0	0	0	0	0	0	0	0	0	0	0	0	0	0	0	0	0	0	0	0	0	0	0	0	0	0	0	0	0	0	0	0	0	0	0	0	0	0	0	0	0	0	0	0	0
Otu1073	Unclassified Actinomycetales	0	0	0	0	0	0	0	0	0	0	0	0	0	0	5.06997e-05	0	0	0	0	0	0	0	0	0	0	0	0	0	0	0	0	2.95561e-05	0	0	0	0	0	0	0	0	0	0	0	0	0	0	0	0
Otu1074	Unclassified Sphingobacteriales	0	0	0	0.000330819	0	0.000110357	0	5.99341e-05	0	0	0	2.93574e-05	0	0.000129082	5.06997e-05	0	3.87567e-05	0	0	0	0	0	0	0	0	0	0	0	0	0	0	0	0	0	0	0	0	0	0	0	0	0	0	0	0	0	0	0
Otu1075	Unclassified Bacteria	0	0	0	0.000396983	0	5.51785e-05	0	5.99341e-05	0	0	0	0	0	0	0	0	0.00011627	0	0	0	0	0	0	0	0	0	0	0	0	0	0	0	0	0	0	0	0	0	0	0	0	0	0	0	0	0	0	0
Otu1076	Unclassified Deltaproteobacteria	0	0	0	0	0	0	0	0	0	0	0	0	0	0	0	0	0	3.22695e-05	0	0	0	0	0	0	0	0	0	0	0	0	0	0	0	0	0	0	0	0	0	0	0	0	0	0	0	0	0	0
Otu1077	Unclassified Bacteria	0	0	0	0	0	0	0	0	0	0	0	0	0	0	0	0	0	3.22695e-05	0	0	2.77917e-05	0	0	0	0	0	0	0	0	0	0	0	0	0	0	0	0	0	0	0	0	0	0	0	0	0	0	0
Otu1078	Unclassified Betaproteobacteria	0	0	0	0	0	0	0	0	0	0	0	0	0	0	0	0	0	0	0	0	0	0	0	0	0	0	0	5.67135e-05	0	0	0	0	0	0	0	0	0	0	0	0	0	0	4.35398e-05	0	0	0	0	0
Otu1079	Unclassified Bacteria	0	0	0	0	0	0.000110357	0	0	0	0	0	0	0	0	0	0	0	0	0	0	0	0	0	0	0	0	0	0.000141784	0	0	0	0	0	0	0	0	0	0	0	0	0	0	2.17699e-05	0	0	0	0	0
Otu1080	Unclassified Clostridiales	0	0	0	6.61638e-05	0	0	0	0	4.74383e-05	0	0	8.80721e-05	0	0	0	0	0	0	0	0	0	0	0	0	0	0	0	0	0	0	0	0	0	0	0	0	0	0	0	0	0	0	0	0	0	0	0	0
Otu1081	Unclassified Verrucomicrobiaceae	0	0	0	0	0	0	0	0	0	0	0	0	0	0	0	0	0	0	0	0	0	0	0	0	0	0	0	0	0	3.82687e-05	0	0	0	0	0	0	0	0	0	0	0	0	0	6.94035e-05	0	0	2.91945e-05	0
Otu1082	Unclassified Rhodobacteraceae	0	0	0	0	0	0	0	0	0	0	0	0	0	0	0	0	0	0	0	0	0	0	0	0	0	0	0	0	0	0	0	0	0	0	0	0	0.00010274	0	0	0	0	2.5503e-05	2.17699e-05	0	0	0	0	0
Otu1083	Unclassified Bacteria	0	0.000119546	0.000117862	0	0	0	0.000179533	0.000179802	0	0	0	0	0	0	0	0	0	0	0	0	0	0	0	0	0	0	0	0	0	0	0	0	0	0	0	0	0	0	0	0	0	0	0	0	0	0	0	0
Otu1084	Aquimonas	0	0	0	0	0	0	0	2.9967e-05	0	0	0	0	0	0	0	0	0	0	0	0	0	0	0	0	0	0	0	0	0	0	0	0	0	0	0	0	0	0	0	0	0	0	0	0	0	0	0	0
Otu1085	Cupriavidus	0	0	0	0	0.000336852	0	0	0	0.000379507	0	0	0	0	0	0	0	0	0	0	0	0	0	0	0	0	0	0	0	0	0	0	0	0	0	0	0	0	0	0	0	0	0	0	0	0	0	0	0
Otu1086	Unclassified Burkholderiales	0	0	0	0	0	0	0	0	0	0	0	0	0	0	0	0	0	0	0	0	0	0	0	0	0	0	0	8.50702e-05	0	0	0	0	0	0	0	0	0	0	0	0	0	0	2.17699e-05	0	0	0	0	0
Otu1087	Dyadobacter	0	0	0	0	0	0	0	0	0	0	2.8767e-05	0	0	0	0	0	0	0	0	2.56154e-05	0	0	0	0	0	0	0	0	0	0	0	0	0	0	0	0	0	0	0	0	0	0	0	0	0	0	0	0
Otu1088	Unclassified Proteobacteria	0	0	0	0	0	0	0	0	0	0	0	0	0	0	0	0	0	0	0	0	0	0	0	0	0	0	0	0	0	0	0	0	0	0	0	0	0	0	6.07165e-05	0	0	0	0	0	0	7.03408e-05	5.8389e-05	0
Otu1089	Cloacibacterium	0	0	0	0	0.0186391	0	0	0	0	0	0	0	0	0	0	0	0	0	0	0	0	0	0	0	0	0	0	0	0	0	0.000392989	0	0	0	0	0	0	0	0	0	0	0	0	0	0	0	0	0
Otu1090	Unclassified Bacteria	0	0	0	0	0	0	0	0	0	0	0	0	0	0	0	0	0	0	0	0	2.77917e-05	4.11032e-05	0	0	0	0	0	0	0	0	0	0	0	0	0	0	0	0	3.03582e-05	0	0	0	0	0	0	0	0	0
Otu1091	Unclassified Burkholderiales	0	0	0	0	0	0	0	0	0	0	0	0	0	0	0	4.64016e-05	0	0	0	0	0	0	0	0	2.91715e-05	0	0	0	0	0	0	0	0	0	0	0	0	0	0	0	0	0	0	0	0	0	0	0
Otu1092	Sanguibacter	0	0	0	0	0.000898271	0	0	0	0	0	0	0	0	0	0	0	0	0	0	0	0	4.11032e-05	0	0	0	0	0	0	0	0	0	0	0	0	0	0	0	0	0	0	0	0	0	0	0	0	0	0
Otu1093	Unclassified Gammaproteobacteria	0	0.000298864	5.8931e-05	0	0	0	0	2.9967e-05	0	0	0	0	0.00015135	0	0	0	0	0	0	0	0	0	0	3.97931e-05	0	0	0	0	0	0	0	0	0	0	0	0	0	0	0	0	0	0	0	0	0	0	0	0
Otu1094	Unclassified Chitinophagaceae	0	5.97729e-05	0	0	0	0	0	0	0	0	0	0	0	0	0	9.28031e-05	0	0	0	0	5.55833e-05	4.11032e-05	0	0	0	0	0	0	0	0	0	0	0	0	0	0	0	0	0	0	0	0	0	0	0	0	0	0
Otu1095	Unclassified Sphingomonadaceae	0	0	0	0	0	0	0	0	0	0	0	0	0	0	0	0	0	0	0	0	0	0	0	0	0	0	0	0	0	0	0	0	0	0	0	0	3.42466e-05	0	0	0	0	0	0	0	0	0	0	0
Otu1096	Gemmata	0	0	0	0	0	0	0	0	0	0	0	0	0	0	0	0	0	0	0	0	0	0	0	0	0	0	0	0	0	0	0	0	0	0	0	0	0	0	0	0	0	0	0	0	0	0	0	0
Otu1097	Gp2	0	0	0	0	0	0	0	0	0	0	0	0	0	0	0	0	0	0	0	0	0	0	0	0	0	0	0	0	0	0	0	0	0	0	0	0	0	0	0	0	0	0	0	0	0	0	0	0
Otu1098	Unclassified Actinomycetales	0	0	0	0	0	0	0	0	0	0	0	2.93574e-05	0	0	0	0	0	0	0	0	2.77917e-05	0	0	0	0	0	0	0	0	0	0	0	0	0	0	0	0	0	0	0	0	0	0	0	0	0	0	0
Otu1099	Anaeroplasma	0	0	0	0	0	0	0	0	0	0	0	0	0	0	5.06997e-05	0	0	0	0	2.56154e-05	0	0	0	0	0	0	0	2.83567e-05	0	0	0	0	0	0	0	0	0	0	0	0	0	0	0	0	0	0	0	0
Otu1100	Faecalibacterium	0	0	0	0	0	0	0	0	0	3.26232e-05	0	0	0	0	0	0	0	0	0	0	0	0	0	0	0	0	0	0	0	0	0	0	0	0	0	0	0	0	0	0	0	0	0	0	0	0	0	2.83503e-05
Otu1101	Unclassified Bacteroidetes	0	0	0	0	0	0	0	0	0	0	0	0	0	0	0	0	0	0	0	0	0	0	0	0	0	0	0	0	0	0	3.92989e-05	0	0	0	0	0	0	0	0	0	0	0	0	0	0	0	0	0
Otu1102	Unclassified Acetobacteraceae	0	0	0	0	0	0	0	0	0	0	0	5.87147e-05	0	0	0	0	0	0	0	0	0	0	0	0	0	0	0	0	0	0	0	0	0	0	0	0	0	0	0	0	0	0	0	0	0	0	0	0
Otu1103	Simkania	0	0	0	0	0	0	0	0	0	0	0	0	0	0	0	0	0	0.000129078	0	0	0	0	0	0	0	0	0	0	0	0	0	0	0	0	0	0	0	0	0	0	0	0	0	0	0	0	0	0
Otu1104	Luteolibacter	0	0	0	0	0	0	0	0	0	0	0	0	0	0	0	0	0	3.22695e-05	0	0	0	0	0	0	0	0	0	0	0	0	0	0	0	0	0	0	0	0	0	0	0	0	0	0	0	0	0	0
Otu1105	Unclassified Firmicutes	0	0	0	0	0	0	0	0	0	0	0	0	0	0	0	0	0	0	0	0	0	0	0	0	0	0	0	0	0	0	0	0	0	0	0	0	0	0	0	8.017e-05	0	0	0	0	0	0	0	0
Otu1106	Unclassified Bacteria	0	0	0	0	0	0	0	0	0	0	0	0	0	0	0	0	3.87567e-05	0	0	0	0	0	0	0	0	0	0	0	0	0	0	0	0	0	0	0	0	0	0	0	0	0	0	0	0	0	0	0
Otu1107	Pedomicrobium	0	0	0	0	0	0	0	0	0	0	0	0	0	0	0	0	3.87567e-05	0	0	0	0	0	0	0	0	0	0	0	0	0	0	0	0	0	0	0	0	0	0	0	0	0	0	0	0	0	0	0
Otu1108	Unclassified Bacteria	0	0	0	0	0	0	0	0	0	0	0	0	0	0	0	0	0	0	0	0	0	0	0	0	0	0	0	0	0	0	3.92989e-05	0	0	0	0	0	0	0	0	0	0	0	0	0	0	0	0	0
Otu1109	Unclassified Sphingomonadaceae	0	0	0	0	0	0	0	0	0	0	0	0	0	0	0	0	0	0	0	0	0	0	0	0	0	0	0	0	0	0	3.92989e-05	0	0	0	0	0	0	0	0	0	0	0	0	0	0	0	0	0
Otu1110	Opitutus	0	0	0	0	0	0	0	0	0	0	0	0	0	0	0	0	0	0	0	0	5.55833e-05	0	0	0	0	0	0	0	0	0	0	0	0	0	0	0	0	0	0	0	0	0	0	0	0	0	0	0
Otu1111	Unclassified Betaproteobacteria	0	0	0	0	0	0	0	0	0	0	0	0	0	0	0	0	0	0	0	0	0	0	0	0	0	0	0	0	0	0	3.92989e-05	0	0	0	0	0	0	0	0	0	0	0	0	0	0	0	0	0
Otu1112	Unclassified Bacteroidetes	0	0	0	0	0	0	0	0	0	0	0	0	0	0	0	0	0	0	0	0	5.55833e-05	0	0	0	0	0	0	0	0	0	0	0	0	0	0	0	0	0	0	0	0	0	0	0	0	0	0	0
Otu1113	Unclassified Burkholderiales	0	0	0	0	0	0	0	0	0	0	0	0	0	0	0	0	0	0	0	0	2.77917e-05	0	0	0	0	0	0	0	0	0	0	0	0	0	0	0	0	0	0	0	0	0	0	0	0	0	0	0
Otu1114	Unclassified Rhizobiales	0	0	0	0	0	0	0	0	0	0	0	0	0	0	0	0	0	3.22695e-05	0	0	0	0	0	0	0	0	0	0	0	0	0	0	0	0	0	0	0	0	0	0	0	0	0	0	0	0	0	0
Otu1115	Paenibacillus	0	0	0	0	0	0	0	0	0	0	0	0	0	0	0	0	0	0	0	0	2.77917e-05	0	0	0	0	0	0	0	0	0	0	0	0	0	0	0	0	0	0	0	0	0	0	0	0	0	0	0
Otu1116	Unclassified Caulobacteraceae	0	0	0	0	0	0	0	0	0	0	0	0	0	0	0	0	0	0	0	0	2.77917e-05	0	0	0	0	0	0	0	0	0	0	0	0	0	0	0	0	0	0	0	0	0	0	0	0	0	0	0
Otu1117	Unclassified Clostridiales	0	0	0	0	0	0	0	0	0	0	0	0	0	0	0	0	0	0	0	0	0	0	0	0	0	0	0	0	0	0	0	0	0	0	0	0	0	0	0	0	0	0	0	0	4.71209e-05	0	0	0
Otu1118	Parabacteroides	0	0	0	0	0	0	0	0	0	0	0	2.93574e-05	0	0	0	0	0	0	0	0	0	0	0	0	0	0	0	0	0	0	0	0	0	0	0	0	0	0	0	0	0	0	0	0	0	0	0	0
Otu1119	Unclassified Betaproteobacteria	0	0	0	0	0	0	0	0	0	0	0	0	0	0	0	0	0	0	0	0	0	0	0	0	0	0	0	0	0	0	0	0	0	0	0	0	0	0	0	0	0	0	0	0	4.71209e-05	0	0	0
Otu1120	Unclassified Hyphomicrobiaceae	0	0	0	0.000198491	0	0	0	0	0	0	0	0	0	0	0	0	3.87567e-05	9.68085e-05	0.000167987	0	0	0	0	0	0	0	0	0	0	0	0	0	0	0	0	0	0	0	0	0	0	0	0	0	0	0	0	0
Otu1121	Unclassified Bacteria	0	0	0	0	0	0	0	0	0	0	0	0	0	0	5.06997e-05	0	0	0	0	0	5.55833e-05	0	0	7.95862e-05	5.83431e-05	0	0	0	0	0	0	0	0	0	0	0	0	0	0	0	0	0	0	0	0	0	0	0
Otu1122	Neochlamydia	0	0	0	0	0	0	0	0	0	0	0	0	0	0	0	0	0	0	0	0	0	0	0	0	0	0	0	0	0	0	0	0	0	0	0	0	0	0	0	0	1.93211e-05	0	0	0	0	0	0	0
Otu1123	Unclassified Alphaproteobacteria	0	0	0	0	0	0	0	0	0	0	0	0	0	0	0	0	0	0	0	0	2.77917e-05	0	0	0	0	0	0	0	0	0	0	0	0	0	0	0	0	0	0	0	0	0	0	0	0	0	0	0
Otu1124	Unclassified Bacteria	0	0	0	0	0	0	0	0	0	0	0	0	0	0	0	0	0	0	0	0	0	0	0	0	0	0	0	0	0	0	0	0	0	0	0	0	0	0	0	0	0	0	0	0	4.71209e-05	0	0	0
Otu1125	Unclassified Burkholderiales	0	0	0	0	0	0	0	0	0	0	0	0	0	0	0	0	0	0	0	0	0	0	0	0	0	0	0	0	0	0	0	0	0	0	0	0	0	0	0	0	0	0	0	0	4.71209e-05	0	0	0
Otu1126	Unclassified Bacteria	0	0	0	0	0	0	0	0	0	0	0	0	0	0	0	0	0.00011627	0	0	0	0	0	0	0	0	0	0	0	0	0	0	0	0	0	0	0	0	0	0	0	0	0	0	0	0	0	0	0
Otu1127	Sphingopyxis	0	0	0	0	0	0	0	0	0	0	0	0	0	0	0	0	0	0	0	0	2.77917e-05	0	0	0	0	0	0	0	0	0	0	0	0	0	0	0	0	0	0	0	0	0	0	0	0	0	0	0
Otu1128	Unclassified Alphaproteobacteria	0	0	0	0	0	0	0	0	0	0	0	0	0	0	0	0	0.00011627	0	0	0	0	0	0	0	0	0	0	0	0	0	0	0	0	0	0	0	0	0	0	0	0	0	0	0	0	0	0	0
Otu1129	Sphingopyxis	0	0	0	0	0	0	0	0	0	0	0	0	0	0	0	0	0	0	0	0	0	0	0	0	2.91715e-05	0	0	0	0	0	0	0	0	0	0	0	0	0	0	0	0	0	0	0	0	0	0	0
Otu1130	Unclassified Clostridiales_Incertae_Sedis_XII	0	0	0	0	0	0	0	0	0	0	0	0	0	0	0	0	0	9.68085e-05	0	0	0	0	0	0	0	0	0	0	0	0	0	0	0	0	0	0	0	0	0	0	0	0	0	0	0	0	0	0
Otu1131	Unclassified Sphingobacteriales	0	0	0	0	0	0	0	0	0	0	0	0	0	0	0	0	0	0	0	0	2.77917e-05	0	0	0	0	0	0	0	0	0	0	0	0	0	0	0	0	0	0	0	0	0	0	0	0	0	0	0
Otu1132	Unclassified Actinomycetales	0	0	0	0	0	0	0	0	0	0	0	0	0	0	0	0	0	0	0	0	5.55833e-05	0	0	0	0	0	0	0	0	0	0	0	0	0	0	0	0	0	0	0	0	0	0	0	0	0	0	0
Otu1133	Singulisphaera	0	0	0	0	0	0	0	0	0	0	0	0	0	0	0	0	0	0	0	0	0	0	0	0	0	0	0	0	0	0	0	0	0	0	0	0	0	0	0	0	3.86421e-05	0	0	0	0	0	0	0
Otu1134	Sulfurospirillum	0	0	0	0	0	0	0	0	0	0	0	0	0	0	0	0	0	0	0	0	2.77917e-05	0	0	0	0	0	0	0	0	0	0	0	0	0	0	0	0	0	0	0	0	0	0	0	0	0	0	0
Otu1135	Unclassified Deltaproteobacteria	0	0	0.000235724	0	0	0	0	0	0	0	0	0	0	0	0	0	3.87567e-05	0	0	0	8.3375e-05	0	0	0	0	0	0	0	0	0	0	0	0	0	0	0	0	0	0	0	0	0	0	0	0	0	0	0
Otu1136	Unclassified Bacteria	0	0	0	0	0	0	0	0	0	0	0	0	0	0	0	0	0	0	0	0	0	0	0	0	0	0	0	0	0	0	0	0	0	0	0	0	0	0	0	0	0	2.5503e-05	0	0	0	0	0	0
Otu1137	Unclassified Proteobacteria	0	0	0	0	0	0	0	0	0	0	0	0	0	0	0	0	0	0	0	0	0	0	0	0	0	0	0	0	0	0	0	0	0	0	0	0	0	0	0	0	0	2.5503e-05	0	0	0	0	0	0
Otu1138	Unclassified Planctomycetaceae	0	0	0	0	0	0	0	0	0	0	0	0	0	0	0	0	0	0	0	0	2.77917e-05	0	0	0	0	0	0	0	0	0	0	0	0	0	0	0	0	0	0	0	0	0	0	0	0	0	0	0
Otu1139	Unclassified Rhizobiales	0	0	0	0	0	0	0	0	0	0	0	5.87147e-05	0	0	0	0	0	0	0	0	0	0	0	0	0	0	0	0	0	0	0	0	0	0	0	0	0	0	0	0	0	0	0	0	0	0	0	0
Otu1140	Unclassified Burkholderiales	0	0	0	0	0	0	0	0	0	0	0	0	0	0	0	0	0	0	0	0	0	0	0	0	0	0	0	0	0	0	0	0	0	0	0	0	0	0	0	0	0	0	0	0	0	0	0	0
Otu1141	Unclassified Betaproteobacteria	0	0	0	0	0	0	0	0	0	0	0	0	0	0	0	0	0	0	0	0	0	0	0	0	0	0	0	0	0	0	0	0	0	0	0	0	0	0	0	0	0	0	0	0	4.71209e-05	0	0	0
Otu1142	Unclassified unclassified	0	0	0	0	0	0	0	0	0.000237192	0	0	0	0	0	0	0	0	3.22695e-05	0	0	0	0	0	0	0	0	0	0	0	0	0	0	0	0	0	0	0	0	0	0	0	0	0	0	0	0	0	0
Otu1143	Prevotella	0	0	0	0	0	0	0	0	0	0	0	0	0	0	0	0	0	0	0	0	0	0	0	0	0	0	0	0	0	0	0	0	0	0	0	0	0	0	0	0	0	0	0	0	0	0	0.000175167	0
Otu1144	Unclassified Bacteroidales	0	0	0	0	0	0	0	0	0	0	0	0	0	0	0	0	0	0	0	0	0	0	0	0	0	0	0	0	0	0	0	0	0	0	0	0	0	0	0	0	0	0	0	0	0	0	0	0
Otu1145	Unclassified Rhizobiales	0	0	0	0	0	0	0	0	0	0	0	0	0	0	0	0	0	0	0	0	2.77917e-05	0	0	0	0	0	0	0	0	0	0	0	0	0	0	0	0	0	0	0	0	0	0	0	0	0	0	0
Otu1146	Unclassified Proteobacteria	0	0	0	0	0	0	0	0	0	0	0	0	0	0	0	0	0	9.68085e-05	0	0	0	0	0	0	0	0	0	0	0	0	0	0	0	0	0	0	0	0	0	0	0	0	0	0	0	0	0	0
Otu1147	Unclassified Rhizobiales	0	0	0	0	0	0	0	0	0	0	0	0	0	0	0	0	0	6.4539e-05	0	0	0	0	0	0	0	0	0	0	0	0	0	0	0	0	0	0	0	0	0	0	0	0	0	0	0	0	0	0
Otu1148	Winogradskyella	0	0	0	0	0	0	0	0	0	0	0	0	0	0	0	0	0	0	0	0	2.77917e-05	0	0	0	0	0	0	0	0	0	0	0	0	0	0	0	0	0	0	0	0	0	0	0	0	0	0	0
Otu1149	Unclassified Lachnospiraceae	0	0	0	0	0	0	0	0	0	0	0	0	0	0	0	0	0	0	0	0	0	0	0	0	0	0	0	0	0	0	0	0	0	0	0	0	0	0	0	0	0	0	0	0	0	0	0	0
Otu1150	Unclassified Clostridiaceae_1	0	0	0	0	0	0	0	0	0	0	0	0	0	0	0	0	0	0	0	0	0	0	0	0	0	0	0	0	0	0	0	0	0	0	0	0	0	0	0	0	1.93211e-05	0	0	0	0	0	0	0
Otu1151	Unclassified Betaproteobacteria	0	0	0	0	0	0	0	0	0	0	0	0	0	0	0	0	0	0	0	0	0	0	0	0	0	0	0	0	0	0	0	0	0	0	0	0	0	0	0	0	1.93211e-05	0	0	0	0	0	0	0
Otu1152	Unclassified Rhizobiales	0	0	0	0	0	0	0	0	0	0	0	0	0	0	0	0	0	9.68085e-05	0	0	0	0	0	0	0	0	0	0	0	0	0	0	0	0	0	0	0	0	0	0	0	0	0	0	0	0	0	0
Otu1153	Unclassified Bacteria	0	0	0	0	0	0	0	0	0	0	0	0	0	0	0	0	0	0	0	0	0	0	0	3.97931e-05	0	0	0	0	0	0	3.92989e-05	0	0	0	0	0	0	0	0	0	0	0	0	0	0	0	0	0
Otu1154	Bradyrhizobium	0	0	0	0	0	0	0	0	0	0	0	0	0	0	0	0	0	0	0	0	0	0	0	0	0	0	0	0	0	0	3.92989e-05	0	0	0	0	0	0	0	0	0	0	0	0	0	0	0	0	0
Otu1155	Unclassified Bacteria	0	0	0	0	0	0	0	0	0	0	0	0	0	0	0	0	0	0	0	0	0	0	0	0	0	0	0	0	0	0	0	0	0	0	0	0	0	0	0	0	0	0	0	0	9.42418e-05	0	0	0
Otu1156	Unclassified Bacteria	0	0	0	0	0	0	0	0	0	0	0	0	0	0	0	0	0	0	0	0	2.77917e-05	0	0	0	0	0	0	0	0	0	0	0	0	0	0	0	0	0	0	0	0	0	0	0	0	0	0	0
Otu1157	Unclassified Bacteria	0	0	0	0	0	0	0	0	0	0	0	0	0	0	0	0	0	3.22695e-05	0	0	0	0	0	0	0	0	0	0	0	0	0	0	0	0	0	0	0	0	0	0	0	0	0	0	0	0	0	0
Otu1158	Unclassified Betaproteobacteria	0	0	0	0	0	0	0	0	0	0	0	0	0	0	0	0	0	0	0	0	0	0	0	0	0	0	0	0	0	0	0	0	0	0	0	0	0	0	0	0	0	0	0	0	4.71209e-05	0	0	0
Otu1159	Unclassified Burkholderiales	0	0	0	0	0	0	0	0	0	0	0	0	0	0	0	0	0	0	0	0	0	0	0	0	0	0	0	0	0	0	0	0	0	0	0	0	0	0	0	0	1.93211e-05	0	0	0	0	0	0	0
Otu1160	Unclassified Myxococcales	0	0.000119546	0	0	0	0	0	0	0	0	0	0	0	0	0	0	0	3.22695e-05	0	0	0	0	0	0.000159172	0	0	0	0	0	0	0	0	0	0	0	0	0	0	0	0	0	0	0	0	0	0	0	0
Otu1161	Skermanella	0	0	0	0	0	0	0	0	0	0	0	0	0	0	0	0	0	0	0	0	0	0	0	0	0	0	0	0	0	0	0	0	0	0	0	0	0	0	0	0	1.93211e-05	0	0	0	0	0	0	0
Otu1162	Unclassified Bacteria	0	0	0	0	0	0	0	0	0	0	0	0	0	0	0	0	0	0	0	0	0	0	0	0	0	0	0	0	0	0	0	0	0	0	0	0	0	0	0	0	3.86421e-05	0	0	0	0	0	0	0
Otu1163	Unclassified Firmicutes	0	0	0	0	0	0	0	0	0	0	0	0	0	0	0	0	0	0	0	0	0	0	0	0	0	0	0	0	0	0	0	0	0	0	0	0	0	0	0	0	1.93211e-05	0	0	0	0	0	0	0
Otu1164	Unclassified Sphingomonadales	0	0	0	0	0	0	0	0	0	0	0	0	0	0	0	0	0	0	0	0	0	0	0	0	0	0	0	0	0	0	0	0	0	0	0	0	0	0	0	0	5.79632e-05	0	0	0	0	0	0	0
Otu1165	Unclassified Proteobacteria	0	0	0	0	0	0	0	0	0	0	0	2.93574e-05	0	0	0	0	0	0	0	0	0	0	0	0	0	0	0	0	0	0	0	0	0	0	0	0	0	0	0	0	0	0	0	0	0	0	0	0
Otu1166	Unclassified Actinomycetales	0	0	0	0	0	0	0	0	0	0	0	0	0	0	0	0	7.75134e-05	0	0	0	0	0	0	0	0	0	0	0	0	0	0	0	0	0	0	0	0	0	0	0	0	0	0	0	0	0	0	0
Otu1167	Unclassified Actinomycetales	0	0	0	0	0	0	0	0	0	0	0	0	0	0	0	0	0	0	0	0	0	0	0	0	0	0	0	0	0	0	0	0	0	0	0	0	0	0	0	0	0	0	0	0	4.71209e-05	0	0	0
Otu1168	Unclassified Bacteria	0	0	0	0	0	0	0	0	0	0	0	0	0	0	0	0	0	9.68085e-05	0	0	0	0	0	0	0	0	0	0	0	0	0	0	0	0	0	0	0	0	0	0	0	0	0	0	0	0	0	0
Otu1169	Sphingosinicella	0	0	0	0	0	0	0	0	0	0	0	0	0	0	0	0	0	0	0	0	0	0	0	0	0	0	0	0	0	0	0	0	0	0	0	0	0	0	0	0	0	0	0	0	0	0	0	0
Otu1170	Subdoligranulum	0	0	0	0	0	0	0	0	0	0	0	0	0	0	0	0	0	3.22695e-05	0	0	0	0	0	0	0	0	0	0	0	0	0	0	0	0	0	0	0	0	0	0	0	0	0	0	0	0	0	0
Otu1171	Unclassified Clostridiales	0	0	0	0	0	0	0	0	0	0	0	0	0	0	0	0	0	3.22695e-05	0	0	0	0	0	0	0	0	0	0	0	0	0	0	0	0	0	0	0	0	0	0	0	0	0	0	0	0	0	0
Otu1172	Unclassified Betaproteobacteria	0	0	0	0	0	0	0	0	0	0	0	0	0	0	0	0	0	0	0	0	0	0	0	0	0	0	0	0	0	0	0	0	0	0	0	0	0	0	0	0	0	0	0	0	9.42418e-05	0	0	0
Otu1173	Methylobacillus	0	0	0	0	0	0	0	0	0	0	0	0	0	0	0	0	0	6.4539e-05	0	0	0	0	0	0	0	0.000939967	2.9391e-05	0	0	7.65374e-05	0	0.000118224	0	0	0	0	0	0	0	0	0	0	0	0	0	0	0	0
Otu1174	Unclassified Actinomycetales	0	0	0	0	0	0	0	0	0	0	0	0	0	0	0	0	0	0	0	0	0	0	0	0	0	0	0	0	0	0	0	0	0	0	0	0	0	0	0	0	0	0	0	0	0	0	0	0
Otu1175	Unclassified Bacteria	0	0	0	0	0	0	0	0	0	0	0	0	0	0	0	0	0	0	0	0	0	0	0	0	2.91715e-05	0	0	0	0	0	0	0	0	0	0	0	0	0	0	0	0	0	0	0	0	0	0	0
Otu1176	Unclassified Lachnospiraceae	0	0	0	0	0	0	0	0	0	0	0	2.93574e-05	0	0	0	0	0	0	0	0	0	0	0	0	0	0	0	0	0	0	0	0	0	0	0	0	0	0	0	0	0	0	0	0	0	0	0	0
Otu1177	Unclassified Bacteria	0	0	0	0	0	0	0	0	0	0	0	0	0	0	0	0	0	0	0	0	0	0	0	0	2.91715e-05	0	0	0	0	0	0	0	0	0	0	0	0	0	0	0	0	0	0	0	0	0	0	0
Otu1178	Unclassified Bacteria	0	0	0	0	0	0	0	0	0	0	0	0	0	4.30274e-05	0	0	0	0	0	0	0	0	0	0	0	0	0	0	0	0	0	0	0	0	0	0	0	0	0	0	0	0	0	0	0	0	0	0
Otu1179	Spartobacteria_genera_incertae_sedis	0	0	0	0	0	0	0	0	0	0	0	0	0	0	0	0	0	0	0	0	0	0	0	0	0	0	0	0	0	0	0	0	0	0	0	0	0	0	0	0	0	0	0	0	0	0	0	0
Otu1180	Unclassified Alphaproteobacteria	0	0	0	0	0	0	0	0	0	0	0	0	0	0	0	0	3.87567e-05	0	0	0	0	0	0	0	0	0	0	0	0	0	0	0	0	0	0	0	0	0	0	0	0	0	0	0	0	0	0	0
Otu1181	Gemmata	0	0	0	0	0	0	0	0	0	0	0	0	0	0	0	0	0	0	0	0	0	0	0	0	0	0	0	0	0	0	0	0	0	0	0	0	0	0	0	0	0	0	0	0	0	0	0	0
Otu1182	Geobacter	0	0	0	0	0	0	0	0	0	0	0	0	0	0	0	0	0	0	0	0	0	0	0	0	0	0	0	0	0	0	0	0	0	0	0	0	0	0	0	0	0	0	0	0	0	0	0	0
Otu1183	Unclassified Desulfobulbaceae	0	0	0	0	0	0	0	0	0	0	0	0	0	0	0	0	0	0	0	0	0	0	0	0	0	0	0	0	0	0	0	0	0	0	0	0	0	0	0	0	0	0	0	0	0	0	0	0
Otu1184	Labrys	0	0	0	0	0	0	0	0	0	0	0	0	0	0	0	0	0	0	0	0	0	0	0	0	0	0	0	0	0	0	0	0	0	0	0	0	0	0	0	0	0	0	0	0	0	0	0	0
Otu1185	Bdellovibrio	0	0	0	0	0	0	0	0	0	0	0	0	0	0	0	0	0	0	0	0	0	0	8.04311e-05	0	0	0	0	0	0	0	0	0	0	0	0	0	0	0	0	0	0	0	0	0	0	0	0	0
Otu1186	Unclassified Proteobacteria	0	0	0	0	0	0	0	0	0	0	0	0	0	0	0	0	0	0	0	0	0	0	0	0	0	0	0	0	0	0	0	0	0	0	0	0	0	0	0	0	0	0	0	0	0	0	0	0
Otu1187	Unclassified Lachnospiraceae	0	0	0	0	0	0	0	0	0	0	0	0	0	0	0	0	0	0	0	0	0	0	0	0	0	0	0	0	0	0	0	0	0	0	0	0	0	0	0	0	0	0	0	0	0	0	0	0
Otu1188	Gp6	0	0	0	0	0	0	0	0	0	0	0	0	0	0	0	0	0	0	0	0	0	0	0	0	0	0	0	0	0	0	0	0	0	0	0	0	0	0	0	0	0	0	0	0	0	0	0	0
Otu1189	Unclassified Alphaproteobacteria	0	0	0	0	0	0	0	0	0	0	0	0	0	0	0	0	0	0	0	0	0	0	0	0	0	0	0	0	0	0	0	0	0	0	0	0	0	0	0	0	0	0	0	0	0	0	0	0
Otu1190	3_genus_incertae_sedis	0	0	0	0	0	0	0	0	0	0	0	0	0	0	0	0	0	0	0	0	0	0	0	0	0	0	0	0	0	0	0	0	0	0	0	0	0	0	0	0	0	0	0	0	0	0	0	0
Otu1191	Gp3	0	0	0	0	0	0	0	0	0	0	0	0	0	0	0	0	0	0	0	0	0	0	0	0	0	0	0	0	0	0	0	0	0	0	0	0	0	0	0	0	0	0	0	0	0	0	0	0
Otu1192	Gp4	0	0	0	0	0	0	0	0	0	0	0	0	0	0	0	0	0	0	0	0	0	0	0	0	0	0	0	0	0	0	0	0	0	0	0	0	0	0	0	0	0	0	0	0	0	0	0	0
Otu1193	Unclassified Bacteria	0	0	0	0	0	0	0	0	0	0	0	0	0	0	0	0	0	0	0	0	0	0	0	0	0	0	0	0	0	0	0	0	0	0	0	0	0	0	0	0	0	0	0	0	0	0	0	0
Otu1194	Unclassified Gammaproteobacteria	0	0	0	0	0	0	0	0	0	0	0	0	0	0	0	0	0	0	0	0	0	0	4.02156e-05	0	0	0	0	0	0	0	0	0	0	0	0	0	0	0	0	0	0	0	0	0	0	0	0	0
Otu1195	Unclassified Bacteria	0	0	0	0	0	0	0	0	0	0	0	0	0	0	0	0	0	0	0	0	0	0	0	0	0	0	0	0	0	0	0	0	0	0	0	0	0	0	0	0	0	0	0	0	0	0	0	0
Otu1196	Unclassified Bacteria	0	0	0	0	0	0	0	0	0	0	0	0	0	0	0	0	0	0	0	0	0	0	0	0	0	0	0	0	0	0	0	0	0	0	0	0	0	0	0	0	0	0	0	0	0	0	0	0
Otu1197	Unclassified Bacteria	0	0	0	0	0	0	0	0	0	0	0	0	0	0	0	0	0	0	0	0	0	0	0	0	0	0	0	0	0	0	0	0	0	0	0	0	0	0	0	0	0	0	0	0	0	0	0	0
Otu1198	Hyphomicrobium	0	0	0	0	0	0	0	0	0	0	0	0	0	0	0	0	0	0	0	0	0	0	0	0	0	0	0	0	0	0	0	0	0	0	0	0	0	0	0	0	0	0	0	0	0	0	0	0
Otu1199	Unclassified Proteobacteria	0	0	0	0	0	0	0	0	0	0	0	0	0	4.30274e-05	0	0	0	0	0	0	0	0	0	0	0	0	0	0	0	0	0	0	0	0	0	0	0	0	0	0	0	0	0	0	0	0	0	0
Otu1200	Unclassified Polyangiaceae	0	0	0	0	0	0	0	0	0	0	0	0	0	0	0	0	0	0	0	0	0	0	0	0	0	0	0	0	0	0	0	0	0	0	0	0	0	0	0	0	0	0	0	0	0	0	0	0
Otu1201	Ktedonobacter	0	0	0	0	0	0	0	0	0	0	0	0	0	0	0	0	0	0	0	0	0	0	0	0	0	0	0	0	0	0	0	0	0	0	0	0	0	0	0	0	0	0	0	0	0	0	0	0
Otu1202	Gp1	0	0	0	0	0	0	0	0	0	0	0	0	0	0	0	0	0	0	0	0	0	0	0	0	0	0	0	0	0	0	0	0	0	0	0	0	0	0	0	0	0	0	0	0	0	0	0	0
Otu1203	Unclassified Bacteria	0	0	0	0	0	0	0	0	0	0	0	0	0	0	0	0	0	0	0	0	0	0	0	0	0	0	0	0	0	0	0	0	0	0	0	0	0	0	0	0	0	0	0	0	0	0	0	0
Otu1204	Clostridium_XlVa	0	0	0	0	0	0	0	0	0	3.26232e-05	0	0	0	0	0	0	0	0	0	0	0	0	0	0	0	0	0	0	0	0	0	0	0	0	0	0	0	0	0	0	0	0	0	0	0	0	0	0
Otu1205	Unclassified Proteobacteria	0	0	0	0	0	0	0	0	0	0	0	0	0	0	0	0	0	0	0	0	0	0	0	0	0	0	0	0	0	0	0	0	0	0	0	0	0	0	0	0	0	0	0	0	0	0	0	0
Otu1206	Unclassified Verrucomicrobia	0	0	0	0	0	0	0	0	0	0	0	0	0	0	0	0	0	0	0	0	0	0	0	0	0	0	0	0	0	0	0	0	0	0	0	0	0	0	0	0	0	0	0	0	0	0	0	0
Otu1207	Unclassified Bacteria	0	0	0	0	0	0	0	0	0	0	0	0	0	0	0	0	0	0	0	0	0	0	0	0	0	0	0	0	0	0	0	0	0	0	0	0	0	0	0	0	0	0	0	0	0	0	0	0
Otu1208	Unclassified Bacteroidetes	0	0	0	0	0	0	0	0	0	0	0	0	0	0	0	0	0	0	0	0	0	0	0	0	0	0	0	0	0	0	0	0	0	0	0	0	0	0	0	0	0	0	0	0	0	0	0	0
Otu1209	Unclassified Proteobacteria	0	0	0	0	0	0	0	0	0	0	0	0	0	0	0	0	0	0	0	0	0	0	0	0	0	0	0	0	0	0	0	0	0	0	0	0	0	0	0	0	0	0	0	0	0	0	0	0
Otu1210	Sphingomonas	0	0	0	0	0	0	0	0	0	0	0	0	0	0	0	0	0	0	0	0	0	0	0.000120647	0	0	0	0	0	0	0	0	0	0	0	0	0	0	0	0	0	0	0	0	0	0	0	0	0
Otu1211	Unclassified Myxococcales	0	0	0	0	0	0	0	0	0	0	0	0	0	0	0	0	0	0	0	0	0	0	0	0	0	0	0	0	0	0	0	0	0	0	0	0	0	0	0	0	0	0	0	0	0	0	0	0
Otu1212	Unclassified Betaproteobacteria	0	0	0	0	0	0	0	0	0	0	0	0	0	0	0	0	0	0	0	0	0	0	0	0	0	0	0	0	0	0	0	0	0	0	0	0	0	0	0	0	0	0	0	0	0	0	0	0
Otu1213	Unclassified Flavobacteriaceae	0	0	0	0	0	0	0	0	0	0	0	0	0	0	0	0	0	0	0	0	0	0	4.02156e-05	0	0	0	0	0	0	0	0	0	0	0	0	0	0	0	0	0	0	0	0	0	0	0	0	0
Otu1214	Unclassified Bacteria	0	0	0	0	0	0	0	0	0	0	0	0	0	0	0	0	0	0	0	0	0	0	0	0	0	0	0	0	0	0	0	0	0	0	0	0	0	0	0	0	0	0	0	0	0	0	0	0
Otu1215	Sphingopyxis	0	0	0	0	0	0	0	0	0	6.52465e-05	0	0	0	0	0	0.000139205	0	0	0	0	0	0	0	0	0	0	0	0	0	0	0	0	0	0	0	0	0	0	0	0	0	0	0	0	0	0	0	0
Otu1216	Unclassified Gammaproteobacteria	0	0	0	0	0	0	0	0	0	0	0	0	0	0.000344219	0	0	0	0	0	0	0	0	0	0	0	0	0	0	0	0	0	0	0	0	0	0	0	0	0	0	0	0	0	0	0	0	0	0
Otu1217	Geothrix	0	0	0	0	0	0	0	0	0	0	0	0	0	0	0	0	0	0	0	0	0	0	4.02156e-05	0	0	0	0	0	0	0	0	0	0	0	0	0	0	0	0	0	0	0	0	0	0	0	0	0
Otu1218	Ferruginibacter	0	0	0	0	0	0	0	0	0	0	0	0	0	0	0	0	0	0	0	0	0	0	0	0	0	0	0	0	0	0	0	0	0	0	0	0	0	0	0	0	0	0	0	0	0	0	0	0
Otu1219	Rhizobium	0	0	0	0	0	0	0	0	0	0	0	0	0	0	0	0	0	0	0	0	0	0	0	0	0	0	0	0	0	0	0	0	0	0	0	0	0	0	0	0	0	0	0	0	0	0	0	0
Otu1220	Unclassified Bacteria	0	0	0	0	0	0	0	0	0	0	0	0	0	0	0	0	0	0	0	0	0	0	0	0	0	0	0	0	0	0	0	0	0	0	0	0	0	0	0	0	0	0	0	0	0	0	0	0
Otu1221	Unclassified Clostridiaceae_1	0	0	0	0	0	0	0	0	0	0	0	0	0	0	0	0	0	0	0	0	0	0	0	0	0	0	0	0	0	0	0	0	0	0	0	0	0	0	0	0	0	0	0	0	0	0	0	0
Otu1222	Gp1	0	0	0	0	0	0	0	0	0	0	0	0	0	0	0	0	0	0	0	0	0	0	0	0	0	0	0	0	0	0	0	0	0	0	0	0	0	0	0	0	0	0	0	0	0	0	0	0
Otu1223	Unclassified Rhizobiales	0	0	0	0	0	0	0	0	0	0	0	0	0	0	0	0	0	0	0	0	0	0	0	0	0	0	0	0	0	0	0	0	0	0	0	0	0	0	0	0	0	0	0	0	0	0	0	0
Otu1224	Unclassified Bacteroidetes	0	0	0	0	0	0	0	0	0	0	0	0	0	8.60548e-05	0	0	0	0	0	0	0	0	0	0	0	0	0	0	0	0	0	0	0	0	0	0	0	0	0	0	0	0	0	0	0	0	0	0
Otu1225	Unclassified Alphaproteobacteria	0	0	0	0	0	0	0	0	0	0	0	0	0	0	0	0	0	0	0	0	0	0	0	0	0	0	0	0	0	0	0	0	0	0	0	0	0	0	0	0	0	0	0	0	0	0	0	0
Otu1226	Unclassified Bacteria	0	0	0	0	0	0	0	0	0	0	0	0	0	0	0	0	0	0	0	0	0	0	0	0	2.91715e-05	0	0	0	0	0	0	0	0	0	0	0	0	0	0	0	0	0	0	0	0	0	0	0
Otu1227	Unclassified Rhodocyclaceae	0	0	0	0	0	0	0	0	0	0	0	0	0	0	0	0	0	0	0	0	0	0	0	0	0	0	0	0	0	0	0	0	0	0	0	0	0	0	0	0	0	0	0	0	0	0	0	0
Otu1228	Unclassified Thermomonosporaceae	0	0	0	0	0	0	0	0	0	0	0	0	0	0	0	0	0	0	0	0	0	0	0	0	0	0	0	0	0	0	0	0	0	0	0	0	0	0	0	0	0	0	0	0	0	0	0	0
Otu1229	Unclassified Chloroflexi	0	0	0	0	0	0	0	0	0	0	0	0	0	0	0	0	0	0	0	0	0	0	0	0	0	0	0	0	0	0	0	0	0	0	0	0	0	0	0	0	0	0	0	0	0	0	0	0
Otu1230	Spartobacteria_genera_incertae_sedis	0	0	0	0	0	0	0	0	0	0	0	0	0	0	0	0	0	0	0	0	0	0	0	0	0	0	0	0	0	0	0	0	0	0	0	0	0	0	0	0	0	0	0	0	0	0	0	0
Otu1231	Unclassified Bacteria	0	0	0	0	0	0	0	0	0	0	0	0	0	0	0	0	0	0	0	0	0	0	0	0	0	0	0	0	0	0	0	0	0	0	0	0	0	0	0	0	0	0	0	0	0	0	0	0
Otu1232	Unclassified Alphaproteobacteria	0	0	0	0	0	0	0	0	0	0	0	0	0	0	0	0	0	0	0	0	0	0	0	0	0	0	0	0	0	0	0	0	0	0	0	0	0	0	0	0	0	0	0	0	0	0	0	0
Otu1233	Unclassified Chitinophagaceae	0	0	0	0	0	0	0	0	0	0	0	0	0	0	0	0	0	0	0	0	0	0	0	0	0	0	0	0	0	0	0	0	0	0	0	0	0	0	0	0	0	0	0	0	0	0	0	0
Otu1234	Unclassified Bacteria	0	0	0	0	0	0	0	0	0	0	0	0	0	0	0	0	0	0	0	0	0	0	0	0	0	0	0	0	0	0	0	0	0	0	0	0	0	0	0	0	0	0	0	0	0	0	0	0
Otu1235	Unclassified Acetobacteraceae	0	0	0	0	0	0	0	0	0	0	0	0	0	0	0	0	0	0	0	0	0	0	0	0	0	0	0	0	0	0	0	0	0	0	0	0	0	0	0	0	0	0	0	0	0	0	0	0
Otu1236	Unclassified Planctomycetaceae	0	0	0	0	0	0	0	0	0	0	0	0	0	0	0	0	0	0	0	0	0	0	0	0	0	0	0	0	0	0	0	0	0	0	0	0	0	0	0	0	0	0	0	0	0	0	0	0
Otu1237	Planococcaceae_incertae_sedis	0	0	0	0	0	0	0	0	0	0	0	0	0	0	0	0	0	0	0	0	0	0	0	0	0	0	0	0	0	0	0	0	0	0	0	0	0	0	0	0	0	0	0	0	0	0	0	0
Otu1238	Gp1	0	0	0	0	0	0	0	0	0	0	0	0	0	0	0	0	0	0	0	0	0	0	0	0	0	0	0	0	0	0	0	0	0	0	0	0	0	0	0	0	0	0	0	0	0	0	0	0
Otu1239	Gemmata	0	0	0	0	0	0	0	0	0	0	0	0	0	0	0	0	0	0	0	0	0	0	0	0	0	0	0	0	0	0	0	0	0	0	0	0	0	0	0	0	0	0	0	0	0	0	0	0
Otu1240	Unclassified Sphingobacteriaceae	0	0	0	0	0	0	0	5.99341e-05	0	0	0	0	0	0	0	0	0	0	0	0	0	0	0	3.97931e-05	0	0	0	0	0	0	0	0	0	0	0	0	0	0	0	0	0	0	0	0	0	0	0	0
Otu1241	Gp2	0	0	0	0	0	0	0	0	0	0	0	0	0	0	0	0	0	0	0	0	0	0	0	0	0	0	0	0	0	0	0	0	0	0	0	0	0	0	0	0	0	0	0	0	0	0	0	0
Otu1242	Unclassified Comamonadaceae	0	0	0	0	0	0	0	2.9967e-05	0	0	0	0	0	0	0	0	0	0	0	0	0	0	0	0	0	0	0	0	0	0	0	0	0	0	0	0	0	0	0	0	0	0	0	0	0	0	0	0
Otu1243	Unclassified Bacteroidetes	0	0	0	0	0	0	0	0	0	0	0	0	0	0	0	0	0	0	0	0	0	0	0	0	0	0	0	0	0	0	0	0	0	0	0	0	0	0	0	0	0	0	0	0	0	0	0	0
Otu1244	Planctomyces	0	0	0	0	0	0	0	2.9967e-05	0	0	0	0	0	0	0	0	3.87567e-05	0	0	0	0	0	0	7.95862e-05	0	0	0	0	0	0	0	0	0	0	0	0	0	0	0	8.017e-05	5.79632e-05	0	0	0	0	0	0	0
Otu1245	Unclassified Bacteria	0	0	0	0	0	0	0	0	0	0	0	0	0	0	0	0	0	0	0	0	0	0	0	0	0	0	0	0	0	0	0	0	0	0	0	0	0	0	0	0	0	0	0	0	0	0	0	0
Otu1246	Unclassified Parachlamydiaceae	0	0	5.8931e-05	0	0	0	0	0	0	0	0	0	0	4.30274e-05	0	0	0	0	0	0	0	8.22064e-05	0	0	0	0	0	0	0	0	0	0	0	0	0	0	0	0	0	0	0	0	0	0	0	0	0	0
Otu1247	Unclassified Burkholderiales	0	0	0	0	0	0	0	0	0	0	0	0	0	0	0	0	0	0	0	0	0	0	0	0	0	0	0	0	0	0	0	0	0	0	0	0	0	0	0	0	0	0	0	0	0	0	0	0
Otu1248	Unclassified Actinobacteria	0	0	0	0	0	0	0	0	0	0	0	0	0	0	0	0	0	0	0	0	0	0	0	0	0	0	0	0	0	0	0	0	0	0	0	0	0	0	0	0	0	0	0	0	0	0	0	0
Otu1249	Unclassified Bacteria	0	0	0	0	0	0	0	0	0	0	0	0	0	0	0	0	0	0	0	0	0	0	0	0	0	0	0	0	0	0	0	0	0	0	0	0	0	0	0	0	0	0	0	0	0	0	0	0
Otu1250	Campylobacter	0	0	0	0	0	0	0	0	0	0	0	0	0	0	0	0	0	0	0	0	0	0	0	0	0	0	0	0	0	0	0	0	0	0	0	0	0	0	0	0	0	0	0	0	0	0	0	0
Otu1251	Zavarzinella	0	0	0	0	0	0	0	0	0	0	0	0	0	0	0	0	0	0	0	0	0	0	0	0	0	0	0	0	0	0	0	0	0	0	0	0	0	0	0	0	0	0	0	0	0	0	0	0
Otu1252	Gp6	0	0	0	0	0	0	0	0	0	0	0	0	0	0	0	0	0	0	0	0	0	0	0	0	0	0	0	0	0	0	0	0	0	0	0	0	0	0	0	0	0	0	0	0	0	0	0	0
Otu1253	Gp1	0	0	0	0	0	0	0	0	0	0	0	0	0	0	0	0	0	0	0	0	0	0	0	0	0	0	0	0	0	0	0	0	0	0	0	0	0	0	0	0	0	0	0	0	0	0	0	0
Otu1254	Gemmata	0	0	0	0	0	0	0	0	0	0	0	0	0	0	0	0	0	0	0	0	0	0	0	0	0	0	0	0	0	0	0	0	0	0	0	0	0	0	0	0	0	0	0	0	0	0	0	0
Otu1255	Unclassified Bacteria	0	0	0	0	0	0	0	0	0	0	0	0	0	0	0	0	0	0	0	0	0	0	0	0	2.91715e-05	0	0	0	0	0	0	0	0	0	0	0	0	0	0	0	0	0	0	0	0	0	0	0
Otu1256	Phenylobacterium	0	0	0	0	0	0	0	0	0	0	0	0	0	0	0	0	0	0	0	0	0	0	0	0	0	0	0	0	0	0	0	0	0	0	0	0	0	0	0	0	0	0	0	0	0	0	0	0
Otu1257	Gp3	0	0	0	0	0	0	0	0	0	0	0	0	0	0	0	0	0	0	0	0	0	0	0	0	0	0	0	0	0	0	0	0	0	0	0	0	0	0	0	0	0	0	0	0	0	0	0	0
Otu1258	Unclassified Proteobacteria	0	0	0	0	0	0	0	0	0	0	0	0	0	0	0	0	0	0	0	0	0	0	0	0	0	0	0	0	0	0	0	0	0	0	0	0	0	0	0	0	0	0	0	0	0	0	0	0
Otu1259	Anaerorhabdus	0	0	0	0	0	0	0	2.9967e-05	0	0	0	0	0	0	0	0	0	0	0	0	2.77917e-05	0	0	0	0	0	0	0	0	0	0	0	0	0	0	0	0	0	0	0	0	0	0	0	0	0	0	0
Otu1260	Unclassified Bacteria	0	0	0	0	0	0	0	2.9967e-05	0	0	0	0	0	0	0	0	0	0	0	0	0	0	0	0	0	0	0	0	0	0	0	0	0	0	0	0	0	0	0	0	0	0	0	0	0	0	0	0
Otu1261	Unclassified Betaproteobacteria	0	0	5.8931e-05	0	0	0	0	5.99341e-05	0	0	0	0	0	0	0	0	0	0	0	0	0	0.000164413	0	0	0	0	0	0	0	0	0	0	0	0	0	0	0	0	0	0	0	0	0	0	0	0	0	0
Otu1262	Unclassified Proteobacteria	0	0	0	0	0	0	0	0	0	0	0	0	0	0	0	0	0	0	0	0	0	0	0	0	5.83431e-05	0	0	0	0	0	0	0	0	0	0	0	0	0	0	0	0	0	0	0	0	0	0	0
Otu1263	3_genus_incertae_sedis	0	0	0	0	0	0	0	0	0	0	0	0	0	0	0	0	0	0	0	0	0	0	0	0	0	0	0	0	0	0	0	0	0	0	0	0	0	0	0	0	0	0	0	0	0	0	0	0
Otu1264	Haloferula	0	0	0	0	0	0	0	0	0	0	0	0	0	4.30274e-05	0	0	0	0	0	0	0	0	0	0	0	0	0	0	0	0	0	0	0	0	0	0	0	0	0	0	0	0	0	0	0	0	0	0
Otu1265	Gp7	0	0	0	0	0	0	0	0	0	0	0	0	0	0	0	0	0	0	0	0	0	0	0	0	0	0	0	0	0	0	0	0	0	0	0	0	0	0	0	0	0	0	0	0	0	0	0	0
Otu1266	Unclassified Deltaproteobacteria	0	0	0	0	0	0	0	0	0	0	0	5.87147e-05	0	0	0	0	0	0	0	0	0	0	0	0	0	0	0	0	0	0	0	0	0	0	0	0	0	0	0	0	0	0	0	0	0	0	0	0
Otu1267	Unclassified Comamonadaceae	0	0	0	0	0	0	0	0	0	0	0	0	0	0	0	0	3.87567e-05	0	0	0	0	0	0	0	0	0	0	0	0	0	0	0	0	0	0	0	0	0	0	0	0	0	0	0	0	0	0	0
Otu1268	Unclassified Alphaproteobacteria	0	0	0	0	0	0	0	0	0	0	0	0	0	0	0	0	0	0	0	0	0	0	8.04311e-05	0	0	0	0	0	0	0	0	0	0	0	0	0	0	0	0	0	0	0	0	0	0	0	0	0
Otu1269	3_genus_incertae_sedis	0	0	0	0	0	0	0	0	0	0	0	0	0	0	0	0	0	0	0	0	0	0	0	0	0	0	0	0	0	0	0	0	0	0	0	0	0	0	0	0	0	0	0	0	0	0	0	0
Otu1270	Unclassified Rhizobiales	0	0	0	0	0	0	0	0	0	0	0	0	0	0	0	0	0	0	0	0	0	0	0	0	0	0	0	0	0	0	0	0	0	0	0	0	0	0	0	0	0	0	0	0	0	0	0	0
Otu1271	Unclassified Sphingobacteriales	0	0	0	0	0	0	0	0	0	0	0	2.93574e-05	0	0	0	0	0	0	0	0	0	0	0	0	0	0	0	0	0	0	0	0	0	0	0	0	0	0	0	0	0	0	0	0	0	0	0	0
Otu1272	Unclassified Bacteria	0	0	0	0	0	0	0	0	0	0	0	0	0	0	0	0	0	0	0	0	0	0	0	0	0	0	0	0	0	0	0	0	0	0	0	0	0	0	0	0	0	0	0	0	0	0	0	0
Otu1273	Unclassified Myxococcales	0	0	0	0	0	0	0	0	0	0	0	0	0	0	0	0	0	0	0	0	0	0	0	0	0	0	0	0	0	0	0	0	0	0	0	0	0	0	0	0	0	0	0	0	0	0	0	0
Otu1274	Unclassified Bacteria	0	0	0	0	0	0	0	0	0	0	0	0	0	0	0	0	0	0	0	0	0	0	0	0	0	0	0	0	0	0	0	0	0	0	0	0	0	0	0	0	0	0	0	0	0	0	0	0
Otu1275	Gp1	0	0	0	0	0	0	0	0	0	0	0	0	0	0	0	0	0	0	0	0	0	0	0	0	0	0	0	0	0	0	0	0	0	0	0	0	0	0	0	0	0	0	0	0	0	0	0	0
Otu1276	Unclassified Alphaproteobacteria	0	0	0	0	0	0	0	0	0	0	0	0	0	0	0	0	0	0	0	0	0	0	8.04311e-05	0	0	0	0	0	0	0	0	0	0	0	0	0	0	0	0	0	0	0	0	0	0	0	0	0
Otu1277	Unclassified Proteobacteria	0	0	0	0	0	0	0	0	0	0	0	2.93574e-05	0	0	0	0	0	0	0	0	0	0	0	0	0	0	0	0	0	0	0	0	0	0	0	0	0	0	0	0	0	0	0	0	0	0	0	0
Otu1278	Unclassified Xanthomonadaceae	0	0	0	0	0	0	0	0	0	0	0	0	0	0	0	0	0	0	0	0	0	0	0	0	0	0	0	0	0	0	0	0	0	0	0	0	0	0	0	0	0	0	0	0	0	0	0	0
Otu1279	Unclassified Proteobacteria	0	0	0	0	0	0	0	0	0	0	0	0	0	0	0	0	0	0	0	0	0	0	0	0	0	0	0	0	0	0	0	0	0	0	0	0	0	0	0	0	0	0	0	0	0	0	0	0
Otu1280	Unclassified Alphaproteobacteria	0	0	0	0	0	0	0	0	0	0	0	2.93574e-05	0	0	0	0	0	0	0	0	0	0	0	0	0	0	0	0	0	0	0	0	0	0	0	0	0	0	0	0	0	0	0	0	0	0	0	0
Otu1281	Gp7	0	0	0	0	0	0	0	0	0	0	0	0	0	0	0	0	0	0	0	0	0	0	0	0	0	0	0	0	0	0	0	0	0	0	0	0	0	0	0	0	0	0	0	0	0	0	0	0
Otu1282	Unclassified Bacteria	0	0	0	0	0	0	0	2.9967e-05	0	0	0	0	0	0	0	0	0	0	0	0	0	0	0	0	0	0	0	0	0	0	0	0	0	0	0	0	0	0	0	0	0	0	0	0	0	0	0	0
Otu1283	Unclassified Chitinophagaceae	0	0	0	0	0	0	0	0	0	0	0	0	0	0	0	0	0	0	0	0	0	0	0	0	0	0	0	0	0	0	0	0	0	0	0	0	0	0	0	0	0	0	0	0	0	0	0	0
Otu1284	Clostridium_sensu_stricto	0	0	0	0	0	0	0	0	0	0	0	0	0	0	0	0	0	0	0	0	0	0	0	0	0	0	0	0	0	0	0	0	0	0	0	0	0	0	0	0	0	0	0	0	0	0	0	0
Otu1285	Unclassified Bacteroidetes	0	0	0	0	0	0	0	0	0	0	0	0	0	0	0	0	0	0	0	0	0	0	0.000201078	0	0	0	0	0	0	0	0	0	0	0	0	0	0	0	0	0	0	0	0	0	0	0	0	0
Otu1286	Bosea	0	0	0	0	0	0	0	0	0	0	0	0	0	0	0	0	3.87567e-05	0	0	0	0	0	0	0	0	0	0	0	0	0	0	0	0	0	0	0	0	0	0	0	0	0	0	0	0	0	0	0
Otu1287	Unclassified Burkholderiales	0	0	0	0	0	0	0	0	0	0	0	0	0	0	0	0	0	0	0	0	0	0	0	0	0	0	0	0	0	0	0	0	0	0	0	0	0	0	0	0	0	0	0	0	0	0	0	0
Otu1288	Rhizomicrobium	0	0	0	0	0	0	0	0	0	0	0	0	0	0	0	0	0	0	0	0	0	0	0	0	0	0	0	0	0	0	0	0	0	0	0	0	0	0	0	0	0	0	0	0	0	0	0	0
Otu1289	Corynebacterium	0	0	0	0	0	0	0	0	0	0	0	0	0	0	0	0	0	0	0	0	0	0	0	0	0	0	0	0	0	0	0	0	0	0	0	0	0	0	0	0	0	0	0	0	0	0	0	0
Otu1290	Planctomyces	0	0	0	0	0	0	0	2.9967e-05	0	0	0	0	0	0	0	0	0	0	0	0	0	0	0	0	0	0	0	0	0	0	0	0	0	0	0	0	0	0	0	0	0	0	0	0	0	0	0	0
Otu1291	Gp6	0	0	0	0	0	0	0	0	0	0	0	0	0	0	0	0	0	0	0	0	0	0	0	0	0	0	0	0	0	0	0	0	0	0	0	0	0	0	0	0	0	0	0	0	0	0	0	0
Otu1292	OD1_genus_incertae_sedis	0	5.97729e-05	0	0	0	0	0	2.9967e-05	0	0	0	0	0	0	0	0	3.87567e-05	0	0	0	0	0	0	0	0	0	0	0	0	0	0	0	0	0	0	0	0	0	0	0	0	0	0	0	0	0	0	0
Otu1293	Gp3	0	0	0	0	0	0	0	0	0	0	0	0	0	0	0	0	0	0	0	0	0	0	0	0	0	0	0	0	0	0	0	0	0	0	0	0	0	0	0	0	0	0	0	0	0	0	0	0
Otu1294	Unclassified Rhodospirillaceae	0	0	0	0	0	0	0	0	0	0	0	0	0	0	0	0	0	0	0	0	0	0	0	0	0	0	0	0	0	0	0	0	0	0	0	0	0	0	0	0	0	0	0	0	0	0	0	0
Otu1295	OD1_genus_incertae_sedis	0	0	0	0	0	0	0	0	0	0	0	5.87147e-05	0	0	0	0	0	0	0	0	0	0	0	0	0	0	0	0	0	0	0	0	0	0	0	0	0	0	0	0	0	0	0	0	0	0	0	0
Otu1296	Unclassified Bacteria	0	0	0	0	0	0	0	0	0	0	0	0	0	0	0	0	0	0	0	0	0	0	0	0	0	0	0	0	0	0	0	0	0	0	0	0	0	0	0	0	0	0	0	0	0	0	0	0
Otu1297	Unclassified Planctomycetaceae	0	0	0	0	0	0	0	2.9967e-05	0	0	0	0	0	0	0	0	0	0	0	0	0	0	0	0	0	0	0	0	0	0	0	0	0	0	0	0	0	0	0	0	0	0	0	0	0	0	0	0
Otu1298	Arenicella	0	0	0	0	0	0	0	0	0	0	0	0	0	0	0	0	0	0	0	0	0	0	0	0	0	0	0	0	0	0	3.92989e-05	0	0	0	0	0	0	0	0	0	0	0	0	0	0	0	0	0
Otu1299	Unclassified Sphingomonadaceae	0	0	0	0	0	0	0	0	0	0	0	0	0	0	0	0	0	0	0	0	0	0	0	0	5.83431e-05	0	0	0	0	0	0	0	0	0	0	0	0	0	0	0	0	0	0	0	0	0	0	0
Otu1300	Gp16	0	0	0	0	0	0	0	0	0	0	0	0	0	0	0	0	0	0	0	0	0	0	0	0	0	0	0	0	8.49714e-05	0	0	0	0	0	0	0	0	0	0	0	0	0	0	0	0	0	0	0
Otu1301	Unclassified Bacteria	0	0	0	0	0	0	0	0	0	0	0	0	0	0	0	0	0	0	0	0	0	0	0	0	5.83431e-05	0	0	0	0	0	0	0	0	0	0	0	0	0	0	0	0	0	0	0	0	0	0	0
Otu1302	Unclassified Bacteria	0	0	5.8931e-05	0	0	0	0	0	0	0	0	0	0	0	0	0	0	0	0	0	0	0	0	0	0	0	0	0	0	0	0.000157196	0	0	0	0	0	0	6.2692e-05	0	0	0	0	0	0	0	0	0	0
Otu1303	Unclassified Comamonadaceae	0	0	0	0	0	0	0	0	0	0	0	0	0	0	0	0	0	0	0	0	0	0	0	0	0	0	0	0	0	0	0	0	0	0	0	0	0	0	3.03582e-05	0	0	0	0	0	0	0	0	0
Otu1304	Unclassified Bacteria	0	0	0	0	0	0	0	0	0	0	0	0	0	0	0	0	0	0	0	0	0	0	0	0	0	0	0	0	8.49714e-05	0	0	0	0	0	0	0	0	0	0	0	0	0	0	0	0	0	0	0
Otu1305	Unclassified Alphaproteobacteria	0	0	0	0	0	0	0	0	0	0	0	0	0	0	0	0	0	0	0	0	0	0	0	0	0	0	0	0	5.66476e-05	0	0	0	0	0	0	0	0	0	0	0	0	0	0	0	0	0	0	0
Otu1306	Unclassified Betaproteobacteria	0	0	0	0	0	0	0	0	0	0	0	0	0	0	0	0	0	0	0	0	0	0	0	0	0	0	0	0	0	0	0	0	0	0	0	0	0	0	3.03582e-05	0	0	0	0	0	0	0	0	0
Otu1307	Simkania	0	0	0	0	0	0	0	0	0	0	0	0	0	0	0	0	0	0	0	0	0	0	0	0	0	0	0	0	0	0	0.000117897	0	0	0	0	0	0	0	0	0	0	0	0	0	0	0	0	0
Otu1308	Unclassified Betaproteobacteria	0	0	0	0	0	0	0	0	0	0	0	0	0	0	0	0	0	0	0	0	0	0	0	0	8.75146e-05	0	0	0	0	0	0	0	0	0	0	0	0	0	0	0	0	0	0	0	0	0	0	0
Otu1309	Unclassified Bacteria	0	0	0	0	0	0	0	0	0	0	0	0	0	0	0	0	0	0	0	0	0	0	0	0	0	0	0	0	0	0	0	0	0	0	3.3557e-05	0	0	0	3.03582e-05	0	0	0	0	0	0	0	0	0
Otu1310	Unclassified Bacteria	0	0	0	0	0	0	0	0	0	0	0	0	0	0	0	0	0	0	0	0	0	0	0	0	0	0	0	0	0	0	0.000157196	0	0	0	0	0	0	0	0	0	0	0	0	0	0	0	0	0
Otu1311	Unclassified Bacteroidetes	0	0	0	0	0	0	0	0	0	0	0	0	0	0	0	0	0	0	0	0	0	0	0	0	2.91715e-05	0	0	0	0	0	0	0	0	0	0	0	0	0	0	0	0	0	0	0	0	0	0	0
Otu1312	Unclassified Bacteria	0	0	0	0	0	0	0	0	0	0	0	0	0	0	0	0	0	0	0	0	0	0	0	0	0	0	0	0	0	0	0	0	0	0	0	0	0	0	0	0	0	0	0	0	0	0	0	0
Otu1313	Unclassified Alcaligenaceae	0	0	0	0	0	0	0	0	0	3.26232e-05	0	0	0	0	0	0	0	0	0	0	0	0	0	0	0	0	0	0	0	0	0	0	0	0	0	0	0	0	0	0	0	0	0	0	0	0	0	0
Otu1314	Unclassified Betaproteobacteria	0	0	0	0	0	0	0	0	0	0	0	0	0	0	0	0	0	0	0	0	0	0	0	0	0	0	0	0	0	0	0	0	0	0	0	0	0	0	6.07165e-05	0	0	0	0	0	0	0	0	0
Otu1315	Unclassified Sphingobacteriales	0	0	0	0	0	0	0	0	0	0	0	0	0	0	0	0	0	0	0	0	0	0	0	0	0	0	0	0	0	0	0.000314391	0	0	0	0	0	0	0	0	0	0	0	0	0	0	0	0	0
Otu1316	Unclassified Burkholderiales	0	0	0	0	0	0	0	0	0	0	0	0	0	0	0	0	0	0	0	0	0	0	0	0	0	0	0	0	0	0	0	0	0	0	0	0	0	0	3.03582e-05	0	0	0	0	0	0	0	0	0
Otu1317	Unclassified Proteobacteria	0	0	0	0	0	0	0	0	0	0	0	0	0	0	0	0	0	0	0	0	0	0	0	0	0	0	0	0	0	0	0	0	0	0	0	0	0	0	0	0	0	0	0	0	0	0	0	0
Otu1318	Unclassified Rhizobiales	0	0	0	0	0	0	0	0	0	0	0	0	0	0	0	0	0	0	0	0	0	0	0	0	0	0	0	0	0	0	0	0	0	0	0	0	0	0	6.07165e-05	0	0	0	0	0	0	0	0	0
Otu1319	Unclassified Bacteria	0	0	0	0	0	0	0	0	0	0	0	0	0	0	0	0	0	0	0	0	0	0	0	0	0	0	0	0	0	0	0.000510886	0	0	0	0	0	0	0	0	0	0	0	0	0	0	0	0	0
Otu1320	Unclassified Bacteria	0	0	0	0	0	0	0	0	0	0	0	0	0	0	0	0	3.87567e-05	0	0	0	0	0	0	0	0	0	0	0	0	0	0	0	0	0	0	0	0	0	0	0	0	0	0	0	0	0	0	0
Otu1321	Unclassified Alcaligenaceae	0	0	0	0	0	0	0	0	0	0	0	0	0	0	0	0	0	0	0	0	0	0	0	0	0	0	0	0	0	0	0	0	0	0	0	0	0	0	6.07165e-05	0	0	0	0	0	0	0	0	0
Otu1322	Nitrospira	0	0	0	0	0	0	0	0	0	0	0	0	0	0	0	0	0	0	0	0	0	0	0	0	0	0	0	0	0	0	0	0	0	0	0	0	0	0	6.07165e-05	0	0	0	0	0	0	0	0	0
Otu1323	Unclassified Lachnospiraceae	0	0	0	0	0	0	0	0	0	3.26232e-05	0	0	0	0	0	0	0	0	0	0	0	0	0	0	0	0	0	0	0	0	0	0	0	0	0	0	0	0	0	0	0	0	0	0	0	0	0	0
Otu1324	Unclassified Betaproteobacteria	0	0	0	0	0	0	0	0	0	0	0	0	0	0	0	0	0	0	0	0	0	0	0	0	0	0	0	0	0	0	0	0	0	0	0	0	0	0	3.03582e-05	0	0	0	0	0	0	0	0	0
Otu1325	Unclassified Actinomycetales	0	0	0	0	0	0	0	0	0	6.52465e-05	0	0	0	0	0	0	0	0	0	0	0	0	0	0	0	0	0	0	0	0	0	0	0	0	0	0	0	0	0	0	0	0	0	0	0	0	0	0
Otu1326	Unclassified Bacteria	0	0	0	0	0	0	0	0	0	0	0	0	0	0	0	0	0	0	0	0	0	0	0	0	0	0	0	0	0	0	0	0	0	0	0	0	0	0	9.10747e-05	0	0	0	0	0	0	0	0	0
Otu1327	Unclassified Bacteria	0	0	0	0	0	0	0	0	0	3.26232e-05	0	0	0	0	0	0	0	0	0	0	0	0	0	0	0	0	0	0	0	0	0	0	0	0	0	0	0	0	0	0	0	0	0	0	0	0	0	0
Otu1328	Unclassified Bacteria	0	0	0	0	0	0	0	0	0	0	0	0	0	0	0	0	0	6.4539e-05	0	0	0	0	0	0	0	0	0	0	0	0	0	0	0	0	0	0	0	0	0	0	0	0	0	0	0	0	0	0
Otu1329	Unclassified Bacteroidetes	0	0	0	0	0	0	0	0	0	0	0	0	0	0	0	0	0	0	0	0	0	0	0	0	0.000320887	0	0	0	0	0	0	0	0	0	0	0	0	0	0	0	0	0	0	0	0	0	0	0
Otu1330	Unclassified Phyllobacteriaceae	0	0	0	0	0	0	0	0	0	0	0	0	0	0	0	0	0	0	0	0	0	0	0	0	0	0	0	0	0	0	0	0	0	0	0	0	0	0	0	4.0085e-05	0	0	0	0	0	0	0	0
Otu1331	Legionella	0	0	0	0	0	0	0	0	0	0	0	0	0	0	0	0	0	0	0	0	0	0	0	0	0	0	0	0	0	0	7.85978e-05	0	0	0	0	0	0	0	0	0	0	0	0	0	0	0	0	0
Otu1332	Unclassified Bacteria	0	0	0	0	0	0	0	0	0	0	0	0	0	0	0	0	0	0	0	0	0	0	0	0	0	0	0	0	2.83238e-05	0	0	0	0	0	0	0	0	0	0	0	0	0	0	0	0	0	0	0
Otu1333	Unclassified Actinomycetales	0	0	0	0	0	0	0	0	0	0	0	0	0	0	0	0	0	0	0	0	0	0	0	0	0	0	0	0	0	0	0.000157196	0	0	0	0	0	0	0	0	0	0	0	0	0	0	0	0	0
Otu1334	Sutterella	0	0	0	0	0	0	0	0	0	0	0	0	0	0	0	0	0	0	0	0	0	0	0	0	0	0	0	0	0	0	0	0	0	0	0	0	0	0	0	0	0	0	0	0	0	0	0	0
Otu1335	Truepera	0	0	0	0	0	0	0	0	0	0	0	0	0	0	0	0	0	0	0	0	0	0	0	0	0	0	0	0	0	0	0	0	0	0	0	0	0	0	0	0	0	0	0	0	0	0	0	0
Otu1336	Unclassified unclassified	0	0	0	0	0	0	0	0	0	0	0	0	0	0	0	0	0	0	0	0	0	0	0	0	0	0	0	0	2.83238e-05	0	0	0	0	0	0	0	0	0	0	0	0	0	0	0	0	0	0	0
Otu1337	Unclassified Bacteroidetes	0	0	0	0	0	0	0	0	0	0	0	0	0	0	0	0	3.87567e-05	0	0	0	0	0	0	0	0	0	0	0	0	0	0	0	0	0	0	0	0	0	0	0	0	0	0	0	0	0	0	0
Otu1338	Singulisphaera	0	0	0	0	0	0	0	0	0	0	0	0	0	0	0	0	0	0	0	0	0	0	0	0	0	0	0	0	0	0	0	0	0	0	0	0	0	0	0	8.017e-05	0	0	0	0	0	0	0	0
Otu1339	Unclassified Bacteria	0	0	0	0	0	0	0	0	0	0	0	0	0	0	0	0	0	3.22695e-05	0	0	0	0	0	0	0	0	0	0	0	0	0	0	0	0	0	0	0	0	0	0	0	0	0	0	0	0	0	0
Otu1340	Unclassified Bacteroidetes	0	0	0	0	0	0	0	0	0	0	0	0	0	0	0	0	0	0	0	0	0	0	0	0	0	0	0	0	0	0	0	0	0	0	0	0	0	0	0	8.017e-05	0	0	0	0	0	0	0	0
Otu1341	Unclassified Alphaproteobacteria	0	0	0	0	0	0	0	0	0	0	0	0	0	0	0	0	0	0	0	0	0	0	0	0	0	0	0	0	0	0	0	0	0	0	0	0	0	0	0	0.000120255	0	0	0	0	0	0	0	0
Otu1342	Bdellovibrio	0	0	0	0	0	0	0	0	0	0	0	0	0	0	0	0	0	0	0	0	0	0	0	0	0	0	0	0	0	0	3.92989e-05	0	0	0	0	0	0	0	0	0	0	0	0	0	0	0	0	0
Otu1343	Unclassified Bacteria	0	0	0	0	0	0	0	0	0	0	0	0	0	0	0	0	3.87567e-05	0	0	0	0	0	0	0	0	0	0	0	0	0	0	0	0	0	0	0	0	0	0	0	0	0	0	0	0	0	0	0
Otu1344	Unclassified Betaproteobacteria	0	0	0	0	0	0	0	0	0	0	0	0	0	0	0	0	0	0	0	0	0	0	0	0	0	0	0	0	0.000113295	0	0	0	0	0	0	0	0	0	0	0	0	0	0	0	0	0	0	0
Otu1345	Unclassified Lachnospiraceae	0	0	0	0	0	0	0	0	0	0	0	0	0	0	0	0	0	0	0	0	0	0	0	0	0	0	0	0	0	0	3.92989e-05	0	0	0	0	0	0	0	0	0	0	0	0	0	0	0	0	0
Otu1346	Arcobacter	0	0	0	0	0	0	0	0	0	0	0	0	0	0	0	0	0	3.22695e-05	0	0	0	0	0	0	0	0	0	0	0	0	0	0	0	0	0	0	0	0	0	0	0	0	0	0	0	0	0	0
Otu1347	Unclassified Lachnospiraceae	0	0	0	0	0	0	0	0	0	0	0	0	0	0	0	0	0	0	0	0	0	0	0	0	0	0	0	0	0	0	0	0	0	0	0	0	0	0	0	4.0085e-05	0	0	0	0	0	0	0	0
Otu1348	Unclassified Bacteria	0	0	0	0	0	0	0	0	0	0	0	0	0	0	0	0	0	0	0	0	0	0	0	0	0	0	0	0	0	0	0	0	0	0	0	0	0	0	0	4.0085e-05	0	0	0	0	0	0	0	0
Otu1349	Unclassified Bradyrhizobiaceae	0	0	0	0	0	0	0	0	0	0	0	0	0	0	0	0	3.87567e-05	0	0	0	0	0	0	0	0	0	0	0	0	0	0	0	0	0	0	0	0	0	0	0	0	0	0	0	0	0	0	0
Otu1350	Unclassified Bacteria	0	0	0	0	0	0	0	0	0	0	0	0	0	0	0	0	0	0	0	0	0	0	0	0	0	0	0	0	0	0	0.000235793	0	0	0	0	0	0	0	0	0	0	0	0	0	0	0	0	0
Otu1351	Unclassified Firmicutes	0	0	0	0	0	0	0	0	0	0	0	0	0	0	0	0	0	3.22695e-05	0	0	0	0	0	0	0	0	0	0	0	0	0	0	0	0	0	0	0	0	0	0	0	0	0	0	0	0	0	0
Otu1352	Unclassified Bacteria	0	0	0	0	0	0	0	0	0	0	0	0	0	0	0	0	7.75134e-05	0	0	0	0	0	0	0	0	0	0	0	0	0	0.000235793	0.00082757	0	0	0	0	0	0	0	0	0	0	0	0	0	0	0	0
Otu1353	Gp6	0	0	0	0	0	0	0	0	0	0	0	0	0	0	0	0	0	6.4539e-05	0	0	0	0	0	0	0	0	0	0	0	0	0	0	0	0	0	0	0	0	0	0	0	0	0	0	0	0	0	0
Otu1354	Unclassified Bacteria	0	5.97729e-05	0	0	0	0	0	0	0.00028463	0	0	0	0	0	0	9.28031e-05	0	0	0	0	0	0	0	0	0	0	0	0	0.000113295	0	0	0	0	0	0	0	0	0	0	0	0	0	0	0	0	0	0	0
Otu1355	Unclassified Bacteria	0	0	0	0	0	0	0	0	0	0	0	0	0	0	0	0	0	0	0	0	0	0	0	0	0	0	0	0	0	0	7.85978e-05	0	0	0	0	0	0	0	0	0	0	0	0	0	0	0	0	0
Otu1356	Unclassified Sphingomonadaceae	0	0	0	0	0	0	0	0	0	0	0	0	0	0	0	0	0	0	0	0	0	0	0	0	0	0	0	0	2.83238e-05	0	0	0	0	0	0	0	0	0	0	0	0	0	0	0	0	0	0	0
Otu1357	Unclassified Bacteria	0	0	0	0	0	0	0	0	0	0	0	0	0	0	0	0	0	0	0	0	0	0	0	0	0	0	0	0	0.00082139	0	0	0	0	0	0	0	0	0	0	0	0	0	0	0	0	0	0	0
Otu1358	Phascolarctobacterium	0	0	0	0	0	0	0	0	0	0	0	0	0	0	0	0	0	3.22695e-05	2.79979e-05	0	0	0	0	0	0	0	0	0	0	0	0	0	0	0	0	0	0	0	0	0	0	0	0	0	0	0	0	0
Otu1359	Unclassified Parachlamydiaceae	0	0	0	0	0	0	0	0	0	0	0	0	0	0	0	0	3.87567e-05	0	0	0	0	0	0	0	0	0	0	0	0	0	0	0	0	0	0	0	0	0	0	0	0	0	4.35398e-05	0	0	0	0	0
Otu1360	Unclassified Bacteria	0	0	0	0	0	0	0	0	0	0	0	0	0	0	0	0	0	0	0	0	0	0	0	0	0	0	0	0	0	0	0	0	0	0	0	0	0	6.2692e-05	0	0	0	0	0	0	0	0	0	0
Otu1361	Prosthecobacter	0	0	0	0	0	0	0	0	0	0	0	0	0	0	0	0	0	0	0	0	0	0	8.04311e-05	0	0	0	0	0	0	0	0	0	0	0	0	0	0	0	0	0	0	0	0	0	0	0	0	0
Otu1362	Unclassified Alphaproteobacteria	0	0	0	0	0	0	0	0	0	0	0	0	0	0	0	0	0	0	0	0	0	0	4.02156e-05	0	0	0	0	0	0	0	0	0	0	0	0	0	0	0	0	0	0	0	0	0	0	0	0	0
Otu1363	OD1_genus_incertae_sedis	0	0	0	0	0	0	0	0	0	3.26232e-05	0	0	0	0	0	0	0	0	0	0	0	0	0	0	0	0	0	0	0	0	0	0	0	0	0	0	0	0	0	0	0	0	0	0	0	0	0	0
Otu1364	Unclassified Planctomycetaceae	0	0	0	0	0	0	0	0	0	0	0	0	0	0	0	0	0	0	0	0	0	0	0	0	0	0	0	0	2.83238e-05	0	0	0	0	0	0	0	0	0	0	0	0	0	0	0	0	0	0	0
Otu1365	Unclassified Lachnospiraceae	0	0	0	0	0	0	0	0	0	0	0	0	0	0	0	0	0	0	0	0	0	0	0	0	0	0	0	0	0	0	0	0	0	0	0	0	0	3.1346e-05	0	0	0	0	0	0	0	0	0	0
Otu1366	Unclassified Bacteria	0	0	0	0	0	0	0	0	0	0	0	0	0	0	0	0	0	0	0	0	0	0	0	0	0	0	0	0	5.66476e-05	0	0	0	0	0	0	0	0	0	0	0	0	0	0	0	0	0	0	0
Otu1367	Unclassified Bacteria	0	0	0	0	0	0	0	0	0	0	0	0	0	0	0	0	0	0	0	0	0	0	0	0	0	0	0	0	2.83238e-05	0	0	0	0	0	0	0	0	0	0	0	0	0	0	0	0	0	0	0
Otu1368	Unclassified Bacteria	0	0	0	0	0	0	0	0	0	0	0	0	0	0	0	0	0	0	0	0	0	0	8.04311e-05	0	0	0	0	0	0	0	0	0	0	0	0	0	0	0	0	0	0	0	0	0	0	0	0	0
Otu1369	Unclassified Bradyrhizobiaceae	0	0	0	0	0	0	0	0	0	0	0	0	0	0	0	0	0	0	0	0	0	0	0	0	0	0	0	0	0	0	0	0	0	0	0	0	0	0.00015673	0	0	0	0	0	0	0	0	0	0
Otu1370	Unclassified Bacteroidetes	0	0	0	0	0	0	0	0	0	0	0	0	0	0	0	0	0	0	0	0	0	0	8.04311e-05	0	0	0	0	0	0	0	0	0	0	0	0	0	0	0	0	0	0	0	0	0	0	0	0	0
Otu1371	Novosphingobium	0	0	0	0	0	0	0	0	0	0	0	0	0	0	0	0	0	0	0	0	0	0	8.04311e-05	0	0	0	0	0	0	0	0	0	0	0	0	0	0	0	0	0	0	0	0	0	0	0	0	0
Otu1372	Unclassified Bradyrhizobiaceae	0	0	0	0	0	0	0	0	0	0	0	0	0	0	0	0	0	0	0	0	0	0	0	0	0	0	0	0	0	0	0	0	0	0	0	0	0	3.1346e-05	0	0	0	0	0	0	0	0	0	0
Otu1373	Unclassified Lachnospiraceae	0	0	0	0	0	0	0	0	0	3.26232e-05	0	0	0	0	0	0	0	0	0	0	0	0	0	0	0	0	0	0	0	0	0	0	0	0	0	0	0	0	0	0	0	0	0	0	0	0	0	0
Otu1374	Unclassified Alphaproteobacteria	0	0	0	0	0	0	0	0	0	0	0	0	0	0	0	0	0	0	0	0	0	0	0	0	0	0	0	0	2.83238e-05	0	0	0	0	0	0	0	0	0	0	0	0	0	0	0	0	0	0	0
Otu1375	Unclassified Planctomycetaceae	0	0	0	0	0	0	0	0	0	0	0	0	0	0	0	0	0	0	0	0	0	0	0	0	0	0	0	0	2.83238e-05	0	0	0	0	0	0	0	0	0	0	0	0	0	0	0	0	0	0	0
Otu1376	Unclassified Bacteria	0	0	0	0	0	0	0	0	0	0	0	0	0	0	0	0	0	0	0	0	0	0	0	0	0	0	0	0	2.83238e-05	0	0	0	0	0	0	0	0	0	0	0	0	0	0	0	0	0	0	0
Otu1377	Unclassified Verrucomicrobia	0	0	0	0	0	0	0	0	0	0	0	0	0	0	0	0	0	0	0	0	0	0	4.02156e-05	0	0	0	0	0	0	0	0	0	0	0	0	0	0	0	0	0	0	0	0	0	0	0	0	0
Otu1378	Pasteuria	0	0	0	0	0	0	0	0	0	0	0	2.93574e-05	0	0	0	0	0	0	0	0	0	0	0	0	0	0	0	0	0	0	0	0	0	0	0	0	0	0	0	0	0	0	0	0	0	0	0	0
Otu1379	Unclassified Sphingomonadaceae	0	0	0	0	0	0	0	0	0	0	0	5.87147e-05	0	0	0	0	0	0	0	0	0	0	0	0	0	0	0	0	0	0	0	0	0	0	0	0	0	0	0	0	0	0	0	0	0	0	0	0
Otu1380	Unclassified Proteobacteria	0	0	0	0	0	0	0	0	0	0	0	0	0	0	0	0	0	0	0	0	0	0	4.02156e-05	0	0	0	0	0	0	0	0	0	0	0	0	0	0	0	0	0	0	0	0	0	0	0	0	0
Otu1381	Unclassified Actinomycetales	0	0	0	0	0	0	0	0	0	0	0	0	0	0	0	0	0	0	0	0	0	0	4.02156e-05	0	0	0	0	0	0	0	0	0	0	0	0	0	0	0	0	0	0	0	0	0	0	0	0	0
Otu1382	Unclassified Bacteria	0	0	0	0	0	0	0	0	0	0	0	0	0	0.000129082	0	0	0	0	0	0	0	0	0	0	0	0	0	0	0	0	0	0	0	0	0	0	0	0	0	0	0	0	0	0	0	0	0	0
Otu1383	Unclassified Rhizobiales	0	0	0	0	0	0	0	0	0	0	0	5.87147e-05	0	0	0	0	0	0	0	0	0	0	0	0	0	0	0	0	0	0	0	0	0	0	0	8.53558e-05	0	0	0	0	0	0	0	0	0	0	0	0
Otu1384	Gp3	0	0	0	0	0	0	0	0	0	0	0	0	0	0	0	0	0	0	0	0	0	0	0	0	0	0	0	0	0	0	0	0	0	0	0	0	0	0	0	0	0	0	0	0	0	0	0	0
Otu1385	Gp1	0	0	0	0	0	0	0	0	0	0	0	0	0	0	0	0	0	0	0	0	0	0	0	0	0	0	0	0	0	0	0	0	0	0	0	0	0	0	0	0	0	0	0	0	0	0	0	0
Otu1386	Unclassified Myxococcales	0	0	0	0	0	0	0	0	0	0	0	0	0	0	0	0	0	0	0	0	0	0	0	0	0	0	0	0	0	0	0	0	0	0	0	0	0	0	0	0	0	0	0	0	0	0	0	0
Otu1387	Unclassified Bacteria	0	0	0	0	0	0	0	0	0	0.000130493	5.75341e-05	0	0	0	0	0	0	0	0	0	0	0	0	0	0	0	0	0	0	0	0	0	0	0	0	0	0	0	0	0	0	0	0	0	0	0	0	0
Otu1388	Unclassified Gammaproteobacteria	0	0	0	0	0	0	0	0	0	0	0	0	0	0	0	0	0	0	0	0	0	0	0	0	0	0	0	0	0	0	0	0	0	0	0	0	0	0	0	0	0	0	0	0	0	0	0	0
Otu1389	Unclassified Bacteria	0	0	0	0	0	0	0	0	0	0	0	0	0	0	0	0	7.75134e-05	0	0	0	0	0	0	0	0	0	0	0	0	0	0	0	0	0	0	0	0	0	0	0	0	0	0	0	0	0	0	0
Otu1390	Sphingopyxis	0	0	0	0	0	0	0	0	0	3.26232e-05	0	0	0	0	0	0	0	0	0	0	0	0	0	0	0	0	0	0	0	0	0	0	0	0	0	0	0	0	0	0	0	0	0	0	0	0	0	0
Otu1391	Opitutus	0	0	0	0	0	0	0	0	0	0	0	0	0	0	0	0	0	0	0	0	0	0	0	0	0	0	0	0	0	0	0	0	0	0	0	0	0	0	0	0	0	0	0	0	0	0	0	0
Otu1392	Fluviicola	0	0	0	0	0	0	0	0	0	3.26232e-05	0	0	0	0	0	0	0	0	0	0	0	0	0	0	0	0	0	0	0	0	0	0	0	0	0	0	0	0	0	0	0	0	0	0	0	0	0	0
Otu1393	Unclassified Bacteria	0	0	0	0	0	0	0	0	0	3.26232e-05	0	0	0	0	0	0	0	0	0	0	0	0	0	0	0	0	0	0	0	0	0	0	0	0	0	0	0	0	0	0	0	0	0	0	0	0	0	0
Otu1394	Unclassified Bacteria	0	0	0	0	0	0	0	0	0	0	0	0	0	0	0	0	0	0	0	0	0	0	0	0	0	0	0	0	0	0	7.85978e-05	0	0	0	0	0	0	0	0	0	0	0	0	0	0	0	0	0
Otu1395	Unclassified Desulfovibrionales	0	0	0	0	0	0	0	0	0	0	0	0	0	0	0	0	0	0	0	0	0	0	0	0	0	0	0	0	0	0	0	0	0	0	0	0	0	0	3.03582e-05	0	0	0	0	0	0	0	0	0
Otu1396	Unclassified Beijerinckiaceae	0	0	0	0	0	0	0	0	0	0	0	0	0	0	0	0	0	0	0	0	0	0	0	0	0	0	0	0	0	0	0	0	0	0	0	0	0	0	0	0	0	0	0	0	0	0	0	0
Otu1397	Unclassified Bacteria	0	0	0	0	0	0	0	0	0	0	0	0	0	0	0	0	0	0	0	0	0	0	0	0	0	0	0	0	0	0	3.92989e-05	0	0	0	0	0	0	0	0	0	0	0	0	0	0	0	0	0
Otu1398	Unclassified Bacteria	0	0	5.8931e-05	0	0	0	0	0	0	0	0	0	0	0	0	0	0	0	0	0	0	0	0	0	0	0	0	0	0	0	0.000550185	0	0	2.88517e-05	0	0	0	0	0	0	0	0	0	0	0	0	0	0
Otu1399	Unclassified Clostridiales	0	0	0	0	0	0	0	0	0	0	0	0	0	0	0	0	3.87567e-05	0	0	0	0	0	0	0	0	0	0	0	0	0	0	0	0	0	0	0	0	0	0	0	0	0	0	0	0	0	0	0
Otu1400	Blastomonas	0	0	0	0	0	0	0	0	0	0	0	8.80721e-05	0	0	0	0	0	0	0	0	0	0	0	0	0	0	0	0	0	0	0	0	0	0	0	0	0	0	0	0	0	0	0	0	0	0	0	0
Otu1401	Unclassified Bacteria	0	0	0	0	0	0	0	0	0	0	0	0	0	0	0	0	3.87567e-05	0	0	0	0	0	0	0	0	0	0	0	0	0	0	0	0	0	0	0	0	0	0	0	0	0	0	0	0	0	0	0
Otu1402	Unclassified Bacteria	0	0	0	0	0	0	0	0	0	0	0	0	0	0	0	0	0	0	0	0	0	0	4.02156e-05	0	0	0	0	0	0	0	0	0	0	0	0	0	0	0	0	0	0	0	0	0	0	0	0	0
Otu1403	Unclassified Alphaproteobacteria	0	0	0	0	0	0	0	0	0	0	0	0	0	0	0	0	0	0	0	0	0	0	0	0	0	0	0	0	2.83238e-05	0	0	0	0	0	0	0	0	0	0	0	0	0	0	0	0	0	0	0
Otu1404	Unclassified Bacteroidetes	0	0	0	0	0	0	0	0	0	0	0	8.80721e-05	0	0	0	0	0	0	0	0	0	0	0	0	0	0	0	0	0	0	0	0	0	0	0	0	0	0	0	0	0	0	0	0	0	0	0	0
Otu1405	Unclassified Rhodospirillales	0	0	0	0	0	0	0	0	0	0	0	0	0	0	0	0	0	0	0	0	0	0	8.04311e-05	0	0	0	0	0	0	0	0	0	0	0	0	0	0	0	0	0	0	0	0	0	0	0	0	0
Otu1406	Unclassified Sphingomonadaceae	0	0	0	0	0	0	0	0	0	0	0	0	0	0	0	0	0	0	0	0	0	0	4.02156e-05	0	0	0	0	0	0	0	0	0	0	0	0	0	0	0	0	0	0	0	0	0	0	0	0	0
Otu1407	Unclassified Lachnospiraceae	0	0	0	0	0	0	0	0	0	3.26232e-05	0	0	0	0	0	0	0	0	0	0	0	0	0	0	0	0	0	0	0	0	0	0	0	0	0	0	0	0	0	0	0	0	0	0	0	0	0	0
Otu1408	Planctomyces	0	0	0	0	0	0	0	0	0	3.26232e-05	0	0	0	0	0	0	0	0	0	0	0	0	0	0	0	0	0	0	0	0	0	0	0	0	0	0	0	0	0	0	0	0	0	0	0	0	0	0
Otu1409	Unclassified Bacteria	0	0	0	0	0	0	0	0	0	0	0	0	0	0	0	0	0	0	0	0	0	0	4.02156e-05	0	0	0	0	0	0	0	0	0	0	0	0	0	0	0	0	0	1.93211e-05	0	0	0	0	0	0	0
Otu1410	Unclassified Betaproteobacteria	0	0	0	0	0	0	0	0	0	0	0	0	0	0	0	0	0	0	0	0	0	0	0	0	0	0	0	0	0	0	0	0	0	0	0	0	0	9.4038e-05	0	0	0	0	0	0	0	0	0	0
Otu1411	Unclassified Bradyrhizobiaceae	0	0	0	0	0	0	0	0	0	0	0	0	0	0	0	0	0	0	0	0	0	0	4.02156e-05	0	0	0	0	0	0	0	0	0	0	0	0	0	0	0	0	0	0	0	0	0	0	0	0	0
Otu1412	Unclassified Bacteria	0	0	0	0	0	0	0	0	0	3.26232e-05	0	0	0	0	0	0	0	0	0	0	0	0	0	0	0	0	0	0	0	0	0	0	0	0	0	0	0	0	0	0	0	0	0	0	0	0	0	0
Otu1413	Unclassified Bacteria	0	0	0	0	0	0	0	0	0	0	0	0	0	0	0	0	0	0	0	0	0	0	0	0	2.91715e-05	0	0	0	0	0	0	0	0	0	0	0	0	0	0	0	0	0	0	0	0	0	0	0
Otu1414	Unclassified Gammaproteobacteria	0	0	0	0	0	0	0	0	0	0	0	0	0	0	0	0	0	0	0	0	0	0	0	0	0	0	0	0	0	0	0	0	0	0	0	0	0	6.2692e-05	0	0	0	0	0	0	0	0	0	0
Otu1415	Unclassified Lachnospiraceae	0	0	0	0	0	0	0	0	0	0	0	0	0	0	0	0	0	0	0	0	0	0	4.02156e-05	0	0	0	0	0	0	0	0	0	0	0	0	0	0	0	0	0	0	0	0	0	0	0	0	0
Otu1416	Zavarzinella	0	0	0	0	0	0	0	0	0	0	0	2.93574e-05	0	0	0	0	0	0	0	0	0	0	0	0	0	0	0	0	0	0	0	0	0	0	0	0	0	0	0	0	0	0	0	0	0	0	0	0
Otu1417	Pseudomonas	0	0	0	0	0	0	0	0	0	0	0	0	0	0	0	0	0	0	0	0	0	0	0	0	0	0	0	0	2.83238e-05	0	0	0	0	0	0	0	0	0	0	0	0	0	0	0	0	0	0	0
Otu1418	Unclassified Betaproteobacteria	0	0	0	0	0	0	0	0	0	0	0	5.87147e-05	0	0	0	0	0	0	0	0	0	0	0	0	0	0	0	0	0	0	0	0	0	0	0	0	0	0	0	0	0	0	0	0	0	0	0	0
Otu1419	Unclassified Bacteria	0	0	0	0	0	0	0	0	0	3.26232e-05	0	0	0	0	0	0	0	0	0	0	0	0	0	0	0	0	0	0	0	0	0	0	0	0	0	0	0	0	0	0	0	0	0	0	0	0	0	0
Otu1420	Unclassified Chitinophagaceae	0	0	0	0	0	0	0	0	4.74383e-05	0	0	0	0	0	0	0	0	0	0	0	0	0	0	0	0	0	0	0	0	0	0	0	0	0	0	0	0	0	0	0	0	0	0	0	0	0	0	0
Otu1421	Unclassified Bacteria	0	0	5.8931e-05	0	0	0	0	0	0	0	2.8767e-05	0	0	0	0	0	7.75134e-05	0	0	0	0	0	0	0	0	0	0	0	0	0	0	0	0	0	0	0	0	0	0	0	0	0	0	0	0	0	0	0
Otu1422	Unclassified Betaproteobacteria	0	0	0	0	0	0	0	0	0	0	0	0	0	0	0	0	0	0	0	2.56154e-05	0	0	0	0	0	0	0	0	0	0	0	0	0	0	0	0	0	0	0	0	0	0	0	0	0	0	0	0
Otu1423	Unclassified Bacteria	0	0	0	0	0	0	0	0	0	0	8.63011e-05	0	0	0	0	0	0	0	0	0	0	0	0	0	0	0	0	0	0	0	0	0	0	0	0	0	0	0	0	0	0	0	0	0	0	0	0	0
Otu1424	Unclassified Bacteria	0	0	0	0	0	0	0	0	0	0	0	0	0	0	0	0	0	0	0	0	0	0	0	0	0	0	0	2.83567e-05	0	0	0	0	0	0	0	0	0	0	0	0	0	0	0	0	0	0	0	0
Otu1425	Unclassified Bacteria	0	0	0	0	0	0	0	0	0	0	0	0	0	0	0	0	0	0	0	0	0	0	0	0	0	0	0	2.83567e-05	0	0	0	0	0	0	0	0	0	0	0	0	0	0	0	0	0	0	0	0
Otu1426	Unclassified Porphyromonadaceae	0	0	0	0	0	0	0	0	0	0	0	0	0	0	0	0	0	0	0	0	0	0	0	0	0	0	2.9391e-05	0	0	0	0	0	0	0	0	0	0	0	0	0	0	0	0	0	0	0	0	0
Otu1427	Unclassified Bacteria	0	0	0	0	0.000112284	0	0	0	0	0	0	0	0	0	0	0	0	0	0	0	0	0	0	0	0	0	0	0	0	0	0	0	0	0	0	0	0	0	0	0	0	0	0	0	0	0	0	0
Otu1428	Unclassified Sphingomonadaceae	0	0	0	0	0	0	0	0	0	0	0	0	0	0	0	9.28031e-05	0	0	0	0	0	0	0	0	0	0	0	0	0	0	0	0	0	0	0	0	0	0	0	0	0	0	0	0	0	0	0	0
Otu1429	Unclassified Rhodobacteraceae	0	0	0	6.61638e-05	0	0	0	0	0	0	0	0	0	0	0	0	0	0	0	0	0	0	0	0	0	0	0	0	0	0	0	0	0	0	0	0	0	0	0	0	0	0	0	0	0	0	0	0
Otu1430	Unclassified Sphingomonadaceae	0	0	0	0	0	0	0	0	0	0	0	0	0	0	0	0	0	0	0	2.56154e-05	0	0	0	0	0	0	0	0	0	0	0	0	0	0	0	0	0	0	0	0	0	0	0	0	0	0	0	0
Otu1431	Unclassified Burkholderiales	0	0	0	0	0	0	0	0	0	0	0	0	0	0	0	4.64016e-05	0	0	0	0	0	0	0	0	0	0	0	0	0	0	0	0	0	0	0	0	0	0	0	0	0	0	0	0	0	0	0	0
Otu1432	Unclassified Burkholderiales	0	0	0	0	0	0	0	0	4.74383e-05	0	0	0	0	0	0	0	0	0	0	0	0	0	0	0	0	0	0	0	0	0	0	0	0	0	0	0	0	0	0	0	0	0	0	0	0	0	0	0
Otu1433	Unclassified Bacteria	0	0	0	6.61638e-05	0	0	0	0	0	0	0	0	0	0	0	0	0	0	0	0	0	0	0	0	0	0	0	0	0	0	0	0	0	0	0	0	0	0	0	0	0	0	0	0	0	0	0	0
Otu1434	Unclassified Bacteria	0	0	0	0	0	0	0	0	9.48767e-05	0	0	0	0	0	0	0	0	0	0	0	0	0	0	0	0	0	0	0	0	0	0	0	0	0	0	0	0	0	0	0	0	0	0	0	0	0	0	0
Otu1435	TM7_genus_incertae_sedis	0	0	0	0	0	0	0	0	0	0	0	0	0	0	0	4.64016e-05	0	0	0	0	0	0	0	0	0	0	0	0	0	0	0	0	0	0	0	0	0	0	0	0	0	0	0	0	0	0	0	0
Otu1436	Unclassified Actinomycetales	0	0	0	0	0	0	0	0	0	0	0	0	0	0	0	0	0	0	0	0	0	0	0	0	0	0	0	0	0	0	0	5.91121e-05	0	0	0	0	0	0	0	0	0	0	0	0	0	0	0	0
Otu1437	Unclassified Bacteria	0	0	0	0	0	0	0	0	4.74383e-05	0	0	0	0	0	0	0	0	0	0	0	0	0	0	0	0	0	0	0	0	0	0	0	0	0	0	0	0	0	0	0	0	0	0	0	0	0	0	0
Otu1438	Unclassified Bacteria	0	0	0	6.61638e-05	0	0	0	0	0	0	0	0	0	0	0	0	0	0	0	0	0	0	0	0	0	0	0	0	0	0	0	0	0	0	0	0	0	0	0	0	0	0	0	0	0	0	0	0
Otu1439	Acholeplasma	0	0	0	0	0	0	0	0	0.000142315	0	0	0	0	0	0	0	0	0	0	0	0	0	0	0	0	0	0	0	0	0	0	0	0	0	0	0	0	0	0	0	0	0	0	0	0	0	0	0
Otu1440	Unclassified Betaproteobacteria	0	0	0	0	0	0	0	0	0	0	0	0	0	0	0	4.64016e-05	0	0	0	0	0	0	0	0	0	0	0	0	0	0	0	0	0	0	0	0	0	0	0	0	0	0	0	0	0	0	0	0
Otu1441	Unclassified Chlamydiales	0	0	0	0	0	0	0	0	0.000142315	0	0	0	0	0	0	0	0	0	0	0	0	0	0	0	0	0	0	0	0	0	0	0	0	0	0	0	0	0	0	0	0	0	0	0	0	0	0	0
Otu1442	Unclassified Bacteria	0	0	0	6.61638e-05	0	0	0	0	0	0	0	0	0	0	0	0	0	0	0	0	0	0	0	0	0	0	0	0	0	0	0	0	0	0	0	0	0	0	0	0	0	0	0	0	0	0	0	0
Otu1443	Parachlamydia	0	0	0	0.000198491	0	0	0	0	0	0	0	0	0	0	0	0	0	0	0	0	0	0	0	0	0	0	0	0	0	0	0	0	0	0	0	0	0	0	0	0	0	0	0	0	0	0	0	0
Otu1444	Elizabethkingia	0	0	0	0	0	0	0	0	9.48767e-05	0	0	0	0	0	0	0	0	0	0	0	0	0	0	0	0	0	0	0	0	0	0	0	0	0	0	0	0	0	0	0	0	0	0	0	0	0	0	0
Otu1445	Unclassified Deltaproteobacteria	0	5.97729e-05	0	0	0	0	0	0	0.000237192	0	0	0	0	0	0	0	0	0	0	0	0	0	0	0	0	0	0	0	0	0	0	0	0	0	0	0	0	0	0	0	0	0	0	0	0	0	0	0
Otu1446	Fangia	0	0	0	0	0	0	0	0	0	0	8.63011e-05	0	0	0	0	0	0	0	0	0	0	0	0	0	0	0	0	0	0	0	0	0	0	0	0	0	0	0	0	0	0	0	0	0	0	0	0	0
Otu1447	Unclassified Bacteroidetes	0	0	0	0	0	0	0	0	0	0	0	0	0	0	0	0	0	0	0	0	0	0	0	0	0	0	0	0	0	0	0	0	0	0	0	0	0	0	0	0	0	0	0	0	0	0.000105511	0	0
Otu1448	Unclassified Bacteria	0	0	0	0	0	0	0	0	0	0	2.8767e-05	0	0	0	0	0	0	0	0	0	0	0	0	0	0	0	0	0	0	0	0	0	0	0	0	0	0	0	0	0	0	0	0	0	0	0	0	0
Otu1449	Unclassified Bacteria	0	0	0	0	0	0	0	0	9.48767e-05	0	0	0	0	0	0	0	0	0	0	0	0	0	0	0	0	0	0	0	0	0	0	0	0	0	0	0	0	0	0	0	0	0	0	0	0	0	0	0
Otu1450	Unclassified Gammaproteobacteria	0	0	0	0	0	0	0	0	9.48767e-05	0	0	0	0	0	0	0	0	0	0	0	0	0	0	0	0	0	0	0	0	0	0	0	0	0	0	0	0	0	0	0	0	0	0	0	0	0	0	0
Otu1451	Unclassified Bacteria	0	0	0	0	0	0	0	0	0	0	0	0	0	0	0	0	0	0	0	0	0	0	0	0	0	0	0	0	0	0	0	5.91121e-05	0	0	0	0	0	0	0	0	0	0	0	0	0	0	0	0
Otu1452	Unclassified Bacteria	0	0	0	0	0	0	0	0	0	0	0	0	0	0	0	0	0	0	0	0	0	0	0	7.95862e-05	0	0	0	0	0	0	0	0	0	0	0	0	0	0	0	0	0	0	0	0	0	0	0	0
Otu1453	Unclassified Microbacteriaceae	0	0	0	0	0	0	0	0	0	0	0	0	0	0	0	0	0	0	0	0	0	0	0	3.97931e-05	0	0	0	0	0	0	0	0	0	0	0	0	0	0	0	0	0	0	0	0	0	0	0	0
Otu1454	Unclassified Bacteria	0	0	0	0	0	0	0	0	0	0	0	0	0	0	0	0	0	0	0	0	0	0	0	0	0	0	0	2.83567e-05	0	0	0	0	0	0	0	0	0	0	0	0	0	0	0	0	0	0	0	0
Otu1455	Unclassified Alteromonadaceae	0	0	0	0	0	0	0	0	0	0	0	0	0	0	0	0	0	0	2.79979e-05	0	0	0	0	0	0	0	0	0	0	0	0	0	0	0	0	0	0	0	0	0	0	0	0	0	0	0	0	0
Otu1456	Unclassified Bacteria	0	0	0	0	0.00112284	0	0	0	0	0	0	0	0	0	0	0	0	0	0	0	0	0	0	0	0	0	0	0	0	0	0	0	0	0	0	0	0	0	0	0	0	0	0	0	0	0	0	0
Otu1457	Unclassified Proteobacteria	0	0	0	0	0.00134741	0	0	0	0	0	0	0	0	0	0	0	0	0	0	0	0	0	0	0	0	0	0	0	0	0	0	0	0	0	0	0	0	0	0	0	0	0	0	0	0	0	0	0
Otu1458	Streptococcus	0	0	0	0	0	0	0	0	0	0	0	0	0	0	0	0	0	0	0	0	0	0	0	0	0	0	0	0	0	0	0	0	0	0	0	0	0	0	0	0	0	0	0	0	0	0	0	0
Otu1459	Unclassified Clostridiales	0	0	0	0	0	0	0	0	0	0	2.8767e-05	0	0	0	0	0	0	0	0	0	0	0	0	0	0	0	0	0	0	0	0	0	0	0	0	0	0	0	0	0	0	0	0	0	0	0	0	0
Otu1460	Unclassified unclassified	0	0	0	0	0	0	0	0	0	0	0	0	0	0	0	0	0	0	2.79979e-05	0	0	0	0	0	0	0	0	0	0	0	0	0	0	0	0	0	0	0	0	0	0	0	0	0	0	0	0	0
Otu1461	Unclassified Clostridiales	0	0	0	0	0.000224568	0	0	0	0	0	0	0	0	0	0	0	0	0	0	0	0	0	0	0	0	0	0	0	0	0	0	0	0	0	0	0	0	0	0	0	0	0	0	0	0	0	0	0
Otu1462	Enhydrobacter	0	0	0	0	0.00460364	0	0	0	0	0	0	0	0	0	0	0	0	0	0	0	0	0	0	0	0	0	0	0	0	0	0	0	0	0	0	0	0	0	0	0	0	0	0	0	0	0	0	0
Otu1463	Unclassified Firmicutes	0	0	0	0	0	0	0	0	0	0	2.8767e-05	0	0	0	0	0	0	0	0	0	0	0	0	0	0	0	0	0	0	0	0	0	0	0	0	0	0	0	0	0	0	0	0	0	0	0	0	0
Otu1464	Unclassified Bacteria	0	0	0	0	0	0	0	0	0	0	0	0	0	0	0	0	0	0	2.79979e-05	0	0	0	0	0	0	0	0	0	0	0	0	0	0	0	0	0	0	0	0	0	0	0	0	0	0	0	0	0
Otu1465	Unclassified Betaproteobacteria	0	0	0	0	0	0	0	0	4.74383e-05	0	0	0	0	0	0	0	0	0	0	0	0	0	0	0	0	0	0	0	0	0	0	0	0	0	0	0	0	0	0	0	0	0	0	0	0	0	0	0
Otu1466	Unclassified Alphaproteobacteria	0	0	0	0	0	0	0	0	4.74383e-05	0	0	0	0	0	0	0	0	0	0	0	0	0	0	0	0	0	0	0	0	0	0	0	0	0	0	0	0	0	0	0	0	0	0	0	0	0	0	0
Otu1467	Unclassified Gammaproteobacteria	0	0	0	0	0	0	0	0	4.74383e-05	0	0	0	0	0	0	0	0	0	0	0	0	0	0	0	0	0	0	0	0	0	0	0	0	0	0	0	0	0	0	0	0	0	0	0	0	0	0	0
Otu1468	Ornithinimicrobium	0	0	0	0	0	0	0	0	4.74383e-05	0	0	0	0	0	0	0	0	0	0	0	0	0	0	0	0	0	0	0	0	0	0	0	0	0	0	0	0	0	0	0	0	0	0	0	0	0	0	0
Otu1469	Unclassified Bacteroidales	0	0	0	0	0	0	0	0	0	0	0	0	0	0	0	0	0	0	2.79979e-05	0	0	0	0	0	0	0	0	0	0	0	0	0	0	0	0	0	0	0	0	0	0	0	0	0	0	0	0	0
Otu1470	Unclassified Bacteria	0	0	0	0	0	0	0	0	0	0	0	0	0	0	0	0	0	0	0	0	0	0	0	0	0	0	0	5.67135e-05	0	0	0	0	0	0	0	0	0	0	0	0	0	0	0	0	0	0	0	0
Otu1471	Unclassified Flavobacteriaceae	0	0	0	0	0.00123512	0	0	0	0	0	0	0	0	0	0	0	0	0	0	0	0	0	0	0	0	0	0	0	0	0	0	0	0	0	0	0	0	0	0	0	0	0	0	0	0	0	0	0
Otu1472	Blastococcus	0	0	0	0	0.000112284	0	0	0	0	0	0	0	0	0	0	0	0	0	0	0	0	0	0	0	0	0	0	0	0	0	0	0	0	0	0	0	0	0	0	0	0	0	0	0	0	0	0	0
Otu1473	Unclassified Alphaproteobacteria	0	0	0	0	0	0	0	0	0	0	0	0	0	0	0	0	0	0	0	0	0	0	0	0	0	0	0	5.67135e-05	0	0	0	0	0	0	0	0	0	0	0	0	0	0	0	0	0	0	0	0
Otu1474	Unclassified Bacteria	0	0	0	0	0	0	0	0	0	0	0	0	0	0	0	0	0	0	0	0	0	0	0	0	0	0	0	5.67135e-05	0	0	0	0	0	0	0	0	0	0	0	0	0	0	2.17699e-05	0	0	0	0	0
Otu1475	TM7_genus_incertae_sedis	0	0	0	0	0.000224568	0	0	0	0	0	0	0	0	0	0	0	0	0	0	0	0	0	0	0	0	0	0	0	0	0	0	0	0	0	0	0	0	0	0	0	0	0	0	0	0	0	0	0
Otu1476	Barnesiella	0	0	0	0	0	0	0	0	0	0	0	0	0	0	0	0	0	0	2.79979e-05	0	0	0	0	0	0	0	0	0	0	0	0	0	0	0	0	0	0	0	0	0	0	0	0	0	0	0	0	0
Otu1477	Arcobacter	0	0	0	0	0.000112284	0	0	0	0	0	0	0	0	0	0	0	0	0	0	0	0	0	0	0	0	0	0	0	0	0	0	0	0	0	0	0	0	0	0	0	0	0	0	0	0	0	0	0
Otu1478	Dyadobacter	0	0	0	0	0.000224568	0	0	0	0	0	0	0	0	0	0	0	0	0	0	0	0	0	0	0	0	0	0	0	0	0	0	0	0	0	0	0	0	0	0	0	0	0	0	0	0	0	0	0
Otu1479	Unclassified Rhizobiales	0	0	0	0	0	0	0	0	0	0	0	0	0	0	0	0	0	0	0	7.68462e-05	0	0	0	0	0	0	0	0	0	0	0	0	0	0	0	0	0	0	0	0	0	0	0	0	0	0	0	0
Otu1480	Bdellovibrio	0	0	0	0	0.000561419	0	0	0	0	0	0	0	0	0	0	0	0	0	0	0	0	0	0	0	0	0	0	0	0	0	0	0	0	0	0	0	0	0	0	0	0	0	0	0	0	0	0	0
Otu1481	Unclassified Bacteroidetes	0	0	0	0	0	0	0	0	9.48767e-05	0	0	0	0	0	0	0	0	0	0	0	0	0	0	0	0	0	0	0	0	0	0	0	0	0	0	0	0	0	0	0	0	0	0	0	0	0	0	0
Otu1482	Unclassified Bacteria	0	0	0	0	0	0	0	0	0	0	0	0	0	0	0	4.64016e-05	0	0	0	0	0	0	0	0	0	0	0	0	0	0	0	0	0	0	0	0	0	0	0	0	0	0	0	0	0	0	0	0
Otu1483	Unclassified Alphaproteobacteria	0	0	0	0	0	0	0	0	0	0	0	0	6.054e-05	0	0	0	0	0	0	0	0	0	0	0	0	0	0	0	0	0	0	0	0	0	0	0	0	0	0	0	0	0	0	0	0	0	0	0
Otu1484	Unclassified Bacteria	0	0	0	6.61638e-05	0	0	0	0	0	0	0	0	0	0	0	0	0	0	0	0	0	0	0	0	0	0	0	0	0	0	0	0	0	0	0	0	0	0	0	0	0	0	0	0	0	0	0	0
Otu1485	Unclassified Gammaproteobacteria	0	0	0	0.000330819	0	0	0	0	9.48767e-05	0	0	0	0	0	0	0	0	0	0	0	0	0	0	0	0	0	0	0	0	0	0	0	0	0	0	0	0	0	0	0	0	0	0	0	0	0	0	0
Otu1486	Unclassified Flavobacteriales	0	0	0	0	0	0	0	0	0	0	0	0	0	0	0	4.64016e-05	0	0	0	0	0	0	0	0	0	0	0	0	0	0	0	0	0	0	0	0	0	0	0	0	0	0	0	0	0	0	0	0
Otu1487	Unclassified unclassified	0	0	5.8931e-05	0	0	0	0	0	0	0	0	0	0	0	0	0	0	0	0	0	0	0	0	0	0	0	0	0	0	0	0	0	0	0	0	0	0	0	0	0	0	0	0	0	0	0	0	0
Otu1488	Unclassified Proteobacteria	0	0	0	0	0	0	0	0	0	0	0	0	0	0	0	0	0	0	0	0	0	0	0	0	0	0	2.9391e-05	0	0	0	0	0	0	0	0	0	0	0	0	0	0	0	0	0	0	0	0	0
Otu1489	Unclassified Bacteria	0	0	5.8931e-05	0	0	0	0	0	0	0	0	0	0	0	0	0	0	0	0	0	0	0	0	0	0	0	0	0	0	0	0	0	0	0	0	0	0	0	0	0	0	0	0	0	0	0	0	0
Otu1490	SR1_genus_incertae_sedis	0	0	0	0	0	0	0	0	4.74383e-05	0	0	0	0	0	0	0	0	0	0	0	0	0	0	0	0	0	0	0	0	0	0	0	0	0	0	0	0	0	0	0	0	0	0	0	0	0	0	0
Otu1491	Unclassified Firmicutes	0	0	0	0	0	0	0	0	4.74383e-05	0	0	0	0	0	0	0	0	0	0	0	0	0	0	0	0	0	0	0	0	0	0	0	0	0	0	0	0	0	0	0	0	0	0	0	0	0	0	0
Otu1492	Aeromonas	0	0.000537956	0	0.000463147	0.00112284	0	0	0	9.48767e-05	0	0	0	0	0	0	0	0	0	0	0	0	0	0	0	0	0	0	0	0	0	0	0	0	0	0	2.84519e-05	3.42466e-05	0	0	0	0	0	0	0	0	0	0	0
Otu1493	Bilophila	0	0	0	0	0	0	0	0	0	0	0	0	0	0	0	0	0	0	0	0	0	0	0	0	0	0	2.9391e-05	0	0	0	0	0	0	0	0	0	0	0	0	0	0	0	0	0	0	0	0	0
Otu1494	Opitutus	0	0	5.8931e-05	0	0	0	0	0	0	0	0	0	0	0	0	0	0	0	0	0	0	0	0	0	0	0	0	0	0	0	0	0	0	0	0	2.84519e-05	0	0	0	0	0	0	0	0	0	0	0	0
Otu1495	Prevotella	0	0	0	0	0	0	0	0	4.74383e-05	0	0	0	0	0	0	0	0	0	0	0	0	0	0	0	0	0	0	0	0	0	0	0	0	0	0	0	0	0	0	0	0	0	0	0	0	0	0	0
Otu1496	Unclassified Alphaproteobacteria	0	0	0.000117862	0	0	0	0	0	0	0	0	0	0	0	0	0	0	0	0	0	0	0	0	0	0	0	0	0	0	0	0	0	0	0	0	0	0	0	0	0	0	0	0	0	0	0	0	0
Otu1497	Unclassified Proteobacteria	0	0	5.8931e-05	0	0	0	0	0	0	0	0	0	0	0	0	0	0	0	0	0	0	0	0	0	0	0	0	0	0	0	0	0	0	0	0	0	0	0	0	0	0	0	0	0	0	0	0	0
Otu1498	Gp4	0	0	0	0	0	0	0	0	0	0	0	0	0.00033297	0	0	0	0	0	0	0	0	0	0	0	0	0	0	0	0	0	0	0	0	0	0	0	0	0	0	0	0	0	0	0	0	0	0	0
Otu1499	Unclassified Proteobacteria	0	0	0	0	0	0	0	0	0.000521822	0	0	0	0	0	0	0	0	0	0	0	0	0	0	0	0	0	0	0	0	0	0	0	0	0	0	0	0	0	0	0	0	0	0	0	0	0	0	0
Otu1500	Unclassified Clostridiales	0	0	0	0	0	0	0	0	0	0	0	0	0	0	0	0	0	0	0	0	0	0	0	0	0	0	0	0	0	0	0	0	0	0	0	0	0	0	0	0	0	0	0	0	0	3.51704e-05	0	0
Otu1501	Blastopirellula	0	0	5.8931e-05	0	0	0	0	0	0	0	0	0	0	0	0	0	0	0	0	0	0	0	0	0	0	0	0	0	0	0	0	0	0	0	0	0	0	0	0	0	0	0	0	0	0	0	0	0
Otu1502	Unclassified Bacteria	0	0	5.8931e-05	0	0	0	0	0	0	0	0	0	0	0	0	0	0	0	0	0	0	0	0	0	0	0	0	0	0	0	0	0	0	0	0	0	0	0	0	0	0	0	0	0	0	0	0	0
Otu1503	Unclassified Bacteria	0	0	0.000235724	0	0	0	0	0	0	0	0	0	0	0	0	0	0	0	0	0	0	0	0	0	0	0	0	0	0	0	0	0	0	0	0	0	0	0	0	0	0	0	0	0	0	0	0	0
Otu1504	Unclassified Bacteria	0	0	5.8931e-05	0	0	0	0	0	0	0	0	0	0	0	0	0	0	0	0	0	0	0	0	0	0	0	0	0	0	0	0	0	0	0	0	0	0	0	0	0	0	0	0	0	0	0	0	0
Otu1505	Fusobacterium	0	0	0	0	0	0	0	0	0.000474383	0	0	0	0	0	0	0	0	0	0	0	0	0	0	0	0	0	0	0	0	0	0	0	0	0	0	0	0	0	0	0	0	0	0	0	0	0	0	0
Otu1506	Singulisphaera	0	0	0	6.61638e-05	0	0	0	0	0	0	0.000201369	0	0	0	0	4.64016e-05	0	0	0	0	0	0	4.02156e-05	0	0	0	0	0	0	0	0	0	0	0	0	0	0	0	0	0	0	0	0	0	0	0	0	0
Otu1507	Unclassified Clostridiales	0	0	0	0	0	0	0	0	0	0	0	0	3.027e-05	0	0	0	0	0	0	0	0	0	0	0	0	0	0	0	0	0	0	0	0	0	0	0	0	0	0	0	0	0	0	0	0	0	0	0
Otu1508	Unclassified Proteobacteria	0	0	0	0	0	0	0	0	9.48767e-05	0	0	0	0	0	0	0	0	0	0	0	0	0	0	0	0	0	0	0	0	0	0	0	0	0	0	0	0	0	0	0	0	0	0	0	0	0	0	0
Otu1509	Unclassified Bacteria	0	0	5.8931e-05	0	0	0	0	0	0	0	0	0	0	0	0	0	0	0	0	0	0	0	0	0	0	0	0	0	0	0	0	0	0	0	0	0	0	0	0	0	0	0	0	0	0	0	0	0
Otu1510	Unclassified Bacteria	0	0	0	0	0	0	0	0	4.74383e-05	0	0	0	0	0	0	0	0	0	0	0	0	0	0	0	0	0	0	0	0	0	0	0	0	0	0	0	0	0	0	0	0	0	0	0	0	0	0	0
Otu1511	Unclassified Bacteria	0	0	0	0	0	0	0	0	0.000237192	0	0	0	0	0	0	0	0	0	0	0	0	0	0	0	0	0	0	0	0	0	0	0	0	0	0	0	0	0	0	0	0	0	0	0	0	0	0	0
Otu1512	Unclassified Bacteria	0	0	0.000176793	0	0	0	0	0	0	0	0	0	0	0	0	0	0	0	0	0	0	0	0	0	0	0	0	0	0	0	0	0	0	0	0	0	0	0	0	0	0	0	0	0	0	0	0	0
Otu1513	Unclassified unclassified	0	0	0	0.000132328	0	0	0	0	0	0	0	0	0	0	0	0	0	0	0	0	0	0	0	0	0	0	0	0	0	0	0	0	0	0	0	0	0	0	0	0	0	0	0	0	0	0	0	0
Otu1514	Unclassified Bacteroidales	0	0	0	6.61638e-05	0	0	0	0	0	0	0	0	0	0	0	0	0	0	0	0	0	0	0	0	0	0	0	0	0	0	0	0	0	0	0	0	0	0	0	0	0	0	0	0	0	0	0	0
Otu1515	Unclassified Proteobacteria	0	0	0	0	0	0	0	0	0	0	0	0	0	0	0	0	0	0	0	0	5.55833e-05	0	0	0	0	0	0.000235128	0	0	0	0	0	0	0	0	0	0	0	0	0	0	0	0	0	0	0	0	0
Otu1516	Unclassified Rhodobacteraceae	0	0	0	0	0	0	0	0	0	0	0	0	0	0	0	4.64016e-05	0	0	0	0	0	0	0	0	0	0	0	0	0	0	0	0	0	0	0	0	0	0	0	0	0	0	0	0	0	0	0	0
Otu1517	Unclassified Bacteria	0	0	0	0.000132328	0	0	0	0	0	0	0	0	0	0	0	0	0	0	0	0	0	0	0	0	0	0	0	0	0	0	0	0	0	0	0	0	0	0	0	0	0	0	0	0	0	0	0	0
Otu1518	Unclassified Porphyromonadaceae	0	0	0	0	0	0	0	0	4.74383e-05	0	0	0	0	0	0	0	0	0	0	0	0	0	0	0	0	0	0	0	0	0	0	0	0	0	0	0	0	0	0	0	0	0	0	0	0	0	0	0
Otu1519	Unclassified Bacteria	0	0	0	0	0	0	0	0	0	0	5.75341e-05	0	0	0	0	0	0	0	0	0	0	0	0	0	0	0	0	0	0	0	0	0	0	0	0	0	0	0	0	0	0	0	0	0	0	0	0	0
Otu1520	Unclassified Bacteria	0	0	5.8931e-05	0.000463147	0	0	0	0	0	0	0	0	0	0	0	0	0	0	0	0	0	0	0	0	0	0	0	0	0	0	0	0	0	0	0	0	0	0	0	0	0	0	0	0	0	0	0	0
Otu1521	Unclassified Bacteroidetes	0	0	0	0.000132328	0	0	0	0	0	0	0	0	0	0	0	0	0	0	0	0	0	0	0	0	0	0	0	0	0	0	0	0	0	0	0	0	0	0	0	0	0	0	0	0	0	0	0	0
Otu1522	Unclassified Gammaproteobacteria	0	0	0	0	0	0	0	0	0	0	0	0	0	0	0	0	0	0	0	0.000102462	0	0	0	0	0	0	0	0	0	0	0	0	0	0	0	0	0	0	0	0	0	0	0	0	0	0	0	0
Otu1523	Moryella	0	0	0	0	0	0	0	0	0	0	0	0	0	0	0	4.64016e-05	0	0	0	0	0	0	0	0	0	0	0	0	0	0	0	0	0	0	0	0	0	0	0	0	0	0	0	0	0	0	0	0
Otu1524	Unclassified Bacteria	0	0	5.8931e-05	0	0	0	0	0	9.48767e-05	0	0	0	0	0	0	0	0	0	0	0	0	0	0	0	0	0	0	0	0	0	0	0	0	0	0	0	0	0	0	0	0	0	0	0	0	0	0	0
Otu1525	Unclassified Gammaproteobacteria	0	0	0	0.000198491	0	0	0	0	0	0	0	0	0	0	0	0	0	0	0	0	0	0	0	0	0	0	0	0	0	0	0	0	0	0	0	0	0	0	0	0	0	0	0	0	0	0	0	0
Otu1526	Unclassified Flavobacteriaceae	0	0	0	0	0	0	0	0	0.000189753	0	0	0	0	0	0	0	0	0	0	0	0	0	0	0	0	0	0	0	0	0	0	0	0	0	0	0	0	0	0	0	0	0	0	0	0	0	0	0
Otu1527	Unclassified Cystobacteraceae	0	0	0	0.000264655	0	0	0	0	0	0	0	0	0	0	0	0	0	0	0	0	0	0	0	0	0	0	0	0	0	0	0	0	0	0	0	0	0	0	0	0	0	0	0	0	0	0	0	0
Otu1528	Unclassified Alphaproteobacteria	0	0	0	0	0	0	0	0	0	0	2.8767e-05	0	0	0	0	0	0	0	0	0	0	0	0	0	0	0	0	0	0	0	0	0	0	0	0	0	0	0	0	0	0	0	0	0	0	0	0	0
Otu1529	Unclassified Bacteria	0	0	0	0.000132328	0	0	0	0	0	0	0	0	0	0	0	0	0	0	0	0	0	0	0	0	0	0	0	0	0	0	0	0	0	0	0	0	0	0	0	0	0	0	0	0	0	0	0	0
Otu1530	Unclassified Bacteroidetes	0	0	0	0	0	0	0	0	9.48767e-05	0	0	0	0	0	0	0	0	0	0	0	0	0	0	0	0	0	0	0	0	0	0	0	0	0	0	0	0	0	0	0	0	0	0	0	0	0	0	0
Otu1531	Unclassified Bacteroidetes	0	0	0	0	0	0	0	0	0	0	0	0	6.054e-05	0	0	0	0	0	0	0	0	0	0	0	0	0	0	0	0	0	0	0	0	0	0	0	0	0	0	0	0	0	0	0	0	0	0	0
Otu1532	Unclassified Bacteria	0	0	0	0	0	0	0	0	0	0	0.000115068	0	0	0	0	0	0	0	0	0	0	0	0	0	0	0	0	0	0	0	0	0	0	0	0	0	0	0	0	0	0	0	0	0	0	0	0	0
Otu1533	Unclassified Bacteria	0	0	0	0	0	0	0	0	0	0	8.63011e-05	0	0	0	0	0	0	0	0	0	0	0	0	0	0	0	0	0	0	0	0	0	0	0	0	0	0	0	0	0	0	0	0	0	0	0	0	0
Otu1534	Unclassified Opitutae	0	0	0	0	0	0	0	0	0	0	0	0	0	0	0	0	0	0	0	0	0	0	0	0	0	0	0	0	0	0	0	0	0	0	0	0	0	0	0	0	0	0	0	0	0	3.51704e-05	0	0
Otu1535	Unclassified Bacteria	0	0	0	0	0	0	0	0	0	0	0	0	0	0	0	0	0	0	0	0	0	0	0	0	0	0	8.81731e-05	0	0	0	0	0	0	0	0	0	0	0	0	0	0	0	0	0	0	0	0	0
Otu1536	Unclassified Proteobacteria	0	0	0	0	0	0	0	0	0.000474383	0	0	0	0	0	0	0	0	0	0	0	0	0	0	0	0	0	0	0	0	0	0	0	0	0	0	0	0	0	0	0	0	0	0	0	0	0	0	0
Otu1537	Actinobaculum	0	0	0	0	0	0	0	0	0	0	0	0	0	0	0	0	0	0	0	0	0	0	0	0	0	0	0	0	0	0	0	0	0	0	0	0	0	0	0	0	0	0	0	0	0	3.51704e-05	0	0
Otu1538	Unclassified Bacteria	0	0	0	0	0	0	0	0	0	0	0	0	0	0	0	4.64016e-05	0	0	0	0	0	0	0	0	0	0	0	0	0	0	0	0	0	0	0	0	0	0	0	0	0	0	0	0	0	0	0	0
Otu1539	Unclassified Bacteria	0	0	0	6.61638e-05	0	0	0	0	0	0	0	0	0	0	0	0	0	0	0	0	0	0	0	0	0	0	0	0	0	0	0	0	0	0	0	0	0	0	0	0	0	0	0	0	0	0	0	0
Otu1540	Unclassified Sphingomonadaceae	0	0	0	0	0	0	0	0	0	0	0	0	0	0	0	0	0	0	0	2.56154e-05	0	0	0	0	0	0	0	0	0	0	0	0	0	0	0	0	0	0	0	0	0	0	0	0	0	0	0	0
Otu1541	Unclassified Alphaproteobacteria	0	0	0	6.61638e-05	0	0	0	0	0	0	0	0	0	0	0	0	0	0	0	0	0	0	0	0	0	0	0	0	0	0	0	0	0	0	0	0	0	0	0	0	0	0	0	0	0	0	0	0
Otu1542	Unclassified Clostridiales	0	0	0.000117862	6.61638e-05	0	0	0	0	0	0	0	0	0	0	0	0	0	0	0	0	0	0	0	0	0	0	0	0	0	0	0	0	0	0	0	0	0	0	0	0	0	0	0	0	0	0	0	0
Otu1543	Paludibacter	0	0	0	0	0	0	0	0	0	0	0	0	0	0	0	0	0	0	0	0	0	0	0	0	0	0	0	0	0	0	0	0	0	0	0	0	0	0	0	0	0	0	0	0	0	7.03408e-05	0	0
Otu1544	Unclassified Anaerolineaceae	0	0	0	0	0	0	0	0	0	0	0	0	0	0	0	0	0	0	0	0	0	0	0	0	0	0	0	8.50702e-05	0	0	3.92989e-05	0	0	0	0	0	0	0	0	0	0	0	0	0	0	0	0	0
Otu1545	Unclassified Betaproteobacteria	0	0	0	0	0	0	0	0	0	0	0	0	0	0	0	0	0	0	0	0	0	0	0	0	0	0	0	0	0	0	0	0	0	0	0	0	0	0	0	0	0	0	0	0	0	0	0	0
Otu1546	Unclassified Clostridiales	0	0	0	0	0	0	0	0	0	0	0	0	0	0	0	0	0	0	0	0	0	0	0	0	0	0	0	2.83567e-05	0	0	0	0	0	0	0	0	0	0	0	0	0	0	0	0	0	0	0	0
Otu1547	Unclassified Bacteria	0	0	0	0	0	0	0	0	0	0	0	0	0	0	0	0	0	0	0	0	0	0	0	3.97931e-05	0	0	0	0	0	0	0	0	0	0	0	0	0	0	0	0	0	0	0	0	0	0	0	0
Otu1548	Unclassified Sphingomonadaceae	0	0	0	0	0	0	0	0	0	0	0	0	0	0	0	0	0	0	0	0	0	0	0	3.97931e-05	0	0	0	0	0	0	0	0	0	0	0	0	0	0	0	0	0	0	0	0	0	0	0	0
Otu1549	Odoribacter	0	0	0	0	0	0	0	0	0	0	0	0	0	0	0	0	0	0	0	0	0	0	0	0	0	0	0	0	0	0	0	0	0	0	0	0	0	0	0	0	0	0	0	0	0	0	0	0
Otu1550	Unclassified Bacteria	0	0	0	0	0	0	0	0	0	0	2.8767e-05	0	0	0	0	0	0	0	0	0	0	0	0	0	0	0	0	0	0	0	0	0	0	0	0	0	0	0	0	0	0	0	0	0	0	0	0	0
Otu1551	Unclassified Deltaproteobacteria	0	0	0	0	0	0	0	0	0	0	0	0	0	0	0	0	0	0	0	0	0	0	0	0	0	0	0	5.67135e-05	0	0	0	0	0	0	0	0	0	0	0	0	0	0	0	0	0	0	0	0
Otu1552	Unclassified Alphaproteobacteria	0	0	0	0	0	0	0	0	0	0	0	0	0	0	0	0	0	0	0	0	0	0	0	0	0	0	0	0	0	0	0	0	0	0	0	0	0	6.2692e-05	0	0	0	0	0	0	0	0	0	0
Otu1553	Unclassified Firmicutes	0	0	0	0	0	0	0	0	0	0	0	0	0	0	0	0	0	0	0	0	0	0	0	0.000119379	0	0	0	0	0	0	0	0	0	0	0	0	0	0	0	0	0	0	0	0	0	0	0	0
Otu1554	Bosea	0	0	0	0	0	0	0	0	0	0	0	0	0	0	0	0	0	0	0	0	0	0	0	0	0	0	0	5.67135e-05	0	0	0	0	0	0	0	0	0	0	0	0	0	0	0	0	0	0	0	0
Otu1555	Unclassified Gammaproteobacteria	0	0	0	0	0	0	0	0	0	0	0	0	0	0	0	0	0	0	0	0	0	0	0	0	0	0	0	0	0	0	0	0	0	0	0	0	0	0	0	0	0	0	0	0	0	0	0	0
Otu1556	Unclassified unclassified	0	0	0	0	0	0	0	0	0	0	0	0	0	0	0	0	0	0	0	0	0	0	0	0	0	0	0	2.83567e-05	0	0	0	0	0	0	0	0	0	0	0	0	0	0	0	0	0	0	0	0
Otu1557	OD1_genus_incertae_sedis	0	0	0	0	0	0	0	0	0	0	0	0	0	0	0	0	0	0	0	0	0	0	0	0	0	0	0	0	0	0	0	0	0	0	0	0	0	0	0	0	0	0	0	0	0	0	0	0
Otu1558	Unclassified Betaproteobacteria	0	0	0	0	0	0	0	0	0	0	0	0	0	0	0	0	0	0	0	0	0	0	0	0	0	0	0	2.83567e-05	0	0	0	0	0	0	0	0	0	0	0	0	0	0	0	0	0	0	0	0
Otu1559	Legionella	0	0	0.000176793	0	0	0	0	0	0	0	0	0	0	0	0	0	0	0	0	0	0	0	0	0	0	0	0	0	0	0	0	0	0	0	0	0	0.00010274	0	0	0	0	0	0	0	0	0	0	0
Otu1560	Unclassified Bacteria	0	0	0	0	0	0	0	0	0	0	0	0	0	0	0	0	0	0	0	0	0	0	0	7.95862e-05	0	0	0	0	0	0	0	0	0	0	0	0	0	0	0	0	0	0	0	0	0	0	0	0
Otu1561	Unclassified Bacteria	0	0	0	0	0	0	0	0	0	0	0	0	0	0	0	0	0	0	0	0	0	0	0	0	0	0	0	0	0	0	0	0	0	0	0	0	0	0	0	0	0	0	0	0	0	0	0	0
Otu1562	Unclassified Bacteria	0	0	0	0	0	0	0	0	0	0	0	0	0	0	0	0	0	0	0	0	0	0	0	0	0	0	0	0	0	0	0	0	0	0	0	0	0	0	0	0	0	0	0	0	0	0	0	0
Otu1563	Unclassified Bacteria	0	0	0	0	0	0	0	0	0	0	0	0	0	0	0	0	0	0	0	0	0	0	0	3.97931e-05	0	0	0	0	0	0	0	0	0	0	0	0	0	0	0	0	0	0	0	0	0	0	0	0
Otu1564	Unclassified Planctomycetaceae	0	0	0	0	0	0	0	0	0	0	0	0	0	0	0	0	0	0	0	0	0	0	0	0	0	0	0	0	0	0	0	2.95561e-05	0	0	0	0	0	0	0	0	0	0	0	0	0	0	0	0
Otu1565	Desulfobacula	0	0	0	0	0	0	0	0	0	0	0	0	0	0	0	0	0	0	0	0	0	0	0	0	0	0	0	0	0	0	0	0.000118224	0	0	0	0	0	0	0	0	0	0	0	0	0	0	0	0
Otu1566	Prevotella	0	0	0	0	0	0	0	0	0	0	0	0	0	0	0	0	0	0	0	0	0	0	0	0	0	0	0	0	0	0	0	2.95561e-05	0	0	0	0	0	0	0	0	0	0	0	0	0	0	0	0
Otu1567	Unclassified Proteobacteria	0	0	0	0	0	0	0	0	0	0	0	0	0	0	0	0	0	0	2.79979e-05	0	0	0	0	0	0	0	0	0	0	0	0	0	0	0	0	0	0	0	0	0	0	0	0	0	0	0	0	0
Otu1568	Unclassified Lactobacillales	0	0	0	0	0	0	0	0	0	0	0	0	0	0	0	0	0	0	0	0	0	0	0	0	0	0	0	0	0	0	0	0	0	0	0	0	0	0	0	0	0	0	0	0	0	0	0	0
Otu1569	Limnobacter	0	0	0	0	0	0	0	0	0	0	0	0	0	0	0	0	0	0	0	0	0	0	0	7.95862e-05	0	0	0	0	0	0	0	0	0	0	0	0	0	0	0	0	0	0	0	0	0	0	0	0
Otu1570	Unclassified Bacteria	0	0	0	0	0	0	0	0	0	0	0	0	0	0	0	0	0	0	0	0	0	0	0	0	0	0	0	0	0	0	0	0	0	0	0	0	0	0	0	0	0	0	0	0	0	0	0	0
Otu1571	Unclassified Bacteria	0	0	0	0	0	0	0	0	0	0	0	0	0	0	0	0	0	0	0	0	0	0	0	7.95862e-05	0	0	0	0	0	0	0	0	0	0	0	0	0	0	0	0	0	0	0	0	0	0	0	0
Otu1572	Unclassified Sphingomonadaceae	0	0	0	0	0	0	0	0	0	0	2.8767e-05	0	0	0	0	0	0	0	0	0	0	0	0	0	0	0	0	0	0	0	0	0	0	0	0	0	0	0	0	0	0	0	0	0	0	0	0	0
Otu1573	Unclassified Neisseriaceae	0	0	0	0	0	0	0	0	0	0	0	0	0	0	0	0	0	0	0	0	0	0	0	0	0	0	0	0	0	0	0	0	0	0	0	0	0	0	0	0	0	0	0	0	0	0	0	0
Otu1574	Cellvibrio	0	0	0	0	0	0	0	0	0	0	0	0	0	0	0	0	0	0	0	0	0	0	0	0	0	0	0	8.50702e-05	0	0	0	0	0	0	0	0	0	0	0	0	0	0	0	0	0	0	0	0
Otu1575	Unclassified Bacteria	0	0	0	0	0	0	0	0	0	0	0	0	0	0	0	0	0	0	0	0	0	0	0	0	0	0	0	0.000680561	0	0	0	0	0	0	0	0	0	0	0	0	0	0	0	0	0	0	0	0
Otu1576	Unclassified Clostridiales	0	0	0	0	0	0	0	0	0	0	0	0	0	0	0	0	0	0	0	0	0	0	0	3.97931e-05	0	0	0	0	0	0	0	0	0	0	0	0	0	0	0	0	0	0	0	0	0	0	0	0
Otu1577	Unclassified Sphingomonadaceae	0	0	0	0	0	0	0	0	0	0	0	0	0	0	0	0	0	0	0	0	0	0	0	0	0	0	0	2.83567e-05	0	0	0	0	0	0	0	0	0	0	0	0	0	0	0	0	0	0	0	0
Otu1578	Bosea	0	0	0	0	0	0	0	0	0	0	0	0	0	0	0	0	0	0	0	0	0	0	0	0.000119379	0	0	0	0	0	0	0	0	0	0	0	0	0	0	0	0	0	0	0	0	0	0	0	0
Otu1579	Unclassified Proteobacteria	0	0	0	0	0	0	0	0	0	0	0	0	0	0	0	0	0	0	0	0	0	0	0	0	0	0	0	2.83567e-05	0	0	0	0	0	0	0	0	0	0	0	0	0	0	0	0	0	0	0	0
Otu1580	Unclassified Chitinophagaceae	0	0	0	0	0	0	0	0	0	0	0	0	0	0	0	0	0	0	0.000111991	0	0	0	0	0	0	0	0	0	0	0	0	0	0	0	0	0	0	0	0	0	0	0	0	0	0	0	0	0
Otu1581	Hydrotalea	0	0	0	0	0	0	0	0	0	0	0	0	0	0	0	0	0	0	0	0	0	0	0	7.95862e-05	0	0	0	0	0	0	0	0	0	0	0	0	0	0	0	0	0	0	0	0	0	0	0	0
Otu1582	Unclassified Sphingomonadaceae	0	0	0	0	0	0	0	0	0	0	0	0	0	0	0	0	0	0	0	2.56154e-05	0	0	0	0	0	0	0	0	0	0	0	0	0	0	0	0	0	0	0	0	0	0	0	0	0	0	0	0
Otu1583	Unclassified Proteobacteria	0	0	0	0	0	0	0	0	0	0	0	0	0	0	0	0	0	0	0	0	0	0	0	0	0	0	0	5.67135e-05	0	0	0	0	0	0	0	0	0	0	0	0	0	0	0	0	0	0	0	0
Otu1584	Unclassified Bacteria	0	0	0	0	0	0	0	0	0	0	0	0	0	0	0	0	0	0	0	0	0	0	0	0	0	0	0	0	0	0	0	0	0	0	0	0	0	0	0	0	0	0	0	0	0	0	0	0
Otu1585	Unclassified Actinomycetales	0	0	0	0	0	0	0	0	0	0	0	0	0	0	0	0	0	0	0	0	0	0	0	7.95862e-05	0	0	0	0	0	0	0	0	0	0	0	0	0	0	0	0	0	0	0	0	0	0	0	0
Otu1586	Unclassified Chlamydiales	0	0	0	0	0	0	0	0	0	0	0	0	0	0	0	0	0	0	0	0	0	0	0	0	0	0	0	8.50702e-05	0	0	0	0	0	0	0	0	0	0	0	0	0	0	0	0	0	0	0	0
Otu1587	Unclassified Gammaproteobacteria	0	0	0	0	0	0	0	0	0	0	0	0	0	0	0	0	0	0	0	0	0	0	0	0	0	0	0	0	0	0	0	0	0	0	0	0	0	0	0	0	0	0	0	0	0	0	0	0
Otu1588	Unclassified Betaproteobacteria	0	0	0	0	0	0	0	0	0	0	0	0	0	0	0	0	0	0	0	0	0	0	0	7.95862e-05	0	0	0	0	0	0	0	0	0	0	0	0	0	0	0	0	0	0	0	0	0	0	0	0
Otu1589	Unclassified Betaproteobacteria	0	0	0	0	0	0	0	0	0	0	0	0	0	0	0	0	0	0	2.79979e-05	0	0	0	0	0	0	0	0	0	0	0	0	0	0	0	0	0	0	0	0	0	0	0	0	0	0	0	0	0
Otu1590	Unclassified Bacteria	0	0	0	0	0	0	0	0	0	0	0	0	0	0	0	0	0	0	0	0	0	0	0	3.97931e-05	0	0	0	0	0	0	0	0	0	0	0	0	0	0	0	0	0	0	0	0	0	0	0	0
Otu1591	Legionella	0	0	0	0	0	0	0	0	0	0	0	0	0	0	0	0	0	0	0	0	0	0	0	0	0	0	0	0	0	0	0	0	0	0	0	0	0	0	0	0	0	0	0	0	0	0	0	0
Otu1592	Unclassified Enterobacteriaceae	0	0	0	0	0	0	0	0	0	0	0	0	0	0	0	0	0	0	0	0	0	0	0	0	0	0	0	0	0	0	0	0	0	0	0	0	0	0	0	0	0	0	0	0	0	0	0	0
Otu1593	Gp3	0	0	0	0.000132328	0	0	0	0	0	0	0	0	0	0	0	0	0	0	0	0	0	0	0	3.97931e-05	0	0	0	0	0	0	0	0	0	0	0	0	0	0	0	0	0	0	0	0	0	0	0	0
Otu1594	Unclassified Sphingomonadaceae	0	0	0	0	0	0	0	0	0	0	0	0	0	0	0	0	0	0	0	0	0	0	0	0	0	0	0	0	0	0	0	0	0	0	0	0	0	0	0	0	0	0	0	0	0	0	0	0
Otu1595	Acinetobacter	0	0	0	0	0	0	0	0	0	0	0	0	0	0	0	0	0	0	2.79979e-05	0	0	0	0	0	0	0	0	0	0	0	0	0	0	0	0	0	0	0	0	0	0	0	0	0	0	0	0	0
Otu1596	Unclassified Alphaproteobacteria	0	0	0	0	0	0	0	0	0	0	0	0	0	0	0	0	0	0	0	0	0	0	0	0	0	0	0	2.83567e-05	0	0	0	0	0	0	0	0	0	0	0	0	0	0	0	0	0	0	0	0
Otu1597	Malikia	0	0	0	0	0	0	0	0	0	0	0	0	0	0	0	0	0	0	0	0	0	0	0	0	0	0	0	0	0	0	0	0	0	0	0	0	0	0	0	0	0	0	0	0	0	0	0	0
Otu1598	Unclassified Bacteria	0	0	0	0	0	0	0	0	0	0	0	0	0	0	0	0	0	0	0.000167987	0	0	0	0	0	0	0	0	0	0	0	0	0	0	0	0	0	0	0	0	0	0	0	0	0	0	0	0	0
Otu1599	Unclassified Bacteria	0	0	0	0	0	0	0	0	0	0	0	0	0	0	0	0	0	0	0	0	0	0	0	0	0	0	0	0	0	0	0	0	0	0	0	0	0	0	0	0	0	0	0	0	0	0	0	0
Otu1600	Unclassified Betaproteobacteria	0	0	0	0	0	0	0	0	0	0	0	0	0	0	0	0	0	0	0	0	0	0	0	0	0	0	0	0	0	0	0	0	0	0	0	0	0	0	0	0	0	0	0	0	0	0	0	0
Otu1601	Unclassified Alphaproteobacteria	0	0	0	0	0	0	0	0	0	0	0	0	0	0	0	0	0	0	0	0	0	0	0	3.97931e-05	0	0	0	0	0	0	0	0	0	0	0	0	0	0	0	0	0	0	0	0	0	0	0	0
Otu1602	Unclassified Rhizobiales	0	0	0	0	0	0	0	0	0	0	0	0	0	0	0	0	0	0	0	0	0	0	0	3.97931e-05	0	0	0	0	0	0	0	0	0	0	0	0	0	0	0	0	0	0	0	0	0	0	0	0
Otu1603	Herminiimonas	0	0	0	0	0	0	0	0	0	0	0	0	0	0	0	0	0	0	0	0	0	0	0	0	0	0	0	0	2.83238e-05	0	0	0	0	0	0	0	0	0	0	0	0	0	0	0	0	0	0	0
Otu1604	Unclassified Veillonellaceae	0	0	0	0	0	0	0	0	0	0	0	0	0	0	0	0	0	0	0	0	0	0	0	3.97931e-05	0	0	0	0	0	0	0	2.95561e-05	0	0	0	0	0	0	0	0	0	0	0	0	0	0	0	0
Otu1605	Unclassified Gammaproteobacteria	0	0	0	0	0	0	0	0	0	0	0	0	0	0	0	0	0	0	0	0	0	0	0	0	0	0	0	0	0	0	0	0	0	0	0	0	0	0	0	0	0	0	0	0	0	0	0	0
Otu1606	Unclassified Chitinophagaceae	0	0	0	0	0	0	0	0	0	0	0	0	0	0	0	0	0	0	0	0	0	0	0	0	0	0	0	0	0	0	0	0	0	0	0	0	0	0	0	0	0	0	0	0	0	0	0	0
Otu1607	Unclassified Ruminococcaceae	0	0	0	0	0	0	0	0	0	0	0	0	0	0	0	0	0	0	2.79979e-05	0	0	0	0	0	0	0	0	0	0	0	0	0	0	0	0	0	0	0	0	0	0	0	0	0	0	0	0	0
Otu1608	Unclassified Aerococcaceae	0	0	0	0	0	0	0	0	0	0	0	0	0	0	0	0	0	0	0	0	0	0	0	0	0	0	0	0	0	0	0	2.95561e-05	0	0	0	0	0	0	0	0	0	0	0	0	0	0	0	0
Otu1609	Unclassified Bacteria	0	0	0	0	0	0	0	0	0	0	5.75341e-05	0	0	0	0	0	0	0	0	0	0	0	0	0	0	0	0	0	0	0	0	0	0	0	0	0	0	0	0	0	0	0	0	0	0	0	0	0
Otu1610	Unclassified Bacteria	0	0	0	0	0	0	0	0	0	0	0	0	0	0	0	0	0	0	0	2.56154e-05	0	0	0	0	0	0	0	0	0	0	0	0	0	0	0	0	0	0	0	0	0	0	0	0	0	0	0	0
Otu1611	Unclassified Alphaproteobacteria	0	0	0	0	0	0	0	0	0	0	0	0	0	0	0	0	0	0	0	0	0	0	0	0	0	0	0	0	0	0	0	8.86682e-05	0	0	0	0	0	0	0	0	0	0	0	0	0	0	0	0
Otu1612	Unclassified Betaproteobacteria	0	0	0	0	0	0	0	0	0	0	5.75341e-05	0	0	0	0	0	0	0	0	0	0	0	0	0	0	0	0	0	0	0	0	0	0	0	0	0	0	0	0	0	0	0	0	0	0	0	0	0
Otu1613	Unclassified Bacteria	0	0	0	0	0	0	0	0	0	0	0	0	0	0	0	0	0	0	0	0	0	0	0	0	0	0	0	0	0	0	0	2.95561e-05	0	0	0	0	0	0	0	0	0	0	0	0	0	0	0	0
Otu1614	Unclassified Firmicutes	0	0	0	0	0	0	0	0	0	0	0	0	0	0	0	0	0	0	0	0	0	0	0	0	0	0	0	0	0	0	0	0	0	0	0	0	0	0	0	0	0	0	0	0	0	0	0	0
Otu1615	Muricauda	0	0	0	0	0	0	0	0	0	0	0	0	0	0	0	0	0	0	0	0	0	0	0	0	0	0	0	0	0	0	0	5.91121e-05	0	0	0	0	0	0	0	0	0	0	0	0	0	0	0	0
Otu1616	Unclassified Erysipelotrichaceae	0	0	0	0	0	0	0	0	0	0	2.8767e-05	0	0	0	0	0	0	0	0	0	0	0	0	0	0	0	0	0	0	0	0	0	0	0	0	0	0	0	0	0	0	0	0	0	0	0	0	0
Otu1617	Unclassified Sphingobacteriales	0	0	0	0	0	0	0	0	0	0	0	0	0	0	0	0	0	0	0	0	0	0	0	0	0	0	0	5.67135e-05	0	0	0	0	0	0	0	0	0	0	0	0	0	0	0	0	0	0	0	0
Otu1618	Unclassified Bacteria	0	0	0	0	0	0	0	0	0	0	0	0	0	0	0	0	0	0	0	0	0	0	0	7.95862e-05	0	0	0	0	0	0	0	0	0	0	0	0	0	0	0	0	0	0	0	0	0	0	0	0
Otu1619	Phenylobacterium	0	0	0	0	0	0	0	0	0	0	0	0	0	0	0	0	0	0	0	0	0	0	0	0	0	0	0	0	0	0	0	0	0	0	0	0	0	0	0	0	0	0	0	0	0	0	0	0
Otu1620	Unclassified Erythrobacteraceae	0	0	0	0	0	0	0	0	0	0	0	0	0	0	0	0	0	0	0	0	0	0	0	0	0	0	0	0	0	0	0	0	0	0	0	0	0	0	0	0	0	0	0	0	0	0	0	0
Otu1621	Unclassified Rhizobiales	0	0	0	0	0	0	0	0	0	0	0	0	0	0	0	0	0	0	0	0	0	0	0	3.97931e-05	0	0	0	0	0	0	0	0	0	0	0	0	0	0	0	0	0	0	0	0	0	0	0	0
Otu1622	Unclassified Myxococcales	0	0	0	0	0	0	0	0	0	0	2.8767e-05	0	0	0	0	0	0	0	0	0	0	0	0	0	0	0	0	0	0	0	0	0	0	0	0	0	0	0	0	0	0	0	0	0	0	0	0	0
Otu1623	Unclassified Proteobacteria	0	0	0	0	0	0	0	0	0	0	0	0	0	0	0	0	0	0	0	0	0	0	0	3.97931e-05	0	0	0	0	0	0	0	0	0	0	0	0	0	0	0	0	0	0	0	0	0	0	0	0
Otu1624	Unclassified Rhodobacteraceae	0	0	0	0	0	0	0	0	0	0	0	0	0	0	0	0	0	0	0	0	0	0	0	0	0	0	0	5.67135e-05	0	0	0	0	0	0	0	0	0	0	0	0	0	0	0	0	0	0	0	0
Otu1625	Porphyromonas	0	0	0	0	0	0	0	0	0	0	0	0	0	0	0	0	0	0	0	0	0	0	0	0	0	0	0	0	0	0	0	2.95561e-05	0	0	0	0	0	0	0	0	0	0	0	0	0	3.51704e-05	0	0
Otu1626	Alistipes	0.000169119	0	0	0	0	0	0	0	0	0	0	0	0	0	0	0	0	0	0	0	0	0	0	0	0	0	0	0	0	0	0	0	0	0	0	0	0	0	0	0	0	0	0	0	0	0	0	0
Otu1627	Roseomonas	0	0	0	0	0	0	0	0	0	0	2.8767e-05	0	0	0	0	0	0	0	0	0	0	0	0	0	0	0	0	0	0	0	0	0	0	0	0	0	0	0	0	0	0	0	0	0	0	0	0	0
Otu1628	Unclassified Sphingomonadaceae	0	0.000119546	0	0	0	0	0	0	0	0	0	0	0	0	0	0	0	0	2.79979e-05	0	2.77917e-05	0	0	0	0	0	0	0	0	0	0	0	0	0	0	0	0	0	0	0	0	0	0	0	0	0	0	0
Otu1629	Unclassified Bacteria	0	0.000119546	0	0	0	0	0	0	0	0	0	0	0	0	0	0	0	0	0	0	0	0	0	0	0	0	0	0	0	0	0	0	0	0	0	0	0	0	0	0	0	0	0	0	0	0	0	0
Otu1630	Unclassified Bacteria	0	0	0	0	0	0	0	0	0	0	0	0	0	0	0	0	0	0	0	0	0	0	0	0	0	0	0	0	0	0	0	2.95561e-05	0	0	0	0	0	0	0	0	0	0	0	0	0	0	0	0
Otu1631	Unclassified Bacteria	0	0	0	0	0	0	0	0	0	0	0	0	0	0	0	0	0	0	0	0	0	0	0	0	0	0	0	0	0	0	0	0	0	0	0	0	0	0	0	0	0	0	0	0	0	0	0	0
Otu1632	Unclassified Clostridiales	0	0	0	0	0	0	0	0	0	0	0	0	0	0	0	0	0	0	0	0	0	0	0	3.97931e-05	0	0	0	0	0	0	0	0	0	0	0	0	0	0	0	0	0	0	0	0	0	0	0	0
Otu1633	OD1_genus_incertae_sedis	0	0	0	0	0	0	0	0	0	0	0	0	0	0	0	0	0	0	0	0	0	0	0	0	0	0	0	0	0	0	0	0	0	0	0	0	0	0	0	0	0	0	0	0	0	0	0	0
Otu1634	Unclassified Desulfobacteraceae	0	0	0	0	0	0	0	0	0	0	0	0	0	0	0	0	0	0	0	0	0	0	0	0	0	0	0	0	0	0	0	2.95561e-05	0	0	0	0	0	0	0	0	0	0	0	0	0	0	0	0
Otu1635	Phenylobacterium	0	0	0	0	0	0	0	0	0	0	0	0	0	0	0	0	0	0	0	2.56154e-05	0	0	0	0	0	0	0	0	0	0	0	0	0	0	0	0	0	0	0	0	0	0	0	0	0	0	0	0
Otu1636	Sphingomonas	0	0	0	0	0	0	0	0	0	0	0	0	0	0	0	0	0	0	0	0	0	0	0	0	0	0	0	0	0	0	0	0	0	0	0	0	0	0	0	0	0	0	0	0	0	0	0	0
Otu1637	Unclassified Betaproteobacteria	0	0	0	0	0	0	0	0	0	0	0	0	0	0	0	0	0	0	0	0	0	0	0	0	0	0	0	8.50702e-05	0	0	0	0	0	0	0	0	0	0	0	0	0	0	0	0	0	0	0	0
Otu1638	Desulfovibrio	0	0	0	0	0	0	0	0	0	0	0	0	0	0	0	0	0	0	0	0	0	0	0	0	0	0	0	0	0	0	0	0	0	0	0	0	0	0	0	0	0	0	0	0	0	0	0	0
Otu1639	Bosea	0	0	0	0	0	0	0	0	0	0	2.8767e-05	0	0	0	0	0	0	0	0	0	0	0	0	0	0	0	0	0	0	0	0	0	0	0	0	0	0	0	0	0	0	0	0	0	0	0	0	0
Otu1640	Thiocystis	0	0	0	0	0	0	0	0	0	0	0	0	0	0	0	0	0	0	0	0	0	0	0	3.97931e-05	0	0	0	0	0	0	0	0	0	0	0	0	0	0	0	0	0	0	0	0	0	0	0	0
Otu1641	Unclassified Bacteria	0	0	0	0	0	0	0	0	0	0	2.8767e-05	0	0	0	0	0	0	0	0	0	0	0	0	0	0	0	0	0	0	0	0	0	0	0	0	0	0	0	0	0	0	0	0	0	0	0	0	0
Otu1642	Unclassified Deltaproteobacteria	0	0	0	0	0	0	0	0	0	0	0	0	0	0	0	0	0	0	0	0	0	0	0	0	0	0	0	2.83567e-05	0	0	0	0	0	0	0	0	0	0	0	0	0	0	0	0	0	0	0	0
Otu1643	Unclassified Betaproteobacteria	0	0	0	0	0	0	0	0	0	0	2.8767e-05	0	0	0	0	0	0	0	0	0	0	0	0	0	0	0	0	0	0	0	0	0	0	0	0	0	0	0	0	0	0	0	0	0	0	0	0	0
Otu1644	Unclassified Fusobacteriaceae	0	0	0	0.000198491	0	0	0	0	0	0	0	0	0	0	0	0	0	0	0	0	0	0	0	0	0	0	0	0	0	0	0	0	0	0	0	0	0	0	0	0	0	0	0	0	0	0	0	0
Otu1645	Unclassified Gammaproteobacteria	0	0	0.000471448	0	0	0	0	0	0	0	0	0	0	0	0	0	0	0	0	0	0	0	0	0	0	0	0	0	0	0	0	0	0	0	0	0	0	0	0	0	0	0	0	0	0	0	0	0
Otu1646	Unclassified Proteobacteria	0	0	0	0	0	0	0	0	0	0	2.8767e-05	0	0	0	0	0	0	0	0	0	0	0	0	0	0	0	0	0	0	0	0	0	0	0	0	0	0	0	0	0	0	0	0	0	0	0	0	0
Otu1647	Unclassified Sphingobacteriales	0	0	0	0	0	0	0	0	0	0	0	0	0	0	0	0	0	0	0	0	0	0	0	0	0	0	0	0	0	0	0	0	0	0	0	0	0	0	0	0	0	0	0	0	0	0	0	0
Otu1648	Unclassified Caulobacteraceae	0	0	0	0	0	0	0	0	0	0	2.8767e-05	0	0	0	0	0	0	0	0	0	0	0	0	0	0	0	0	0	0	0	0	0	0	0	0	0	0	0	0	0	0	0	0	0	0	0	0	0
Otu1649	Unclassified Gammaproteobacteria	0	0	0	0	0	0	0	0	0	0	0	0	0	0	0	0	0	0	0	0	0	0	0	0	0	0	0	0	0	0	0	0	0	0	0	0	0	0	0	0	0	0	0	0	0	0	0	0
Otu1650	Simkania	0	0	0	0	0	0	0	0	0	0	0	0	0	0	0	0	0	0	0	0	0	0	0	0	0	0	0	0	0	0	0	0	0	0	0	0	0	0	0	0	0	0	0	0	0	0	0	0
Otu1651	Unclassified Alphaproteobacteria	0	0	0	0	0	0	0	0	0	0	0	0	0	0	0	0	0	0	0	0	0	0	0	0	0	0	0	0	0	0	0	0	0	0	0	0	0	0	0	0	0	0	0	0	0	0	0	0
Otu1652	Unclassified Betaproteobacteria	0	0	0	0	0	0	0	0	0	0	0	0	0	0	0	0	0	0	0	0	0	0	0	0	0	0	0	5.67135e-05	0	0	0	0	0	0	0	0	0	0	0	0	0	0	0	0	0	0	0	0
Otu1653	Unclassified Rhizobiales	0	0	0	0	0	0	0	0	0	0	0	0	0	0	0	0	0	0	0	0	0	0	0	0.000119379	0	0	0	0	0	0	0	0	0	0	0	0	0	0	0	0	0	0	0	0	0	0	0	0
Otu1654	Blastomonas	0	0	0	0	0	0	0	0	0	0	0	0	6.054e-05	0	0	0	0	0	0	0	0	0	0	0	0	0	0	0	0	0	0	0	0	0	0	0	0	0	0	0	0	0	0	0	0	0	0	0
Otu1655	Unclassified Sphingomonadaceae	0	0	0	0	0	0	0	0	0	0	2.8767e-05	0	0	0	0	0	0	0	0	0	0	0	0	0	0	0	0	0	0	0	0	0	0	0	0	0	0	0	0	0	0	0	0	0	0	0	0	0
Otu1656	Unclassified Burkholderiales	0	0	0	0	0	0	0	0	0	0	2.8767e-05	0	0	0	0	0	0	0	0	0	0	0	0	0	0	0	0	0	0	0	0	0	0	0	0	0	0	0	0	0	0	0	0	0	0	0	0	0
Otu1657	Unclassified Ruminococcaceae	0	0	0	0	0	0	0	0	0	0	2.8767e-05	0	0	0	0	0	0	0	0	0	0	0	0	0	0	0	0	0	0	0	0	0	0	0	0	0	0	0	0	0	0	0	0	0	0	0	0	0
Otu1658	Anaeroplasma	0	0	0	0	0	0	0	0	0	0	2.8767e-05	5.87147e-05	0	0	0	0	0	0	0	0	0	0	0	0	0	0	0	5.67135e-05	0	0	0	0	0	0	0	0	0	0	0	0	0	0	0	0	0	0	0	0
Otu1659	Helcococcus	0	0	0	0	0	0	0	0	0	0	0	0	0	0	0	0	0	0	0	0	0	0	0	3.97931e-05	0	0	0	0	0	0	0	0	0	0	0	0	0	0	0	0	0	0	0	0	0	0	0	0
Otu1660	Pasteuria	0	0	0	0	0	0	0	0	0	0	0	0	0	0	0	0	0	0	0	0	0	0	0	0	0	0	0	0	0	0	0	0	0	0	0	0	0	0	0	0	0	0	0	0	0	0	0	0
Otu1661	Unclassified Rhizobiales	0	0	0	0	0	0	0	0	0	0	5.75341e-05	0	0	0	0	0	0	0	0	0	0	0	0	0	0	0	0	0	0	0	0	0	0	0	0	0	0	0	0	0	0	0	0	0	0	0	0	0
Otu1662	Desulfovibrio	0	5.97729e-05	0	0	0	0	0	0	0	0	0	0	0	0	0	0	0	0	0	0	0	0	0	0	0	0	0	0	0	0	0	0	0	0	0	0	0	0	0	0	0	0	0	0	0	0	0	0
Otu1663	Unclassified Bacteria	0	0	0	0	0	0	0	0	0	0	0	0	0	0	0	0	0	0	0	0	0	0	0	0	0	0	0	0	0	0	0	0	0	0	0	0	0	0	0	0	0	0	0	0	0	0	0	0
Otu1664	Unclassified Bacteroidetes	0	0	0	0	0	0	0	0	0	0	0	0	0	0	0	0	0	0	0	0	0	0	0	0	0	0	0	0	0	0	0	0	0	0	0	0	0	0	0	0	0	0	0	0	0	0	0	0
Otu1665	Unclassified Bacteria	0.000422797	0	0	0	0	0	0	0	0	0	0	0	0	0	0	0	0	0	0	0	0	0	0	0	0	0	0	0	0	0	0	0	0	0	0	0	0	0	0	0	0	0	0	0	0	0	0	0
Otu1666	Unclassified Bacteria	0	0	0	0	0	0	0	0	0	0	0	0	0	0	0	0	0	0	0	0	0	0	0	0	0	0	0	8.50702e-05	0	0	0	0	0	0	0	0	0	0	0	0	0	0	0	0	0	0	0	0
Otu1667	Unclassified Bacteroidetes	0	0	0	0	0	0	0	0	0	0	0	0	0	0	0	0	0	0	0	0	0	0	0	0	0	0	0	0	0	0	0	0	0	0	0	0	0	0	0	0	0	0	0	0	0	0	0	0
Otu1668	Parvimonas	0	0	0	0	0	0	0	0	0	0	0	0	0	0	0	0	0	0	0	0	0	0	0	0	0	0	0	0	0	0	0	0	0	0	0	0	0	0	0	0	0	0	0	0	0	0	0	0
Otu1669	Unclassified Porphyromonadaceae	0	0	0	0	0	0	0	0	0	0	0	2.93574e-05	0	0	0	0	0	0	0	0	0	0	0	0	0	0	0	0	0	0	0	0	0	0	0	0	0	0	0	0	0	0	0	0	0	0	0	0
Otu1670	Unclassified Bacteria	0	0	0	0	0	0	0	0	0	0	0	0	0	0	0	0	0	0	8.39936e-05	0	0	0	0	0	0	0	0	0	0	0	0	0	0	0	0	0	0	0	0	0	0	0	0	0	0	0	0	0
Otu1671	Unclassified Rhodobacteraceae	0	0	0	0	0	0	0	0	0	0	0	0	0	0	0	0	0	0	0	0	0	0	0	0	0	0	0	0	0	0	0	0	0	0	0	0	0	0	0	0	0	0	0	0	0	0	0	0
Otu1672	Unclassified Actinomycetales	0	0	0	0	0	0	0	0	0	0	0	0	0	0	0	0	0	0	0	0	0	0	0	0	2.91715e-05	0	0	0	0	0	0	0	0	0	0	0	0	0	0	0	0	0	0	0	0	0	0	0
Otu1673	Unclassified Sphingomonadales	0	0	0	0	0	0	0	0	0	0	0	0	3.027e-05	0	0	0	0	0	0	0	0	0	0	0	0	0	0	0	0	0	0	0	0	0	0	0	0	0	0	0	0	0	0	0	0	0	0	0
Otu1674	Unclassified Chitinophagaceae	0	0	0	0	0	0	0	0	0	0	0	0	0	0	0	9.28031e-05	0	0	0	0	0	0	0	0	0	0	0	0	0	0	0	0	0	0	0	0	0	0	0	0	0	0	0	0	0	0	0	0
Otu1675	Unclassified Betaproteobacteria	0	0	0	0	0	0	0	0	0	0	0	0	0	0	0	0	0	0	0	0	0	0	0	0	0	0	0	0	0	0	0	0	0	0	0	0	0	0	0	0	0	0	4.35398e-05	0	0	0	0	0
Otu1676	Delftia	0	0	0	0	0	0	0	0	0	0	0	0	0	0	0	0	0	0	0	0	0	0	0	0	0	3.13322e-05	0	0	0	0	0	0	0	0	0	0	0	0	0	0	0	0	0	0	0	0	0	0
Otu1677	Nitrospira	0	0	0	0	0	0	0	0	0	0	0	0	0	0	0	0	0	0	0	0	0	0	0	0	0	0	0	0	0	0	0	0	0	0	0	0	0	0	0	0	0	0	0	0	0	0	0	0
Otu1678	Bdellovibrio	0	0	0	0	0	0	0	0	0	0	0	0	0	0	0	4.64016e-05	0	0	0	0	0	0	0	0	0	0	0	0	0	0	0	0	0	0	0	0	0	0	0	0	0	0	0	0	0	0	0	0
Otu1679	Legionella	0	0	0	0	0	0	0	0	0	0	0	0	0	0	0	0	0	0	0	0	0	0	0	0	0	0	0	0	0	0	0	0	0	0	0	0	0	0	0	0	0	0	4.35398e-05	0	0	0	0	0
Otu1680	Unclassified Bacteria	0	0	0	0	0	0	0	0	0	0	0	0	0	0	0	9.28031e-05	0	0	0	0	0	0	0	0	0	0	0	0	0	0	0	0	0	0	0	0	0	0	0	0	0	0	0	0	0	0	0	0
Otu1681	Unclassified Bacteria	0	0	0	0	0	0	0	0	0	0	0	0	0	0	0	0	0	0	0	0	0	0	0	0	0	0	0	0	0	0	0	0	0	0	0	0	0	0	0	0	0	0	4.35398e-05	0	0	0	0	0
Otu1682	Peptoniphilus	0	0	0	0	0	0	0	0	0	0	0	0	0	0	0	4.64016e-05	0	0	0	0	0	0	0	0	0	0	0	0	0	0	0	0	0	0	0	0	0	0	0	0	0	0	0	0	0	0	0	0
Otu1683	Armatimonadetes_gp2	0	0	0	0	0	0	0	0	0	0	0	0	0	0	0	0	0	0	0	0	0	0	0	0	0	0	0	0	0	0	0	0	0	0	0	0	0	0	0	0	0	0	2.17699e-05	0	0	0	0	0
Otu1684	Unclassified unclassified	0	0	0	0	0	0	0	0	0	0	0	0	3.027e-05	0	0	0	0	0	0	0	0	0	0	0	0	0	0	0	0	0	0	0	0	0	0	0	0	0	0	0	0	0	0	0	0	0	0	0
Otu1685	Unclassified Sphingomonadaceae	0	0	0	0	0	0	0	0	0	0	0	0	0	0	0	0	0	0	0	0	0	0	0	0	0	0	0	0	0	0	0	0	0	0	0	0	0	0	0	0	0	0	4.35398e-05	0	0	0	0	0
Otu1686	Unclassified Gammaproteobacteria	0	0	0	0	0	0	0	0	0	0	0	0	0	0	0	0	0	0	0	0	0	0	0	0	0	0	0	0	0	0	0	0	0	0	0	0	0	0	0	0	0	0	4.35398e-05	0	0	0	0	0
Otu1687	Mycobacterium	0	0	0	0	0	0	0	0	0	0	0	0	0	0	0	0	0	0	0	0	0	0	0	0	0	0	0	0	0	0	0	0	0	0	0	0	0	0	0	0	0	0	4.35398e-05	0	0	0	0	0
Otu1688	Caulobacter	0	0	0	0	0	0	0	0	0	0	0	0	0	0	0	0	7.75134e-05	0	0	0	0	0	0	0	0	0	0	0	0	0	0	0	0	0	0	0	0	0	0	0	0	0	0	0	0	0	0	0
Otu1689	Bdellovibrio	0	0	0	0	0	0	0	0	0	0	0	0	0	0	0	0	3.87567e-05	0	0	0	0	0	0	0	0	0	0	0	0	0	0	0	0	0	0	0	0	0	0	0	0	0	0	0	0	0	0	0
Otu1690	Unclassified Actinomycetales	0	0	0	0	0	0	0	0	0	0	0	0	0	0	0	0	0	0	0	0	0	0	0	0	0	3.13322e-05	0	0	0	0	0	5.91121e-05	0	0	0	0	0	0	0	0	0	0	0	0	0	0	0	0
Otu1691	Unclassified Bacteria	0	0	0	0	0	0	0	0	0	0	0	2.93574e-05	0	0	0	0	0	0	0	0	0	0	0	0	0	0	0	0	0	0	0	0	0	0	0	0	0	0	0	0	0	0	0	0	0	0	0	0
Otu1692	Unclassified Clostridiales	0	0	0	0	0	0	0	0	0	0	0	0	0	0	0	0	0	0	0	0	0	0	0	0	0	0	0	0	0	0	0	0	0	0	0	0	0	0	0	0	0	0	4.35398e-05	0	0	0	0	0
Otu1693	Unclassified Proteobacteria	0	0	0	0	0	0	0	0	0	0	0	0	0	0	0	0	0	0	0	0	0	0	0	0	0	3.13322e-05	0	0	0	0	0	0	0	0	0	0	0	0	0	0	0	0	0	0	0	0	0	0
Otu1694	Unclassified Betaproteobacteria	0	0	0	0	0	0	0	0	0	0	0	0	0	0	0	0	0	0	0	0	0	0	0	0	0	0	0	0	0	0	0	0	0	0	0	0	0	0	0	0	0	0	4.35398e-05	0	0	0	0	0
Otu1695	Unclassified Bacteria	0	0	0	0	0	0	0	0	0	0	0	0	0	0	0	0	0	0	0	0	0	0	0	0	2.91715e-05	0	0	0	0	0	0	0	0	0	0	0	0	0	0	0	0	0	0	0	0	0	0	0
Otu1696	Unclassified Sphingomonadaceae	0	0	0	0	0	0	0	0	0	0	0	0	0	0	0	0	0	0	0	0	5.55833e-05	0	0	0	0	0	0	0	0	0	0	0	0	0	0	0	0	0	0	0	0	0	0	0	0	0	0	0
Otu1697	Unclassified Bacteroidetes	0	0	0	0	0	0	0	0	0	0	0	0	0	0	0	0	0	0	0	0	0	0	0	0	0	0	0	0	0	0	0	0	0	0	0	0	0	0	0	0	0	0	2.17699e-05	0	0	0	0	0
Otu1698	Psychrobacter	0	0	0	0	0	0	0	0	0	0	0	0	0	0	0	0	0	0	0	0	0	0	0	0	0	0	0	0	0	0	0	0	0	0	0	0	0	0	0	0	0	0	0	0	0	0	0	0
Otu1699	Unclassified Aerococcaceae	0	0	0	0	0	0	0	0	0	0	0	0	0	0	0	0	0	0	0	0	0	0	0	0	2.91715e-05	0	0	0	0	0	0	0	0	0	0	0	0	0	0	0	0	0	0	0	0	0	0	0
Otu1700	Unclassified Bacteria	0	0	0.000117862	0	0	0	0	0	0	0	0	0	0	0	0	0	0	0	0	0	0	0	0	0	0	0	0	0	0	0	0	0	0	0	0	0	0	0	0	0	0	0	0	0	0	0	0	0
Otu1701	TM7_genus_incertae_sedis	0	0	0	0	0	0	0	0	0	0	0	0	0	0	0	0	0	0	0	0	0	0	0	0	0	0	0	0	0	0	0	0	3.09607e-05	0	0	0	0	0	0	0	0	0	0	0	0	0	0	0
Otu1702	Unclassified Rhizobiales	0	0	0	0	0	0	0	0	0	0	0	0	0	0	0	0	0	0	0	0	0	0	0	0	0	0	0	0	0	0	0	0	3.09607e-05	0	0	0	0	0	0	0	0	0	0	0	0	0	0	0
Otu1703	Unclassified Bacteria	0	0	5.8931e-05	0	0	0	0	0	0	0	0	0	0	0	0	0	0	0	0	0	0	0	0	0	0	0	0	0	0	0	0	0	0	0	0	0	0	0	0	0	0	0	0	0	0	0	0	0
Otu1704	Unclassified Betaproteobacteria	0	0	0	0	0	0	0	0	0	0	0	0	0	0	0	0	0	0	0	0	0	0	0	0	0	0	0	0	0	0	0	0	0	0	0	0	0	0	0	0	0	0	0	0	0	0	0	0
Otu1705	Unclassified Bacteroidetes	0	0	0	0	0	0	0	0	0	0	0	0	0	0	0	0	3.87567e-05	0	0	0	0	0	0	0	0.000175029	0	0	0	0	0	0	0	0	0	0	0	0	0	0	0	0	0	0	0	0	0	0	0
Otu1706	Unclassified Proteobacteria	0	0	0	0	0	0	0	0	0	0	0	5.87147e-05	0	0	0	0	0	0	0	0	0	0	0	0	0	0	0	0	0	0	0	0	0	0	0	0	0	0	0	0	0	0	0	0	0	0	0	0
Otu1707	Unclassified Flavobacteriaceae	0	0	0	0	0	0	0	0	0	0	0	0	0	0	0	9.28031e-05	0	0	0	0	0	0	0	0	0	0	0	0	0	0	0	0	0	0	0	0	0	0	0	0	0	0	0	0	0	0	0	0
Otu1708	Unclassified Bacteria	0	0	0	0	0	0	0	0	0	0	0	0	6.054e-05	0	0	0	0	0	0	0	0	0	0	0	0	0	0	0	0	0	0	0	0	0	0	0	0	0	0	0	0	0	0	0	0	0	0	0
Otu1709	Unclassified Clostridiales	0	0	0	0	0	0	0	0	0	0	0	2.93574e-05	0	0	0	0	0	0	0	0	0	0	0	0	0	0	0	0	0	0	0	0	0	0	0	0	0	0	0	0	0	0	0	0	0	0	0	0
Otu1710	Hydrogenophaga	0	0	0	0	0	0	0	0	0	0	0	0	6.054e-05	0	0	0	0	0	0	0	0	0	0	0	0	0	0	0	0	0	0	0	0	0	0	0	0	0	0	0	0	0	0	0	0	0	0	0
Otu1711	Unclassified Comamonadaceae	0	0	0	0	0	0	0	0	0	0	0	0	6.054e-05	0	0	0	0	0	0	0	0	0	0	0	0	0	0	0	0	0	0	0	0	0	0	0	0	0	0	0	0	0	0	0	0	0	0	0
Otu1712	Unclassified Bacteria	0	0	5.8931e-05	0	0	0	0	0	0	0	0	0	9.081e-05	0	0.000152099	0	0	0	0	0	0	0	0	0	0	0	0	0	0	0	0	0	3.09607e-05	0	0	0	0	0	0	0	0	0	0	0	0	0	0	0
Otu1713	Bdellovibrio	0	0	0	0	0	0	0	0	0	0	0	0	0	0	0	9.28031e-05	0	0	0	0	0	0	0	0	0	0	0	0	0	0	0	0	0	0	0	0	0	0	0	0	0	0	0	0	0	0	0	0
Otu1714	Unclassified Alphaproteobacteria	0	0	0	0	0	0	0	0	0	0	0	0	0	0	0	9.28031e-05	0	0	0	0	0	0	0	0	0	0	0	0	0	0	0	0	0	0	0	0	0	0	0	0	0	0	0	0	0	0	0	0
Otu1715	Oleispira	0	0	0	0	0	0	0	0	0	0	0	0	0	0	0	0	0	0	0	0	0	0	0	0	0	3.13322e-05	0	0	0	0	0	0	0	0	0	0	0	0	0	0	0	0	0	0	0	0	0	0
Otu1716	Roseibacillus	0	0	0	0	0	0	0	0	0	0	0	0	0	0	0	0	3.87567e-05	0	0	0	0	0	0	0	0	0	0	0	0	0	0	0	0	0	0	0	0	0	0	0	0	0	0	0	0	0	0	0
Otu1717	Unclassified Deltaproteobacteria	0	0	0	0	0	0	0	0	0	0	0	0	0	0	0	9.28031e-05	0	0	0	0	0	0	0	0	0	0	0	0	0	0	0	0	0	0	0	0	0	0	0	0	0	0	0	0	0	0	0	0
Otu1718	Unclassified Alphaproteobacteria	0	0	0	0	0	0	0	0	0	0	0	0	6.054e-05	0	0	0	0	0	0	0	0	0	0	0	0	0	0	0	0	0	0	0	0	0	0	0	0	0	0	0	0	0	0	0	0	0	0	0
Otu1719	Unclassified Firmicutes	0	0	0	0	0	0	0	0	0	0	0	2.93574e-05	0	0	0	0	0	0	0	0	0	0	0	0	0	0	0	0	0	0	0	0	0	0	0	0	0	0	0	0	0	0	0	0	0	0	0	0
Otu1720	Rhodopirellula	0	5.97729e-05	0	0	0	0	0	0	0	0	0	0	0	0	0	0	0	0	0	0	0	0	0	0	0	0	0	0	0	0	0	0	0	0	0	2.84519e-05	0.000136986	0	3.03582e-05	0	0	0	6.53097e-05	0	0	0	0	0
Otu1721	Unclassified Firmicutes	0	0	0	0	0	0	0	0	0	0	0	0	3.027e-05	0	0	0	0	0	0	0	0	0	0	0	0	0	0	0	0	0	0	0	0	0	0	0	0	0	0	0	0	0	0	0	0	0	0	0
Otu1722	Unclassified Oxalobacteraceae	0	0	0	0	0	0	0	0	0	0	0	0	0	0	0	0	0	0	0	0	0	0	0	0	0	0	0	0	0	0	0	0	0	0	0	0	0	0	0	0	0	0	4.35398e-05	0	0	0	0	0
Otu1723	Planctomyces	0	0	0	0	0	0	0	0	0	0	0	0	3.027e-05	0	0	0	0	0	0	0	0	0	0	0	0	0	0	0	0	0	0	0	0	0	0	0	0	0	0	0	0	0	0	0	0	0	0	0
Otu1724	Unclassified Betaproteobacteria	0	0	0	0	0	0	0	0	0	0	0	0	0	0	0	0	0	0	0	0	0	0	0	0	0	0	0	0	0	0	0	0	0	0	0	0	0	0	0	0	0	0	0	0	0	0	0	0
Otu1725	Unclassified unclassified	0	0	0	0	0	0	0	0	0	0	0	0	0	0	0	0	0	0	0	0	0	0	0	0	0	3.13322e-05	0	0	0	0	0	0	0	0	0	0	0	0	0	0	0	0	0	0	0	0	0	0
Otu1726	Unclassified Bacteria	0	0	0	0	0	0	0	0	0	0	0	0	0	0	0	0	0	0	0	0	0	0	0	0	0	0	0	0	0	0	0	0	0	0	0	0	0	0	0	0	0	0	4.35398e-05	0	0	0	0	0
Otu1727	Unclassified Burkholderiales	0	0	0	0	0	0	0	0	0	0	0	0	0	0	0	4.64016e-05	0	0	0	0	0	0	0	0	0	0	0	0	0	0	0	0	0	0	0	0	0	0	0	0	0	0	0	0	0	0	0	0
Otu1728	Unclassified Rhodobacteraceae	0	0	0	0	0	0	0	0	0	0	0	0	0	0	0	0	0	0	0	0	0	0	0	0	0	3.13322e-05	0	0	0	0	0	0	0	0	0	0	0	0	0	0	0	0	0	0	0	0	0	0
Otu1729	Unclassified Deltaproteobacteria	0	0	0	0	0	0	0	0	0	0	0	0	0	0	0	9.28031e-05	0	0	0	0	0	0	0	0	0	0	0	0	0	0	0	0	0	0	0	0	0	0	0	0	0	0	0	0	0	0	0	0
Otu1730	Unclassified Alphaproteobacteria	0	0	0	0	0	0	0	0	0	0	0	0	0	0	0	4.64016e-05	0	0	0	0	0	0	0	0	0	0	0	0	0	0	0	0	0	0	0	0	0	0	0	0	0	0	0	0	0	0	0	0
Otu1731	Mycobacterium	0	0	0	0	0	0	0	0	0	0	0	2.93574e-05	0	0	0	0	0	0	0	0	0	0	0	0	0	0	0	0	0	0	0	0	0	0	0	0	0	0	0	0	0	0	0	0	0	0	0	0
Otu1732	Rothia	0	0	0	0	0	0	0	0	0	0	0	0	0	0	0	0	0	0	0	0	0	0	0	0	0	0	0	0	0	0	0	0	0	0	0	0	0	0	0	0	0	5.10061e-05	0	0	0	0	0	0
Otu1733	Unclassified Bacteria	0	0	0	0	0	0	0	0	0	0	0	5.87147e-05	0	0	0	0	0	3.22695e-05	0	0	0	0	0	0	0	0	0	0	0	0	0	0	0	0	0	0	0	0	0	0	0	0	0	0	0	0	0	0
Otu1734	Unclassified Actinomycetales	0	0	0	0	0	0	0	0	0	0	0	0	0	0	0	0	0	0	0	0	0	0	0	0	0	0	0	0	0	0	0	0	0	0	0	0	0	0	0	0	0	0	0	0	0	0	2.91945e-05	0
Otu1735	Unclassified Planctomycetaceae	0	5.97729e-05	0	0	0	0	0	0	0	0	0	0.000117429	0.00012108	0	0	0	0	0	0	0	0	0	0	3.97931e-05	0	0	0	2.83567e-05	0	0	0	0	0	0	0	0	0	3.1346e-05	0	0	0	0	0	0	0	0	0	0
Otu1736	Sphingomonas	0	0	0	0	0	0	0	0	0	0	0	0	0	0	0	0	0	3.22695e-05	0	0	0	0	0	0	0	0	0	0	0	0	0	0	0	0	0	0	0	0	0	0	0	0	0	0	0	0	0	0
Otu1737	Dialister	0	0	0	0	0	0	0	0	0	0	0	0	0	0	0	0	0	0	0	0	0	0	0	0	0	0	0	0	0	0	0	0	0	0	0	0	0	0	0	0	0	0	0	0	0	0	2.91945e-05	0
Otu1738	Unclassified Verrucomicrobia	0	0	0	0	0	0	0	0	0	0	0	0	0	0	0	0	0	0	0	0	0	0	0	0	0	0	0	0	0	0	0	0	0	0	0	0	0	0	0	0	0	2.5503e-05	0	0	0	0	0	0
Otu1739	Lutibacter	0	0	0	0	0	0	0	0	0	0	0	0	0	0	0	0	0	9.68085e-05	0	0	0	0	0	0	0	0	0	0	0	0	0	0	0	0	0	0	0	0	0	0	0	0	0	0	0	0	0	0
Otu1740	Unclassified Burkholderiales	0	0	0	0	0	0	0	0	0	0	0	0	0	0	0	0	0	3.22695e-05	0	0	0	0	0	0	0	0	0	0	0	0	0	0	0	0	0	0	0	0	0	0	0	0	0	0	0	0	0	0
Otu1741	Saccharofermentans	0	0	0	0	0	0	0	0	0	0	0	0	0	0	0	0	0	0	0	0	0	0	0	0	0	0	0	0	0	0	0	0	0	0	0	0	0	0	0	0	0	0	0	0	0	0	2.91945e-05	0
Otu1742	Gemella	0	0	0	0	0	0	0	0	0	0	0	0	0	0	0	0	0	0	0	0	0	0	0	0	0	0	0	0	0	0	0	0	0	0	0	0	0	0	0	0	0	2.5503e-05	0	0	0	0	0	0
Otu1743	Desulfomonile	0	0	0	0	0	0	0	0	0	0	0	0	0	0	0	0	0	0	0	0	0	0	0	0	2.91715e-05	0	0	0	0	0	0	0	0	0	0	0	0	0	0	0	0	0	0	0	0	0	0	0
Otu1744	Unclassified Bacteria	0	0	0	0	0	0	0	0	0	0	0	0	0	0	0	0	0	0	0	0	0	0	0	0	0	0	0	0	0	0	0	0	0	0	0	0	0	0	0	0	0	5.10061e-05	0	0	0	0	0	0
Otu1745	Unclassified Bacteria	0	0	0	0	0	0	0	0	0	0	0	0	0	0	0	0	0	0	0	0	8.3375e-05	0	0	0	0	0	0	0	0	0	0	0	0	0	0	0	0	0	0	0	0	0	0	0	0	0	0	0
Otu1746	Unclassified Actinomycetales	0	0	0	0	0	0	0	0	0	0	0	0	0	0	0	0	0	3.22695e-05	0	0	0	0	0	0	0	0	0	0	0	0	0	0	0	0	0	0	0	0	0	0	0	0	0	0	0	0	0	0
Otu1747	Unclassified Bradyrhizobiaceae	0	0	0	0	0	0	0	0	0	0	0	0	0	0	0	0	0	0	0	0	2.77917e-05	0	0	0	0	0	0	0	0	0	0	0	0	0	0	0	0	0	0	0	0	0	0	0	0	0	0	0
Otu1748	Desulfocapsa	0	0	0	0	0	0	0	0	0	0	0	0	0	0	0	0	0	0	0	0	0	0	0	0	0	0	0	0	0	0	0	0	0	0	0	0	0	0	0	0	0	0	0	0	0	0	2.91945e-05	0
Otu1749	Unclassified Bacteria	0	0	0	0	0	0	0	0	0	0	0	0	0	0	0	0	0	3.22695e-05	0	0	0	0	0	0	0	0	0	0	0	0	0	0	0	0	0	0	0	0	0	0	0	0	0	0	0	0	0	0
Otu1750	Unclassified Burkholderiales	0	0	0	0	0	0	0	0	0	0	0	0	0	0	0	0	0	0	0	0	2.77917e-05	0	0	0	0	0	0	0	0	0	0	0	0	0	0	0	0	0	0	0	0	0	0	0	0	0	0	0
Otu1751	Unclassified Xanthomonadaceae	0	0	0	0	0	0	0	0	0	0	0	2.93574e-05	0	0	0	0	0	0	0	0	0	0	0	0	0	0	0	0	0	0	0	0	0	0	0	0	0	0	0	0	0	0	0	0	0	0	0	0
Otu1752	Unclassified Comamonadaceae	0	0	0	0	0	0	0	0	0	0	0	0	0	0	0	0	0	0	0	0	0	0	0	0	0	0	0	0	0	0	0	0	0	0	0	0	0	0	0	0	0	2.5503e-05	0	0	0	0	0	0
Otu1753	Prevotella	0	0	0	0	0	0	0	0	0	0	0	0	0	0	0	0	0	0	0	0	0	0	0	0	0	0	0	0	0	0	0	0	0	0	0	0	0	0	0	0	0	0	0	0	0	0	0.00119698	0
Otu1754	Unclassified Bacteria	0.000930154	0	0.000235724	0.000198491	0	0	0	0	0	0	0	0	0	0	0	0	0	0	0	0	2.77917e-05	0	0	0	0	0	0	0	0	0	0	0	0	0	0	0	0	0	0	0	0	0	0	0	0	0	0	0
Otu1755	Bosea	0	0	0	0	0	0	0	0	0	0	0	0	0	0	0	0	0	0	0	0	2.77917e-05	0	0	0	0	0	0	0	0	0	0	0	0	0	0	0	0	0	0	0	0	0	0	0	0	0	0	0
Otu1756	Bdellovibrio	0	0	0	0	0	0	0	0	0	0	0	0	0	0	0	0	3.87567e-05	0	0	0	0	0	0	0	0	0	0	0	0	0	0	0	0	0	0	0	0	0	0	0	0	0	0	0	0	0	0	0
Otu1757	Unclassified Sphingomonadaceae	0	0	0	0	0	0	0	0	0	0	0	0	0	0	0	0	7.75134e-05	0	0	0	0	0	0	0	0	0	0	0	0	0	0	0	0	0	0	0	0	0	0	0	0	0	0	0	0	0	0	0
Otu1758	Unclassified Clostridiales	0	0	0	0	0	0	0	0	0	0	0	0	0	0	0	0	0	0	0	0	0	0	0	0	0	0	0	0	0	0	0	0	0	0	0	0	0	0	0	0	0	0	0	0	0	0	2.91945e-05	0
Otu1759	Unclassified Caulobacteraceae	0	0	0	0	0	0	0	0	0	0	0	0	0	0	0	0	0	3.22695e-05	0	0	0	0	0	0	0	0	0	0	0	0	0	0	0	0	0	0	0	0	0	0	0	0	0	0	0	0	0	0
Otu1760	Unclassified Rhizobiales	0	0	0	0	0	0	0	0	0	0	0	0	0	0	0	0	0	3.22695e-05	0	0	0	0	0	0	0	0	0	0	0	0	0	0	0	0	0	0	0	0	0	0	0	0	0	0	0	0	0	0
Otu1761	Unclassified Proteobacteria	0	0	0	0	0	0	0	0	0	0	0	0	0	0	0	0	0	0	0	0	0	0	0	0	0	0	0	0	0	0	0	0	0	0	0	0	0	0	0	0	0	2.5503e-05	0	0	0	0	0	0
Otu1762	Unclassified Proteobacteria	0	0	0	0	0	0	0	0	0	0	0	0	0	0	0	0	0	0	0	0	2.77917e-05	0	0	0	0	0	0	0	0	0	0	0	0	0	0	0	0	0	0	0	0	0	0	0	0	0	0	0
Otu1763	Unclassified Rhizobiales	0	0	0	0	0	0	0	0	0	0	0	0	0	0	0	0	0	0	0	0	0	0	0	0	0	0	0	0	0	0	0	0	0	0	0	0	0	0	0	0	0	0	2.17699e-05	0	0	0	0	0
Otu1764	Unclassified Bacteria	0	0	0	0	0	0	0	0	0	0	0	0	0	0	0	0	0	0	0	0	2.77917e-05	0	0	0	0	0	0	0	0	0	0	0	0	0	0	0	0	0	0	0	0	0	0	0	0	0	0	0
Otu1765	Armatimonadetes_gp5	0	0	0	0	0	0	0	0	0	0	0	0	0	0	0.000101399	0	0	0	0	0	5.55833e-05	0	0	0	0	0	0	0	0	0	0	0	0	0	0	0	0	0	0	0	0	0	0	0	0	0	0	0
Otu1766	Armatimonas_Armatimonadetes_gp1	0	0	0	0	0	0	0	0	0	0	0	2.93574e-05	0	0	0	0	3.87567e-05	0	0	0	0	0	0	0	0	0	0	0	0	0	0	0	0	0	0	0	0	0	0	0	0	0	0	0.000104105	0	0	0	0
Otu1767	Unclassified Bacteria	0	0	0	0	0	0	0	0	0	0	0	0	0	0	0	0	0	0	0	0	0	0	0	0	0	0	0	0	0	0	0	0	0	0	0	0	0	0	0	0	0	0	0	0	0	0	2.91945e-05	0
Otu1768	Saccharofermentans	0	0	0	0	0	0	0	0	0	0	0	0	0	0	0	0	0	0	0	0	0	0	0	0	0	0	0	0	0	0	0	0	0	0	0	0	0	0	0	0	0	0	0	0	0	0	2.91945e-05	0
Otu1769	Hydrogenophaga	0	0	0	0	0	0	0	0	0	0	0	0	0	0	0	0	0	0	0	0	0	0	0	0	0	0	2.9391e-05	0	0	0	0	0	0	0	0	0	0	0	0	0	0	0	0	0	0	0	0	0
Otu1770	Unclassified Rhodobacteraceae	0	0	0	0	0	0	0	0	0	0	0	0	0	0	0	0	0	0	0	0	0	0	0	0	0	3.13322e-05	0	0	0	0	0	0	0	0	0	0	0	0	0	0	0	0	0	0	0	0	0	0
Otu1771	Unclassified Betaproteobacteria	0	0	0	0	0	0	0	0	0	0	0	0	0	0	0	0	0	0	0	0	5.55833e-05	0	0	0	0	0	0	0	0	0	0	0	0	0	0	0	0	0	0	0	0	0	0	0	0	0	0	0
Otu1772	Bosea	0	0	0	0	0	0	0	0	0	0	0	0	0	0	0	0	0	0	0	0	5.55833e-05	0	0	0	0	0	0	0	0	0	0	0	0	0	0	0	0	0	0	0	0	0	0	0	0	0	0	0
Otu1773	Unclassified Sphingobacteriales	0	0	0	0	0	0	0	0	0	0	0	0	0	0	0	0	0	0	0	0	0	0	0	0	0	3.13322e-05	0	0	0	0	0	0	0	0	0	0	0	0	0	0	0	0	0	0	0	0	0	0
Otu1774	Unclassified Bacteria	0	0	0	0	0	0	0	0	0	0	0	0	0	0	0	0	0	0	0	0	0	0	0	0	0	0.0010653	0	0	0	0	0	0	0	0	0	0	0	0	0	0	0	0	0	0	0	0	0	0
Otu1775	Unclassified Actinomycetales	0	0	0	0	0	0	0	0	0	0	0	0	0	0	0	0	0	3.22695e-05	0	0	0	0	0	0	0	0	0	0	0	0	0	0	0	0	0	0	0	0	0	0	0	0	0	0	0	0	0	0
Otu1776	Unclassified Proteobacteria	0	0	0	0	0	0	0	0	0	0	0	0	0	0	0	0	0	0	0	0	0	0	0	0	0	0	0	0	0	0	0	0	0	0	0	0	0	0	0	0	0	0	0	0	0	0	5.8389e-05	0
Otu1777	Unclassified Betaproteobacteria	0	0	0	0	0	0	0	0	0	0	0	0	0	0	0	0	0	0	0	0	2.77917e-05	0	0	0	0	0	0	0	0	0	0	0	0	0	0	0	0	0	0	0	0	0	0	0	0	0	0	0
Otu1778	Unclassified Rhodobacteraceae	0	0	0	0	0	0	0	0	0	0	0	0	0	0	0	0	0	0	0	0	0	0	0	0	0	0	0	0	0	0	0	0	0	0	0	0	0	0	0	0	0	0	2.17699e-05	0	0	0	0	0
Otu1779	Bdellovibrio	0	0	0	0	0	0	0	0	0	0	0	2.93574e-05	0	0	0	0	0	0	0	0	0	0	0	0	0	0	0	0	0	0	0	0	0	0	0	0	0	0	0	0	0	0	0	0	0	0	0	0
Otu1780	Unclassified Alphaproteobacteria	0	0	0	0	0	0	0	0	0	0	0	0	0	0	0	0	0	3.22695e-05	0	0	0	0	0	0	0	0	0	0	0	0	0	0	0	0	0	0	0	0	0	0	0	0	0	0	0	0	0	0
Otu1781	Unclassified unclassified	0	0	0	0	0	0	0	0	0	0	0	0	0	0	0	0	0	0	0	0	0	4.11032e-05	0	0	0	0	0	0	0	0	0	0	0	0	0	0	0	0	0	0	0	0	4.35398e-05	0	0	0	0	0
Otu1782	Unclassified Bacteria	0	0	0	0	0	0	0	0	0	0	0	0	0	0	0	0	0	6.4539e-05	0	0	0	0	0	0	0	0	0	0	0	0	0	0	0	0	0	0	0	0	0	0	0	0	0	0	0	0	0	0
Otu1783	Unclassified Bacteria	0	0	0	0	0	0	0	0	0	0	0	0	0	0	0	0	0	0	0	0	0	0	0	0	0	0	0	0	0	0	0	0	0	0	0	0	0	0	0	0	0	0	0	0	0	0	2.91945e-05	0
Otu1784	Unclassified Bacteria	0	0	0	0	0	0	0	0	0	0	0	0	0	0	0	0	0	0	0	0	0	0	0	0	0	0	0	0	0	0	0	0	0	0	0	0	0	0	0	0	0	0	0	0	0	3.51704e-05	2.91945e-05	0
Otu1785	Unclassified Bacteria	0	0	0	0	0	0	0	0	0	0	0	0	0	0	0	0	0	0	0	0	5.55833e-05	0	0	0	0	0	0	0	0	0	0	0	0	0	0	0	0	0	0	0	0	0	0	0	0	0	0	0
Otu1786	Unclassified Alphaproteobacteria	0	0	0	0	0	0	0	0	0	0	0	0	0	0	0	0	3.87567e-05	0	0	0	0	0	0	0	0	0	0	0	0	0	0	0	0	0	0	0	0	0	0	0	0	0	0	0	0	0	0	0
Otu1787	Unclassified Betaproteobacteria	0	0	0	0	0	0	0	0	0	0	0	0	0	0	0	0	0	0	0	0	0	0	0	0	0	0	0	0	0	0	0	0	0	0	0	0	0	0	0	0	0	0	0	0	0	0	0	0
Otu1788	Unclassified Bacteria	0	0	0	0	0	0	0	0	0	0	0	0	0	0	0	0	0	0	0	0	0	0	0	0	0	0	0	0	0	0	0	0	0	0	0	0	0	0	0	0	0	2.5503e-05	0	0	0	0	0	0
Otu1789	Unclassified Bacteria	0	0	0	0	0	0	0	0	0	0	0	0	0	0	0	0	0	3.22695e-05	0	0	0	0	0	0	0	0	0	0	0	0	0	0	0	0	0	0	0	0	0	0	0	0	0	0	0	0	0	0
Otu1790	Unclassified Alphaproteobacteria	0	0	0	0	0	0	0	0	0	0	0	5.87147e-05	0	0	0	0	0	0	0	0	0	0	0	0	0	0	0	0	0	0	0	0	0	0	0	0	0	0	0	0	0	0	0	0	0	0	0	0
Otu1791	Unclassified Alphaproteobacteria	0	0	0	0	0	0	0	0	0	0	0	0	0	0	0	0	0	0	0	0	5.55833e-05	0	0	0	0	0	0	0	0	0	0	0	0	0	0	0	0	0	0	0	0	0	0	0	0	0	0	0
Otu1792	Catellibacterium	0	0	0	0	0	0	0	0	0	0	0	0	0	0	0	0	0	0	0	0	0	0	0	0	0	0	0	0	0	0	0	0	0	0	0	0	0	0	0	0	0	0	0	0	0	0	5.8389e-05	0
Otu1793	Unclassified Bacteroidetes	0	0	0	6.61638e-05	0	0	0	0	0	0	0	0	0.0003027	0	0	0	7.75134e-05	3.22695e-05	0	0	0	0	0	0.000119379	0	0.000156661	0	0	0	0	0	0	0	0	0	0	0	0	0	0	0	0	0	0	0	0	0	0
Otu1794	Unclassified Bacteria	0	0	0	0	0	0	0	0	0	0	0	0	0	0	0	0	0	0	0	5.12308e-05	0	0	0	0	0	0	0	0	0	0	0	0	0	0	0	0	0	0	0	0	0	0	0	0	0	0	0	0
Otu1795	Unclassified Comamonadaceae	0	0	0	0	0	0	0	0	0	0	0	0	0	0	0	4.64016e-05	0	0	0	0	0	0	0	0	0	0	0	0	0	0	0	0	0	0	0	0	0	0	0	0	0	0	0	0	0	0	0	0
Otu1796	Unclassified Proteobacteria	0	0	0.000176793	0	0	0	0	0	0	0	0	0	0	0	0	0	0	0	0	0	0	0	0	0	0	0	0	0	0	0	0	0	0	0	0	0	0	0	0	0	0	0	0	0	0	0	0	0
Otu1797	Unclassified Bacteria	0	0	0	0	0	0	0	0	0	0	0	0	0	0	0	0	0	0	0	0	0	0	0	0	0	0	0	0	0	0	0	0	3.09607e-05	0	0	0	0	0	0	0	0	0	0	0	0	0	0	0
Otu1798	Unclassified Bacteria	0	0	0	0	0	0	0	0	0	0	0	0	0	0	0	0	0	0	0	0	0	0	0	0	0	0	0	0	0	0	0	0	0	0	0	0	0	0	0	0	0	0	0	0	0	3.51704e-05	0	0
Otu1799	Aminobacter	0	0	0	0	0	0	0	0	0	0	0	0	0	0	0	9.28031e-05	0	0	0	0	0	0	0	0	0	0	0	0	0	0	0	0	0	0	0	0	0	0	0	0	0	0	0	0	0	0	0	0
Otu1800	Unclassified Bacteria	0	0	0	0	0	0	0	0	0	0	0	0	0	0	0	0	0	0	0	0	0	0	0	0	0	0	0	0	0	0	0	0	0	0	0	0	0	0	0	0	0	0	0	0	0	0	0	2.83503e-05
Otu1801	Lactobacillus	0	0	0	0	0	0	0	0	0	0	0	0	0	0	0	0	0	0	0	7.68462e-05	0	0	0	0	0	0	0	0	0	0	0	0	0	0	0	0	0	0	0	0	0	0	0	0	0	0	0	0
Otu1802	Unclassified Bacteria	0	0	0	0	0	0	0	0	0	0	0	0	0	0	0	0	0	0	0	0	0	0	0	0	0	0	0	0	0	0	0	0	0	0	0	0	0	0	0	0	0	0	0	0	0	0	0	5.67006e-05
Otu1803	Fluviicola	0	0	0.000176793	0	0	0	0	0	0	0	0	0	0	0	0	0	0	0	0	0	0	0	0	0	0	0	0	0	0	0	0	0	0	0	0	0	0	0	0	0	0	0	0	0	0	0	0	0
Otu1804	Hyphomonas	0	0	0	0	0	0	0	0	0	0	0	0	0	0	0	0	0	0	0	0	0	0	0	0	0	0	0	0	0	0	0	0	0	0	0	0	0	0	0	0	0	0	0	0	0	3.51704e-05	0	0
Otu1805	Unclassified Bacteria	0	0	0	0	0	0	0	0	0	0	0	0	0	0	0	0	3.87567e-05	0	0	0	0	0	0	0	0	0	0	0	0	0	0	0	0	0	0	0	0	0	0	0	0	0	0	0	0	0	0	0
Otu1806	Prevotella	0	0	5.8931e-05	0	0	0	0	0	0	0	0	0	0	0	0	0	0	0	0	0	0	0	0	0	0	0	0	0	0	0	0	0	0	0	0	0	0	0	0	0	0	0	0	0	0	0	0	0
Otu1807	Unclassified Comamonadaceae	0	0	5.8931e-05	0	0	0	0	0	0	0	0	0	0	0	0	0	0	0	0	0	0	0	0	0	0	0	0	0	0	0	0	0	0	0	0	0	0	0	0	0	0	0	0	0	0	0	0	0
Otu1808	Unclassified Bacteria	0	0	0	0	0	0	0	0	0	0	0	0	0	0	0	4.64016e-05	0	0	0	0	0	0	0	0	0	0	0	0	0	0	0	0	0	0	0	0	0	0	0	0	0	0	0	0	0	0	0	0
Otu1809	Unclassified Bacteria	0	0	0.000294655	0	0	0	0	0	0	0	0	0	0	0	0	0	0	0	0	0	0	0	0	0	0	0	0	0	0	0	0	0	0	0	0	0	0	0	0	0	0	0	0	0	0	0	0	0
Otu1810	Unclassified Beijerinckiaceae	0	0	0	0	0	0	0	0	0	0	0	0	0	0	0	0	7.75134e-05	0	0	0	0	0	0	0	0	0	0	0	0	0	0	0	0	0	0	0	0	0	0	0	0	0	0	0	0	0	0	0
Otu1811	Flavobacterium	0	0	0	0	0	0	0	0	0	0	0	0	0	0	0	0.000139205	0	0	0	0	0	0	0	0	0	0	0	0	0	0	0	0	0	0	0	0	0	0	0	0	0	0	0	0	0	0	0	0
Otu1812	Legionella	0	0	5.8931e-05	0	0	0	0	0	0	0	0	0	0	0	0	0	0	0	0	0	0	0	0	0	0	0	0	0	0	0	0	0	0	0	0	0	0	0	0	0	0	0	0	0	0	0	0	0
Otu1813	Unclassified Bradyrhizobiaceae	0	0	0	0	0	0	0	0	0	0	0	0	0	0	0	0	3.87567e-05	0	0	0	0	0	0	0	0	0	0	0	0	0	0	0	0	0	0	0	0	0	0	0	0	0	0	0	0	0	0	0
Otu1814	Unclassified Bacteria	0	0	0.000235724	0	0	0	0	0	0	0	0	0	0	0	0	0	0	0	0	0	0	0	0	0	0	0	0	0	0	0	0	0	0	0	0	0	0	0	0	0	0	0	0	0	0	0	0	0
Otu1815	Gp6	0	0	0	0	0	0	0	0	0	0	0	0	0.00033297	0	0	0	0	0	0	0	0	0	0	0	0	0	0	0	0	0	0	0	0	0	0	0	0	0	0	0	0	0	0	0	0	0	0	0
Otu1816	Unclassified Bacteria	0	0	0	0	0	0	0	0	0	0	0	0	0	0	0	0	0	0	0	0	0	0	0	0	0	0	0	0	0	0	0	0	0	0	0	0	0	0	0	0	0	0	0	0	0	0	0	2.83503e-05
Otu1817	Unclassified Bacteria	0	0	0	0	0	0	0	0	0	0	0	0	0	0	0	0	0	0	0	0	0	0	0	0	0	0	0	0	0	0	0	0	3.09607e-05	0	0	0	0	0	0	0	0	0	0	0	0	0	0	0
Otu1818	Unclassified Burkholderiales	0	0	0	0	0	0	0	0	0	0	0	0	0	0	0	0	0	0	0	2.56154e-05	0	0	0	0	0	0	0	0	0	0	0	0	0	0	0	0	0	0	0	0	0	0	0	0	0	0	0	0
Otu1819	Unclassified Alphaproteobacteria	0	0	0	0	0	0	0	0	0	0	0	0	0	0	0	0	0	0	0	0	0	0	0	0	0	0	2.9391e-05	0	0	0	0	0	0	0	0	0	0	0	0	0	0	0	0	0	0	0	0	0
Otu1820	Unclassified Clostridiales_Incertae_Sedis_XI	0	0	0	0	0	0	0	0	0	0	0	0	0	0	0	0	0	0	0	0	0	0	0	0	0	0	0	0	0	0	0	0	3.09607e-05	0	0	0	0	0	0	0	0	0	0	0	0	0	0	0
Otu1821	Unclassified Gammaproteobacteria	0	0	0.000117862	0	0	0	0	0	0	0	0	0	0	0	0	0	0	0	0	0	0	0	0	0	0	0	0	0	0	0	0	0	0	0	0	0	0	0	0	0	0	0	0	0	0	0	0	0
Otu1822	Unclassified Burkholderiales	0	0	0	0	0	0	0	0	0	0	0	0	0	0	0	0	3.87567e-05	0	0	0	0	0	0	0	0	0	0	0	0	0	0	0	0	0	0	0	0	0	0	0	0	0	0	0	0	0	0	0
Otu1823	Unclassified Bacteria	0	0	0	0	0	0	0	0	0	0	0	0	3.027e-05	0	0	0	0	0	0	0	0	0	0	0	0	0	0	0	0	0	0	0	0	0	0	0	0	0	0	0	0	0	0	0	0	0	0	0
Otu1824	Unclassified Bacteria	0	0	0	0	0	0	0	0	0	0	0	0	9.081e-05	0	0	0	0	0	0	0	0	0	0	0	0	0	0	0	0	0	0	0	0	0	0	0	0	0	0	0	0	0	0	0	0	0	0	0
Otu1825	Unclassified Xanthomonadaceae	0	0.000119546	0	0	0	0	0	0	0.000237192	0	0	0	0	0	0	0	0	0	0	0	0	0	0	0	0	0	0	0	0	0	0	0	0	0	0	0	0	0	0	0	0	0	0	0	0	0	0	0
Otu1826	Unclassified Bacteria	0	0	0	0	0	0	0	0	0.000759013	0	0	0	0	0	0	0	0	0	0	0	0	0	0	0	0	0	0	0	0	0	0	0	0	0	0	0	0	0	0	0	0	0	0	0	0	0	0	0
Otu1827	Unclassified Burkholderiales	0	0	0	0	0	0	0	0	0	0	0	0	0	0	0	0	0	0	0	0	0	0	0	0	0	0	0	0	0	0	0	0	3.09607e-05	0	0	0	0	0	0	0	0	0	0	0	0	0	0	0
Otu1828	Unclassified Comamonadaceae	0	0	0	0	0	0	0	0	0	0	0	0	0	0	0	0	0	0	0	0	0	0	0	0	0	0	0	0	0	0	0	0	3.09607e-05	0	0	0	0	0	0	0	0	0	0	0	0	0	0	0
Otu1829	Curvibacter	0	0	0	0	0	0	0	0	0	0	0	0	0	0	0	0	0	0	0	0	0	0	0	0	0	0	2.9391e-05	0	0	0	0	0	0	0	0	0	0	0	0	0	0	0	0	0	0	0	0	0
Otu1830	Unclassified Burkholderiales	0	0	0	0	0	0	0	0	0	0	2.8767e-05	0	0	0	0	0	0	0	0	0	0	0	0	0	0	0	0	0	0	0	0	0	0	0	0	0	0	0	0	0	0	0	0	0	0	0	0	0
Otu1831	Unclassified Bacteria	0	0	0	0	0	0	0	0	0	0	0	0	0	0	0	0	0	0	0	0	0	0	0	0	0	0	0	0	0	0	0	0	0	0	0	0	0	0	0	0	0	0	0	0	0	3.51704e-05	0	0
Otu1832	Bdellovibrio	0	0	5.8931e-05	0	0	0	0	0	0	0	0	0	0	0	0	0	0	0	0	0	0	0	0	0	0	0	0	0	0	0	0	0	0	0	0	0	0	0	0	0	0	0	0	0	0	0	0	0
Otu1833	Unclassified Bacteria	0	0	0.000176793	0	0	0	0	0	0	0	0	0	0	0	0	0	0	0	0	0	0	0	0	0	0	0	0	0	0	0	0	0	0	0	0	0	0	0	0	0	0	0	0	0	0	0	0	0
Otu1834	Flavobacterium	0	0	0	0	0	0	0	0	0	0	0	0	9.081e-05	0	0	0	0	0	0	0	0	0	0	0	0	0	0	0	0	0	0	0	0	0	0	0	0	0	0	0	0	0	0	0	0	0	0	0
Otu1835	Unclassified Deltaproteobacteria	0	0	0.000117862	0	0	0	0	0	0	0	0	0	0	0	0	0	0	0	0	0	0	0	0	0	0	0	0	0	0	0	0	0	0	0	0	0	0	0	0	0	0	0	0	0	0	0	0	0
Otu1836	Unclassified Clostridiales	0	0	0	0	0	0	0	0	0	0	0	0	0	0	0	0	0	0	0	0	0	0	0	0	0	0	0	0	0	0	0	0	3.09607e-05	0	0	0	0	0	0	0	0	0	0	0	0	0	0	0
Otu1837	Corynebacterium	0	0	0.000294655	0	0	0	0	0	0	0	0	0	0	0	0	0	0	0	0	0	0	0	0	0	0	0	0	0	0	0	0	0	0	0	0	0	0	0	0	0	0	0	0	0	0	0	0	0
Otu1838	Unclassified Comamonadaceae	0	0	0	0	0	0	0	0	0	0	0	0	0	0	0	0	0	0	0	0	0	0	0	0	0	0	2.9391e-05	0	0	0	0	0	6.19214e-05	0	0	0	0	0	0	0	0	0	0	0	0	0	0	0
Otu1839	Unclassified Deltaproteobacteria	0	0	0	0	0	0	0	0	0	0	0	0	0	0	0	4.64016e-05	0	0	0	0	0	0	0	0	0	0	0	0	0	0	0	0	0	0	0	0	0	0	0	0	0	0	0	0	0	0	0	0
Otu1840	Unclassified Gammaproteobacteria	0	0	0.000117862	0	0	0	0	0	0	0	0	0	0	0	0	0	0	0	0	0	0	0	0	0	0	0	0	0	0	0	0	0	0	0	0	0	0	0	0	0	0	0	0	0	0	0	0	0
Otu1841	Unclassified Bacteria	0	0	0	0	0	0	0	0	0	0	0	0	0	0	0	0	0	0	0	0	0	0	0	0	0	0	0	0	0	0	0	0	3.09607e-05	0	0	0	0	0	0	0	0	0	0	0	0	0	0	0
Otu1842	Murdochiella	0	0	0	0	0	0	0	0	0	0	0	0	0	0	0	0	0	0	0	0	0	0	0	0	0	0	0	0	0	0	0	0	3.09607e-05	0	0	0	0	0	0	0	0	0	0	0	0	0	0	0
Otu1843	Unclassified Rhizobiales	0	0	5.8931e-05	0	0	0	0	0	0	0	0	0	0	0	0	0	0	0	0	0	0	0	0	0	0	0	0	0	0	0	0	0	0	0	0	0	0	0	0	0	0	0	0	0	0	0	0	0
Otu1844	Unclassified Planctomycetaceae	0	0	5.8931e-05	0	0	0	0	0	0	0	0	0	0	0	0	0	0	0	0	0	0	0	0	0	0	0	0	0	0	0	0	0	0	0	0	0	0	0	0	0	0	0	0	0	0	0	0	0
Otu1845	Unclassified Bacteria	0	0	5.8931e-05	0	0	0	0	0	0	0	0	0	0	0	0	0	0	0	0	0	0	0	0	0	0	0	0	0	0	0	0	0	0	0	0	0	0	0	0	0	0	0	0	0	0	0	0	0
Otu1846	Unclassified Proteobacteria	0	0	0	0	0	0	0	0	0	0	0	0	0	0	0	0	0	0	0	0	0	0	0	0	0	0	0	0	0	0	0	0	0	0	0	0	0	0	0	0	0	0	0	0	0	7.03408e-05	0	0
Otu1847	Zavarzinella	0	0	0.000117862	0	0	0	0	0	0	0	0	0	0	0	0	0	0	0	0	0	0	0	0	0	0	0	0	0	0	0	0	0	0	0	0	0	0	0	0	0	0	0	0	0	0	0	0	0
Otu1848	Unclassified Bacteroidetes	0	0	0.000117862	0	0	0	0	0	0	0	0	0	0	0	0	0	0	0	0	0	0	0	0	0	0	0	0.000117564	0	0	0	0	0	0	0	0	0	0	0	0	0	0	0	0	0	0	0	0	0
Otu1849	Unclassified Proteobacteria	0	0	0	0	0	0	0	0	0	0	0	0	0	0	0	0	0	0	0	0	0	0	0	0	0	0	0	0	0	0	0	0	0	0	0	0	0	0	0	0	0	0	0	0	0	0	0	2.83503e-05
Otu1850	Unclassified Gammaproteobacteria	0	0	0.000176793	0	0	0	0	0	0	0	0	0	0	0	0	0	0	0	0	0	0	0	0	0	0	0	0	0	0	0	0	0	0	0	0	0	0	0	0	0	0	0	0	0	0	0	0	0
Otu1851	Unclassified Bacteria	0	0	5.8931e-05	0	0	0	0	0	0	0	0	0	0	0	0	0	0	0	0	5.12308e-05	0	0	0	0	0	0	0	0	5.66476e-05	0	0	0	0	0	0	0	0	0	0	0	0	0	0	0	0	0	0	0
Otu1852	Unclassified Burkholderiales	0	0	5.8931e-05	0	0	0	0	0	0	0	0	0	0	0	0	0	0	0	0	0	0	0	0	0	0	0	0	0	0	0	0	0	0	0	0	0	0	0	0	0	0	0	0	0	0	0	0	0
Otu1853	Flavobacterium	0	0	0	0	0	0	0	0	0	0	0	0	0	0	0	0	7.75134e-05	0	0	7.68462e-05	0	0	0	0	0	0	0	0	0	0	0	0	0	0	0	0	0	0	0	0	0	0	0	0	0	0	0	0
Otu1854	Bdellovibrio	0	0	0.000117862	0	0	0	0	0	0	0	0	0	0	0	0	0	0	0	0	0	0	0	0	0	0	0	0	0	0	0	0	0	0	0	0	0	0	0	0	0	0	0	0	0	0	0	0	0
Otu1855	Unclassified Pseudomonadaceae	0	0	0	0	0	0	0	0	0	0	0	0	0	0	0	4.64016e-05	0	0	0	0	0	0	0	0	0	0	0	0	0	0	0	0	0	0	0	0	0	0	0	0	0	0	0	0	0	0	0	0
Otu1856	Unclassified Bradyrhizobiaceae	0	0	0	0	0	0	0	0	0	0	0	0	0	0	0	0	0	0	0	0	0	0	0	0	0	0	0	0	0	0	0	0	0	0	0	0	0	0	0	0	0	0	0	0	0	0	0	2.83503e-05
Otu1857	Unclassified Bacteria	0	0	5.8931e-05	0	0	0	0	0	0	0	0	0	0	0	0	0	0	0	0	0	0	0	0	0	0	0	0	0	0	0	0	0	0	0	0	0	0	0	0	0	0	0	0	0	0	0	0	0
Otu1858	Unclassified Bacteroidetes	0	0	0	0	0	0	0	0	0	0	0	5.87147e-05	0	0	0	0	0	0	0	0	0	0	0	0	0	0	0	0	0	0	0	0	0	0	0	0	0	0	0	0	0	0	0	0	0	0	0	0
Otu1859	Unclassified Betaproteobacteria	0	0	0	0	0	0	0	0	0	0	0	0	0	0	0	9.28031e-05	0	0	0	0	0	0	0	0	0	0	0	0	0	0	0	0	0	0	0	0	0	0	0	0	0	0	0	0	0	0	0	0
Otu1860	Unclassified Actinomycetales	0	0	0	0	0	0	0	0	0	0	0	0	6.054e-05	0	0	0	0	0	0	0	0	0	0	0	0	0	0	0	0	0	0	0	0	0	0	0	0	0	0	0	0	0	0	0	0	0	0	0
Otu1861	3_genus_incertae_sedis	0	0	0.000235724	0	0	0	0	0	0	0	0	0	0	0	0	0	0.000193783	0	0	0	0	0	0	0	0	0	0	0	0	0	0	0	0	0	0	0	0	0	0	0	0	0	0	0	0	0	0	0
Otu1862	Unclassified Bacteria	0	0	5.8931e-05	0	0	0	0	0	0	0	0	0	0	0	0	0	0	0	0	0	0	0	0	0	0	0	0	0	0	0	0	0	0	0	0	0	0	0	0	0	0	0	0	0	0	0	0	0
Otu1863	Unclassified Actinomycetales	0	0	0	0	0	0	0	0	0	0	0	0	0	0	0	0	0	0	0	0	0	0	0	0	0	0	0	0	0	0	0	0	0	0	0	0	0	0	0	0	0	0	0	0	0	0	0	2.83503e-05
Otu1864	Unclassified Bacteria	0	0	5.8931e-05	0	0	0	0	0	0	0	0	0	0	0	0	0	0	0	0	0	0	0	0	0	0	0	0	0	0	0	0	0	0	0	0	0	0	0	0	0	0	0	0	0	0	0	0	0
Otu1865	Unclassified Bacteria	0	0	5.8931e-05	0	0	0	0	0	0	0	0	0	0	0	0	0	0	0	0	0	0	0	0	0	0	0	0	0	0	0	0	0	0	0	0	0	0	0	0	0	0	0	0	0	0	0	0	0
Otu1866	Unclassified Burkholderiales	0	0	0	0	0	0	0	0	0	0	0	0	0	0	0	9.28031e-05	0	0	0	0	0	0	0	0	0	0	0	0	0	0	0	0	0	0	0	0	0	0	0	0	0	0	0	0	0	0	0	0
Otu1867	Corynebacterium	0	0	0	0	0	0	0	0	0	0	0	0	0	0	0	0	0	0	0	0	0	0	0	0	0	0	0	0	0	0	0	0	0	0	0	0	0	0	0	0	0	0	0	0	0	0	0	2.83503e-05
Otu1868	Unclassified Bacteria	0	0	5.8931e-05	0	0	0	0	0	0	0	0	0	0	0	0	0	0	0	0	0	0	0	0	0	0	0	0	0	0	0	0	0	0	0	0	0	0	0	0	0	0	0	0	0	0	0	0	0
Otu1869	Unclassified Porphyromonadaceae	0	0	0	0	0	0	0	0	0	0	0	0	0	0	0	0	0	0	0	0	0	0	0	0	0	0	2.9391e-05	0	0	0	0	0	0	0	0	0	0	0	0	0	0	0	0	0	0	0	0	0
Otu1870	Unclassified Betaproteobacteria	0	0	5.8931e-05	0	0	0	0	0	0	0	0	0	0	0	0	0	0	0	0	0	0	0	0	0	0	0	0	0	0	0	0	0	0	0	0	0	0	0	0	0	0	0	0	0	0	0	0	0
Otu1871	Unclassified Myxococcales	0	0	5.8931e-05	0	0	0	0	0	0	0	0	0	0	0	0	0	0	0	0	0	0	0	0	0	0	0	0	0	0	0	0	0	0	0	0	0	0	0	0	0	0	0	0	0	0	0	0	0
Otu1872	Unclassified Bacteria	0	0	0.000117862	0	0	0	0	0	0	0	0	0	0	0	0	0	0	0	0	0	0	0	0	0	0	0	0	0	0	0	0	0	0	0	0	0	0	0	0	0	0	0	0	0	0	0	0	0
Otu1873	Simkania	0	0	0	0	0	0	0	0	0.000142315	0	0	0	0	0	0	0	0	0	0	0	0	0	0	0	0	0	0	0	0	0	0	0	6.19214e-05	0	0	0	0	0	0	0	0	0	0	0	0	0	0	0
Otu1874	Sphingopyxis	0	0	0	0	0	0	0	0	0	0	0	2.93574e-05	0	0	0	0	0	0	0	0	0	0	0	0	0	0	0	0	0	0	0	0	0	0	0	0	0	0	0	0	0	0	0	0	0	0	0	0
Otu1875	Unclassified Deltaproteobacteria	0	0	5.8931e-05	0	0	0	0	0	0	0	0	0	0	0	0	0	0	0	0	0	0	0	0	0	0	0	0	0	0	0	0	0	0	0	0	0	0	0	0	0	0	0	0	0	0	0	0	0
Otu1876	Capnocytophaga	0	0	0.000117862	0	0	0	0	0	0	0	0	0	0	0	0	0	0	0	0	0	0	0	0	0	0	0	0	0	0	0	0	0	0	0	0	0	0	0	0	0	0	0	0	0	0	0	0	0
Otu1877	Blastomonas	0	0	0	0	0	0	0	0	0	0	0	0	0	0	0	0	7.75134e-05	0	0	0	0	0	0	0	0	0	0	0	0	0	0	0	0	0	0	0	0	0	0	0	0	0	0	0	0	0	0	0
Otu1878	OD1_genus_incertae_sedis	0	0	5.8931e-05	0	0	0	0	0	0	0	0	0	0	0	0	0	0	0	0	0	0	0	0	0	0	0	0	0	0	0	0	0	0	0	0	0	0	0	0	0	0	0	0	0	0	0	0	0
Otu1879	Mycobacterium	0	0	5.8931e-05	0	0	0	0	0	0	0	0	0	0	0	0	0	0	0	0	0	0	0	0	0	0	0	0	0	0	0	0	0	0	0	0	0	0	0	0	0	0	0	0	0	0	0	0	0
Otu1880	Gp16	0	0	0	0	0	0	0	0	0	0	0	0	0	0	0	4.64016e-05	0	0	0	0	0	0	0	0	0	0	0	0	0	0	0	0	0	0	0	0	0	0	0	0	0	0	0	0	0	0	0	0
Otu1881	Exiguobacterium	0	0	0	0	0.000785987	0	0	0	0	0	0	0	0	0	0	0	0	0	0	0	0	0	0	0	0	0	0	0	0	0	0	0	0.000154804	0	0	0	0	0	0	0	0	0	0	0	0	0	0	0
Otu1882	Unclassified Pseudomonadaceae	0	0	0	0	0	0	0	0	0	0	0	0	6.054e-05	0	0	0	0	0	0	0	0	0	0	0	0	0	0	0	0	0	0	0	0	0	0	0	0	0	0	0	0	0	0	0	0	0	0	0
Otu1883	Unclassified Rhodospirillales	0	0	0	0	0	0	0	0	0	0	0	0	0	0	0	0	0	0	0	0	0	0	0	0	0	0	0	0	0	0	0	0	0	0	0	0	0	0	0	0	0	0	0	0	0	0	0	0.000340204
Otu1884	Unclassified Bacteria	0	0	5.8931e-05	0	0	0	0	0	0	0	0	0	0	0	0	0	0	0	0	0	0	0	0	0	0	0	0	0	0	0	0	0	0	0	0	0	0	0	0	0	0	0	0	0	0	0	0	0
Otu1885	Unclassified Bacteria	0	0	0	0	0	0	0	0	0	0	0	0	0	0	0	0	0	0	0	0	0	0	0	0	0	0	0	0	0	0	0	0	0.00043345	5.77034e-05	0	0	0	0	0	0	0	0	0	0	0	0	0	0
Otu1886	Unclassified Bacteria	0	0	5.8931e-05	0	0	0	0	0	0	0	0	0	0	0	0	0	0	0	0	0	0	0	0	0	0	0	0	0	0	0	0	0	0	0	0	0	0	0	0	0	0	0	0	0	0	0	0	0
Otu1887	Unclassified Pseudomonadaceae	0	0	0	0	0	0	0	0	0	0	0	0	0	0	0	0	7.75134e-05	0	0	0	0	0	0	0	0	0	0	0	0	0	0	0	0	0	0	0	0	0	0	0	0	0	0	0	0	0	0	0
Otu1888	Bosea	0	0	0	0	0	0	0	0	0	0	0	0	0	0	0	0	0	0	0	2.56154e-05	0	0	0	0	0	0	0	0	0	0	0	0	0	0	0	0	0	0	0	0	0	0	0	0	0	0	0	0
Otu1889	Clostridium_XlVa	0	0	0	0	0	0	0	0	0	0	0	0	0	0	0	0	0	0	0	0	0	0	0	0	0	0	0	0	0	0	0	0	0	0	0	0	0	0	0	0	0	0	0	0	0	0	0	2.83503e-05
Otu1890	Brevundimonas	0	0	0	0	0	0	0	0	0	0	0	0	0	0	0	0	7.75134e-05	0	0	0	0	0	0	0	0	0	0	0	0	0	0	0	0	0	0	0	0	0	0	0	0	0	0	0	0	0	0	0
Otu1891	Gemmatimonas	0	0	0	0	0	0	0	0	0	0	0	0	0	0	0	0	0	0	0	0	0	0	0	0	0	0	2.9391e-05	0	0	0	0	0	0	0	0	0	0	0	0	0	0	0	0	0	0	0	0	0
Otu1892	Unclassified Bacteroidetes	0	0	5.8931e-05	0	0	0	0	0	0	0	0	0	0	0	0	0	0	0	0	0	0	0	0	0	0	0	0	0	0	0	0	0	0	0	0	0	0	0	0	0	0	0	0	0	0	0	0	0
Otu1893	Prevotella	0	0	0	0	0	0	0	0	0	0	0	0	0	0	0	0	0	0	0	0	0	0	0	0	0	0	2.9391e-05	0	0	0	0	0	0	0	0	0	0	0	0	0	0	0	0	0	0	0	0	0
Otu1894	Unclassified Betaproteobacteria	0	0	0	0	0	0	0	0	0	0	0	0	0	0	0	0	3.87567e-05	0	0	0	0	0	0	0	0	0	0	0	0	0	0	0	0	0	0	0	0	0	0	0	0	0	0	0	0	0	0	0
Otu1895	Unclassified Comamonadaceae	0	0	0	0	0	0	0	0	0	0	0	0	0	0	0	0	0	0	0	0	0	0	0	0	0	0	2.9391e-05	0	0	0	0	0	0	0	0	0	0	0	0	0	0	0	0	0	0	0	0	0
Otu1896	Unclassified Bacteria	0	0	5.8931e-05	0	0	0	0	0	0	0	0	0	0	0	0	0	0	0	0	0	0	0	0	0	0	0	0	0	0	0	0	0	0	0	0	0	0	0	0	0	0	0	0	0	0	0	0	0
Otu1897	Unclassified Bacteria	0	0	0.000117862	0	0	0	0	0	0	0	0	0	0	0	0	0	0	0	0	0	0	0	0	0	0	0	0	0	0	0	0	0	0	0	0	0	0	0	0	0	0	0	0	0	0	0	0	0
Otu1898	Unclassified Proteobacteria	0	0	0.000117862	0	0	0	0	0	0	0	0	0	0	0	0	0	0	0	0	0	0	0	0	0	0	0	0	0	0	0	0	0	0	0	0	0	0	0	0	0	0	0	0	0	0	0	0	0
Otu1899	Unclassified Sphingomonadaceae	0	0	0	0	0	0	0	0	0	0	0	0	0	0	0	0	7.75134e-05	0	0	0	0	0	0	0	0	0	0	0	0	0	0	0	0	0	0	0	0	0	0	0	0	0	0	0	0	0	0	0
Otu1900	Unclassified Bacteria	0	0	0	0	0	0	0	0	0	0	0	0	0	0	0	0	3.87567e-05	0	0	0	0	0	0	0	0	0	0	0	0	0	0	0	0	0	0	0	0	0	0	0	0	0	0	0	0	0	0	0
Otu1901	Unclassified Bacteria	0	0	5.8931e-05	0	0	0	0	0	0	0	0	0	0	0	0	0	0	0	0	0	0	0	0	0	0	0	0	0	0	0	0	0	0	0	0	0	0	0	0	0	0	0	0	0	0	0	0	0
Otu1902	Hydrogenophaga	0	0	5.8931e-05	0	0	0	0	0	0	0	0	0	0	0	0	0	0	0	0	0	0	0	0	0	0	0	0	0	0	0	0	0	0	0	0	0	0	0	0	0	0	0	0	0	0	0	0	0
Otu1903	Unclassified Bacteria	0	0	0	0	0	0	0	0	0	0	0	0	0	0	0	0	3.87567e-05	0	0	0	0	0	0	0	0	0	0	0	0	0	0	0	0	0	0	0	0	0	0	0	0	0	0	0	0	0	0	0
Otu1904	Unclassified Bacteria	0	0	0	0	0	0	0	0	0	0	0	0	0	0	0	0	0	0	0	0	0	0	0	0	0	0	0	0	0	0	0	0	0	0	0	0	0	0	0	0	0	0	0	0	0	0	0	2.83503e-05
Otu1905	Cloacibacillus	0	0	5.8931e-05	0	0	0	0	0	0	0	0	0	0	0	0	0	0	0	0	0	0	0	0	0	0	0	0	0	0	0	0	0	0	0	0	0	0	0	0	0	0	0	0	0	0	0	0	0
Otu1906	Unclassified Betaproteobacteria	0	0	0	0	0	0	0	0	0	0	0	0	0	0	0	9.28031e-05	0	0	0	0	0	0	0	0	0	0	0	0	0	0	0	0	0	0	0	0	0	0	0	0	0	0	0	0	0	0	0	0
Otu1907	Bdellovibrio	0	0	0	0	0	0	0	0	0	0	0	0	0	0	0	0	0	0	0	0	0	0	0	0	0	0	2.9391e-05	0	0	0	0	0	0	0	0	0	0	0	0	0	0	0	0	0	0	0	0	0
Otu1908	Arthrobacter	0	0	5.8931e-05	0	0	0	0	0	0	0	0	0	0	0	0	0	0	0	0	0	0	0	0	0	0	0	0	0	0	0	0	0	0	0	0	0	0	0	0	0	0	0	0	0	0	0	0	0
Otu1909	Unclassified Betaproteobacteria	0	0	0	0	0	0	0	0	0	0	0	0	0	0	0	9.28031e-05	0	0	0	0	0	0	0	0	0	0	0	0	0	0	0	0	0	0	0	0	0	0	0	0	0	0	0	0	0	0	0	0
Otu1910	3_genus_incertae_sedis	0	0	5.8931e-05	0	0	0	0	0	0	0	0	0	0	0	0	0	0	0	0	0	0	0	0	0	0	0	0	0	0	0	0	0	0	0	0	0	0	0	0	0	0	0	0	0	0	0	0	0
Otu1911	Catonella	0	0	0	0	0	0	0	0	0	0	0	0	0	0	0	0	0	0	0	0	0	0	0	0	0	0	0	0	0	0	0	0	3.09607e-05	0	0	0	0	0	0	0	0	0	0	0	0	0	0	0
Otu1912	Unclassified Rhodospirillales	0	0	0	0	0	0	0	0	0	0	0	0	0	0	0	4.64016e-05	0	0	0	0	0	0	0	0	0	0	0	0	0	0	0	0	0	0	0	0	0	0	0	0	0	0	0	0	0	0	0	0
Otu1913	Sphingopyxis	0	0	0	0	0	0	0	0	0	0	0	0	0	0	0	0	0	0	0	0	0	0	0	0	0	0	0	0	0	0	0.000117897	0	0	0	0	0	0	0	0	0	0	0	0	0	0	0	0	0
Otu1914	Unclassified Bacteroidetes	0	0	0	0	0	0	0	0	0	0	0	0	0	0	0	0	0	0	0	0	0	0	0	0	0	0	0	0	0	0	0	0	3.09607e-05	0	0	0	0	0	0	0	0	0	0	0	0	0	0	0
Otu1915	Unclassified Betaproteobacteria	0	0	0	0	0	0	0	0	0	0	0	0	0	0	0	0	0	0	0	0	0	0	0	0	0	0	5.8782e-05	0	0	0	0	0	0	0	0	0	0	0	0	0	0	0	0	0	0	0	0	0
Otu1916	Unclassified Actinomycetales	0	0	0	0	0	0	0	0	0	0	0	2.93574e-05	0	0	0	0	0	0	0	0	0	0	0	0	0	0	0	0	0	0	0	0	0	0	0	0	0	0	0	0	0	0	0	0	0	0	0	0
Otu1917	Unclassified Sphingobacteriales	0	0	5.8931e-05	0	0	0	0	0	0	0	0	0	0	0	0	0	0	0	0	0	0	0	0	0	0	0	0	0	0	0	0	0	0	0	0	0	0	0	0	0	0	0	0	0	0	0	0	0
Otu1918	Unclassified Bacteroidetes	0	0	0	0	0	0	0	0	0	0	0	2.93574e-05	0	0	0	0	0	0	0	0	2.77917e-05	0	0	0	0	0	0	0	0	0	0	0	0	0	0	0	0	0	0	0	0	0	0	0	0	0	0	0
Otu1919	Gp6	0	0	0	0	0	0	0	0	0	0	0	0	0	0	0	0	0	0	0	0	0	0	0	0	0	0	0	0	0	0	0	0	0	0	0	0	0	0	0	0	0	0	0	0	0	0	0	0
Otu1920	Unclassified Myxococcales	0	0	0	0	0	0	0	0	0	0	0	0	0	0	0	0	0	0	0	0	0	0	0	0	0	0	0	0	0	0	0	0	0	0	0	0	0	0	0	0	0	0	0	0	0	0	0	0
Otu1921	Unclassified Bacteria	0	0	0	0	0	0	0	0	0	0	0	0	0	0	0	0	0	0	0	0	0	0	0	0	0	0	0	0	0	0	0	0	0	0	0	0	0	0	0	0	0	0	0	0	0	0	0	0
Otu1922	Unclassified Bacteria	0	0	0	0	0	0	0	0	0	0	0	0	0	0	0	0	0	0	0	0	0	0	0	0	0	0	0	0	0	0	0	0	0	0	0	0	0	0	0	0	0	0	0	0	0	0	0	0
Otu1923	Unclassified Bacteria	0	0	0	0	0	0	0	0	0	0	0	0	0	0	0	0	0	0	0	0	0	0	0	0	0	0	0	0	0	0	0	0	0	0	0	0	0	0	0	0	0	0	0	0	0	0	0	0
Otu1924	Unclassified Planctomycetaceae	0	0	0	0	0	0	0	0	0	0	0	0	0	0	0	0	0	0	0	0	0	0	0	0	0	0	0	0	0	0	0	0	0	0	0	0	0	0	0	0	0	0	0	0	0	0	0	0
Otu1925	Unclassified Bacteria	0	0	0	0	0	0	0.000179533	0	0	0	0	0	0	0	0	0	0	0	0	0	0	0	0	0	0	0	0	0	0	0	0	0	0	0	0	0	0	0	0	0	0	0	0	0	0	0	0	0
Otu1926	Spartobacteria_genera_incertae_sedis	0	0	0	0	0	0	0	0	0	0	0	0	0	0	0	0	0	0	0	0	0	0	0	0	0	0	0	0	0	0	0	0	0	0	0	0	0	0	0	0	0	0	0	0	0	0	0	0
Otu1927	Unclassified Chloroflexi	0	0	0	0	0	0	0	0	0	0	0	0	0	0	5.06997e-05	0	0	0	0	0	0	0	0	0	0	0	0	0	0	0	0	0	0	0	0	0	0	0	0	0	0	0	0	0	0	0	0	0
Otu1928	Unclassified Ruminococcaceae	0	0	0	0	0	0	0.000359066	0	0	0	0	0	0	0	0	0	0	0	0	0	0	0	0	0	0	0	0	0	0	0	0	0	0	0	0	0	0	0	0	0	0	0	0	0	0	0	0	0
Otu1929	Gp1	0	0	0	0	0	0	0	0	0	0	0	0	0	0	0	0	0	0	0	0	0	0	0	0	0	0	0	0	0	0	0	0	0	0	0	0	0	0	0	0	0	0	0	0	0	0	0	0
Otu1930	Ktedonobacter	0	0	0	0	0	0	0	0	0	0	0	0	0	0	0	0	0	0	0	0	0	0	0	0	0	0	0	0	0	0	0	0	0	0	0	0	0	0	0	0	0	0	0	0	0	0	0	0
Otu1931	Cytophaga	0	0	0	0	0	0	0	0	0	0	0	0	0	0	0	0	0	0	0	0	0	0	0	0	0	0	0	0	0	0	0	0	0	0	0	0	0	0	0	0	0	0	0	0	0	0	0	0
Otu1932	Unclassified Actinomycetales	0	0	0	0	0	0	0	0	0	0	0	0	0	0	0	0	0	0	0	0	0	0	0	0	0	0	0	0	0	0	0	0	0	0	0	0	0	0	0	0	0	0	0	0	0	0	0	0
Otu1933	Unclassified Planctomycetaceae	0	0	0	0	0	0	0	0	0	0	0	0	0	0	0	0	0	0	0	0	0	0	0	0	0	0	0	0	0	0	0	0	0	0	0	0	0	0	0	0	0	0	0	0	0	0	0	0
Otu1934	Atopobium	0	0	0	0	0	0	0	0	0	0	0	0	0	0	0	0	0	0	0	0	0	0	0	0	0	0	0	0	0	0	0	0	0	0	0	0	0	0	0	0	0	0	0	0	0	0	0	0
Otu1935	Unclassified Bacteria	0	0	0	0	0	0	0	0	0	0	0	0	0	0	0	0	0	0	0	0	0	0	0	0	0	0	0	0	0	0	0	0	0	0	0	0	0	0	0	0	0	0	0	0	0	0	0	0
Otu1936	Unclassified Rhizobiales	0	0	0	0	0	0	0	0	0	0	0	0	0	0	0	0	0	0	0	0	0	0	0	0	0	0	0	0	0	0	0	0	0	0	0	0	0	0	0	0	0	0	0	0	0	0	0	0
Otu1937	Unclassified Rhodospirillales	0	0	0	0	0	0	0	0	0	0	0	0	0	0	0	0	0	0	0	0	0	0	0	0	0	0	0	0	0	0	0	0	0	0	0	0	0	0	0	0	0	0	0	0	0	0	0	0
Otu1938	Gp1	0	0	0	0	0	0	0	0	0	0	0	0	0	0	0	0	0	0	0	0	0	0	0	0	0	0	0	0	0	0	0	0	0	0	0	0	0	0	0	0	0	0	0	0	0	0	0	0
Otu1939	Gemmata	0	0	0	0	0	0	0	0	0	0	0	0	0	0	0	0	0	0	0	0	0	0	0	0	0	0	0	0	0	0	0	0	0	0	0	0	0	0	0	0	0	0	0	0	0	0	0	0
Otu1940	Gp3	0	0	0	0	0	0	0	0	0	0	0	0	0	0	0	0	0	0	0	0	0	0	0	0	0	0	0	0	0	0	0	0	0	0	0	0	0	0	0	0	0	0	0	0	0	0	0	0
Otu1941	Unclassified Chitinophagaceae	0	0	0	0	0	0	0	0	0	0	0	0	0	0	0	0	0	0	0	0	0	0	0	0	0	0	0	0	0	0	0	0	0	0	0	0	0	0	0	0	0	0	0	0	0	0	0	0
Otu1942	Unclassified Bacteria	0	0	0	0	0	0	0.000179533	0	0	0	0	0	0	0	0	0	0	0	0	0	0	0	0	0	0	0	0	0	0	0	0	0	0	0	0	0	0	0	0	0	0	0	0	0	0	0	0	0
Otu1943	Unclassified Gammaproteobacteria	0	0	0	0	0	0	0	0	0	0	0	0	0	0	0	0	0	0	0	0	0	0	0	0	0	0	0	0	0	0	0	0	0	0	0	0	0	0	0	0	0	0	0	0	0	0	0	0
Otu1944	Gp2	0	0	0	0	0	0	0	0	0	0	0	0	0	0	0	0	0	0	0	0	0	0	0	0	0	0	0	0	0	0	0	0	0	0	0	0	0	0	0	0	0	0	0	0	0	0	0	0
Otu1945	Unclassified Xanthomonadaceae	0	0	0	0	0	0	0	0	0	0	0	0	0	4.30274e-05	0	0	0	0	0	0	0	0	0	0	0	0	0	0	0	0	0	0	0	0	0	0	0	0	0	0	0	0	0	0	0	0	0	0
Otu1946	3_genus_incertae_sedis	0	0	0	0	0	0	0	0	0	0	0	0	0	0	0	0	0	0	0	0	0	0	0	0	0	0	0	0	0	0	0	0	0	0	0	0	0	0	0	0	0	0	0	0	0	0	0	0
Otu1947	Unclassified Bacteria	0	0	0	0	0	0	0	0	0	0	0	0	0	0	0	0	0	0	0	0	0	0	0	0	0	0	0	0	0	0	0	0	0	0	0	0	0	0	0	0	0	0	0	0	0	0	0	0
Otu1948	OD1_genus_incertae_sedis	0	0	0	0	0	0	8.97666e-05	0	0	0	0	0	0	0	0	0	0	0	0	0	0	0	0	0	0	0	0	0	0	0	0	0	0	0	0	0	0	0	0	0	0	0	0	0	0	0	0	0
Otu1949	Unclassified Bacteria	0	0	0	0	0	0	8.97666e-05	0	0	0	0	0	0	0	0	0	0	0	0	0	0	0	0	0	0	0	0	0	0	0	0	0	0	0	0	0	0	0	0	0	0	0	0	0	0	0	0	0
Otu1950	Unclassified Actinobacteria	0	0	0	0	0	0	0	0	0	0	0	0	0	0	0	0	0	0	0	0	0	0	0	0	0	0	0	0	0	0	0	0	0	0	0	0	0	0	0	0	0	0	0	0	0	0	0	0
Otu1951	Unclassified Alphaproteobacteria	0	0	0	0	0	0	0	0	0	0	0	0	0	0	0	0	0	0	0	0	0	0	0	0	0	0	0	0	0	0	0	0	0	0	0	0	0	0	0	0	0	0	0	0	0	0	0	0
Otu1952	Porphyromonas	0	0	0	0	0	0	0	0	0	0	0	0	0	4.30274e-05	0	4.64016e-05	0	0	0	0	0	4.11032e-05	0	0	0	0	0	0	0	0	0	0	0	0	0	0	0	0	0	0	0	0	0	0	0	0	0	0
Otu1953	Unclassified Alphaproteobacteria	0	0	0	0	0	0	0	0	0	0	0	0	0	0	0.000101399	0	0	0	0	0	0	0	0	0	0	0	0	0	0	0	0	0	0	0	0	0	0	0	0	0	0	0	0	0	0	0	0	0
Otu1954	Unclassified Planctomycetaceae	0	0	0	0	0	0	0	0	0	0	0	0	0	0	0	0	0	0	0	0	0	0	0	0	0	0	0	0	0	0	0	0	0	0	0	0	0	0	0	0	0	0	0	0	0	0	0	0
Otu1955	Gp4	0	0	0	0	0	0	0	0	0	0	0	0	0	0	0	0	0	0	0	0	0	0	0	0	0	0	0	0	0	0	0	0	0	0	0	0	0	0	0	0	0	0	0	0	0	0	0	0
Otu1956	Unclassified Sphingobacteriaceae	0	0	0	0	0	0	0	0	0	0	0	0	0	0	0	0	0	0	0	0	0	0	0	0	0	0	0	0	0	0	0	0	0	0	0	0	0	0	0	0	0	0	0	0	0	0	0	0
Otu1957	Unclassified Planctomycetaceae	0	0	0	0	0	0	8.97666e-05	0	0	0	0	0	0	0	0	0	0	0	0	0	0	0	0	0	0	0	0	0	0	0	0	0	0	0	0	0	0	0	0	0	0	0	0	0	0	0	0	0
Otu1958	Unclassified Bacteria	0	0	0	0	0	0	0	0	0	0	0	0	0	0	0	0	0	0	0	0	0	0	0	0	0	0	0	0	0	0	0	0	0	0	0	0	0	0	0	0	0	0	0	0	0	0	0	0
Otu1959	Unclassified Betaproteobacteria	0	0	0	0	0	0	0	0	0	0	0	0	0	0	0	0	0	0	0	0	0	0	0	0	0	0	0	0	0	0	0	0	0	0	0	0	0	0	0	0	0	0	0	0	0	0	0	0
Otu1960	Mucilaginibacter	0	0	0	0	0	0	0	0	0	0	0	0	0	0	0	0	0	0	0	0	0	0	0	0	0	0	0	0	0	0	0	0	0	0	0	0	0	0	0	0	0	0	0	0	0	0	0	0
Otu1961	Unclassified Bacteria	0	0	0	0	0	0	0	0	0	0	0	0	0	0	0	0	0	0	0	0	0	0	0	0	0	0	0	0	0	0	0	0	0	0	0	0	0	0	0	0	0	0	0	0	0	0	0	0
Otu1962	OD1_genus_incertae_sedis	0	0	0	0	0	0	8.97666e-05	0	0	0	0	0	0	0	0	0	0	0	0	0	0	0	0	0	0	0	0	0	0	0	0	0	0	0	0	0	0	0	0	0	0	0	0	0	0	0	0	0
Otu1963	Unclassified Bacteria	0	0	0	0	0	0	0	0	0	0	0	0	0	0	0	0	0	0	0	0	0	0	0	0	0	0	0	0	0	0	0	0	0	0	0	0	0	0	0	0	0	0	0	0	0	0	0	0
Otu1964	Unclassified Chitinophagaceae	0	0	0	0	0	0	8.97666e-05	0	0	0	0	0	0	0	0	0	0	0	0	0	0	0	0	0	0	0	0	0	0	0	0	0	0	0	0	0	0	0	0	0	0	0	0	0	0	0	0	0
Otu1965	Unclassified Bacteria	0	0	0	0	0	0	0	0	0	0	0	0	0	0	0	0	0	0	0	0	0	0	0	0	0	0	0	0	0	0	0	0	0	0	0	0	0	0	0	0	0	0	0	0	0	0	0	0
Otu1966	Unclassified Planctomycetaceae	0	0	0	0	0	0	8.97666e-05	0	0	0	0	0	0	0	0	0	0	0	0	0	0	0	0	0	0	0	0	0	0	0	0	0	0	0	0	0	0	0	0	0	0	0	0	0	0	0	0	0
Otu1967	Unclassified Bacteria	0	0	0	0	0	0	0	0	0	0	0	0	0	8.60548e-05	0	0	0	0	0	0	0	0	0	0	0	0	0	0	0	0	0	0	0	0	0	0	0	0	0	0	0	0	0	0	0	0	0	0
Otu1968	Roseomonas	0	0	0	0	0	0	0.000179533	0	0	0	0	0	0	0	0	0	0	0	0	0	0	0	0	0	0	0	0	0	0	0	0	0	0	0	0	0	0	0	0	0	0	0	0	0	0	0	0	0
Otu1969	Bacteroides	0	0	0	0	0	0	0	0	0	0	0	0	0	0	0	0	0	0	0	0	0	0	0	0	0	0	0	0	0	0	0	0	0	0	0	0	0	0	0	0	0	0	0	0	0	0	0	0
Otu1970	Arenimonas	0	0	0	0	0	0	0	0	0	0	0	0	0	0	0	0	0	0	0	0	0	0	0	0	0	0	0	0	0	0	0	0	0	0	0	0	0	0	0	0	0	0	0	0	0	0	0	0
Otu1971	Gp3	0	0	0	0	0	0	0	0	0	0	0	0	0	0	0	0	0	0	0	0	0	0	0	0	0	0	0	0	0	0	0	0	0	0	0	0	0	0	0	0	0	0	0	0	0	0	0	0
Otu1972	Geminicoccus	0	0	0	0	0	0	0	0	0	0	0	0	0	0	0	0	0	0	0	0	0	0	0	0	0	0	0	0	0	0	0	0	0	0	0	0	0	0	0	0	0	0	0	0	0	0	0	0
Otu1973	Unclassified Flavobacteriales	0	0	0	0	0	0	8.97666e-05	0	0	0	0	0	0	0	0	0	0	0	0	0	0	0	0	0	0	0	0	0	0	0	0	0	0	0	0	0	0	0	0	0	0	0	0	0	0	0	0	0
Otu1974	Unclassified Bacteria	0	0	0	0	0	0	0	0	0	0	0	0	0	0	0	0	0	0	0	0	0	0	0	0	0	0	0	0	0	0	0	0	0	0	0	0	0	0	0	0	0	0	0	0	0	0	0	0
Otu1975	Unclassified Alphaproteobacteria	0	0	0	0	0	0	0	0	0	0	0	0	0	0	0	0	0	0	0	0	0	0	0	0	0	0	0	0	0	0	0	0	0	0	0	0	0	0	0	0	0	0	0	0	0	0	0	0
Otu1976	Unclassified Bacteria	0	0	0	0	0	0	0	0	0	0	0	0	0	0	0	0	0	0	0	0	0	0	0	0	0	0	0	0	0	0	0	0	0	0	0	0	0	0	0	0	0	0	0	0	0	0	0	0
Otu1977	Unclassified Myxococcales	0	0	0	0	0	0	0	0	0	0	0	0	0	0	0	0	0	0	0	0	0	0	0	0	0	0	0	0	0	0	0	0	0	0	0	0	0	0	0	0	0	0	0	0	0	0	0	0
Otu1978	Unclassified Gammaproteobacteria	0	0	0	0	0	0	0	0	0	0	0	0	0	0	0	0	0	0	0	0	0	0	0	0	0	0	0	0	0	0	0	0	0	0	0	0	0	0	0	0	0	0	0	0	0	0	0	0
Otu1979	Unclassified Myxococcales	0	0	0	0	0	0	0	0	0	0	0	0	0	0	0	0	0	0	0	0	0	0	0	0	0	0	0	0	0	0	0	0	0	0	0	0	0	0	0	0	0	0	0	0	0	0	0	0
Otu1980	Gp3	0	0	0	0	0	0	0	0	0	0	0	0	0	0	0	0	0	0	0	0	0	0	0	0	0	0	0	0	0	0	0	0	0	0	0	0	0	0	0	0	0	0	0	0	0	0	0	0
Otu1981	Unclassified Bacteria	0	0	0	0	0	0	0	0	0	0	0	0	0	0	0	0	0	0	0	0	0	0	0	0	0	0	0	0	0	0	0	0	0	0	0	0	0	0	0	0	0	0	0	0	0	0	0	0
Otu1982	Unclassified Proteobacteria	0	0	0	0	0	0	0	0	0	0	0	0	0	0	0	0	0	0	0	0	0	0	0	0	0	0	0	0	0	0	0	0	0	0	0	0	0	0	0	0	0	0	0	0	0	0	0	0
Otu1983	Unclassified Bacteria	0	0	0	0	0	0	0	0	0	0	0	0	0	0	0	0	0	0	0	0	0	0	0	0	0	0	0	0	0	0	0	0	0	0	0	0	0	0	0	0	0	0	0	0	0	0	0	0
Otu1984	Unclassified Alphaproteobacteria	0	0	0	0	0	0	0	0	0	0	0	0	0	0	0	0	0	0	0	0	0	0	0	0	0	0	0	0	0	0	0	0	0	0	0	0	0	0	0	0	0	0	0	0	0	0	0	0
Otu1985	Unclassified Bradyrhizobiaceae	0	0	0	0	0	0	0	0	0	0	0	0	0	0	0	0	0	0	0	0	0	0	0	0	0	0	0	0	0	0	0	0	0	0	0	0	0	0	0	0	0	0	0	0	0	0	0	0
Otu1986	Unclassified Acetobacteraceae	0	0	0	0	0	0	0.000179533	0	0	0	0	0	0	0	0	0	0	0	0	0	0	0	0	0	0	0	0	0	0	0	0	0	0	0	0	0	0	0	0	0	0	0	0	0	0	0	0	0
Otu1987	OD1_genus_incertae_sedis	0	0	0	0	0	0	8.97666e-05	0	0	0	0	0	0	0	0	0	0	0	0	0	0	0	0	0	0	0	8.81731e-05	0	0	0	0	0	0	0	0	0	0	0	0	0	0	0	0	0	0	0	0	0
Otu1988	Unclassified Bacteria	0	0	0	0	0	0	0	0	0	0	0	0	0	0	0	0	0	0	0	0	0	0	0	0	0	0	0	0	0	0	0	0	0	0	0	0	0	0	0	0	0	0	0	0	0	0	0	0
Otu1989	Gp1	0	0	0	0	0	0	0	0	0	0	0	0	0	0	0	0	0	0	0	0	0	0	0	0	0	0	0	0	0	0	0	0	0	0	0	0	0	0	0	0	0	0	0	0	0	0	0	0
Otu1990	Collinsella	0	0	0	0	0	0	0.0002693	0	0	0	0	0	0	0	0	0	0	0	0	0	0	0	0	0	0	0	0	0	0	0	0	0	0	0	0	0	0	0	0	0	0	0	0	0	0	0	0	0
Otu1991	Unclassified Bacteria	0	0	0	0	0	0	0	0	0	0	0	0	0	0	0	0	0	0	0	0	0	0	0	0	0	0	0	0	0	0	0	0	0	0	0	0	0	0	0	0	0	0	0	0	0	0	0	0
Otu1992	Opitutus	0	0	0	0	0	0	0	0	0	0	0	0	0	0	0	0	0	0	0	0	0	0	0	0	0	0	0	0	0	0	0	0	0	0	0	0	0	0	0	0	0	0	0	0	0	0	0	0
Otu1993	Treponema	0	0	0	0	0	0	0	0	0	0	0	0	0	0	0	0	0	0	0	0	0	0	0	0	0	0	0	0	0	0	0	0	0	0	0	0	0	0	0	0	0	0	0	0	0	0	0	0
Otu1994	Unclassified Bacteria	0	0	0	0	0	0	0	0	0	0	0	0	0	0	0	0	0	0	0	0	0	0	0	0	0	0	0	0	0	0	0	0	0	0	0	0	0	0	0	0	0	0	0	0	0	0	0	0
Otu1995	Ferruginibacter	0	0	0	0	0	0	0	0	0	0	0	0	0	0	0	0	0	0	0	0	0	0	0	0	0	0	0	0	0	0	0	0	0	0	0	0	0	0	0	0	0	0	0	0	0	0	0	0
Otu1996	Spartobacteria_genera_incertae_sedis	0	0	0	0	0	0	0	0	0	0	0	0	0	0	0	0	0	0	0	0	0	0	0	0	0	0	0	0	0	0	0	0	0	0	0	0	0	0	0	0	0	0	0	0	0	0	0	0
[truncated: 603 more rows]
[truncated: 3 more columns]
